# Supplementary material
Source: HighWire-hosted journal article supplement (doi:10.1101/rna.079291.122)
Supplement: Supplemental_Material.xlsx [file Supplemental_Material.xlsx]

## Sheet: Sequences
>genotype_1
GGGAACCCCCCTTCGGGGGGTCACCTCGCGCAGCGGGCTGCGCGAAGGAGCCACGCTGCGAAGCAGCGTGGCGGTTCTCGTGCGTCACCGAAACGCACGAAGGTCGCGCCTCTTCACGAGGCGTCACCTGGGAGAGCGCGAAAGCGCTAGCCCGTGCTCTAGCAGGCCTCGAGATCTCCTCTAGAAATAATTTTGTTTAACTTTAAGAAGGAGATATACATATGTCTAAGACAGCATCTTCGCGTAACTCTCTCAGCGCACAATTGCGCCGAGCCGCGAACACAAGAATTGAGGTTGAAGGTAACCTCGCACTTTCCATTGCCAACGATTTACTGTTGGCCTATGGTCAGTCGCCATTTAACTCTGAGGCTGAGTGTATTTCATTCAGCCCGAGATTCG…
>genotype_2
GGGAACCCCCCTTCGGGGGGTCACCTCGCGCAGCGGGCTGCGCGAAGGAGCCACGCTGCGAAGCAGCGTGGCGGTTCTCGTGCGTCACCGAAACGCACGAAGGTCGCGCCTCTTCACGAGGCGTCACCTGGGAGAGCGCGAAAGCGCTAGCCCGTGCTCTAGCAGGCCTCGAGATCTCCTCTAGAAATAATTTTGTTTAACTTTAAGAAGGAGATATACATATGTCTAAGACAGCATCTTCGCGTAACTCTCTCAGCGCACAATTGCGCCGAGCCGCGAACACAAGAATTGAGGTTGAAGGTAACCTCGCACTTTCCATTGCCAACGATTTACTGTTGGCCTATGGTCAGTCGCCATTTAACTCTGAGGCTGAGTGTATTTCATTCAGCCCGAGATTCG…
>genotype_3
GGGAACCCCCCTTCGGGGGGTCACCTCGCGCAGCGGGCTGCGCGAAGGAGCCACGCTGCGAAGCAGCGTGGCGGTTCTCGTGCGTCACCGAAACGCACGAAGGTCGCGCCTCTTCACGAGGCGTCACCTGGGAGAGCGCGAAAGCGCTAGCCCGTGCTCTAGCAGGCCTCGAGATCTCCTCTAGAGATAATTTTGTTTAACTTTAAGAAGGAGATATACATATGTCTAAGACAGCATCTTCGCGTAACTCTCTCAGCGCACAATTGCGCCGAGCCGCGAACACAAGAATTGAGGTTGAAGGTAACCTCGCACTTTCCATTGCCAACGATTTACTGTTGGCCTATGGTCAGTCGCCATTTAACTCTGAGGCTGAGTGTATTTCATTCAGCCCGAGATTCG…
>genotype_4
GGGAACCCCCCTTCGGGGGGTCACCTCGCGCAGCGGGCTGCGCGAAGGAGCCACGCTGCGAAGCAGCGTGGCGGTTCTCGTGCGTCACCGAAACGCACGAAGGTCGCGCCTCTTCACGAGGCGTCACCTGGGAGAGCGCGAAAGCGCTAGCCCGTGCTCTAGCAGGCCTCGAGATCTCCTCTAGAAATAATTTTGTTTAACTTTAAGAAGGAGATATACATATGTCTAAGACAGCATCTTCGCGTAACTCTCTCAGCGCACAATTGCGCCGAGCCGCGAACACAAGAATTGAGGTTGAAGGTAACCTCGCACTTTCCATTGCCAACGATTTACTGTTGGCCTATGGTCAGTCGCCATTTAACTCTGAGGCTGAGTGTATTTCATTCAGCCCGAGATTCG…
>genotype_5
GGGAACCCCCCTTCGGGGGGTCACCTCGCGCAGCGGGCTGCGCGAAGGAGCCACGCTGCGAAGCAGCGTGGCGGTTCTCGTGCGTCACCGAAACGCACGAAGGTCGCGCCTCTTCACGAGGCGTCACCTGGGAGAGCGCGAAAGCGCTAGCCCGTGCTCTAGCAGGCCTCGAGATCTCCTCTAGAAATAATTTTGTTTAACTCTAAGAAGGAGATATACATATGTCTAAGACAGCATCTTCGCGTAACTCTCTCAGCGCACAATTGCGCCGAGCCGCGAACACAAGAATTGAGGTTGAAGGTAACCTCGCACTTTCCATTGCCAACGATTTACTGTTGGCCTATGGTCAGTCGCCATTTAACTCTGAGGCTGAGTGTATTTCATTCAGCCCGAGATTCG…
>genotype_6
GGGAACCCCCCTTCGGGGGGTCACCTCGCGCAGCGGGCTGCGCGAAGGAGCCACGCTGCGAAGCAGCGTGGCGGTTCTCGTGCGTCACCGAAACGCACGAAGGTCGCGCCTCTTCACGAGGCGTCACCTGGGAGAGCGCGAAAGCGCTAGCCCGTGCTCTAGCAGGTCTCGAGATCTCCTCTAGAAATAATTTTGTTTAACTTTAAGAAGGAGATATACATATGTCTAAGACAGCATCTTCGCGTAACTCTCTCAGCGCACAATTGCGCCGAGCCGCGAACACAAGAATTGAGGTTGAAGGTAACCTCGCACTTTCCATTGCCAACGATTTACTGTTGGCCTATGGTCAGTCGCCATTTAACTCTGAGGCTGAGTGTATTTCATTCAGCCCGAGATTCG…
>genotype_7
GGGAACCCCCCTTCGGGGGGTCACCTCGCGCAGCGGGCTGCGCGAAGGAGCCACGCTGCGAAGCAGCGTGGCGGTTCTCGTGCGTCACCGAAACGCACGAAGGTCGCGCCTCTTCACGAGGCGTCACCTGGGAGAGCGCGAAAGCGCTAGCCCGTGCTCTAGCAGGCCTCGAGATCTCCTCTAGAAATAATTTTGTTTAACTTTAAGAAGGAGATATACATATGTCTAAGACAGCATCTTCGCGTAACTCTCTCAGCGCACAATTGCGCCGAGCCGCGAACACAAGAATTGAGGTTGAAGGTAACCTCGCACTTTCCATTGCCAACGATTTACTGTTGGCCTATGGTCAGTCGCCATTTAACTCTGAGGCTGAGTGTATTTCATTCAGCCCGAGATTCG…
>genotype_8
GGGAACCCCCCTTCGGGGGGTCACCTCGCGCAGCGGGCTGCGCGAAGGAGCCACGCTGCGAAGCAGCGTGGCGGTTCTCGTGCGTCACCGAAACGCACGAAGGTCGCGCCTCTTCACGAGGCGTCACCTGGGAGAGCGCGAAAGCGCTAGCCCGTGCTCTAGCAGGCCTCGAGATCTCCTCTAGAGATAATTTTGTTTAACTTTAAGAAGGAGATATACATATGTCTAAGACAGCATCTTCGCGTAACTCTCTCAGCGCACAATTGCGCCGAGCCGCGAACACAAGAATTGAGGTTGAAGGTAACCTCGCACTTTCCATTGCCAACGATTTACTGTTGGCCTATGGTCAGTCGCCATTTAACTCTGAGGCTGAGTGTATTTCATTCAGCCCGAGATTCG…
>genotype_9
GGGAACCCCCCTTCGGGGGGTCACCTCGCGCAGCGGGCTGCGCGAAGGAGCCACGCTGCGAAGCAGCGTGGCGGTTCTCGTGCGTCACCGAAACGCACGAAGGTCGCGCCTCTTCACGAGGCGTCACCTGGGAGAGCGCGAAAGCGCTAGCCCGTGCTCTAGCAGGCCTCGAGATCTCCTCTAGAAATAATTTTGTTTAACTCTAAGAAGGAGATATACATATGTCTAAGACAGCATCTTCGCGTAACTCTCTCAGCGCACAATTGCGCCGAGCCGCGAACACAAGAATTGAGGTTGAAGGTAACCTCGCACTTTCCATTGCCAACGATTTACTGTTGGCCTATGGTCAGTCGCCATTTAACTCTGAGGCTGAGTGTATTTCATTCAGCCCGAGATTCG…
>genotype_10
GGGAACCCCCCTTCGGGGGGTCACCTCGCGCAGCGGGCTGCGCGAAGGAGCCACGCTGCGAAGCAGCGTGGCGGTTCTCGTGCGTCACCGAAACGCACGAAGGTCGCGCCTCTTCACGAGGCGTCACCTGGGAGAGCGCGAAAGCGCTAGCCCGTGCTCTAGCAGGCCTCGAGATCTCCTCTAGAGATAATTTTGTTTAACTTTAAGAAGGAGATATACATATGTCTAAGACAGCATCTTCGCGTAACTCTCTCAGCGCACAATTGCGCCGAGCCGCGAACACAAGAATTGAGGTTGAAGGTAACCTCGCACTTTCCATTGCCAACGATTTACTGTTGGCCTATGGTCAGTCGCCATTTAACTCTGAGGCTGAGTGTATTTCATTCAGCCCGAGATTCG…
>genotype_11
GGGAACCCCCCTTCGGGGGGTCACCTCGCGCAGCGGGCTGCGCGAAGGAGCCACGCTGCGAAGCAGCGTGGCGGTTCTCGTGCGTCACCGAAACGCACGAAGGTCGCGCCTCTTCACGAGGCGTCACCTGGGAGAGCGCGAAAGCGCTAGCCCGTGCTCTAGCAGGCCTCGAGATCTCCTCTAGAAATAATTTTGTTTAACTCTAAGAAGGAGATATACATATGTCTAAGACAGCATCTTCGCGTAACTCTCTCAGCGCACAATTGCGCCGAGCCGCGAACACAAGAATTGAGGTTGAAGGTAACCTCGCACTTTCCATTGCCAACGATTTACTGTTGGCCTATGGTCAGTCGCCATTTAACTCTGAGGCTGAGTGTATTTCATTCAGCCCGAGATTCG…
>genotype_12
GGGAACCCCCCTTCGGGGGGTCACCTCGCGCAGCGGGCTGCGCGAAGGAGCCACGCTGCGAAGCAGCGTGGCGGTTCTCGTGCGTCACCGAAACGCACGAAGGTCGCGCCTCTTCACGAGGCGTCACCTGGGAGAGCGCGAAAGCGCTAGCCCGTGCTCTAGCAGGTCTCGAGATCTCCTCTAGAGATAATTTTGTTTAACTCTAAGAAGGAGATATACATATGTCTAAGACAGCATCTTCGCGTAACTCTCTCAGCGCACAATTGCGCCGAGCCGCGAACACAAGAATTGAGGTTGAAGGTAACCTCGCACTTTCCATTGCCAACGATTTACTGTTGGCCTATGGTCAGTCGCCATTTAACTCTGAGGCTGAGTGTATTTCATTCAGCCCGAGATTCG…
>genotype_13
GGGAACCCCCCTTCGGGGGGTCACCTCGCGCAGCGGGCTGCGCGAAGGAGCCACGCTGCGAAGCAGCGTGGCGGTTCTCGTGCGTCACCGAAACGCACGAAGGTCGCGCCTCTTCACGAGGCGTCACCTGGGAGAGCGCGAAAGCGCTAGCCCGTGCTCTAGCAGGCCTCGAGATCTCCTCTAGAGATAATTTTGTTTAACTTTAAGAAGGAGATATACATATGTCTAAGACAGCATCTTCGCGTAACTCTCTCAGCGCACAATTGCGCCGAGCCGCGAACACAAGAATTGAGGTTGAAGGTAACCTCGCACTTTCCATTGCCAACGATTTACTGTTGGCCTATGGTCAGTCGCCATTTAACTCTGAGGCTGAGTGTATTTCATTCAGCCCGAGATTCG…
>genotype_14
GGGAACCCCCCTTCGGGGGGTCACCTCGCGCAGCGGGCTGCGCGAAGGAGCCACGCTGCGAAGCAGCGTGGCGGTTCTCGTGCGTCACCGAAACGCACGAAGGTCGCGCCTCTTCACGAGGCGTCACCTGGGAGAGCGCGAAAGCGCTAGCCCGTGCTCTAGCAGGCCTCGAGATCTCCTCTAGAGATAATTTTGTTTAACTTTAAGAAGGAGATATACATATGTCTAAGACAGCATCTTCGCGTAACTCTCTCAGCGCACAATTGCGCCGAGCCGCGAACACAAGAATTGAGGTTGAAGGTAACCTCGCACTTTCCATTGCCAACGATTTACTGTTGGCCTATGGTCAGTCGCCATTTAACTCTGAGGCTGAGTGTATTTCATTCAGCCCGAGATTCG…
>genotype_15
GGGAACCCCCCTTCGGGGGGTCACCTCGCGCAGCGGGCTGCGCGAAGGAGCCACGCTGCGAAGCAGCGTGGCGGTTCTCGTGCGTCACCGAAACGCACGAAGGTCGCGCCTCTTCACGAGGCGTCACCTGGGAGAGCGCGAAAGCGCTAGCCCGTGCTCTAGCAGGCCTCGAGATCTCCTCTAGAAATAATTTTGTTTAACTCTAAGAAGGAGATATACATATGTCTAAGACAGCATCTTCGCGTAACTCTCTCAGCGCACAATTGCGCCGAGCCGCGAACACAAGAATTGAGGTTGAAGGTAACCTCGCACTTTCCATTGCCAACGATTTACTGTTGGCCTATGGTCAGTCGCCATTTAACTCTGAGGCTGAGTGTATTTCATTCAGCCCGAGATTCG…
>genotype_16
GGGAACCCCCCTTCGGGGGGTCACCTCGCGCAGCGGGCTGCGCGAAGGAGCCACGCTGCGAAGCAGCGTGGCGGTTCTCGTGCGTCACCGAAACGCACGAAGGTCGCGCCTCTTCACGAGGCGTCACCTGGGAGAGCGCGAAAGCGCTAGCCCGTGCTCTAGCAGGCCTCGAGATCTCCTCTAGAAATAATTTTGTTTAACTCTAAGAAGGAGATATACATATGTCTAAGACAGCATCTTCGCGTAACTCTCTCAGCGCACAATTGCGCCGAGCCGCGAACACAAGAATTGAGGTTGAAGGTAACCTCGCACTTTCCATTGCCAACGATTTACTGTTGGCCTATGGTCAGTCGCCATTTAACTCTGAGGCTGAGTGTATTTCATTCAGCCCGAGATTCG…
>genotype_17
GGGAACCCCCCTTCGGGGGGTCACCTCGCGCAGCGGGCTGCGCGAAGGAGCCACGCTGCGAAGCAGCGTGGCGGTTCTCGTGCGTCACCGAAACGCACGAAGGTCGCGCCTCTTCACGAGGCGTCACCTGGGAGAGCGCGAAAGCGCTAGCCCGTGCTCTAGCAGGTCTCGAGATCTCCTCTAGAGATAATTTTGTTTAACTCTAAGAAGGAGATATACATATGTCTAAGACAGCATCTTCGCGTAACTCTCTCAGCGCACAATTGCGCCGAGCCGCGAACACAAGAATTGAGGTTGAAGGTAACCTCGCACTTTCCATTGCCAACGATTTACTGTTGGCCTATGGTCAGTCGCCATTTAACTCTGAGGCTGAGTGTATTTCATTCAGCCCGAGATTCG…
>genotype_18
GGGAACCCCCCTTCGGGGGGTCACCTCGCGCAGCGGGCTGCGCGAAGGAGCCACGCTGCGAAGCAGCGTGGCGGTTCTCGTGCGTCACCGAAACGCACGAAGGTCGCGCCTCTTCACGAGGCGTCACCTGGGAGAGCGCGAAAGCGCTAGCCCGTGCTCTAGCAGGCCTCGAGATCTCCTCTAGAAATAATTTTGTTTAACTTTAAGAAGGAGATATACATATGTCTAAGACAGCATCTTCGCGTAACTCTCTCAGCGCACAATTGCGCCGAGCCGCGAACACAAGAATTGAGGTTGAAGGTAACCTCGCACTTTCCATTGCCAACGATTTACTGTTGGCCTATGGTCAGTCGCCATTTAACTCTGAGGCTGAGTGTATTTCATTCAGCCCGAGATTCG…
>genotype_19
GGGAACCCCCCTTCGGGGGGTCACCTCGCGCAGCGGGCTGCGCGAAGGAGCCACGCTGCGAAGCAGCGTGGCGGTTCTCGTGCGTCACCGAAACGCACGAAGGTCGCGCCTCTTCACGAGGCGTCACCTGGGAGAGCGCGAAAGCGCTAGCCCGTGCTCTAGCAGGTCTCGAGATCTCCTCTAGAGATAATTTTGTTTAACTCTAAGAAGGAGATATACATATGTCTAAGACAGCATCTTCGCGTAACTCTCTCAGCGCACAATTGCGCCGAGCCGCGAACACAAGAATTGAGGTTGAAGGTAACCTCGCACTTTCCATTGCCAACGATTTACTGTTGGCCTATGGTCAGTCGCCATTTAACTCTGAGGCTGAGTGTATTTCATTCAGCCCGAGATTCG…
>genotype_20
GGGAACCCCCCTTCGGGGGGTCACCTCGCGCAGCGGGCTGCGCGAAGGAGCCACGCTGCGAAGCAGCGTGGCGGTTCTCGTGCGTCACCGAAACGCACGAAGGTCGCGCCTCTTCACGAGGCGTCACCTGGGAGAGCGCGAAAGCGCTAGCCCGTGCTCTAGCAGGTCTCGAGATCTCCTCTAGAAATAATTTTGTTTAACTCTAAGAAGGAGATATACATATGTCTAAGACAGCATCTTCGCGTAACTCTCTCAGCGCACAATTGCGCCGAGCCGCGAACACAAGAATTGAGGTTGAAGGTAACCTCGCACTTTCCATTGCCAACGATTTACTGTTGGCCTATGGTCAGTCGCCATTTAACTCTGAGGCTGAGTGTATTTCATTCAGCCCGAGATTCG…
>genotype_21
GGGAACCCCCCTTCGGGGGGTCACCTCGCGCAGCGGGCTGCGCGAAGGAGCCACGCTGCGAAGCAGCGTGGCGGTTCTCGTGCGTCACCGAAACGCACGAAGGTCGCGCCTCTTCACGAGGCGTCACCTGGGAGAGCGCGAAAGCGCTAGCCCGTGCTCTAGCAGGTCTCGAGATCTCCTCTAGAGATAATTTTGTTTAACTCTAAGAAGGAGATATACATATGTCTAAGACAGCATCTTCGCGTAACTCTCTCAGCGCACAATTGCGCCGAGCCGCGAACACAAGAATTGAGGTTGAAGGTAACCTCGCACTTTCCATTGCCAACGATTTACTGTTGGCCTATGGTCAGTCGCCATTTAACTCTGAGGCTGAGTGTATTTCATTCAGCCCGAGATTCG…
>genotype_22
GGGAACCCCCCTTCGGGGGGTCACCTCGCGCAGCGGGCTGCGCGAAGGAGCCACGCTGCGAAGCAGCGTGGCGGTTCTCGTGCGTCACCGAAACGCACGAAGGTCGCGCCTCTTCACGAGGCGTCACCTGGGAGAGCGCGAAAGCGCTAGCCCGTGCTCTAGCAGGTCTCGAGATCTCCTCTAGAGATAATTTTGTTTAACTCTAAGAAGGAGATATACATATGTCTAAGACAGCATCTTCGCGTAACTCTCTCAGCGCACAATTGCGCCGAGCCGCGAACACAAGAATTGAGGTTGAAGGTAACCTCGCACTTTCCATTGCCAACGATTTACTGTTGGCCTATGGTCAGTCGCCATTTAACTCTGAGGCTGAGTGTATTTCATTCAGCCCGAGATTCG…
>genotype_23
GGGAACCCCCCTTCGGGGGGTCACCTCGCGCAGCGGGCTGCGCGAAGGAGCCACGCTGCGAAGCAGCGTGGCGGTTCTCGTGCGTCACCGAAACGCACGAAGGTCGCGCCTCTTCACGAGGCGTCACCTGGGAGAGCGCGAAAGCGCTAGCCCGTGCTCTAGCAGGTCTCGAGATCTCCTCTAGAGATAATTTTGTTTAACTCTAAGAAGGAGATATACATATGTCTAAGACAGCATCTTCGCGTAACTCTCTCAGCGCACAATTGCGCCGAGCCGCGAACACAAGAATTGAGGTTGAAGGTAACCTCGCACTTTCCATTGCCAACGATTTACTGTTGGCCTATGGTCAGTCGCCATTTAACTCTGAGGCTGAGTGTATTTCATTCAGCCCGAGATTCG…
>genotype_24
GGGAACCCCCCTTCGGGGGGTCACCTCGCGCAGCGGGCTGCGCGAAGGAGCCACGCTGCGAAGCAGCGTGGCGGTTCTCGTGCGTCACCGAAACGCACGAAGGTCGCGCCTCTTCACGAGGCGTCACCTGGGAGAGCGCGAAAGCGCTAGCCCGTGCTCTAGCAGGTCTCGAGATCTCCTCTAGAGATAATTTTGTTTAACTCTAAGAAGGAGATATACATATGTCTAAGACAGCATCTTCGCGTAACTCTCTCAGCGCACAATTGCGCCGAGCCGCGAACACAAGAATTGAGGTTGAAGGTAACCTCGCACTTTCCATTGCCAACGATTTACTGTTGGCCTATGGTCAGTCGCCATTTAACTCTGAGGCTGAGTGTATTTCATTCAGCCCGAGATTCG…
>genotype_25
GGGAACCCCCCTTCGGGGGGTCACCTCGCGCAGCGGGCTGCGCGAAGGAGCCACGCTGCGAAGCAGCGTGGCGGTTCTCGTGCGTCACCGAAACGCACGAAGGTCGCGCCTCTTCACGAGGCGTCACCTGGGAGAGCGCGAAAGCGCTAGCCCGTGCTCTAGCAGGTCTCGAGATCTCCTCTAGAGATAATTTTGTTTAACTCTAAGAAGGAGATATACATATGTCTAAGACAGCATCTTCGCGTAACTCTCTCAGCGCACAATTGCGCCGAGCCGCGAACACAAGAATTGAGGTTGAAGGTAACCTCGCACTTTCCATTGCCAACGATTTACTGTTGGCCTATGGTCAGTCGCCATTTAACTCTGAGGCTGAGTGTATTTCATTCAGCCCGAGATTCG…
>genotype_26
GGGAACCCCCCTTCGGGGGGTCACCTCGCGCAGCGGGCTGCGCGAAGGAGCCACGCTGCGAAGCAGCGTGGCGGTTCTCGTGCGTCACCGAAACGCACGAAGGTCGCGCCTCTTCACGAGGCGTCACCTGGGAGAGCGCGAAAGCGCTAGCCCGTGCTCTAGCAGGTCTCGAGATCTCCTCTAGAGATAATTTTGTTTAACTCTAAGAAGGAGATATACATATGTCTAAGACAGCATCTTCGCGTAACTCTCTCAGCGCACAATTGCGCCGAGCCGCGAACACAAGAATTGAGGTTGAAGGTAACCTCGCACTTTCCATTGCCAACGATTTACTGTTGGCCTATGGTCAGTCGCCATTTAACTCTGAGGCTGAGTGTATTTCATTCAGCCCGAGATTCG…
>genotype_27
GGGAACCCCCCTTCGGGGGGTCACCTCGCGCAGCGGGCTGCGCGAAGGAGCCACGCTGCGAAGCAGCGTGGCGGTTCTCGTGCGTCACCGAAACGCACGAAGGTCGCGCCTCTTCACGAGGCGTCACCTGGGAGAGCGCGAAAGCGCTAGCCCGTGCTCTAGCAGGTCTCGAGATCTCCTCTAGAGATAATTTTGTTTAACTCTAAGAAGGAGATATACATATGTCTAAGACAGCATCTTCGCGTAACTCTCTCAGCGCACAATTGCGCCGAGCCGCGAACACAAGAATTGAGGTTGAAGGTAACCTCGCACTTTCCATTGCCAACGATTTACTGTTGGCCTATGGTCAGTCGCCATTTAACTCTGAGGCTGAGTGTATTTCATTCAGCCCGAGATTCG…
>genotype_28
GGGAACCCCCCTTCGGGGGGTCACCTCGCGCAGCGGGCTGCGCGAAGGAGCCACGCTGCGAAGCAGCGTGGCGGTTCTCGTGCGTCACCGAAACGCACGAAGGTCGCGCCTCTTCACGAGGCGTCACCTGGGAGAGCGCGAAAGCGCTAGCCCGTGCTCTAGCAGGTCTCGAGATCTCCTCTAGAGATAATTTTGTTTAACTCTAAGAAGGAGATATACATATGTCTAAGACAGCATCTTCGCGTAACTCTCTCAGCGCACAATTGCGCCGAGCCGCGAACACAAGAATTGAGGTTGAAGGTAACCTCGCACTTTCCATTGCCAACGATTTACTGTTGGCCTATGGTCAGTCGCCATTTAACTCTGAGGCTGAGTGTATTTCATTCAGCCCGAGATTCG…
>genotype_29
GGGAACCCCCCTTCGGGGGGTCACCTCGCGCAGCGGGCTGCGCGAAGGAGCCACGCTGCGAAGCAGCGTGGCGGTTCTCGTGCGTCACCGAAACGCACGAAGGTCGCGCCTCTTCACGAGGCGTCACCTGGGAGAGCGCGAAAGCGCTAGCCCGTGCTCTAGCAGGTCTCGAGATCTCCTCTAGAGATAATTTTGTTTAACTCTAAGAAGGAGATATACATATGTCTAAGACAGCATCTTCGCGTAACTCTCTCAGCGCACAATTGCGCCGAGCCGCGAACACAAGAATTGAGGTTGAAGGTAACCTCGCACTTTCCATTGCCAACGATTTACTGTTGGCCTATGGTCAGTCGCCATTTAACTCTGAGGCTGAGTGTATTTCATTCAGCCCGAGATTCG…
>genotype_30
GGGAACCCCCCTTCGGGGGGTCACCTCGCGCAGCGGGCTGCGCGAAGGAGCCACGCTGCGAAGCAGCGTGGCGGTTCTCGTGCGTCACCGAAACGCACGAAGGTCGCGCCTCTTCACGAGGCGTCACCTGGGAGAGCGCGAAAGCGCTAGCCCGTGCTCTAGCAGGTCTCGAGATCTCCTCTAGAAATAATTTTGTTTAACTCTAAGAAGGAGATATACATATGTCTAAGACAGCATCTTCGCGTAACTCTCTCAGCGCACAATTGCGCCGAGCCGCGAACACAAGAATTGAGGTTGAAGGTAACCTCGCACTTTCCATTGCCAACGATTTACTGTTGGCCTATGGTCAGTCGCCATTTAACTCTGAGGCTGAGTGTATTTCATTCAGCCCGAGATTCG…
>genotype_31
GGGAACCCCCCTTCGGGGGGTCACCTCGCGCAGCGGGCTGCGCGAAGGAGCCACGCTGCGAAGCAGCGTGGCGGTTCTCGTGCGTCACCGAAACGCACGAAGGTCGCGCCTCTTCACGAGGCGTCACCTGGGAGAGCGCGAAAGCGCTAGCCCGTGCTCTAGCAGGTCTCGAGATCTCCTCTAGAGATAATTTTGTTTAACTCTAAGAAGGAGATATACATATGTCTAAGACAGCATCTTCGCGTAACTCTCTCAGCGCACAATTGCGCCGAGCCGCGAACACAAGAATTGAGGTTGAAGGTAACCTCGCACTTTCCATTGCCAACGATTTACTGTTGGCCTATGGTCAGTCGCCATTTAACTCTGAGGCTGAGTGTATTTCATTCAGCCCGAGATTCG…
>genotype_32
GGGAACCCCCCTTCGGGGGGTCACCTCGCGCAGCGGGCTGCGCGAAGGAGCCACGCTGCGAAGCAGCGTGGCGGTTCTCGTGCGTCACCGAAACGCACGAAGGTCGCGCCTCTTCACGAGGCGTCACCTGGGAGAGCGCGAAAGCGCTAGCCCGTGCTCTAGCAGGTCTCGAGATCTCCTCTAGAGATAATTTTGTTTAACTCTAAGAAGGAGATATACATATGTCTAAGACAGCATCTTCGCGTAACTCTCTCAGCGCACAATTGCGCCGAGCCGCGAACACAAGAATTGAGGTTGAAGGTAACCTCGCACTTTCCATTGCCAACGATTTACTGTTGGCCTATGGTCAGTCGCCATTTAACTCTGAGGCTGAGTGTATTTCATTCAGCCCGAGATTCG…
>genotype_33
GGGAACCCCCCTTCGGGGGGTCACCTCGCGCAGCGGGCTGCGCGAAGGAGCCACGCTGCGAAGCAGCGTGGCGGTTCTCGTGCGTCACCGAAACGCACGAAGGTCGCGCCTCTTCACGAGGCGTCACCTGGGAGAGCGCGAAAGCGCTAGCCCGTGCTCTAGCAGGTCTCGAGATCTCCTCTAGAGATAATTTTGTTTAACTCTAAGAAGGAGATATACATATGTCTAAGACAGCATCTTCGCGTAACTCTCTCAGCGCACAATTGCGCCGAGCCGCGAACACAAGAATTGAGGTTGAAGGTAACCTCGCACTTTCCATTGCCAACGATTTACTGTTGGCCTATGGTCAGTCGCCATTTAACTCTGAGGCTGAGTGTATTTCATTCAGCCCGAGATTCG…
>genotype_34
GGGAACCCCCCTTCGGGGGGTCACCTCGCGCAGCGGGCTGCGCGAAGGAGCCACGCTGCGAAGCAGCGTGGCGGTTCTCGTGCGTCACCGAAACGCACGAAGGTCGCGCCTCTTCACGAGGCGTCACCTGGGAGAGCGCGAAAGCGCTAGCCCGTGCTCTAGCAGGTCTCGAGATCTCCTCTAGAGATAATTTTGTTTAACTCTAAGAAGGAGATATACATATGTCTAAGACAGCATCTTCGCGTAACTCTCTCAGCGCACAATTGCGCCGAGCCGCGAACACAAGAATTGAGGTTGAAGGTAACCTCGCACTTTCCATTGCCAACGATTTACTGTTGGCCTATGGTCAGTCGCCATTTAACTCTGAGGCTGAGTGTATTTCATTCAGCCCGAGATTCG…
>genotype_35
GGGAACCCCCCTTCGGGGGGTCACCTCGCGCAGCGGGCTGCGCGAAGGAGCCACGCTGCGAAGCAGCGTGGCGGTTCTCGTGCGTCACCGAAACGCACGAAGGTCGCGCCTCTTCACGAGGCGTCACCTGGGAGAGCGCGAAAGCGCTAGCCCGTGCTCTAGCAGGTCTCGAGATCTCCTCTAGAGATAATTTTGTTTAACTCTAAGAAGGAGATATACATATGTCTAAGACAGCATCTTCGCGTAACTCTCTCAGCGCACAATTGCGCCGAGCCGCGAACACAAGAATTGAGGTTGAAGGTAACCTCGCACTTTCCATTGCCAACGATTTACTGTTGGCCTATGGTCAGTCGCCATTTAACTCTGAGGCTGAGTGTATTTCATTCAGCCCGAGATTCG…
>genotype_36
GGGAACCCCCCTTCGGGGGGTCACCTCGCGCAGCGGGCTGCGCGAAGGAGCCACGCTGCGAAGCAGCGTGGCGGTTCTCGTGCGTCACCGAAACGCACGAAGGTCGCGCCTCTTCACGAGGCGTCACCTGGGAGAGCGCGAAAGCGCTAGCCCGTGCTCTAGCTCTAGCAGGTCTCGAGATCTCCTCTAGAGATAATTTTGTTTAACTCTAAGAAGGAGATATACATATGTCTAAGACAGCATCTTCGCGTAACTCTCTCAGCGCACAATTGCGCCGAGCCGCGAACACAAGAATTGAGGTTGAAGGTAACCTCGCACTTTCCATTGCCAACGATTTACTGTTGGCCTATGGTCAGTCGCCATTTAACTCTGAGGCTGAGTGTATTTCATTCAGCCCGA…
>genotype_37
GGGAACCCCCCTTCGGGGGGTCACCTCGCGCAGCGGGCTGCGCGAAGGAGCCACGCTGCGAAGCAGCGTGGCGGTTCTCGTGCGTCACCGAAACGCACGAAGGTCGCGCCTCTTCACGAGGCGTCACCTGGGAGAGCGCGAAAGCGCTAGCCCGTGCTCTAGCTCTAGCAGGTCTCGAGATCTCCTCTAGAGATAATTTTGTTTAACTCTAAGAAGGAGATATACATATGTCTAAGACAGCATCTTCGCGTAACTCTCTCAGCGCACAATTGCGCCGAGCCGCGAACACAAGAATTGAGGTTGAAGGTAACCTCGCACTTTCCATTGCCAACGATTTACTGTTGGCCTATGGTCAGTCGCCATTTAACTCTGAGGCTGAGTGTATTTCATTCAGCCCGA…
>genotype_38
GGGAACCCCCCTTCGGGGGGTCACCTCGCGCAGCGGGCTGCGCGAAGGAGCCACGCTGCGAAGCAGCGTGGCGGTTCTCGTGCGTCACCGAAACGCACGAAGGTCGCGCCTCTTCACGAGGCGTCACCTGGGAGAGCGCGAAAGCGCTAGCCCGTGCTCTAGCTCTAGCAGGTCTCGAGATCTCCTCTAGAGATAATTTTGTTTAACTCTAAGAAGGAGATATACATATGTCTAAGACAGCATCTTCGCGTAACTCTCTCAGCGCACAATTGCGCCGAGCCGCGAACACAAGAATTGAGGTTGAAGGTAACCTCGCACTTTCCATTGCCAACGATTTACTGTTGGCCTATGGTCAGTCGCCATTTAACTCTGAGGCTGAGTGTATTTCATTCAGCCCGA…
>genotype_39
GGGAACCCCCCTTCGGGGGGTCACCTCGCGCAGCGGGCTGCGCGAAGGAGCCACGCTGCGAAGCAGCGTGGCGGTTCTCGTGCGTCACCGAAACGCACGAAGGTCGCGCCTCTTCACGAGGCGTCACCTGGGAGAGCGCGAAAGCGCTAGCCCGTGCTCTAGCTCTAGCAGGTCTCGAGATCTCCTCTAGAGATAATTTTGTTTAACTCTAAGAAGGAGATATACATATGTCTAAGACAGCATCTTCGCGTAACTCTCTCAGCGCACAATTGCGCCGAGCCGCGAACACAAGAATTGAGGTTGAAGGTAACCTCGCACTTTCCATTGCCAACGATTTACTGTTGGCCTATGGTCAGTCGCCATTTAACTCTGAGGCTGAGTGTATTTCATTCAGCCCGA…
>genotype_40
GGGAACCCCCCTTCGGGGGGTCACCTCGCGCAGCGGGCTGCGCGAAGGAGCCACGCTGCGAAGCAGCGTGGCGGTTCTCGTGCGTCACCGAAACGCACGAAGGTCGCGCCTCTTCACGAGGCGTCACCTGGGAGAGCGCGAAAGCGCTAGCCCGTGCTCTAGCTCTAGCAGGTCTCGAGATCTCCTCTAGAGATAATTTTGTTTAACTCTAAGAAGGAGATATACATATGTCTAAGACAGCATCTTCGCGTAACTCTCTCAGCGCACAATTGCGCCGAGCCGCGAACACAAGAATTGAGGTTGAAGGTAACCTCGCACTTTCCATTGCCAACGATTTACTGTTGGCCTATGGTCAGTCGCCATTTAACTCTGAGGCTGAGTGTATTTCATTCAGCCCGA…
>genotype_41
GGGAACCCCCCTTCGGGGGGTCACCTCGCGCAGCGGGCTGCGCGAAGGAGCCACGCTGCGAAGCAGCGTGGCGGTTCTCGTGCGTCACCGAAACGCACGAAGGTCGCGCCTCTTCACGAGGCGTCACCTGGGAGAGCGCGAAAGCGCTAGCCCGTGCTCTAGCTCTAGCAGGTCTCGAGATCTCCTCTAGAGATAATTTTGTTTAACTCTAAGAAGGAGATATACATATGTCTAAGACAGCATCTTCGCGTAACTCTCTCAGCGCACAATTGCGCCGAGCCGCGAACACAAGAATTGAGGTTGAAGGTAACCTCGCACTTTCCATTGCCAACGATTTACTGTTGGCCTATGGTCAGTCGCCATTTAACTCTGAGGCTGAGTGTATTTCATTCAGCCCGA…
>genotype_42
GGGAACCCCCCTTCGGGGGGTCACCTCGCGCAGCGGGCTGCGCGAAGGAGCCACGCTGCGAAGCAGCGTGGCGGTTCTCGTGCGTCACCGAAACGCACGAAGGTCGCGCCTCTTCACGAGGCGTCACCTGGGAGAGCGCGAAAGCGCTAGCCCGTGCTCTAGCTCTAGCAGGTCTCGAGATCTCCTCTAGAGATAATTTTGTTTAACTCTAAGAAGGAGATATACATATGTCTAAGACAGCATCTTCGCGTAACTCTCTCAGCGCACAATTGCGCCGAGCCGCGAACACAAGAATTGAGGTTGAAGGTAACCTCGCACTTTCCATTGCCAACGATTTACTGTTGGCCTATGGTCAGTCGCCATTTAACTCTGAGGCTGAGTGTATTTCATTCAGCCCGA…
>genotype_43
GGGAACCCCCCTTCGGGGGGTCACCTCGCGCAGCGGGCTGCGCGAAGGAGCCACGCTGCGAAGCAGCGTGGCGGTTCTCGTGCGTCACCGAAACGCACGAAGGTCGCGCCTCTTCACGAGGCGTCACCTGGGAGAGCGCGAAAGCGCTAGCCCGTGCTCTAGCTCTAGCAGGTCTCGAGATCTCCTCTAGAGATAATTTTGTTTAACTCTAAGAAGGAGATATACATATGTCTAAGACAGCATCTTCGCGTAACTCTCTCAGCGCACAATTGCGCCGAGCCGCGAACACAAGAATTGAGGTTGAAGGTAACCTCGCACTTTCCATTGCCAACGATTTACTGTTGGCCTATGGTCAGTCGCCATTTAACTCTGAGGCTGAGTGTATTTCATTCAGCCCGA…
>genotype_44
GGGAACCCCCCTTCGGGGGGTCACCTCGCGCAGCGGGCTGCGCGAAGGAGCCACGCTGCGAAGCAGCGTGGCGGTTCTCGTGCGTCACCGAAACGCACGAAGGTCGCGCCTCTTCACGAGGCGTCACCTGGGAGAGCGCGAAAGCGCTAGCCCGTGCTCTAGCTCTAGCAGGTCTCGAGATCTCCTCTAGAGATAATTTTGTTTAACTCTAAGAAGGAGATATACATATGTCTAAGACAGCATCTTCGCGTAACTCTCTCAGCGCACAATTGCGCCGAGCCGCGAACACAAGAATTGAGGTTGAAGGTAACCTCGCACTTTCCATTGCCAACGATTTACTGTTGGCCTATGGTCAGTCGCCATTTAACTCTGAGGCTGAGTGTATTTCATTCAGCCCGA…
>genotype_45
GGGAACCCCCCTTCGGGGGGTCACCTCGCGCAGCGGGCTGCGCGAAGGAGCCACGCTGCGAAGCAGCGTGGCGGTTCTCGTGCGTCACCGAAACGCACGAAGGTCGCGCCTCTTCACGAGGCGTCACCTGGGAGAGCGCGAAAGCGCTAGCCCGTGCTCTAGCTCTAGCAGGTCTCGAGATCTCCTCTAGAGATAATTTTGTTTAACTCTAAGAAGGAGATATACATATGTCTAAGACAGCATCTTCGCGTAACTCTCTCAGCGCACAATTGCGCCGAGCCGCGAACACAAGAATTGAGGTTGAAGGTAACCTCGCACTTTCCATTGCCAACGATTTACTGTTGGCCTATGGTCAGTCGCCATTTAACTCTGAGGCTGAGTGTATTTCATTCAGCCCGA…
>genotype_46
GGGAACCCCCCTTCGGGGGGTCACCTCGCGCAGCGGGCTGCGCGAAGGAGCCACGCTGCGAAGCAGCGTGGCGGTTCTCGTGCGTCACCGAAACGCACGAAGGTCGCGCCTCTTCACGAGGCGTCACCTGGGAGAGCGCGAAAGCGCTAGCCCGTGCTCTAGCTCTAGCAGGTCTCGAGATCTCCTCTAGAGATAATTTTGTTTAACTCTAAGAAGGAGATATACATATGTCTAAGACAGCATCTTCGCGTAACTCTCTCAGCGCACAATTGCGCCGAGCCGCGAACACAAGAATTGAGGTTGAAGGTAACCTCGCACTTTCCATTGCCAACGATTTACTGTTGGCCTATGGTCAGTCGCCATTTAACTCTGAGGCTGAGTGTATTTCATTCAGCCCGA…
>genotype_47
GGGAACCCCCCTTCGGGGGGTCACCTCGCGCAGCGGGCTGCGCGAAGGAGCCACGCTGCGAAGCAGCGTGGCGGTTCTCGTGCGTCACCGAAACGCACGAAGGTCGCGCCTCTTCACGAGGCGTCACCTGGGAGAGCGCGAAAGCGCTAGCCCGTGCTCTAGCTCTAGCAGGTCTCGAGATCTCCTCTAGAGATAATTTTGTTTAACTCTAAGAAGGAGATATACATATGTCTAAGACAGCATCTTCGCGTAACTCTCTCAGCGCACAATTGCGCCGAGCCGCGAACACAAGAATTGAGGTTGAAGGTAACCTCGCACTTTCCATTGCCAACGATTTACTGTTGGCCTATGGTCAGTCGCCATTTAACTCTGAGGCTGAGTGTATTTCATTCAGCCCGA…
>genotype_48
GGGAACCCCCCTTCGGGGGGTCACCTCGCGCAGCGGGCTGCGCGAAGGAGCCACGCTGCGAAGCAGCGTGGCGGTTCTCGTGCGTCACCGAAACGCACGAAGGTCGCGCCTCTTCACGAGGCGTCACCTGGGAGAGCGCGAAAGCGCTAGCCCGTGCTCTAGCTCTAGCAGGTCTCGAGATCTCCTCTAGAGATAATTTTGTTTAACTCTAAGAAGGAGATATACATATGTCTAAGACAGCATCTTCGCGTAACTCTCTCAGCGCACAATTGCGCCGAGCCGCGAACACAAGAATTGAGGTTGAAGGTAACCTCGCACTTTCCATTGCCAACGATTTACTGTTGGCCTATGGTCAGTCGCCATTTAACTCTGAGGCTGAGTGTATTTCATTCAGCCCGA…
>genotype_49
GGGAACCCCCCTTCGGGGGGTCACCTCGCGCAGCGGGCTGCGCGAAGGAGCCACGCTGCGAAGCAGCGTGGCGGTTCTCGTGCGTCACCGAAACGCACGAAGGTCGCGCCTCTTCACGAGGCGTCACCTGGGAGAGCGCGAAAGCGCTAGCCCGTGCTCTAGCTCTAGCAGGTCTCGAGATCTCCTCTAGAGATAATTTTGTTTAACTCTAAGAAGGAGATATACATATGTCTAAGACAGCATCTTCGCGTAACTCTCTCAGCGCACAATTGCGCCGAGCCGCGAACACAAGAATTGAGGTTGAAGGTAACCTCGCACTTTCCATTGCCAACGATTTACTGTTGGCCTATGGTCAGTCGCCATTTAACTCTGAGGCTGAGTGTATTTCATTCAGCCCGA…
>genotype_50
GGGAACCCCCCTTCGGGGGGTCACCTCGCGCAGCGGGCTGCGCGAAGGAGCCACGCTGCGAAGCAGCGTGGCGGTTCTCGTGCGTCACCGAAACGCACGAAGGTCGCGCCTCTTCACGAGGCGTCACCTGGGAGAGCGCGAAAGCGCTAGCCCGTGCTCTAGCTCTAGCAGGTCTCGAGATCTCCTCTAGAGATAATTTTGTTTAACTCTAAGAAGGAGATATACATATGTCTAAGACAGCATCTTCGCGTAACTCTCTCAGCGCACAATTGCGCCGAGCCGCGAACACAAGAATTGAGGTTGAAGGTAACCTCGCACTTTCCATTGCCAACGATTTACTGTTGGCCTATGGTCAGTCGCCATTTAACTCTGAGGCTGAGTGTATTTCATTCAGCCCGA…
>genotype_51
GGGAACCCCCCTTCGGGGGGTCACCTCGCGCAGCGGGCTGCGCGAAGGAGCCACGCTGCGAAGCAGCGTGGCGGTTCTCGTGCGTCACCGAAACGCACGAAGGTCGCGCCTCTTCACGAGGCGTCACCTGGGAGAGCGCGAAAGCGCTAGCCCGTGCTCTAGCTCTAGCAGGTCTCGAGATCTCCTCTAGAGATAATTTTGTTTAACTCTAAGAAGGAGATATACATATGTCTAAGACAGCATCTTCGCGTAACTCTCTCAGCGCACAATTGCGCCGAGCCGCGAACACAAGAATTGAGGTTGAAGGTAACCTCGCACTTTCCATTGCCAACGATTTACTGTTGGCCTATGGTCAGTCGCCATTTAACTCTGAGGCTGAGTGTATTTCATTCAGCCCGA…
>genotype_52
GGGAACCCCCCTTCGGGGGGTCACCTCGCGCAGCGGGCTGCGCGAAGGAGCCACGCTGCGAAGCAGCGTGGCGGTTCTCGTGCGTCACCGAAACGCACGAAGGTCGCGCCTCTTCACGAGGCGTCACCTGGGAGAGCGCGAAAGCGCTAGCCCGTGCTCTAGCTCTAGCAGGTCTCGAGATCTCCTCTAGAGATAATTTTGTTTAACTCTAAGAAGGAGATATACATATGTCTAAGACAGCATCTTCGCGTAACTCTCTCAGCGCACAATTGCGCCGAGCCGCGAACACAAGAATTGAGGTTGAAGGTAACCTCGCACTTTCCATTGCCAACGATTTACTGTTGGCCTATGGTCAGTCGCCATTTAACTCTGAGGCTGAGTGTATTTCATTCAGCCCGA…
>genotype_53
GGGAACCCCCCTTCGGGGGGTCACCTCGCGCAGCGGGCTGCGCGAAGGAGCCACGCTGCGAAGCAGCGTGGCGGTTCTCGTGCGTCACCGAAACGCACGAAGGTCGCGCCTCTTCACGAGGCGTCACCTGGGAGAGCGCGAAAGCGCTAGCCCGTGCTCTAGCTCTAGCAGGTCTCGAGATCTCCTCTAGAGATAATTTTGTTTAACTCTAAGAAGGAGATATACATATGTCTAAGACAGCATCTTCGCGTAACTCTCTCAGCGCACAATTGCGCCGAGCCGCGAACACAAGAATTGAGGTTGAAGGTAACCTCGCACTTTCCATTGCCAACGATTTACTGTTGGCCTATGGTCAGTCGCCATTTAACTCTGAGGCTGAGTGTATTTCATTCAGCCCGA…
>genotype_54
GGGAACCCCCCTTCGGGGGGTCACCTCGCGCAGCGGGCTGCGCGAAGGAGCCACGCTGCGAAGCAGCGTGGCGGTTCTCGTGCGTCACCGAAACGCACGAAGGTCGCGCCTCTTCACGAGGCGTCACCTGGGAGAGCGCGAAAGCGCTAGCCCGTGCTCTAGCTCTAGCAGGTCTCGAGATCTCCTCTAGAGATAATTTTGTTTAACTCTAAGAAGGAGATATACATATGTCTAAGACAGCATCTTCGCGTAACTCTCTCAGCGCACAATTGCGCCGAGCCGCGAACACAAGAATTGAGGTTGAAGGTAACCTCGCACTTTCCATTGCCAACGATTTACTGTTGGCCTATGGTCAGTCGCCATTTAACTCTGAGGCTGAGTGTATTTCATTCAGCCCGA…
>genotype_55
GGGAACCCCCCTTCGGGGGGTCACCTCGCGCAGCGGGCTGCGCGAAGGAGCCACGCTGCGAAGCAGCGTGGCGGTTCTCGTGCGTCACCGAAACGCACGAAGGTCGCGCCTCTTCACGAGGCGTCACCTGGGAGAGCGCGAAAGCGCTAGCCCGTGCTCTAGCTCTAGCAGGTCTCGAGATCTCCTCTAGAGATAATTTTGTTTAACTCTAAGAAGGAGATATACATATGTCTAAGACAGCATCTTCGCGTAACTCTCTCAGCGCACAATTGCGCCGAGCCGCGAACACAAGAATTGAGGTTGAAGGTAACCTCGCACTTTCCATTGCCAACGATTTACTGTTGGCCTATGGTCAGTCGCCATTTAACTCTGAGGCTGAGTGTATTTCATTCAGCCCGA…
>genotype_56
GGGAACCCCCCTTCGGGGGGTCACCTCGCGCAGCGGGCTGCGCGAAGGAGCCACGCTGCGAAGCAGCGTGGCGGTTCTCGTGCGTCACCGAAACGCACGAAGGTCGCGCCTCTTCACGAGGCGTCACCTGGGAGAGCGCGAAAGCGCTAGCCCGTGCTCTAGCTCTAGCAGGTCTCGAGATCTCCTCTAGAGATAATTTTGTTTAACTCTAAGAAGGAGATATACATATGTCTAAGACAGCATCTTCGCGTAACTCTCTCAGCGCACAATTGCGCCGAGCCGCGAACACAAGAATTGAGGTTGAAGGTAACCTCGCACTTTCCATTGCCAACGATTTACTGTTGGCCTATGGTCAGTCGCCATTTAACTCTGAGGCTGAGTGTATTTCATTCAGCCCGA…
>genotype_57
GGGAACCCCCCTTCGGGGGGTCACCTCGCGCAGCGGGCTGCGCGAAGGAGCCACGCTGCGAAGCAGCGTGGCGGTTCTCGTGCGTCACCGAAACGCACGAAGGTCGCGCCTCTTCACGAGGCGTCACCTGGGAGAGCGCGAAAGCGCTAGCCCGTGCTCTAGCTCTAGCAGGTCTCGAGATCTCCTCTAGAGATAATTTTGTTTAACTCTAAGAAGGAGATATACATATGTCTAAGACAGCATCTTCGCGTAACTCTCTCAGCGCACAATTGCGCCGAGCCGCGAACACAAGAATTGAGGTTGAAGGTAACCTCGCACTTTCCATTGCCAACGATTTACTGTTGGCCTATGGTCAGTCGCCATTTAACTCTGAGGCTGAGTGTATTTCATTCAGCCCGA…
>genotype_58
GGGAACCCCCCTTCGGGGGGTCACCTCGCGCAGCGGGCTGCGCGAAGGAGCCACGCTGCGAAGCAGCGTGGCGGTTCTCGTGCGTCACCGAAACGCACGAAGGTCGCGCCTCTTCACGAGGCGTCACCTGGGAGAGCGCGAAAGCGCTAGCCCGTGCTCTAGCTCTAGCAGGTCTCGAGATCTCCTCTAGAGATAATTTTGTTTAACTCTAAGAAGGAGATATACATATGTCTAAGACAGCATCTTCGCGTAACTCTCTCAGCGCACAATTGCGCCGAGCCGCGAACACAAGAATTGAGGTTGAAGGTAACCTCGCACTTTCCATTGCCAACGATTTACTGTTGGCCTATGGTCAGTCGCCATTTAACTCTGAGGCTGAGTGTATTTCATTCAGCCCGA…
>genotype_59
GGGAACCCCCCTTCGGGGGGTCACCTCGCGCAGCGGGCTGCGCGAAGGAGCCACGCTGCGAAGCAGCGTGGCGGTTCTCGTGCGTCACCGAAACGCACGAAGGTCGCGCCTCTTCACGAGGCGTCACCTGGGAGAGCGCGAAAGCGCTAGCCCGTGCTCTAGCTCTAGCAGGTCTCGAGATCTCCTCTAGAGATAATTTTGTTTAACTCTAAGAAGGAGATATACATATGTCTAAGACAGCATCTTCGCGTAACTCTCTCAGCGCACAATTGCGCCGAGCCGCGAACACAAGAATTGAGGTTGAAGGTAACCTCGCACTTTCCATTGCCAACGATTTACTGTTGGCCTATGGTCAGTCGCCATTTAACTCTGAGGCTGAGTGTATTTCATTCAGCCCGA…
>genotype_60
GGGAACCCCCCTTCGGGGGGTCACCTCGCGCAGCGGGCTGCGCGAAGGAGCCACGCTGCGAAGCAGCGTGGCGGTTCTCGTGCGTCACCGAAACGCACGAAGGTCGCGCCTCTTCACGAGGCGTCACCTGGGAGAGCGCGAAAGCGCTAGCCCGTGCTCTAGCTCTAGCAGGTCTCGAGATCTCCTCTAGAGATAATTTTGTTTAACTCTAAGAAGGAGATATACATATGTCTAAGACAGCATCTTCGCGTAACTCTCTCAGCGCACAATTGCGCCGAGCCGCGAACACAAGAATTGAGGTTGAAGGTAACCTCGCACTTTCCATTGCCAACGATTTACTGTTGGCCTATGGTCAGTCGCCATTTAACTCTGAGGCTGAGTGTATTTCATTCAGCCCGA…
>genotype_61
GGGAACCCCCCTTCGGGGGGTCACCTCGCGCAGCGGGCTGCGCGAAGGAGCCACGCTGCGAAGCAGCGTGGCGGTTCTCGTGCGTCACCGAAACGCACGAAGGTCGCGCCTCTTCACGAGGCGTCACCTGGGAGAGCGCGAAAGCGCTAGCCCGTGCTCTAGCTCTAGCAGGTCTCGAGATCTCCTCTAGAGATAATTTTGTTTAACTCTAAGAAGGAGATATACATATGTCTAAGACAGCATCTTCGCGTAACTCTCTCAGCGCACAATTGCGCCGAGCCGCGAACACAAGAATTGAGGTTGAAGGTAACCTCGCACTTTCCATTGCCAACGATTTACTGTTGGCCTATGGTCAGTCGCCATTTAACTCTGAGGCTGAGTGTATTTCATTCAGCCCGA…
>genotype_62
GGGAACCCCCCTTCGGGGGGTCACCTCGCGCAGCGGGCTGCGCGAAGGAGCCACGCTGCGAAGCAGCGTGGCGGTTCTCGTGCGTCACCGAAACGCACGAAGGTCGCGCCTCTTCACGAGGCGTCACCTGGGAGAGCGCGAAAGCGCTAGCCCGTGCTCTAGCTCTAGCAGGTCTCGAGATCTCCTCTAGAGATAATTTTGTTTAACTCTAAGAAGGAGATATACATATGTCTAAGACAGCATCTTCGCGTAACTCTCTCAGCGCACAATTGCGCCGAGCCGCGAACACAAGAATTGAGGTTGAAGGTAACCTCGCACTTTCCATTGCCAACGATTTACTGTTGGCCTATGGTCAGTCGCCATTTAACTCTGAGGCTGAGTGTATTTCATTCAGCCCGA…
>genotype_63
GGGAACCCCCCTTCGGGGGGTCACCTCGCGCAGCGGGCTGCGCGAAGGAGCCACGCTGCGAAGCAGCGTGGCGGTTCTCGTGCGTCACCGAAACGCACGAAGGTCGCGCCTCTTCACGAGGCGTCACCTGGGAGAGCGCGAAAGCGCTAGCCCGTGCTCTAGCTCTAGCAGGTCTCGAGATCTCCTCTAGAGATAATTTTGTTTAACTCTAAGAAGGAGATATACATATGTCTAAGACAGCATCTTCGCGTAACTCTCTCAGCGCACAATTGCGCCGAGCCGCGAACACAAGAATTGAGGTTGAAGGTAACCTCGCACTTTCCATTGCCAACGATTTACTGTTGGCCTATGGTCAGTCGCCATTTAACTCTGAGGCTGAGTGTATTTCATTCAGCCCGA…
>genotype_64
GGGAACCCCCCTTCGGGGGGTCACCTCGCGCAGCGGGCTGCGCGAAGGAGCCACGCTGCGAAGCAGCGTGGCGGTTCTCGTGCGTCACCGAAACGCACGAAGGTCGCGCCTCTTCACGAGGCGTCACCTGGGAGAGCGCGAAAGCGCTAGCCCGTGCTCTAGCTCTAGCAGGTCTCGAGATCTCCTCTAGAGATAATTTTGTTTAACTCTAAGAAGGAGATATACATATGTCTAAGACAGCATCTTCGCGTAACTCTCTCAGCGCACAATTGCGCCGAGCCGCGAACACAAGAATTGAGGTTGAAGGTAACCTCGCACTTTCCATTGCCAACGATTTACTGTTGGCCTATGGTCAGTCGCCATTTAACTCTGAGGCTGAGTGTATTTCATTCAGCCCGA…
>genotype_65
GGGAACCCCCCTTCGGGGGGTCACCTCGCGCAGCGGGCTGCGCGAAGGAGCCACGCTGCGAAGCAGCGTGGCGGTTCTCGTGCGTCACCGAAACGCACGAAGGTCGCGCCTCTTCACGAGGCGTCACCTGGGAGAGCGCGAAAGCGCTAGCCCGTGCTCTAGCTCTAGCAGGTCTCGAGATCTCCTCTAGAGATAATTTTGTTTAACTCTAAGAAGGAGATATACATATGTCTAAGACAGCATCTTCGCGTAACTCTCTCAGCGCACAATTGCGCCGAGCCGCGAACACAAGAATTGAGGTTGAAGGTAACCTCGCACTTTCCATTGCCAACGATTTACTGTTGGCCTATGGTCAGTCGCCATTTAACTCTGAGGCTGAGTGTATTTCATTCAGCCCGA…
>genotype_66
GGGAACCCCCCTTCGGGGGGTCACCTCGCGCAGCGGGCTGCGCGAAGGAGCCACGCTGCGAAGCAGCGTGGCGGTTCTCGTGCGTCACCGAAACGCACGAAGGTCGCGCCTCTTCACGAGGCGTCACCTGGGAGAGCGCGAAAGCGCTAGCCCGTGCTCTAGCTCTAGCAGGTCTCGAGATCTCCTCTAGAGATAATTTTGTTTAACTCTAAGAAGGAGATATACATATGTCTAAGACAGCATCTTCGCGTAACTCTCTCAGCGCACAATTGCGCCGAGCCGCGAACACAAGAATTGAGGTTGAAGGTAACCTCGCACTTTCCATTGCCAACGATTTACTGTTGGCCTATGGTCAGTCGCCATTTAACTCTGAGGCTGAGTGTATTTCATTCAGCCCGA…
>genotype_67
GGGAACCCCCCTTCGGGGGGTCACCTCGCGCAGCGGGCTGCGCGAAGGAGCCACGCTGCGAAGCAGCGTGGCGGTTCTCGTGCGTCACCGAAACGCACGAAGGTCGCGCCTCTTCACGAGGCGTCACCTGGGAGAGCGCGAAAGCGCTAGCCCGTGCTCTAGCTCTAGCAGGTCTCGAGATCTCCTCTAGAGATAATTTTGTTTAACTCTAAGAAGGAGATATACATATGTCTAAGACAGCATCTTCGCGTAACTCTCTCAGCGCACAATTGCGCCGAGCCGCGAACACAAGAATTGAGGTTGAAGGTAACCTCGCACTTTCCATTGCCAACGATTTACTGTTGGCCTATGGTCAGTCGCCATTTAACTCTGAGGCTGAGTGTATTTCATTCAGCCCGA…
>genotype_68
GGGAACCCCCCTTCGGGGGGTCACCTCGCGCAGCGGGCTGCGCGAAGGAGCCACGCTGCGAAGCAGCGTGGCGGTTCTCGTGCGTCACCGAAACGCACGAAGGTCGCGCCTCTTCACGAGGCGTCACCTGGGAGAGCGCGAAAGCGCTAGCCCGTGCTCTAGCTCTAGCAGGTCTCGAGATCTCCTCTAGAGATAATTTTGTTTAACTCTAAGAAGGAGATATACATATGTCTAAGACAGCATCTTCGCGTAACTCTCTCAGCGCACAATTGCGCCGAGCCGCGAACACAAGAATTGAGGTTGAAGGTAACCTCGCACTTTCCATTGCCAACGATTTACTGTTGGCCTATGGTCAGTCGCCATTTAACTCTGAGGCTGAGTGTATTTCATTCAGCCCGA…
>genotype_69
GGGAACCCCCCTTCGGGGGGTCACCTCGCGCAGCGGGCTGCGCGAAGGAGCCACGCTGCGAAGCAGCGTGGCGGTTCTCGTGCGTCACCGAAACGCACGAAGGTCGCGCCTCTTCACGAGGCGTCACCTGGGAGAGCGCGAAAGCGCTAGCCCGTGCTCTAGCTCTAGCAGGTCTCGAGATCTCCTCTAGAGATAATTTTGTTTAACTCTAAGAAGGAGATATACATATGTCTAAGACAGCATCTTCGCGTAACTCTCTCAGCGCACAATTGCGCCGAGCCGCGAACACAAGAATTGAGGTTGAAGGTAACCTCGCACTTTCCATTGCCAACGATTTACTGTTGGCCTATGGTCAGTCGCCATTTAACTCTGAGGCTGAGTGTATTTCATTCAGCCCGA…
>genotype_70
GGGAACCCCCCTTCGGGGGGTCACCTCGCGCAGCGGGCTGCGCGAAGGAGCCACGCTGCGAAGCAGCGTGGCGGTTCTCGTGCGTCACCGAAACGCACGAAGGTCGCGCCTCTTCACGAGGCGTCACCTGGGAGAGCGCGAAAGCGCTAGCCCGTGCTCTAGCTCTAGCAGGTCTCGAGATCTCCTCTAGAGATAATTTTGTTTAACTCTAAGAAGGAGATATACATATGTCTAAGACAGCATCTTCGCGTAACTCTCTCAGCGCACAATTGCGCCGAGCCGCGAACACAAGAATTGAGGTTGAAGGTAACCTCGCACTTTCCATTGCCAACGATTTACTGTTGGCCTATGGTCAGTCGCCATTTAACTCTGAGGCTGAGTGTATTTCATTCAGCCCGA…
>genotype_71
GGGAACCCCCCTTCGGGGGGTCACCTCGCGCAGCGGGCTGCGCGAAGGAGCCACGCTGCGAAGCAGCGTGGCGGTTCTCGTGCGTCACCGAAACGCACGAAGGTCGCGCCTCTTCACGAGGCGTCACCTGGGAGAGCGCGAAAGCGCTAGCCCGTGCTCTAGCTCTAGCAGGTCTCGAGATCTCCTCTAGAGATAATTTTGTTTAACTCTAAGAAGGAGATATACATATGTCTAAGACAGCATCTTCGCGTAACTCTCTCAGCGCACAATTGCGCCGAGCCGCGAACACAAGAATTGAGGTTGAAGGTAACCTCGCACTTTCCATTGCCAACGATTTACTGTTGGCCTATGGTCAGTCGCCATTTAACTCTGAGGCTGAGTGTATTTCATTCAGCCCGA…
>genotype_72
GGGAACCCCCCTTCGGGGGGTCACCTCGCGCAGCGGGCTGCGCGAAGGAGCCACGCTGCGAAGCAGCGTGGCGGTTCTCGTGCGTCACCGAAACGCACGAAGGTCGCGCCTCTTCACGAGGCGTCACCTGGGAGAGCGCGAAAGCGCTAGCCCGTGCTCTAGCTCTAGCAGGTCTCGAGATCTCCTCTAGAGATAATTTTGTTTAACTCTAAGAAGGAGATATACATATGTCTAAGACAGCATCTTCGCGTAACTCTCTCAGCGCACAATTGCGCCGAGCCGCGAACACAAGAATTGAGGTTGAAGGTAACCTCGCACTTTCCATTGCCAACGATTTACTGTTGGCCTATGGTCAGTCGCCATTTAACTCTGAGGCTGAGTGTATTTCATTCAGCCCGA…
>genotype_73
GGGAACCCCCCTTCGGGGGGTCACCTCGCGCAGCGGGCTGCGCGAAGGAGCCACGCTGCGAAGCAGCGTGGCGGTTCTCGTGCGTCACCGAAACGCACGAAGGTCGCGCCTCTTCACGAGGCGTCACCTGGGAGAGCGCGAAAGCGCTAGCCCGTGCTCTAGCTCTAGCAGGTCTCGAGATCTCCTCTAGAGATAATTTTGTTTAACTCTAAGAAGGAGATATACATATGTCTAAGACAGCATCTTCGCGTAACTCTCTCAGCGCACAATTGCGCCGAGCCGCGAACACAAGAATTGAGGTTGAAGGTAACCTCGCACTTTCCATTGCCAACGATTTACTGTTGGCCTATGGTCAGTCGCCATTTAACTCTGAGGCTGAGTGTATTTCATTCAGCCCGA…
>genotype_74
GGGAACCCCCCTTCGGGGGGTCACCTCGCGCAGCGGGCTGCGCGAAGGAGCCACGCTGCGAAGCAGCGTGGCGGTTCTCGTGCGTCACCGAAACGCACGAAGGTCGCGCCTCTTCACGAGGCGTCACCTGGGAGAGCGCGAAAGCGCTAGCCCGTGCTCTAGCTCTAGCAGGTCTCGAGATCTCCTCTAGAGATAATTTTGTTTAACTCTAAGAAGGAGATATACATATGTCTAAGACAGCATCTTCGCGTAACTCTCTCAGCGCACAATTGCGCCGAGCCGCGAACACAAGAATTGAGGTTGAAGGTAACCTCGCACTTTCCATTGCCAACGATTTACTGTTGGCCTATGGTCAGTCGCCATTTAACTCTGAGGCTGAGTGTATTTCATTCAGCCCGA…
>genotype_75
GGGAACCCCCCTTCGGGGGGTCACCTCGCGCAGCGGGCTGCGCGAAGGAGCCACGCTGCGAAGCAGCGTGGCGGTTCTCGTGCGTCACCGAAACGCACGAAGGTCGCGCCTCTTCACGAGGCGTCACCTGGGAGAGCGCGAAAGCGCTAGCCCGTGCTCTAGCTCTAGCAGGTCTCGAGATCTCCTCTAGAGATAATTTTGTTTAACTCTAAGAAGGAGATATACATATGTCTAAGACAGCATCTTCGCGTAACTCTCTCAGCGCACAATTGCGCCGAGCCGCGAACACAAGAATTGAGGTTGAAGGTAACCTCGCACTTTCCATTGCCAACGATTTACTGTTGGCCTATGGTCAGTCGCCATTTAACTCTGAGGCTGAGTGTATTTCATTCAGCCCGA…
>genotype_76
GGGAACCCCCCTTCGGGGGGTCACCTCGCGCAGCGGGCTGCGCGAAGGAGCCACGCTGCGAAGCAGCGTGGCGGTTCTCGTGCGTCACCGAAACGCACGAAGGTCGCGCCTCTTCACGAGGCGTCACCTGGGAGAGCGCGAAAGCGCTAGCCCGTGCTCTAGCTCTAGCAGGTCTCGAGATCTCCTCTAGAGATAATTTTGTTTAACTCTAAGAAGGAGATATACATATGTCTAAGACAGCATCTTCGCGTAACTCTCTCAGCGCACAATTGCGCCGAGCCGCGAACACAAGAATTGAGGTTGAAGGTAACCTCGCACTTTCCATTGCCAACGATTTACTGTTGGCCTATGGTCAGTCGCCATTTAACTCTGAGGCTGAGTGTATTTCATTCAGCCCGA…
>genotype_77
GGGAACCCCCCTTCGGGGGGTCACCTCGCGCAGCGGGCTGCGCGAAGGAGCCACGCTGCGAAGCAGCGTGGCGGTTCTCGTGCGTCACCGAAACGCACGAAGGTCGCGCCTCTTCACGAGGCGTCACCTGGGAGAGCGCGAAAGCGCTAGCCCGTGCTCTAGCTCTAGTAGGTCTCGAGATCTCCTCTAGAGATAATTTTGTTTAACTCTAAGAAGGAGATATACATATGTCTAAGACAGCATCTTCGCGTAACTCTCTCAGCGCACAATTGCGCCGAGCCGCGAACACAAGAATTGAGGTTGAAGGTAACCTCGCACTTTCCATTGCCAACGATTTACTGTTGGCCTATGGTCAGTCGCCATTTAACTCTGAGGCTGAGTGTATTTCATTCAGCCCGA…
>genotype_78
GGGAACCCCCCTTCGGGGGGTCACCTCGCGCAGCGGGCTGCGCGAAGGAGCCACGCTGCGAAGCAGCGTGGCGGTTCTCGTGCGTCACCGAAACGCACGAAGGTCGCGCCTCTTCACGAGGCGTCACCTGGGAGAGCGCGAAAGCGCTAGCCCGTGCTCTAGCTCTAGCAGGTCTCGAGATCTCCTCTAGAGATAATTTTGTTTAACTCTAAGAAGGAGATATACATATGTCTAAGACAGCATCTTCGCGTAACTCTCTCAGCGCACAATTGCGCCGAGCCGCGAACACAAGAATTGAGGTTGAAGGTAACCTCGCACTTTCCATTGCCAACGATTTACTGTTGGCCTATGGTCAGTCGCCATTTAACTCTGAGGCTGAGTGTATTTCATTCAGCCCGA…
>genotype_79
GGGAACCCCCCTTCGGGGGGTCACCTCGCGCAGCGGGCTGCGCGAAGGAGCCACGCTGCGAAGCAGCGTGGCGGTTCTCGTGCGTCACCGAAACGCACGAAGGTCGCGCCTCTTCACGAGGCGTCACCTGGGAGAGCGCGAAAGCGCTAGCCCGTGCTCTAGCTCTAGCAGGTCTCGAGATCTCCTCTAGAGATAATTTTGTTTAACTCTAAGAAGGAGATATACATATGTCTAAGACAGCATCTTCGCGTAACTCTCTCAGCGCACAATTGCGCCGAGCCGCGAACACAAGAATTGAGGTTGAAGGTAACCTCGCACTTTCCATTGCCAACGATTTACTGTTGGCCTATGGTCAGTCGCCATTTAACTCTGAGGCTGAGTGTATTTCATTCAGCCCGA…
>genotype_80
GGGAACCCCCCTTCGGGGGGTCACCTCGCGCAGCGGGCTGCGCGAAGGAGCCACGCTGCGAAGCAGCGTGGCGGTTCTCGTGCGTCACCGAAACGCACGAAGGTCGCGCCTCTTCACGAGGCGTCACCTGGGAGAGCGCGAAAGCGCTAGCCCGTGCTCTAGCTCTAGTAGGTCTCGAGATCTCCTCTAGAGATAATTTTGTTTAACTCTAAGAAGGAGATATACATATGTCTAAGACAGCATCTTCGCGTAACTCTCTCAGCGCACAATTGCGCCGAGCCGCGAACACAAGAATTGAGGTTGAAGGTAACCTCGCACTTTCCATTGCCAACGATTTACTGTTGGCCTATGGTCAGTCGCCATTTAACTCTGAGGCTGAGTGTATTTCATTCAGCCCGA…
>genotype_81
GGGAACCCCCCTTCGGGGGGTCACCTCGCGCAGCGGGCTGCGCGAAGGAGCCACGCTGCGAAGCAGCGTGGCGGTTCTCGTGCGTCACCGAAACGCACGAAGGTCGCGCCTCTTCACGAGGCGTCACCTGGGAGAGCGCGAAAGCGCTAGCCCGTGCTCTAGCTCTAGCAGGTCTCGAGATCTCCTCTAGAGATAATTTTGTTTAACTCTAAGAAGGAGATATACATATGTCTAAGACAGCATCTTCGCGTAACTCTCTCAGCGCACAATTGCGCCGAGCCGCGAACACAAGAATTGAGGTTGAAGGTAACCTCGCACTTTCCATTGCCAACGATTTACTGTTGGCCTATGGTCAGTCGCCATTTAACTCTGAGGCTGAGTGTATTTCATTCAGCCCGA…
>genotype_82
GGGAACCCCCCTTCGGGGGGTCACCTCGCGCAGCGGGCTGCGCGAAGGAGCCACGCTGCGAAGCAGCGTGGCGGTTCTCGTGCGTCACCGAAACGCACGAAGGTCGCGCCTCTTCACGAGGCGTCACCTGGGAGAGCGCGAAAGCGCTAGCCCGTGCTCTAGCTCTAGTAGGTCTCGAGATCTCCTCTAGAGATAATTTTGTTTAACTCTAAGAAGGAGATATACATATGTCTAAGACAGCATCTTCGCGTAACTCTCTCAGCGCACAATTGCGCCGAGCCGCGAACACAAGAATTGAGGTTGAAGGTAACCTCGCACTTTCCATTGCCAACGATTTACTGTTGGCCTATGGTCAGTCGCCATTTAACTCTGAGGCTGAGTGTATTTCATTCAGCCCGA…
>genotype_83
GGGAACCCCCCTTCGGGGGGTCACCTCGCGCAGCGGGCTGCGCGAAGGAGCCACGCTGCGAAGCAGCGTGGCGGTTCTCGTGCGTCACCGAAACGCACGAAGGTCGCGCCTCTTCACGAGGCGTCACCTGGGAGAGCGCGAAAGCGCTAGCCCGTGCTCTAGCTCTAGCAGGTCTCGAGATCTCCTCTAGAGATAATTTTGTTTAACTCTAAGAAGGAGATATACATATGTCTAAGACAGCATCTTCGCGTAACTCTCTCAGCGCACAATTGCGCCGAGCCGCGAACACAAGAATTGAGGTTGAAGGTAACCTCGCACTTTCCATTGCCAACGATTTACTGTTGGCCTATGGTCAGTCGCCATTTAACTCTGAGGCTGAGTGTATTTCATTCAGCCCGA…
>genotype_84
GGGAACCCCCCTTCGGGGGGTCACCTCGCGCAGCGGGCTGCGCGAAGGAGCCACGCTGCGAAGCAGCGTGGCGGTTCTCGTGCGTCACCGAAACGCACGAAGGTCGCGCCTCTTCACGAGGCGTCACCTGGGAGAGCGCGAAAGCGCTAGCCCGTGCTCTAGCTCTAGTAGGTCTCGAGATCTCCTCTAGAGATAATTTTGTTTAACTCTAAGAAGGAGATATACATATGTCTAAGACAGCATCTTCGCGTAACTCTCTCAGCGCACAATTGCGCCGAGCCGCGAACACAAGAATTGAGGTTGAAGGTAACCTCGCACTTTCCATTGCCAACGATTTACTGTTGGCCTATGGTCAGTCGCCATTTAACTCTGAGGCTGAGTGTATTTCATTCAGCCCGA…
>genotype_85
GGGAACCCCCCTTCGGGGGGTCACCTCGCGCAGCGGGCTGCGCGAAGGAGCCACGCTGCGAAGCAGCGTGGCGGTTCTCGTGCGTCACCGAAACGCACGAAGGTCGCGCCTCTTCACGAGGCGTCACCTGGGAGAGCGCGAAAGCGCTAGCCCGTGCTCTAGCTCTAGTAGGTCTCGAGATCTCCTCTAGAGATAATTTTGTTTAACTCTAAGAAGGAGATATACATATGTCTAAGACAGCATCTTCGCGTAACTCTCTCAGCGCACAATTGCGCCGAGCCGCGAACACAAGAATTGAGGTTGAAGGTAACCTCGCACTTTCCATTGCCAACGATTTACTGTTGGCCTATGGTCAGTCGCCATTTAACTCTGAGGCTGAGTGTATTTCATTCAGCCCGA…
>genotype_86
GGGAACCCCCCTTCGGGGGGTCACCTCGCGCAGCGGGCTGCGCGAAGGAGCCACGCTGCGAAGCAGCGTGGCGGTTCTCGTGCGTCACCGAAACGCACGAAGGTCGCGCCTCTTCACGAGGCGTCACCTGGGAGAGCGCGAAAGCGCTAGCCCGTGCTCTAGCTCTAGTAGGTCTCGAGATCTCCTCTAGAGATAATTTTGTTTAACTCTAAGAAGGAGATATACATATGTCTAAGACAGCATCTTCGCGTAACTCTCTCAGCGCACAATTGCGCCGAGCCGCGAACACAAGAATTGAGGTTGAAGGTAACCTCGCACTTTCCATTGCCAACGATTTACTGTTGGCCTATGGTCAGTCGCCATTTAACTCTGAGGCTGAGTGTATTTCATTCAGCCCGA…
>genotype_87
GGGAACCCCCCTTCGGGGGGTCACCTCGCGCAGCGGGCTGCGCGAAGGAGCCACGCTGCGAAGCAGCGTGGCGGTTCTCGTGCGTCACCGAAACGCACGAAGGTCGCGCCTCTTCACGAGGCGTCACCTGGGAGAGCGCGAAAGCGCTAGCCCGTGCTCTAGCTCTAGCAGGTCTCGAGATCTCCTCTAGAGATAATTTTGTTTAACTCTAAGAAGGAGATATACATATGTCTAAGACAGCATCTTCGCGTAACTCTCTCAGCGCACAATTGCGCCGAGCCGCGAACACAAGAATTGAGGTTGAAGGTAACCTCGCACTTTCCATTGCCAACGATTTACTGTTGGCCTATGGTCAGTCGCCATTTAACTCTGAGGCTGAGTGTATTTCATTCAGCCCGA…
>genotype_88
GGGAACCCCCCTTCGGGGGGTCACCTCGCGCAGCGGGCTGCGCGAAGGAGCCACGCTGCGAAGCAGCGTGGCGGTTCTCGTGCGTCACCGAAACGCACGAAGGTCGCGCCTCTTCACGAGGCGTCACCTGGGAGAGCGCGAAAGCGCTAGCCCGTGCTCTAGCTCTAGTAGGTCTCGAGATCTCCTCTAGAGATAATTTTGTTTAACTCTAAGAAGGAGATATACATATGTCTAAGACAGCATCTTCGCGTAACTCTCTCAGCGCACAATTGCGCCGAGCCGCGAACACAAGAATTGAGGTTGAAGGTAACCTCGCACTTTCCATTGCCAACGATTTACTGTTGGCCTATGGTCAGTCGCCATTTAACTCTGAGGCTGAGTGTATTTCATTCAGCCCGA…
>genotype_89
GGGAACCCCCCTTCGGGGGGTCACCTCGCGCAGCGGGCTGCGCGAAGGAGCCACGCTGCGAAGCAGCGTGGCGGTTCTCGTGCGTCACCGAAACGCACGAAGGTCGCGCCTCTTCACGAGGCGTCACCTGGGAGAGCGCGAAAGCGCTAGCCCGTGCTCTAGCTCTAGTAGGTCTCGAGATCTCCTCTAGAGATAATTTTGTTTAACTCTAAGAAGGAGATATACATATGTCTAAGACAGCATCTTCGCGTAACTCTCTCAGCGCACAATTGCGCCGAGCCGCGAACACAAGAATTGAGGTTGAAGGTAACCTCGCACTTTCCATTGCCAACGATTTACTGTTGGCCTATGGTCAGTCGCCATTTAACTCTGAGGCTGAGTGTATTTCATTCAGCCCGA…
>genotype_90
GGGAACCCCCCTTCGGGGGGTCACCTCGCGCAGCGGGCTGCGCGAAGGAGCCACGCTGCGAAGCAGCGTGGCGGTTCTCGTGCGTCACCGAAACGCACGAAGGTCGCGCCTCTTCACGAGGCGTCACCTGGGAGAGCGCGAAAGCGCTAGCCCGTGCTCTAGCTCTAGTAGGTCTCGAGATCTCCTCTAGAGATAATTTTGTTTAACTCTAAGAAGGAGATATACATATGTCTAAGACAGCATCTTCGCGTAACTCTCTCAGCGCACAATTGCGCCGAGCCGCGAACACAAGAATTGAGGTTGAAGGTAACCTCGCACTTTCCATTGCCAACGATTTACTGTTGGCCTATGGTCAGTCGCCATTTAACTCTGAGGCTGAGTGTATTTCATTCAGCCCGA…
>genotype_91
GGGAACCCCCCTTCGGGGGGTCACCTCGCGCAGCGGGCTGCGCGAAGGAGCCACGCTGCGAAGCAGCGTGGCGGTTCTCGTGCGTCACCGAAACGCACGAAGGTCGCGCCTCTTCACGAGGCGTCACCTGGGAGAGCGCGAAAGCGCTAGCCCGTGCTCTAGCTCTAGTAGGTCTCGAGATCTCCTCTAGAGATAATTTTGTTTAACTCTAAGAAGGAGATATACATATGTCTAAGACAGCATCTTCGCGTAACTCTCTCAGCGCACAATTGCGCCGAGCCGCGAACACAAGAATTGAGGTTGAAGGTAACCTCGCACTTTCCATTGCCAACGATTTACTGTTGGCCTATGGTCAGTCGCCATTTAACTCTGAGGCTGAGTGTATTTCATTCAGCCCGA…

## Sheet: Primers
Primer 1	GCTGCCTAAACAGCTGCAAC
Primer 2	GATCCACCCGCGGTTTTTC
Primer 3	CGTACGGGAGTTCGACCGTG
Primer 4	AAAGCGCTAGCCCGTGCTCTAGC

## Sheet: Data analysis
Raw mutation frequencies																									After subtracting the background mutational frequencies																			Histgrams of frequencies
Frequencies of each mutation (nucleotide after mutation:the position number of the nucleotide)	Before replication-1	Before replication-2	Before replication-3	Before replication-4	Before replication-5	Averaged background mutation frequencies		genotype_01-1	genotype_01-2	genotype_01-3	genotype_06	genotype_10	genotype_19	genotype_20	genotype_34-1	genotype_34-2	genotype_34-3	genotype_50-1	genotype_50-2	genotype_50-3	genotype_61	genotype_62	genotype_69		Frequencies of each mutation (nucleotide after mutation:the position number of the nucleotide)	genotype_01-1	genotype_01-2	genotype_01-3	genotype_06	genotype_10	genotype_19	genotype_20	genotype_34-1	genotype_34-2	genotype_34-3	genotype_50-1	genotype_50-2	genotype_50-3	genotype_61	genotype_62	genotype_69			Frequencies	genotype_01-1	genotype_01-2	genotype_01-3	genotype_06	genotype_10
T220	9.0546e-05	0.000395257	0	0	0	9.71606e-05		5.72451e-05	0.000124418	0	0	5.99e-05	0	0.000398883	0.000120467	0.000196812	7.55e-05	0.000130773	0.000172008	0.000104794	0.000178715	8.03e-05	0.00016559		T220	0	2.72575e-05	0	0	0	0	0.000301722	2.33064e-05	9.96514e-05	0	3.36124e-05	7.48474e-05	7.6334e-06	8.15544e-05	0	6.84294e-05			0	2458	2313	2607	2600	2523
G220	0.000160971	0.000592885	0.000147798	0.000247801	0.000121996	0.00025429		0.000500894	0.00101608	0.000423012	0.000799254	0.00107771	0.000358744	0.000199442	0.000210818	0.000295217	0.000150966	0.000271605	0.000229345	0.000104794	0.000268073	0.000190723	0.00016559		G220	0.000246604	0.000761791	0.000168722	0.000544964	0.000823425	0.000104454	0	0	4.09269e-05	0	1.73149e-05	0	0	1.37829e-05	0	0			2e-05	727	731	670	634	729
C220	7.04247e-05	0	0	0	0	1.40849e-05		7.15564e-05	9.33136e-05	0.000105753	0.000399627	0.000299365	0	0	0.000110428	9.84e-05	0.000226449	7.04e-05	5.73e-05	0.000157192	8.94e-05	9.03e-05	0		C220	5.74714e-05	7.92286e-05	9.16681e-05	0.000385542	0.00028528	0	0	9.63431e-05	8.43151e-05	0.000212364	5.63151e-05	4.32151e-05	0.000143107	7.53151e-05	7.62151e-05	0			4e-05	487	451	417	483	518
A221	9.02681e-05	0	0	0	0.000119033	4.18602e-05		8.52079e-05	8.22969e-05	0.000103146	0.000129668	0.000177002	0	0	6.02e-05	0	0	0.000100475	0.00011279	5.17e-05	0	0.000170418	0		A221	4.33477e-05	4.04367e-05	6.12858e-05	8.78078e-05	0.000135142	0	0	1.83398e-05	0	0	5.86148e-05	7.09298e-05	9.83978e-06	0	0.000128558	0			6e-05	300	313	311	299	341
G221	3.00894e-05	0.000191534	0	0.000241779	0.000119033	0.000116487		1.42013e-05	1.02871e-05	0.000309438	0.000518672	0	0.000175762	0.000192753	0	0.000386885	0.000444972	4.02e-05	0.000281976	0	0	1e-05	0.000243902		G221	0	0	0.000192951	0.000402185	0	5.92749e-05	7.62659e-05	0	0.000270398	0.000328485	0	0.000165489	0	0	0	0.000127415			8e-05	226	225	223	216	212
C221	0.00093277	0.000766137	0	0.000967118	0.0010713	0.000747465		0.000255624	0.00039091	0.000309438	0.000389004	0.000472004	0.000175762	0.000578258	0.000120322	9.67e-05	0.000148324	0.00020095	0.000169186	5.17e-05	0.000175516	0.000150368	0.000243902		C221	0	0	0	0	0	0	0	0	0	0	0	0	0	0	0	0			0.0001	208	198	180	158	147
T222	6.02876e-05	0	0.000141084	0.000120077	0	6.42897e-05		2.83298e-05	0.000143959	0	0	5.88e-05	0	0	0.000100355	9.62e-05	0	3.02e-05	0.000224555	0.000102987	0	3.01e-05	0		T222	0	7.96692e-05	0	0	0	0	0	3.60653e-05	3.19103e-05	0	0	0.000160265	3.86973e-05	0	0	0			0.00012	175	131	137	144	163
G222	0.000130623	0.000190876	0.000141084	0.000240154	0	0.000140547		0.000864059	0.00116195	0.00164372	0.00154739	0.000823529	0.000960531	0.000190949	0.000792807	0.000961538	0.000961823	0.000633382	0.000785943	0.000875386	0.000700832	0.000913105	0.00137819		G222	0.000723512	0.00102141	0.00150318	0.00140684	0.000682982	0.000819984	5.04016e-05	0.00065226	0.000820991	0.000821276	0.000492835	0.000645396	0.000734839	0.000560285	0.000772558	0.00123764			0.00014	123	126	104	108	133
C222	0	0.000190876	0	0	0	3.81752e-05		0.000155814	0.000215938	0	0	5.88e-05	0	0.000381898	1e-05	0	7.4e-05	7.04e-05	0.000112278	5.15e-05	0	4.01e-05	0.00016214		C222	0.000117639	0.000177763	0	0	2.06248e-05	0	0.000343723	0	0	3.58248e-05	3.22248e-05	7.41028e-05	1.33248e-05	0	1.9248e-06	0.000123965			0.00016	131	148	88	97	99
A223	5.0157e-05	0	0.000278242	0.000118483	0.000232477	0.000135872		5.58956e-05	7.0999e-05	0.000101276	0.000254291	0	0.000345543	0	5.01e-05	0	0.000146767	8.03e-05	5.59e-05	0.000102176	0	7.02e-05	0		A223	0	0	0	0.000118419	0	0.000209671	0	0	0	1.08952e-05	0	0	0	0	0	0			0.00018	114	103	90	89	86
G223	7.02198e-05	0.00392597	0.000139121	0.00189573	0.0030222	0.00181065		5.58956e-05	5.07135e-05	0.00182297	0.00165289	0.000816231	0.00172771	0.00264151	2e-05	0.00133613	0.000807221	4.02e-05	0.00128628	0.000919587	0.00181802	0	0.00168391		G223	0	0	1.232e-05	0	0	0	0.00083086	0	0	0	0	0	0	7.37504e-06	0	0			0.0002	93	99	71	95	86
C223	0.000150471	0.000186951	0	0	0.000116239	9.07322e-05		0.000475112	0.000760703	0.000303828	0.00203433	0.000991138	0.000431928	0.000566038	0.000220514	0.000381752	0	0.000281223	0.000503328	0.000153265	0.000259718	0.000260714	0		C223	0.00038438	0.000669971	0.000213096	0.0019436	0.000900406	0.000341196	0.000475306	0.000129782	0.00029102	0	0.000190491	0.000412596	6.25328e-05	0.000168986	0.000169982	0			0.00022	73	99	67	74	69
A224	0.000130197	0.000184604	0.000238152	0.000235599	0	0.00015771		0.000235782	0.000230576	0.000200682	0.000125992	0.000115882	8.58e-05	0.000374111	0.000170254	0.000189879	0	0.000150371	0.000166908	0.000203479	8.61e-05	0.000150198	0.000159681		A224	7.80714e-05	7.28661e-05	4.29717e-05	0	0	0	0.000216401	1.25437e-05	3.21687e-05	0	0	9.19768e-06	4.57687e-05	0	0	1.97068e-06			0.00024	64	73	73	56	57
T224	0.000250378	0	0.000357228	0	0	0.000121521		3.72287e-05	0.000230576	0	0	0.000115882	8.58e-05	0	9.01e-05	0	7.28e-05	0.000110272	5.56e-05	0	0	0.000110145	0		T224	0	0.000109055	0	0	0	0	0	0	0	0	0	0	0	0	0	0			0.00026	46	63	43	57	50
C224	2.00302e-05	0	0.00583472	0.000235599	0	0.00121807		0.000111686	8.02005e-05	0	0	0	0	0	1e-05	0	0	3.01e-05	0	0	0	0	0		C224	0	0	0	0	0	0	0	0	0	0	0	0	0	0	0	0			0.00028	33	62	46	41	41
A225	0.000130662	0.00036049	0	0.000115929	0	0.000121416		0.000134786	0.000100764	9.84e-05	0.000248478	0.000229766	0.000167546	0	6.02e-05	0.000370405	0	0.000130751	0.000162902	0.000347705	8.39e-05	5.02e-05	7.77e-05		A225	1.33695e-05	0	0	0.000127062	0.00010835	4.61297e-05	0	0	0.000248989	0	9.33471e-06	4.14857e-05	0.000226289	0	0	0			0.0003	31	51	36	34	27
G225	1.0051e-05	0.000180245	0.00471032	0.000115929	0.000113701	0.00102605		4.9013e-05	6.04583e-05	0.000295101	0	0	0	0	0	0	7.12e-05	2.01e-05	5.43e-05	9.93e-05	0	1e-05	0		G225	0	0	0	0	0	0	0	0	0	0	0	0	0	0	0	0			0.00032	20	47	36	36	20
C225	0.000130662	0.000180245	0	0	0	6.21815e-05		0.000477877	0.000987485	0.000491836	0.00161511	0.000804182	0.000251319	0	0.000220892	0.000648208	0.000142328	0.000241386	0.000325804	9.93e-05	0.000335655	0.000200735	0.000544239		C225	0.000415695	0.000925304	0.000429655	0.00155293	0.000742001	0.000189138	0	0.000158711	0.000586027	8.01465e-05	0.000179205	0.000263623	3.71185e-05	0.000273474	0.000138554	0.000482058			0.00034	23	30	26	28	15
A226	2.00387e-05	0	0	0.000114837	0	2.69751e-05		3.65983e-05	2.00646e-05	0	0	5.69e-05	0.000165522	0	2e-05	0	0.000140895	6.02e-05	0	0	8.33e-05	5.01e-05	7.7e-05		A226	9.62317e-06	0	0	0	2.99249e-05	0.000138547	0	0	0	0.00011392	3.32249e-05	0	0	5.63249e-05	2.31249e-05	5.00249e-05			0.00036	17	22	27	21	19
T226	2.00387e-05	0	0	0.000229674	0	4.99425e-05		6.09972e-05	0.000140452	0	0	0	0	0.000353482	6.01e-05	0	0.000140895	7.03e-05	0.000161586	0.000147965	0	8.02e-05	0		T226	1.10546e-05	9.05097e-05	0	0	0	0	0.000303539	1.01575e-05	0	9.09525e-05	2.03575e-05	0.000111643	9.80225e-05	0	3.02575e-05	0			0.00038	7	21	20	23	10
G226	0	0.000355556	0	0	0.000111732	9.34576e-05		0	4.01292e-05	0	0	0	0	0	0	0	7.04e-05	3.01e-05	0	0	0	1e-05	7.7e-05		G226	0	0	0	0	0	0	0	0	0	0	0	0	0	0	0	0			0.0004	8	12	16	18	9
A227	5.01635e-05	0	0	0	0.000222074	5.44475e-05		6.09414e-05	5.02679e-05	0	0	0.000283543	0.000164772	0	0.000100237	0	0	4.02e-05	0	0	0	6.02e-05	7.68e-05		A227	6.49392e-06	0	0	0	0.000229095	0.000110324	0	4.57895e-05	0	0	0	0	0	0	5.75249e-06	2.23525e-05			0.00042	5	14	18	12	3
G227	0	0	0	0.000113895	0	2.2779e-05		4.87531e-05	1.00536e-05	0	0	0	0	0	2e-05	0.000182732	0	2.01e-05	0	4.91e-05	0	0	0		G227	2.59741e-05	0	0	0	0	0	0	0	0.000159953	0	0	0	2.6321e-05	0	0	0			0.00044	5	8	14	11	5
C227	0.000180589	0	0.000467891	0.000113895	0.000333111	0.000219097		0.000292519	0.000311661	0	0.000851685	0.00039696	0.000247158	0	0.000250591	0.000182732	0.000140154	0.000170688	0	0	8.27e-05	0.000100267	0.000230326		C227	7.34217e-05	9.2564e-05	0	0.000632588	0.000177863	2.80609e-05	0	3.14939e-05	0	0	0	0	0	0	0	1.12289e-05			0.00046	2	13	10	6	6
T228	0	0	0.00011562	0	0	2.3124e-05		6.02998e-05	3.00448e-05	0	0.000234137	5.56e-05	0	0	3e-05	0	0.000137193	0	0	4.82e-05	0	1e-05	0		T228	3.71758e-05	6.92077e-06	0	0.000211013	3.2476e-05	0	0	6.876e-06	0	0.000114069	0	0	2.5076e-05	0	0	0			0.00048	1	8	7	6	3
G228	0.000170245	0.000166113	0.00323737	0.000330834	0.00074603	0.000930118		0.000397979	0.000560836	0.000281479	0.00152189	0.000777864	0.000877193	0.000674195	0.000190287	0.000355366	0.00020579	0.000260565	0.000210393	0.000337496	0.000481348	0.000300418	0		G228	0	0	0	0.000591774	0	0	0	0	0	0	0	0	0	0	0	0			0.0005	5	8	9	7	4
C228	0	0.000166113	0	0	0.000106576	5.45378e-05		4.82398e-05	1.00149e-05	9.38e-05	0	5.56e-05	0.00015949	0	3e-05	0	0	4.01e-05	0	0.000144641	8.02e-05	1e-05	0		C228	0	0	3.92622e-05	0	1.0622e-06	0.000104952	0	0	0	0	0	0	9.01032e-05	2.56622e-05	0	0			0.00052	3	3	12	4	5
T229	5.00892e-05	0	0.000208073	0.000110546	0	7.37416e-05		5.93986e-05	3.0109e-05	9.15e-05	0.000113058	5.27e-05	0	0	8.02e-05	8.9e-05	6.87e-05	8.03e-05	0.000105341	0.000144739	0	2e-05	0.000298931		T229	0	0	1.77584e-05	3.93166e-05	0	0	0	6.45837e-06	1.52584e-05	0	6.55837e-06	3.15994e-05	7.09974e-05	0	0	0.000225189			0.00054	0	2	5	6	1
G229	6.0107e-05	0.00148933	0.000104037	0.00055273	0.000212834	0.000483807		0.000653385	0.000431562	0.00045754	0.00192199	0.000526537	0.000557236	0.000335514	0.000100204	0.000355999	0.000481133	0.000250961	0.000790056	0.000144739	0.000641797	0.000180415	0.000149466		G229	0.000169578	0	0	0.00143818	4.27302e-05	7.34292e-05	0	0	0	0	0	0.000306249	0	0.00015799	0	0			0.00056	2	5	2	2	3
C229	1.00178e-05	0	0	0	0	2.00357e-06		3.56392e-05	3.0109e-05	0	0.000113058	0	0.000238815	0	5.01e-05	0.000177999	0	4.02e-05	0	0	0	0	0		C229	3.36356e-05	2.81054e-05	0	0.000111055	0	0.000236811	0	4.80964e-05	0.000175995	0	3.81964e-05	0	0	0	0	0			0.00058	3	2	6	4	0
A230	6.0116e-05	0	0.000103907	9.95e-05	0	5.27046e-05		0.000202632	7.0255e-05	7.74e-05	0	0.000136968	7.37e-05	0.00014941	0.000140264	8.3e-05	6.45e-05	6.02e-05	0	0.000227097	0	8.02e-05	0		A230	0.000149927	1.75504e-05	2.46954e-05	0	8.42634e-05	2.09954e-05	9.67054e-05	8.75594e-05	3.02954e-05	1.17954e-05	7.4954e-06	0	0.000174392	0	2.74954e-05	0			0.0006	0	0	2	3	3
T230	5.00967e-05	0	0	0	0	1.00193e-05		5.33242e-05	8.02915e-05	0	9.17515e-05	0	7.37e-05	0	1e-05	8.3e-05	0	3.01e-05	0	4.54e-05	7.45e-05	5.01e-05	0		T230	4.33049e-05	7.02721e-05	0	8.17322e-05	0	6.36807e-05	0	0	7.29807e-05	0	2.00807e-05	0	3.53807e-05	6.44807e-05	4.00807e-05	0			0.00062	1	2	4	2	1
C230	2.00387e-05	0	0	9.95e-05	0	2.39077e-05		2.13297e-05	0	0	0	0	7.37e-05	0	5.01e-05	0	0	7.03e-05	0	0	0	3.01e-05	0.000209746		C230	0	0	0	0	0	4.97923e-05	0	2.61923e-05	0	0	4.63923e-05	0	0	0	6.19227e-06	0.000185838			0.00064	1	1	4	2	0
T231	0.000130302	0.00014243	9.47e-05	0	0.000284981	0.000130483		0.000125869	3.01444e-05	7.55e-05	0	0.000134716	7.13e-05	0.000282406	6.02e-05	8.04e-05	6.22e-05	0.000150807	0.000191058	0.000131573	0.000143308	5.01e-05	0.000134662		T231	0	0	0	0	4.23334e-06	0	0.000151923	0	0	0	2.03243e-05	6.05753e-05	1.09034e-06	1.28253e-05	0	4.17934e-06			0.00066	0	2	1	3	2
G231	5.01163e-05	0.00028486	0.00814703	0.000293399	0.000284981	0.00181208		0.00011538	0.0002713	7.55e-05	0.000443971	0.000134716	0.000285286	0.000423609	0.000240635	0.000160836	0.000186532	0.000221183	4.78e-05	8.77e-05	0.000644884	0.00026073	6.73e-05		G231	0	0	0	0	0	0	0	0	0	0	0	0	0	0	0	0			0.00068	1	1	4	5	0
C231	3.00698e-05	0	0	9.78e-05	0.000189988	6.35716e-05		6.29346e-05	3.01444e-05	7.55e-05	0	0	0.000142643	0	3.01e-05	0	0	4.02e-05	4.78e-05	0	7.17e-05	0	0		C231	0	0	1.19284e-05	0	0	7.90714e-05	0	0	0	0	0	0	0	8.12845e-06	0	0			0.0007	1	1	1	1	2
A232	1.00162e-05	0	0	0	0	2.00325e-06		4.1701e-05	1.00287e-05	0	0	0	0	0	0	0	0.000123564	0	9.52e-05	4.35e-05	7.11e-05	2e-05	0		A232	3.96977e-05	8.02544e-06	0	0	0	0	0	0	0	0.000121561	0	9.31968e-05	4.14968e-05	6.90968e-05	1.79968e-05	0			0.00072	0	0	2	0	0
T232	5.00811e-05	0	0.00018875	0.000194081	0	8.65824e-05		0.000156379	0.000140402	0.000300053	0	8.93e-05	0	0	9.01e-05	7.98e-05	6.18e-05	0.000140375	4.76e-05	0.000261142	0.000284596	0.000120192	0.000200468		T232	6.97963e-05	5.38191e-05	0.000213471	0	2.71757e-06	0	0	3.51757e-06	0	0	5.37926e-05	0	0.00017456	0.000198014	3.36096e-05	0.000113886			0.00074	3	0	4	1	0
G232	0	0	0	0	0	0		1.04252e-05	0	7.5e-05	0.000175377	0	0	0	0	0	0	0	0	0	7.11e-05	8.01e-05	0		G232	1.04252e-05	0	7.5e-05	0.000175377	0	0	0	0	0	0	0	0	0	7.11e-05	8.01e-05	0			0.00076	0	3	1	0	2
T233	7.07378e-05	0.00027185	0	0	0.000183436	0.000105205		8.25806e-05	7.08394e-05	7.33e-05	0.000171762	8.77e-05	6.56e-05	0	0.000120789	7.4e-05	5.73e-05	0.000121185	0.000132837	4.05e-05	6.61e-05	6.05e-05	0.000124595		T233	0	0	0	6.65575e-05	0	0	0	1.55842e-05	0	0	1.59802e-05	2.76322e-05	0	0	0	1.93902e-05			0.00078	0	1	0	1	0
G233	0.000212213	0	9.36e-05	0.000189394	0.000366872	0.000172416		0.00059871	0.000475636	0.000513084	0.000687049	0.00052597	0.000327955	0.000248849	0.000352301	0.000443951	0.000401054	0.000444346	0.000221396	0.000364934	0.000528996	0.000332477	0.000186893		G233	0.000426294	0.00030322	0.000340668	0.000514633	0.000353554	0.000155539	7.64331e-05	0.000179885	0.000271535	0.000228638	0.00027193	4.89801e-05	0.000192518	0.00035658	0.000160061	1.44771e-05			0.0008	0	0	0	0	0
C233	0.000111159	0.000407775	0	0	0	0.000103787		4.12903e-05	3.03598e-05	0.000146595	0.000171762	4.38e-05	6.56e-05	0	6.04e-05	0.000295967	0.000114587	0.000141383	0	0.000121645	0	0.000161201	6.23e-05		C233	0	0	4.28081e-05	6.79754e-05	0	0	0	0	0.00019218	1.08001e-05	3.75961e-05	0	1.78581e-05	0	5.74141e-05	0			0.00082	0	0	1	0	0
A234	0.000150228	0.00013151	0.00018577	0	0	9.35017e-05		0.000245253	0.000380991	0	0	0.000129696	0.000192037	0.000242365	0.00028044	7.26e-05	0.000225251	0.000190568	0.000218436	0.000119933	0.000194856	0.000240382	0		A234	0.000151752	0.000287489	0	0	3.61943e-05	9.85353e-05	0.000148863	0.000186938	0	0.000131749	9.70663e-05	0.000124934	2.64313e-05	0.000101354	0.00014688	0			0.00084	0	1	2	1	1
T234	4.00609e-05	0	0.000278655	0	0	6.37432e-05		4.08756e-05	2.00521e-05	7.16e-05	0	4.32e-05	6.4e-05	0	7.01e-05	0	0	5.01e-05	8.74e-05	0	0	0	0.000122175		T234	0	0	7.85682e-06	0	0	2.56821e-07	0	6.35682e-06	0	0	0	2.36568e-05	0	0	0	5.84318e-05			0.00086	0	0	0	1	0
C234	6.00913e-05	0	0	0	0	1.20183e-05		6.13133e-05	1.00261e-05	0	0	0	0	0	1e-05	0	5.63e-05	4.01e-05	0	0	0	3e-05	6.11e-05		C234	4.92951e-05	0	0	0	0	0	0	0	0	4.42817e-05	2.80817e-05	0	0	0	1.79817e-05	4.90817e-05			0.00088	0	0	0	0	0
A235	0.00015064	0	0	9.17e-05	8.84e-05	6.6148e-05		7.10407e-05	0.00010062	0	8.29119e-05	0	0.000125518	0	3.01e-05	7.17e-05	0	6.03e-05	4.31e-05	3.94e-05	0	2.01e-05	0		A235	4.8927e-06	3.44718e-05	0	1.67638e-05	0	5.937e-05	0	0	5.55196e-06	0	0	0	0	0	0	0			0.0009	0	0	0	0	1
T235	0.000190811	0.000129116	0	0	0.000176788	9.9343e-05		0.000375501	0.000321983	0.000354183	0.000331647	0.000214574	0.000188277	0.000234797	0.000220739	0.000214992	5.54e-05	0.000251385	0.000129193	0.000196974	0.000127251	0.000200715	0.000180169		T235	0.000276158	0.00022264	0.00025484	0.000232304	0.000115231	8.8934e-05	0.000135454	0.000121396	0.000115649	0	0.000152042	2.985e-05	9.7631e-05	2.7908e-05	0.000101372	8.0826e-05			0.00092	0	0	0	0	1
G235	3.0128e-05	0.000129116	0	0	8.84e-05	4.95288e-05		0	2.0124e-05	0	0	0	0.000125518	0.000117398	1e-05	7.17e-05	0.000110889	2.01e-05	4.31e-05	0	0	1e-05	0		G235	0	0	0	0	0	7.59892e-05	6.78692e-05	0	2.21712e-05	6.13602e-05	0	0	0	0	0	0			0.00094	1	1	1	0	1
T236	0.000110182	0.000128568	0	0	0	4.775e-05		0.000273462	0.000120366	0.000211402	0	8.54e-05	0	0.000351576	6.01e-05	0	0.000165599	0.000120407	0.000128777	0.000156764	0.000253582	0.000120208	0		T236	0.000225712	7.2616e-05	0.000163652	0	3.765e-05	0	0.000303826	1.235e-05	0	0.000117849	7.2657e-05	8.1027e-05	0.000109014	0.000205832	7.2458e-05	0			0.00096	0	1	0	1	0
G236	0.000120198	0.000128568	9.21e-05	0.000272876	8.75e-05	0.000140248		0.000486155	0.000631921	0.000634205	0.000247586	0.0003845	0.000311993	0	0.000360627	7.12e-05	0.0001104	0.000301017	0.000214629	0.000117573	6.34e-05	0.000230399	0.00011989		G236	0.000345906	0.000491673	0.000493957	0.000107338	0.000244252	0.000171745	0	0.000220379	0	0	0.000160769	7.43805e-05	0	0	9.01505e-05	0			0.00098	0	0	0	1	0
C236	4.00661e-05	0.000128568	9.21e-05	0	0	5.21468e-05		0.000121539	0.000120366	7.05e-05	0.000165057	4.27e-05	0	0	0.000120209	0.00014246	0.000165599	0.000150509	4.29e-05	3.92e-05	0.000190186	0.00015026	0.000299724		C236	6.93919e-05	6.82191e-05	1.83532e-05	0.000112911	0	0	0	6.80622e-05	9.03132e-05	0.000113452	9.83622e-05	0	0	0.000138039	9.81132e-05	0.000247577			0.001	0	0	0	1	0
A237	6.01775e-05	0	9e-05	0	0	3.00355e-05		0.000100624	6.03458e-05	0	0.00024566	0	0.000122865	0.000114273	7.02e-05	7.02e-05	0	8.04e-05	0.000169614	7.73e-05	6.26e-05	8.02e-05	5.9e-05		A237	7.05884e-05	3.03103e-05	0	0.000215625	0	9.28295e-05	8.42375e-05	4.01645e-05	4.01645e-05	0	5.03645e-05	0.000139578	4.72645e-05	3.25645e-05	5.01645e-05	2.89645e-05			0.00102	0	0	0	0	0
G237	0	0.00025294	0	9.03e-05	8.66e-05	8.5968e-05		3.01872e-05	4.02305e-05	0	0.000163773	0	0.000122865	0.000114273	3.01e-05	0	0.000163693	5.03e-05	4.24e-05	0	6.26e-05	2.01e-05	0.000118057		G237	0	0	0	7.78053e-05	0	3.6897e-05	2.8305e-05	0	0	7.7725e-05	0	0	0	0	0	3.2089e-05			0.00104	0	1	0	0	0
C237	6.01775e-05	0.00025294	0.00179969	9.03e-05	8.66e-05	0.000457942		0.000110686	0.00017098	6.98e-05	0.000409433	4.25e-05	6.14e-05	0.000457091	9.02e-05	0.00014039	0.000109129	0.000110587	8.48e-05	7.73e-05	6.26e-05	0.000150453	0.000118057		C237	0	0	0	0	0	0	0	0	0	0	0	0	0	0	0	0			0.00106	0	0	0	0	0
A238	4.00834e-05	0	0	0	0	8.01667e-06		7.02395e-05	5.01605e-05	0	0	0	0	0	7.01e-05	0	5.41e-05	5.02e-05	0	3.84e-05	0	3.01e-05	0		A238	6.22228e-05	4.21438e-05	0	0	0	0	0	6.20833e-05	0	4.60833e-05	4.21833e-05	0	3.03833e-05	0	2.20833e-05	0			0.00108	0	0	0	1	0
T238	6.01251e-05	0.000124363	0	0	0	3.68976e-05		0.000150513	0.000180578	0	0	8.44e-05	0	0.000112752	7.01e-05	6.97e-05	0	5.02e-05	8.4e-05	3.84e-05	6.19e-05	2e-05	5.85e-05		T238	0.000113616	0.00014368	0	0	4.75024e-05	0	7.58544e-05	3.32024e-05	3.28024e-05	0	1.33024e-05	4.71024e-05	1.50239e-06	2.50024e-05	0	2.16024e-05			0.0011	0	0	0	0	0
G238	0	0	0	0	0	0		2.00684e-05	1.00321e-05	0	0	4.22e-05	0	0	1e-05	0	0	0	0	0	0	4.01e-05	0		G238	2.00684e-05	1.00321e-05	0	0	4.22e-05	0	0	1e-05	0	0	0	0	0	0	4.01e-05	0			0.00112	0	0	0	0	0
A239	4.00846e-05	0	0.000176274	0	0	4.32717e-05		9.02808e-05	6.01902e-05	6.86e-05	0	0	0.000181214	0	3.01e-05	0	0.000107538	6.02e-05	8.36e-05	0	0	3.01e-05	5.8e-05		A239	4.70091e-05	1.69185e-05	2.53283e-05	0	0	0.000137942	0	0	0	6.42663e-05	1.69283e-05	4.03283e-05	0	0	0	1.47283e-05			0.00114	0	0	0	0	0
G239	5.01057e-05	0.000490737	0.00149833	0.000263829	8.46e-05	0.000477519		5.0156e-05	2.00634e-05	0	0.000160231	0.000167792	0.000181214	0.000111807	1e-05	0.000138045	0.000215077	5.02e-05	0	0	0.00030756	1e-05	0		G239	0	0	0	0	0	0	0	0	0	0	0	0	0	0	0	0			0.00116	0	0	0	1	1
C239	0.000280592	0.000122684	0	0.000175886	8.46e-05	0.000132752		0.000381185	0.000441395	0.000205846	0	0.000629221	0.000120809	0.00033542	0.000280581	0.000138045	0.000430154	0.000170604	0.000292459	0.000381039	0.00061512	0.00023047	0.00023214		C239	0.000248433	0.000308642	7.30936e-05	0	0.000496469	0	0.000202668	0.000147829	5.29259e-06	0.000297402	3.78516e-05	0.000159707	0.000248287	0.000482368	9.77176e-05	9.93876e-05			0.00118	1	1	0	0	0
A240	6.02252e-05	0	0	0	0	1.2045e-05		6.02319e-05	4.01905e-05	0	0	3.84e-05	0	0	9.02e-05	0.000124813	9.85e-05	7.03e-05	0	0	0	9.03e-05	0.00010502		A240	4.81868e-05	2.81455e-05	0	0	2.6355e-05	0	0	7.8155e-05	0.000112768	8.6455e-05	5.8255e-05	0	0	0	7.8255e-05	9.2975e-05			0.0012	0	1	0	0	0
G240	1.00375e-05	0.00039475	8.76e-05	7.41e-05	0.000142786	0.000141855		2.00773e-05	2.00953e-05	0	0	7.68e-05	5.46e-05	0.000195027	4.01e-05	0	4.93e-05	3.01e-05	7.61e-05	6.92e-05	0	0	0		G240	0	0	0	0	0	0	5.31723e-05	0	0	0	0	0	0	0	0	0			0.00122	1	0	0	0	0
C240	9.03379e-05	0.000296062	0	0	0	7.728e-05		0.000100386	0.00017081	0.00023902	0.000354685	0.000153681	0.000109129	0.00029254	0.000220576	0.000124813	4.93e-05	6.03e-05	0.000114121	0.000242374	0.000111272	0.000110307	0.00015753		C240	2.31065e-05	9.35297e-05	0.00016174	0.000277405	7.6401e-05	3.1849e-05	0.00021526	0.000143296	4.7533e-05	0	0	3.6841e-05	0.000165094	3.3992e-05	3.3027e-05	8.025e-05			0.00124	0	0	0	0	0
A241	4.00749e-05	0	0.00017234	6.35e-05	6.11e-05	6.7403e-05		8.03164e-05	9.02491e-05	0.000105125	6.31473e-05	0	0	0	3.01e-05	0	4.54e-05	0.000100379	3.5e-05	0	0	4.01e-05	0		A241	1.29135e-05	2.28461e-05	3.7722e-05	0	0	0	0	0	0	0	3.2976e-05	0	0	0	0	0			0.00126	0	0	0	0	0
T241	0.000100187	0	8.62e-05	6.35e-05	0.000183284	8.66343e-05		0.000170672	0.00013036	0.000157687	0.000315736	0	0.00045106	0	0.00018035	0	0.00018148	0.000160607	0.000104862	6.39e-05	0.000307251	0.000120275	0.000145737		T241	8.40382e-05	4.37255e-05	7.10527e-05	0.000229102	0	0.000364426	0	9.37157e-05	0	9.48457e-05	7.39727e-05	1.82277e-05	0	0.000220617	3.36407e-05	5.91027e-05			0.00128	0	1	0	0	0
G241	0.000100187	0	0	6.35e-05	6.11e-05	4.49575e-05		4.01582e-05	0	0	0	0	5.01e-05	0	3.01e-05	0	0	0	3.5e-05	6.39e-05	0	1e-05	0		G241	0	0	0	0	0	5.14253e-06	0	0	0	0	0	0	1.89425e-05	0	0	0			0.0013	0	0	0	0	0
A242	0.000170366	8.13e-05	0	6.24e-05	0.00023988	0.000110789		0.000140516	0.000170554	5.19e-05	0.000187021	6.97e-05	0	8.55e-05	0.000150278	0	0.000134553	0.00013051	0.000207778	0.000126482	5.06e-05	0.000140299	0		A242	2.97264e-05	5.9765e-05	0	7.62315e-05	0	0	0	3.94887e-05	0	2.37637e-05	1.97207e-05	9.69887e-05	1.56927e-05	0	2.95097e-05	0			0.00132	0	0	0	0	1
T242	4.00862e-05	0	0	6.24e-05	0.00011994	4.44852e-05		5.01842e-05	3.00978e-05	0.000103885	0.000124681	0.000104511	0	0	3.01e-05	0.00017096	4.49e-05	5.02e-05	3.46e-05	0	5.06e-05	6.01e-05	4.82e-05		T242	5.69894e-06	0	5.93998e-05	8.01953e-05	6.00258e-05	0	0	0	0.000126475	4.14763e-07	5.71476e-06	0	0	6.11476e-06	1.56148e-05	3.71476e-06			0.00134	0	1	0	0	0
C242	1.00215e-05	0	0	0	0	2.00431e-06		0	3.00978e-05	0	0	0	0	0	1e-05	0	8.97e-05	0	0	0	0	0	0		C242	0	2.80935e-05	0	0	0	0	0	7.99569e-06	0	8.76957e-05	0	0	0	0	0	0			0.00136	0	0	0	0	0
A243	7.01143e-05	0	0	0.00010657	5.08e-05	4.54969e-05		4.01526e-05	6.01914e-05	9.05e-05	0	9.42e-05	4.5e-05	0	6.01e-05	0	8.06e-05	4.01e-05	3.13e-05	8.57e-05	0	0.000110212	4.38e-05		A243	0	1.46946e-05	4.50031e-05	0	4.87031e-05	0	0	1.46031e-05	0	3.51031e-05	0	0	4.02031e-05	0	6.47151e-05	0			0.00138	0	0	1	0	0
T243	0.000160261	6.83e-05	0	0.000479565	0.000203087	0.000182243		0.000170648	0.000170542	0.000362073	0.000272331	0.000156986	0.000134892	0.000222486	0.000210366	0	0.00016116	0.000200702	0.000250666	0.000257069	0.000137476	0.00013025	0.000262663		T243	0	0	0.00017983	9.00885e-05	0	0	4.02434e-05	2.81234e-05	0	0	1.84594e-05	6.84234e-05	7.48264e-05	0	0	8.04204e-05			0.0014	0	0	0	0	0
G243	4.00653e-05	0	8.5e-05	0	0	2.50131e-05		6.02289e-05	3.00957e-05	0	5.44662e-05	0	0	7.42e-05	0	0	8.06e-05	1e-05	0	0	0	1e-05	0		G243	3.52158e-05	5.08264e-06	0	2.94532e-05	0	0	4.91869e-05	0	0	5.55869e-05	0	0	0	0	0	0			0.00142	0	0	0	1	0
A244	0.000170163	0.000125055	0	0	0.000140476	8.71389e-05		0.000170387	0.000300514	0.000169556	0.000253794	0.000118888	0.000169542	0.000207139	0.000120094	0.000194581	0	0.000210404	0.000178322	0.000270168	0.000303543	0.000130144	0.000124543		A244	8.32479e-05	0.000213375	8.24171e-05	0.000166655	3.17491e-05	8.24031e-05	0.00012	3.29551e-05	0.000107442	0	0.000123265	9.11831e-05	0.000183029	0.000216404	4.30051e-05	3.74041e-05			0.00144	0	0	0	1	0
T244	2.00192e-05	0.000187582	0.000247791	0	0	9.10784e-05		9.02048e-05	8.0137e-05	0	5.07588e-05	8.92e-05	0	0.000207139	0	4.86e-05	0	5.01e-05	0.000118881	5.4e-05	0	0	0.000124543		T244	0	0	0	0	0	0	0.000116061	0	0	0	0	2.78026e-05	0	0	0	3.34646e-05			0.00146	0	0	0	0	0
C244	3.00288e-05	0	0	0	0	6.00577e-06		1.00228e-05	0	4.24e-05	0	0	0	0	0	4.86e-05	0	0	2.97e-05	2.7e-05	8.67e-05	2e-05	0		C244	4.01699e-06	0	3.63942e-05	0	0	0	0	0	4.25942e-05	0	0	2.36942e-05	2.09942e-05	8.06942e-05	1.39942e-05	0			0.00148	0	0	0	0	0
A245	4.00428e-05	0	0.000247606	0	0	5.75298e-05		7.01101e-05	9.01208e-05	0	0	0	0	0	1e-05	4.77e-05	0	4.01e-05	0	2.66e-05	8.49e-05	2e-05	8.13e-05		A245	1.25803e-05	3.2591e-05	0	0	0	0	0	0	0	0	0	0	0	2.73702e-05	0	2.37702e-05			0.0015	0	0	0	0	0
G245	3.00321e-05	0	0.000412677	4.83e-05	4.58e-05	0.000107362		1.00157e-05	1.00134e-05	8.3e-05	4.9527e-05	0.000116911	8.29e-05	0.000201898	0	0	7.47e-05	3.01e-05	0.000204858	7.97e-05	0.000339732	1e-05	0.000243843		G245	0	0	0	0	9.54917e-06	0	9.45362e-05	0	0	0	0	9.74962e-05	0	0.00023237	0	0.000136481			0.00152	0	0	2	0	0
C245	0.000130139	0.00018246	0	0.000193209	0.000366032	0.000174368		0.00028044	0.000310416	0.000456545	0.000445743	0.000321506	0.00029024	0.000269197	0.000240219	0.000143048	0.000373413	0.000240416	0.000409716	0.000292398	0.000212332	0.000250278	0.000203202		C245	0.000106072	0.000136048	0.000282177	0.000271375	0.000147138	0.000115872	9.4829e-05	6.5851e-05	0	0.000199045	6.6048e-05	0.000235348	0.00011803	3.7964e-05	7.591e-05	2.8834e-05			0.00154	0	0	0	0	0
T246	2.00162e-05	0.000107043	7.53e-05	0	0	4.04718e-05		0	0	0.000112824	4.47828e-05	0	0	0	1e-05	0	0	0	0	4.92e-05	3.92e-05	2e-05	0		T246	0	0	7.23522e-05	4.31096e-06	0	0	0	0	0	0	0	0	8.72816e-06	0	0	0			0.00156	0	0	0	1	0
G246	0.000130105	0.000214087	0	0.000128877	0.000122689	0.000119152		0.000180231	0.000250223	0.000376081	0.000492611	0.000216421	0.000725191	0	0.000220189	0.000175416	0.000274754	0.000140231	0.000457715	0.000344327	0.000352844	0.000230212	0.000337889		G246	6.1079e-05	0.000131071	0.000256929	0.000373459	9.72693e-05	0.000606039	0	0.000101037	5.62643e-05	0.000155602	2.10793e-05	0.000338563	0.000225175	0.000233692	0.00011106	0.000218737			0.00158	0	1	0	0	0
C246	0	0	0	0	0	0		6.00769e-05	0	0	0	2.71e-05	0	0	1e-05	0	0	0	5.38e-05	0	0	1e-05	0		C246	6.00769e-05	0	0	0	2.71e-05	0	0	1e-05	0	0	0	5.38e-05	0	0	1e-05	0			0.0016	0	0	0	0	0
T247	0.000130129	0	7.38e-05	0.000170904	4.07e-05	8.31066e-05		0.000120225	3.00442e-05	7.49e-05	0.000133109	0.000188598	7.61e-05	0.000241604	0.0001201	0	6.85e-05	9.02e-05	0.000107296	7.35e-05	7.81e-05	0.000120115	0		T247	3.71183e-05	0	0	5.0002e-05	0.000105491	0	0.000158497	3.69934e-05	0	0	7.09343e-06	2.41894e-05	0	0	3.70084e-05	0			0.00162	0	0	0	0	0
G247	0.000130129	5.32e-05	0.000221402	0	0.000162767	0.0001135		0.000350656	0.000270397	0.000412047	0.000133109	0.000323311	0.000152277	0.000241604	0.000200166	0.000218627	0.000239808	7.01e-05	0.000107296	0.00017151	0.000273502	0.000180173	0.000187049		G247	0.000237156	0.000156898	0.000298547	1.9609e-05	0.000209811	3.87774e-05	0.000128104	8.66664e-05	0.000105127	0.000126308	0	0	5.80104e-05	0.000160002	6.66734e-05	7.35494e-05			0.00164	1	0	0	0	0
C247	2.00198e-05	0	7.38e-05	0	0	1.8764e-05		3.00562e-05	1.00147e-05	0	0	0	0	6.04e-05	1e-05	0	6.85e-05	1e-05	2.68e-05	0	3.91e-05	2e-05	0		C247	1.12922e-05	0	0	0	0	0	4.1636e-05	0	0	4.9736e-05	0	8.03604e-06	0	2.0336e-05	1.23604e-06	0			0.00166	0	0	0	0	0
A248	2.00216e-05	5.1e-05	0	4.11e-05	3.93e-05	3.02843e-05		2.00445e-05	3.00499e-05	0	4.27004e-05	0	3.68e-05	5.81e-05	4e-05	0	3.33e-05	6.01e-05	0	2.38e-05	7.58e-05	1e-05	3.63e-05		A248	0	0	0	1.2416e-05	0	6.51568e-06	2.78157e-05	9.71568e-06	0	3.01568e-06	2.98157e-05	0	0	4.55157e-05	0	6.01568e-06			0.00168	0	0	0	0	0
T248	0.000110119	0	7.34e-05	0	7.86e-05	5.24238e-05		0.0001804	0.000150249	3.62e-05	8.54007e-05	0.000130634	0.000220816	0.000116137	9.01e-05	4.25e-05	6.66e-05	7.01e-05	2.61e-05	0.000286028	0.000113744	0.00010012	3.63e-05		T248	0.000127977	9.78256e-05	0	3.2977e-05	7.82102e-05	0.000168392	6.37132e-05	3.76762e-05	0	1.41762e-05	1.76762e-05	0	0.000233604	6.13202e-05	4.76962e-05	0			0.0017	0	0	0	0	0
G248	2.00216e-05	0	0	0	0	4.00432e-06		1.00222e-05	1.00166e-05	0	0	2.61e-05	0	0	3e-05	4.25e-05	0	0	0	0	7.58e-05	1e-05	0		G248	6.01792e-06	6.0123e-06	0	0	2.20957e-05	0	0	2.59957e-05	3.84957e-05	0	0	0	0	7.17957e-05	5.99568e-06	0			0.00172	0	0	0	0	0
A249	8.02625e-05	0.000149194	0.000142837	8.06e-05	3.85e-05	9.82787e-05		0.000110609	0.00014073	7.1e-05	0.000125639	0.000154408	0	5.69e-05	6.02e-05	0.000209837	9.84e-05	6.03e-05	0.000128268	0.000164296	7.47e-05	8.03e-05	0.000107219		A249	1.23308e-05	4.24517e-05	0	2.736e-05	5.61293e-05	0	0	0	0.000111558	1.21308e-07	0	2.99893e-05	6.60173e-05	0	0	8.94031e-06			0.00174	0	0	0	0	0
G249	4.01312e-05	0	7.14e-05	0.00016116	7.7e-05	6.99382e-05		3.01662e-05	4.02087e-05	7.1e-05	4.18796e-05	7.72e-05	0.000108668	0	0	0.000209837	6.56e-05	3.02e-05	5.13e-05	0	7.47e-05	1e-05	0		G249	0	0	1.06175e-06	0	7.26175e-06	3.87298e-05	0	0	0.000139899	0	0	0	0	4.76175e-06	0	0			0.00176	0	0	0	0	0
C249	0.000180591	0.00034812	0	0.000322321	0.000230974	0.000216401		0.000341884	0.000190991	0.000283899	0.000125639	0.000257347	0.000144891	0	0.000230782	4.2e-05	0.000229531	0.000361976	0.000153921	0.000140825	0.00033626	0.00017057	0.000393138		C249	0.000125483	0	6.74979e-05	0	4.09459e-05	0	0	1.43809e-05	0	1.31299e-05	0.000145575	0	0	0.000119859	0	0.000176737			0.00178	0	0	0	0	0
A250	4.00729e-05	0	0.00014038	0	3.79e-05	4.36706e-05		6.01642e-05	4.01043e-05	3.51e-05	0	2.54e-05	3.57e-05	0.000112126	4.01e-05	0	6.47e-05	0	0	2.32e-05	3.69e-05	5.01e-05	3.53e-05		A250	1.64937e-05	0	0	0	0	0	6.84554e-05	0	0	2.10294e-05	0	0	0	0	6.42941e-06	0			0.0018	0	0	0	0	0
T250	3.00547e-05	0	0.00014038	0	0.000113585	5.68039e-05		8.0219e-05	8.02085e-05	0.000175568	4.13018e-05	0.00012722	0.000142623	0.000112126	2e-05	0	0.000129429	3.01e-05	0.000101497	4.64e-05	3.69e-05	0.000110194	3.53e-05		T250	2.34151e-05	2.34046e-05	0.000118764	0	7.04161e-05	8.58191e-05	5.53221e-05	0	0	7.26251e-05	0	4.46931e-05	0	0	5.33901e-05	0			0.00182	0	0	0	0	0
G250	0	0.000195992	0	3.97e-05	0	4.71384e-05		1.00274e-05	0	0	0.000165207	0	0	0	0	0	0	0	0	2.32e-05	7.37e-05	2e-05	3.53e-05		G250	0	0	0	0.000118069	0	0	0	0	0	0	0	0	0	2.65616e-05	0	0			0.00184	0	0	0	0	0
A251	0.000130509	0	6.97e-05	3.99e-05	0.000152091	7.844e-05		8.04764e-05	1.00556e-05	3.51e-05	0	5.1e-05	0	0.000224669	4.01e-05	0	0	5.03e-05	0	9.29e-05	0.000110673	9.04e-05	0		A251	2.03642e-06	0	0	0	0	0	0.000146229	0	0	0	0	0	1.446e-05	3.2233e-05	1.196e-05	0			0.00186	1	0	0	1	0
G251	2.00783e-05	0	0	0.00019937	3.8e-05	5.14897e-05		4.02382e-05	3.01668e-05	0.000105441	0.000206671	0	7.14e-05	5.62e-05	1e-05	0.000249615	0.000162586	3.02e-05	5.09e-05	9.29e-05	0	3.01e-05	3.53e-05		G251	0	0	5.39513e-05	0.000155182	0	1.99103e-05	4.71034e-06	0	0.000198125	0.000111096	0	0	4.14103e-05	0	0	0			0.00188	0	0	0	0	0
C251	0.000271057	0.000392831	0	0.000438614	0.000304183	0.000281337		0.000482859	0.00041228	0.000105441	0.000248006	5.1e-05	0.000464418	0.000224669	0.000341194	8.32e-05	0.000130069	0.000271627	0.000356125	0.000139421	0.000258236	0.000240935	0.000282735		C251	0.000201521	0.000130943	0	0	0	0.000183081	0	5.9857e-05	0	0	0	7.4788e-05	0	0	0	1.39798e-06			0.0019	1	0	0	0	0
A252	5.00972e-05	0	0.000207555	0	0	5.15304e-05		5.01379e-05	1.00275e-05	6.96e-05	4.08764e-05	0	0.000106101	0	7.01e-05	0	6.43e-05	1e-05	0	2.31e-05	3.66e-05	0	0		A252	0	0	1.80696e-05	0	0	5.45706e-05	0	1.85696e-05	0	1.27696e-05	0	0	0	0	0	0			0.00192	0	0	0	0	0
T252	6.01166e-05	0	0.000345925	7.88e-05	0	9.69683e-05		6.01655e-05	0.000140385	0.00010433	0.000122629	7.57e-05	3.54e-05	0	5.01e-05	0.000123589	0	5.01e-05	0	2.31e-05	0.000146359	2e-05	3.5e-05		T252	0	4.34163e-05	7.36167e-06	2.56608e-05	0	0	0	0	2.66207e-05	0	0	0	0	4.93907e-05	0	0			0.00194	0	0	0	0	0
G252	0	4.85e-05	6.92e-05	0	0	2.354e-05		1.00276e-05	1.00275e-05	6.96e-05	8.17528e-05	0	0	0	0	0	0	0	0	0	0	0	0		G252	0	0	4.606e-05	5.82128e-05	0	0	0	0	0	0	0	0	0	0	0	0			0.00196	0	0	0	1	0
A253	8.03277e-05	0.000238447	0.00013741	7.83e-05	7.45e-05	0.000121797		5.03155e-05	4.02123e-05	0.000137462	0.000121193	2.5e-05	0	0.00021925	9.04e-05	8.18e-05	0.000159612	0.00013086	0.000125025	0.000114403	3.61e-05	7.03e-05	0		A253	0	0	1.56651e-05	0	0	0	9.74531e-05	0	0	3.78151e-05	9.06305e-06	3.22805e-06	0	0	0	0			0.00198	0	0	0	0	0
G253	5.02048e-05	4.77e-05	0	0	0.000111819	4.19448e-05		2.01262e-05	1.00531e-05	0.000103096	8.0795e-05	2.5e-05	0	0	4.02e-05	0.000163646	3.19e-05	2.01e-05	7.5e-05	2.29e-05	0	0	0		G253	0	0	6.11512e-05	3.88503e-05	0	0	0	0	0.000121701	0	0	3.30552e-05	0	0	0	0			0.002	0	1	0	0	0
C253	0.000120492	0	0	0.000234898	0.000260912	0.00012326		0.000332082	0.000382017	0.000274924	0.000282783	7.5e-05	3.49e-05	0	0.000160646	0.000122735	0.000159612	0.000110727	0.000175035	0.000228807	0.000216614	0.000120521	0.000138222		C253	0.000208822	0.000258757	0.000151664	0.000159522	0	0	0	3.73857e-05	0	3.63517e-05	0	5.17747e-05	0.000105547	9.33537e-05	0	1.49617e-05				0	1	2	4	3
A254	5.00741e-05	0	0.00013575	2.83e-05	0	4.28248e-05		9.02201e-05	5.01178e-05	5.17e-05	9.23049e-05	0	0	4.05e-05	2e-05	3.18e-05	0	7.02e-05	1.93e-05	0	8.48e-05	3.01e-05	8.1e-05		A254	4.73953e-05	7.29295e-06	8.87518e-06	4.948e-05	0	0	0	0	0	0	2.73752e-05	0	0	4.19752e-05	0	3.81752e-05
T254	7.01038e-05	0.000235081	0	0.000141499	0.000108737	0.000111084		0.000200489	0.0001704	0.000129256	0.000123073	0.000118392	8.1e-05	0.000243063	9.01e-05	0	4.98e-05	0.000120354	0.000154193	5.28e-05	8.48e-05	0.000140247	8.1e-05		T254	8.9405e-05	5.93163e-05	1.81718e-05	1.1989e-05	7.30785e-06	0	0.000131979	0	0	0	9.26985e-06	4.31088e-05	0	0	2.91628e-05	0
G254	0	0	0	0	0	0		1.00245e-05	1.00236e-05	0	3.07683e-05	1.97e-05	0	0	1e-05	3.18e-05	0	5.01e-05	1.93e-05	0	2.83e-05	3.01e-05	2.7e-05		G254	1.00245e-05	1.00236e-05	0	3.07683e-05	1.97e-05	0	0	1e-05	3.18e-05	0	5.01e-05	1.93e-05	0	2.83e-05	3.01e-05	2.7e-05
T255	5.01318e-05	0.00010054	6.73e-05	0	2.72e-05	4.90344e-05		1.00433e-05	4.01727e-05	0	3.07144e-05	1.97e-05	2.7e-05	4.05e-05	6.02e-05	3.18e-05	2.48e-05	1e-05	3.85e-05	8.79e-05	0.000141131	3.01e-05	2.7e-05		T255	0	0	0	0	0	0	0	1.11656e-05	0	0	0	0	3.88656e-05	9.20966e-05	0	0
G255	0.000270712	0.000201079	0.000134508	0.000226168	8.15e-05	0.000182793		0.000361558	0.000562418	0.000671158	0.000245715	0.00041394	0.000431581	0.000607533	0.000320831	0.000317632	0.00027317	0.000281223	0.000308166	0.000228459	0.000310489	0.000471358	0.000323633		G255	0.000178765	0.000379625	0.000488365	6.29219e-05	0.000231147	0.000248788	0.00042474	0.000138038	0.000134839	9.03766e-05	9.84296e-05	0.000125373	4.56656e-05	0.000127696	0.000288565	0.00014084
C255	0.000150396	0	0.000269016	8.48e-05	0.000108725	0.000122587		0.000100433	3.01296e-05	0.000129069	3.07144e-05	5.91e-05	0.000134869	8.1e-05	8.02e-05	0.000127053	7.45e-05	5.02e-05	7.7e-05	8.79e-05	0	5.01e-05	5.39e-05		C255	0	0	6.48169e-06	0	0	1.22817e-05	0	0	4.46569e-06	0	0	0	0	0	0	0
A256	0.000120185	0	0.000170367	0.000112483	0.000134978	0.000107603		0.000110314	6.01365e-05	5.14e-05	0	0.000117881	2.69e-05	0.000161167	7.01e-05	0	7.42e-05	9.03e-05	7.67e-05	3.5e-05	0.000224814	1e-05	5.37e-05		A256	2.71178e-06	0	0	0	1.02784e-05	0	5.35644e-05	0	0	0	0	0	0	0.000117211	0	0
T256	2.00308e-05	3.33e-05	5.68e-05	2.81e-05	5.4e-05	3.84462e-05		4.01143e-05	1.00228e-05	0	3.05418e-05	3.93e-05	2.69e-05	0	3e-05	3.16e-05	0	6.02e-05	1.92e-05	3.5e-05	0	2e-05	0		T256	1.66816e-06	0	0	0	8.5383e-07	0	0	0	0	0	2.17538e-05	0	0	0	0	0
C256	0	0	0.000227157	2.81e-05	0	5.10514e-05		2.00572e-05	0	0	0	0	0	4.03e-05	0	3.16e-05	0	0	1.92e-05	0	0	1e-05	8.05e-05		C256	0	0	0	0	0	0	0	0	0	0	0	0	0	0	0	2.94486e-05
A257	6.01456e-05	0.000133151	0.000194241	8.43e-05	5.4e-05	0.000105168		8.01989e-05	4.01111e-05	0	0	1.96e-05	0	0	1e-05	0	0	9.03e-05	0	0	0	6.01e-05	2.68e-05		A257	0	0	0	0	0	0	0	0	0	0	0	0	0	0	0	0
T257	0.000150364	0.000166439	0.000145681	0.000196696	8.1e-05	0.000148036		0.000160398	0.000120333	0.000205318	9.15779e-05	0.00017664	0.00026842	0.000362071	0.000110226	0.000126187	0.000173006	0.000180601	0.000230008	0.000157378	0.000365199	0.000190413	0.000214414		T257	1.23618e-05	0	5.7282e-05	0	2.8604e-05	0.000120384	0.000214035	0	0	2.497e-05	3.2565e-05	8.1972e-05	9.34202e-06	0.000217163	4.2377e-05	6.6378e-05
G257	1.00243e-05	0	0	0	0	2.00485e-06		2.00497e-05	0	0	0	0	0	4.02e-05	3.01e-05	0	0	1e-05	1.92e-05	0	0	0	5.36e-05		G257	1.80449e-05	0	0	0	0	0	3.81951e-05	2.80951e-05	0	0	7.99515e-06	1.71951e-05	0	0	0	5.15951e-05
A258	0.000480914	0.000429624	0	0.000530904	0.000375406	0.00036337		0.00053184	0.00066182	0.000536056	0.000393987	0.000409756	0.000399893	0.000319374	0.000541028	0.000502166	0.000466991	0.000431519	0.000457788	0.000574123	0.000920091	0.000551213	0.000532552		A258	0.000168471	0.00029845	0.000172686	3.06176e-05	4.63865e-05	3.65235e-05	0	0.000177658	0.000138796	0.000103621	6.81495e-05	9.44185e-05	0.000210753	0.000556721	0.000187843	0.000169182
T258	4.00761e-05	0.000132192	9.57e-05	2.79e-05	2.68e-05	6.45336e-05		7.0243e-05	6.01655e-05	5.11e-05	6.06134e-05	3.9e-05	5.33e-05	3.99e-05	6.01e-05	6.28e-05	0	5.02e-05	0	5.22e-05	2.79e-05	2e-05	2.66e-05		T258	5.70941e-06	0	0	0	0	0	0	0	0	0	0	0	0	0	0	0
C258	3.00571e-05	6.61e-05	0	0	2.68e-05	2.45914e-05		5.01736e-05	4.01103e-05	2.55e-05	0	0	2.67e-05	7.98e-05	2e-05	3.14e-05	2.46e-05	4.01e-05	9.54e-05	5.22e-05	0	3.01e-05	0		C258	2.55822e-05	1.55189e-05	9.08578e-07	0	0	2.10858e-06	5.52086e-05	0	6.80858e-06	8.5783e-09	1.55086e-05	7.08086e-05	2.76086e-05	0	5.50858e-06	0
A259	0.000151295	0.00079515	0.000121996	0.000533199	0.000647197	0.000449767		0.000590169	0.000233164	0.000410393	0.000516843	0.000588155	0.00099441	0.000761431	0.000201589	0.000790314	0.000843066	0.000457364	0.000459585	0.000611824	0.00101104	0.000201753	0.00053559		A259	0.000140401	0	0	6.70756e-05	0.000138388	0.000544643	0.000311664	0	0.000340547	0.000393299	7.59658e-06	9.81758e-06	0.000162057	0.00056127	0	8.58226e-05
T259	6.0518e-05	0.000165656	0.000325322	0.000140315	0.000107866	0.000159935		0.000122104	0.000172339	0.000102598	0.000152013	0.000117631	0.000161256	0.000160301	8.06e-05	6.32e-05	0.000148776	5.08e-05	5.74e-05	0.000139845	5.62e-05	6.05e-05	0.000187456		T259	0	1.24032e-05	0	0	0	1.32059e-06	3.65593e-07	0	0	0	0	0	0	0	0	2.75206e-05
G259	0	0	0	0	0	0		1.01753e-05	0	0	0	0	0	0	5.04e-05	0	0	2.03e-05	1.91e-05	0	0	1.01e-05	0		G259	1.01753e-05	0	0	0	0	0	0	5.04e-05	0	0	2.03e-05	1.91e-05	0	0	1.01e-05	0
T260	0.000110651	3.16e-05	0.000150517	5.38e-05	0.000179598	0.000105233		0.000180576	7.04644e-05	0.000122552	0.000116026	0.000188601	0.000178992	3.82e-05	0.000180777	0.00018105	0.000118357	0.000211011	7.37e-05	0.000100702	0.000187688	6.02e-05	0.000231071		T260	7.53429e-05	0	1.73189e-05	1.0793e-05	8.33679e-05	7.37589e-05	0	7.55439e-05	7.58169e-05	1.31239e-05	0.000105778	0	0	8.24549e-05	0	0.000125838
G260	0.000150887	0.00119908	0.000112888	0.000806408	0.000872332	0.000628319		0.000441408	0.00030199	0.00110297	0.00130529	0.000754404	0.00112509	0.00126055	0.000281209	0.000935425	0.000757486	0.000311492	0.00079178	0.000721694	0.000831188	0.00039157	0.00100131		G260	0	0	0.000474649	0.000676975	0.000126085	0.00049677	0.000632233	0	0.000307106	0.000129167	0	0.000163461	9.33752e-05	0.000202869	0	0.00037299
C260	4.02366e-05	3.16e-05	0	8.06e-05	5.13e-05	4.07473e-05		4.0128e-05	1.00663e-05	4.9e-05	8.70196e-05	0	7.67e-05	7.64e-05	2.01e-05	6.04e-05	0.000118357	4.02e-05	7.37e-05	6.71e-05	2.68e-05	8.03e-05	5.13e-05		C260	0	0	8.25268e-06	4.62723e-05	0	3.59527e-05	3.56527e-05	0	1.96527e-05	7.76097e-05	0	3.29527e-05	2.63527e-05	0	3.95527e-05	1.05527e-05
A261	1.00228e-05	6.33e-05	0	0	5.15e-05	2.49646e-05		0.000130643	7.0291e-05	7.37e-05	8.71283e-05	3.78e-05	0.000128162	0.000191388	3.01e-05	3.03e-05	9.51e-05	6.03e-05	9.22e-05	5.05e-05	8.06e-05	4.01e-05	7.71e-05		A261	0.000105678	4.53265e-05	4.87354e-05	6.21637e-05	1.28354e-05	0.000103197	0.000166423	5.13545e-06	5.33545e-06	7.01354e-05	3.53354e-05	6.72354e-05	2.55354e-05	5.56354e-05	1.51354e-05	5.21354e-05
T261	0.00029066	0.000253157	0.000147433	0.000134724	5.15e-05	0.000175495		0.000783857	0.000391621	0.000270284	0.000406599	0.00041584	0.000256325	0.000114833	0.000140323	9.08e-05	0.000118878	4.02e-05	0.00014755	6.73e-05	0.000215008	0.000210564	0.000154281		T261	0.000608362	0.000216127	9.47892e-05	0.000231104	0.000240345	8.08302e-05	0	0	0	0	0	0	0	3.95132e-05	3.50692e-05	0
G261	0	0	0.000184291	0	0	3.68582e-05		0	1.00416e-05	2.46e-05	5.80855e-05	1.89e-05	2.56e-05	0	0	0	0	0	3.69e-05	0	2.69e-05	1e-05	0		G261	0	0	0	2.12273e-05	0	0	0	0	0	0	0	4.18e-08	0	0	0	0
T262	9.02989e-05	0.000156715	3.29e-05	5.35e-05	2.56e-05	7.18028e-05		0.000130374	9.03905e-05	4.87e-05	0.000115287	0.00011263	5.09e-05	7.59e-05	7.02e-05	0.00018044	7.06e-05	9.04e-05	7.33e-05	6.68e-05	0.000213276	8.02e-05	5.11e-05		T262	5.85714e-05	1.85877e-05	0	4.34843e-05	4.08272e-05	0	4.09722e-06	0	0.000108637	0	1.85972e-05	1.49722e-06	0	0.000141473	8.39722e-06	0
G262	0.000180598	3.13e-05	6.57e-05	0.000213898	0.000153457	0.000128991		0.000381094	0.000472039	0.000243659	0.000605257	0.000337889	0.000508595	0.000151889	0.00030083	0.00018044	0.000235438	0.000150611	0.000274896	0.000217141	0.000399893	0.000200493	0.000230026		G262	0.000252103	0.000343049	0.000114668	0.000476267	0.000208898	0.000379604	2.28984e-05	0.000171839	5.14494e-05	0.000106447	2.16204e-05	0.000145905	8.81504e-05	0.000270902	7.15024e-05	0.000101035
C262	0.000100332	3.13e-05	3.29e-05	5.35e-05	0.000127881	6.91826e-05		9.0259e-05	0.000100434	0	0.000288218	3.75e-05	0.000127149	7.59e-05	4.01e-05	9.02e-05	0	7.03e-05	0.000146611	1.67e-05	2.67e-05	0	2.56e-05		C262	2.10764e-05	3.12513e-05	0	0.000219035	0	5.79664e-05	6.71738e-06	0	2.10174e-05	0	1.11738e-06	7.74284e-05	0	0	0	0
T263	6.01257e-05	0.0001254	6.54e-05	5.34e-05	0	6.08651e-05		3.009e-05	6.01667e-05	7.31e-05	5.75838e-05	5.63e-05	2.54e-05	3.8e-05	3.01e-05	3e-05	4.71e-05	6.02e-05	5.49e-05	0.000133623	5.33e-05	7.01e-05	7.66e-05		T263	0	0	1.22349e-05	0	0	0	0	0	0	0	0	0	7.27579e-05	0	9.23487e-06	1.57349e-05
G263	0.000160335	0.0001881	9.82e-05	0.000106878	5.11e-05	0.000120923		0.00024072	0.000350972	0.000292234	0.000316711	0.000243752	0.000228938	0.000303698	0.000120237	0.000210217	0.00014127	0.000110394	0.000329465	0.00023384	0.000293107	0.000140276	0.00017885		G263	0.000119797	0.00023005	0.000171311	0.000195788	0.000122829	0.000108015	0.000182775	0	8.92944e-05	2.03474e-05	0	0.000208542	0.000112917	0.000172184	1.93534e-05	5.79274e-05
C263	0	0	0	0	0	0		7.02099e-05	4.01111e-05	7.31e-05	2.87919e-05	0	0	3.8e-05	2e-05	3e-05	0	4.01e-05	7.32e-05	5.01e-05	2.66e-05	5.01e-05	7.66e-05		C263	7.02099e-05	4.01111e-05	7.31e-05	2.87919e-05	0	0	3.8e-05	2e-05	3e-05	0	4.01e-05	7.32e-05	5.01e-05	2.66e-05	5.01e-05	7.66e-05
A264	8.01667e-05	3.09e-05	3.16e-05	7.92e-05	5.05e-05	5.44733e-05		2.00584e-05	7.0236e-05	0.000144245	5.68473e-05	1.86e-05	0	7.48e-05	7.01e-05	0	0.000162734	0	1.81e-05	8.26e-05	5.26e-05	6.01e-05	0.000100967		A264	0	1.57626e-05	8.97717e-05	2.3739e-06	0	0	2.03267e-05	1.56267e-05	0	0.000108261	0	0	2.81267e-05	0	5.62665e-06	4.64937e-05
G264	2.00417e-05	0.000123682	6.31e-05	0.000211271	7.57e-05	9.87589e-05		2.00584e-05	1.00337e-05	7.21e-05	5.68473e-05	5.57e-05	5.02e-05	7.48e-05	0	0.000118694	0.000162734	2.01e-05	5.43e-05	8.26e-05	2.63e-05	0	0.000126208		G264	0	0	0	0	0	0	0	0	1.99351e-05	6.39751e-05	0	0	0	0	0	2.74491e-05
C264	8.01667e-05	0.000185523	0	2.64e-05	5.05e-05	6.85179e-05		0.000110321	0.000301011	0.000120204	0.000255813	0.000278417	5.02e-05	0.000187119	0.000110229	2.97e-05	0.000232477	6.02e-05	0.000162937	0.000214848	0.000105244	0.000170361	0.000176692		C264	4.18031e-05	0.000232493	5.16861e-05	0.000187295	0.000209899	0	0.000118601	4.17111e-05	0	0.000163959	0	9.44191e-05	0.00014633	3.67261e-05	0.000101843	0.000108174
A265	8.04732e-05	6.18e-05	6.18e-05	0.000105694	0.000100997	8.21528e-05		8.0331e-05	5.03236e-05	2.4e-05	0.000113701	0.000111412	2.51e-05	3.75e-05	0.000110503	8.91e-05	4.66e-05	8.05e-05	5.43e-05	3.31e-05	0.000105255	9.04e-05	2.52e-05		A265	0	0	0	3.15481e-05	2.92592e-05	0	0	2.83502e-05	6.94716e-06	0	0	0	0	2.31022e-05	8.24716e-06	0
G265	1.00591e-05	6.18e-05	9.26e-05	0.000158541	7.57e-05	7.974e-05		2.00827e-05	3.01941e-05	9.62e-05	5.68505e-05	3.71e-05	0.000125562	0.000112389	1e-05	0.000118832	6.98e-05	0	0.000108617	4.96e-05	0.000131569	1e-05	5.05e-05		G265	0	0	1.646e-05	0	0	4.5822e-05	3.2649e-05	0	3.9092e-05	0	0	2.8877e-05	0	5.1829e-05	0	0
C265	0.000130769	0.000123663	0.000123525	0.000132118	0.000151496	0.000132314		0.000180745	0.000432783	0.000360681	0.000312678	0.000371374	0.00042691	0.000561945	0.000271234	0.000178248	0.000256058	0.000181127	0.00012672	0.000364027	0.000236823	0.000230931	0.000252455		C265	4.84305e-05	0.000300469	0.000228367	0.000180363	0.00023906	0.000294596	0.000429631	0.00013892	4.59338e-05	0.000123744	4.88128e-05	0	0.000231713	0.000104509	9.86168e-05	0.000120141
A266	6.03179e-05	0.00015387	3.05e-05	7.9e-05	0.000100639	8.48654e-05		0.000110629	0.00010057	0.000263656	2.8323e-05	7.41e-05	0.000100128	0.000148965	9.05e-05	2.96e-05	0.000139541	8.06e-05	0.000108397	0.000165074	2.62e-05	5.03e-05	7.54e-05		A266	2.57641e-05	1.57049e-05	0.000178791	0	0	1.52626e-05	6.40996e-05	5.63462e-06	0	5.46756e-05	0	2.35316e-05	8.02086e-05	0	0	0
T266	3.01589e-05	0.000184644	0	0.000184317	5.03e-05	8.9884e-05		0.000130744	0.00010057	4.79e-05	8.4969e-05	7.41e-05	5.01e-05	7.45e-05	6.03e-05	0.000177815	0.000116284	0.000110798	0	6.6e-05	0.000131034	7.04e-05	0.000100591		T266	4.08599e-05	1.06862e-05	0	0	0	0	0	0	8.7931e-05	2.64e-05	2.0914e-05	0	0	4.115e-05	0	1.0707e-05
C266	0	0	0	0	0	0		1.00572e-05	0	0	2.8323e-05	0	0	0	1.01e-05	0	2.33e-05	1.01e-05	0	3.3e-05	0	0	0		C266	1.00572e-05	0	0	2.8323e-05	0	0	0	1.01e-05	0	2.33e-05	1.01e-05	0	3.3e-05	0	0	0
A267	1.0023e-05	9.18e-05	6.11e-05	2.62e-05	5e-05	4.78246e-05		7.02184e-05	1.00259e-05	2.38e-05	8.44951e-05	3.68e-05	2.49e-05	0	0	2.95e-05	2.31e-05	3.01e-05	5.39e-05	8.21e-05	2.61e-05	3.01e-05	5e-05		A267	2.23938e-05	0	0	3.66706e-05	0	0	0	0	0	0	0	6.07541e-06	3.42754e-05	0	0	2.17541e-06
T267	0.000451033	0.000244678	0.000122242	0.000340207	0.000274973	0.000286627		0.000692153	0.000391009	0.000524122	0.000450641	0.000257798	0.000547809	0.000222742	0.000200465	0.000206161	0.000161648	0.00027084	0.000269363	0.000262648	0.000339036	0.000350853	0.00039977		T267	0.000405526	0.000104382	0.000237495	0.000164014	0	0.000261182	0	0	0	0	0	0	0	5.24094e-05	6.42264e-05	0.000113143
G267	0	0	0.000213923	2.62e-05	0	4.80246e-05		0	4.01035e-05	2.38e-05	0	1.84e-05	2.49e-05	7.42e-05	1e-05	0	4.62e-05	4.01e-05	1.8e-05	8.21e-05	0	3.01e-05	5e-05		G267	0	0	0	0	0	0	2.61754e-05	0	0	0	0	0	3.40754e-05	0	0	1.9754e-06
A268	0.000360765	0.000181824	3.03e-05	5.18e-05	0.000296523	0.000184242		0.000511406	0.000441019	0.000377724	0.000362804	0.000329254	0.000172609	0.000441047	0.000270525	0.00035016	6.86e-05	0.000260767	0.000284941	0.000211837	0.000232889	0.000390797	0.000297405		A268	0.000327164	0.000256776	0.000193482	0.000178562	0.000145012	0	0.000256805	8.62826e-05	0.000165918	0	7.65246e-05	0.000100699	2.75946e-05	4.86466e-05	0.000206555	0.000113163
T268	7.01487e-05	0.000121216	3.03e-05	5.18e-05	2.47e-05	5.96329e-05		7.0193e-05	5.01158e-05	4.72e-05	2.7908e-05	7.32e-05	0	3.68e-05	2e-05	8.75e-05	9.15e-05	2.01e-05	1.78e-05	0	0	7.01e-05	2.48e-05		T268	1.05601e-05	0	0	0	1.35671e-05	0	0	0	2.78671e-05	3.18671e-05	0	0	0	0	1.04671e-05	0
C268	4.0085e-05	3.03e-05	0	0	0	1.4077e-05		6.01655e-05	3.00695e-05	0	0	1.83e-05	4.93e-05	3.68e-05	3.01e-05	0	0.000114343	4.01e-05	8.9e-05	1.63e-05	0	3.01e-05	2.48e-05		C268	4.60885e-05	1.59925e-05	0	0	4.223e-06	3.5223e-05	2.2723e-05	1.6023e-05	0	0.000100266	2.6023e-05	7.4923e-05	2.223e-06	0	1.6023e-05	1.0723e-05
A269	3.00469e-05	9.05e-05	5.98e-05	0	4.92e-05	4.59094e-05		5.01163e-05	3.00601e-05	0	0	5.47e-05	4.91e-05	3.66e-05	5.01e-05	5.82e-05	2.28e-05	2.01e-05	3.55e-05	8.13e-05	2.58e-05	4.01e-05	0		A269	4.2069e-06	0	0	0	8.79063e-06	3.19063e-06	0	4.19063e-06	1.22906e-05	0	0	0	3.53906e-05	0	0	0
T269	0.000230359	0.000150916	2.99e-05	0.000180538	4.92e-05	0.000128183		0.000270628	0.000210421	0.000164656	8.34771e-05	0.000127723	0.000221174	0.000183164	0.000250378	8.73e-05	0.000159686	0.000240669	0.000106487	8.13e-05	0.000128969	0.000260448	0.000197648		T269	0.000142445	8.22382e-05	3.64733e-05	0	0	9.29913e-05	5.49813e-05	0.000122195	0	3.15033e-05	0.000112486	0	0	7.86328e-07	0.000132265	6.94653e-05
G269	0	0	0.000119657	0	2.46e-05	2.88514e-05		1.00233e-05	1.002e-05	2.35e-05	0	1.82e-05	2.46e-05	0	2e-05	0	0	0	0	3.25e-05	0	2e-05	2.47e-05		G269	0	0	0	0	0	0	0	0	0	0	0	0	3.6486e-06	0	0	0
A270	4.01188e-05	8.75e-05	2.16e-05	0	2.38e-05	3.46038e-05		8.01716e-05	4.00902e-05	0	0.000134542	7.11e-05	9.53e-05	0	7.02e-05	8.49e-05	4.44e-05	6.02e-05	0	3.17e-05	0.00010011	1e-05	7.21e-05		A270	4.55678e-05	5.48645e-06	0	9.99387e-05	3.64962e-05	6.06962e-05	0	3.55962e-05	5.02962e-05	9.79625e-06	2.55962e-05	0	0	6.55062e-05	0	3.74962e-05
T270	0.000230683	0.000204147	4.33e-05	0.000425543	0.000190444	0.000218823		0.000521115	0.00055124	0.000410874	0.000457444	0.000426879	0.000357313	0.000390417	0.00019043	0.00025459	0.000354814	0.000341061	0.000484086	0.000364455	0.000425468	0.0003008	0.000384283		T270	0.000302292	0.000332417	0.000192051	0.000238621	0.000208056	0.00013849	0.000171594	0	3.57666e-05	0.000135991	0.000122238	0.000265263	0.000145632	0.000206645	8.19766e-05	0.00016546
G270	1.00297e-05	2.92e-05	0	2.5e-05	0	1.28459e-05		1.00214e-05	0	0	0	5.34e-05	9.53e-05	7.1e-05	1e-05	2.83e-05	6.65e-05	0	3.46e-05	1.58e-05	0	5.01e-05	4.8e-05		G270	0	0	0	0	4.05541e-05	8.24541e-05	5.81541e-05	0	1.54541e-05	5.36541e-05	0	2.17541e-05	2.95406e-06	0	3.72541e-05	3.51541e-05
A271	5.00947e-05	0.000291945	4.32e-05	0.000150297	0.000119229	0.000130953		0.000160407	0.000180404	0.000205456	0.000242092	0.000124509	0.00016681	0.000177355	8.02e-05	5.67e-05	8.88e-05	0.000160541	0.000103772	7.93e-05	0.000125229	0.00011025	0.000119979		A271	2.94543e-05	4.9451e-05	7.45029e-05	0.000111139	0	3.58569e-05	4.64019e-05	0	0	0	2.95879e-05	0	0	0	0	0
T271	1.00189e-05	5.84e-05	0.00030248	5.01e-05	2.38e-05	8.89598e-05		7.01783e-05	3.00674e-05	4.57e-05	0	0	2.38e-05	7.09e-05	5.01e-05	2.83e-05	2.22e-05	7.02e-05	0.000103772	7.93e-05	7.51e-05	2e-05	7.2e-05		T271	0	0	0	0	0	0	0	0	0	0	0	1.48122e-05	0	0	0	0
C271	0	8.76e-05	4.32e-05	2.5e-05	4.77e-05	4.07e-05		2.00509e-05	3.00674e-05	0	0	1.78e-05	0	0	1e-05	0	0	0	3.46e-05	0	2.5e-05	3.01e-05	2.4e-05		C271	0	0	0	0	0	0	0	0	0	0	0	0	0	0	0	0
T272	0.000110618	5.8e-05	2.15e-05	2.5e-05	4.75e-05	5.25237e-05		4.02443e-05	8.05404e-05	0.000136286	8.0156e-05	5.31e-05	2.37e-05	0	5.02e-05	0.000113135	0	4.03e-05	5.17e-05	7.92e-05	9.99e-05	0.000110549	2.39e-05		T272	0	2.80168e-05	8.37623e-05	2.76324e-05	5.76329e-07	0	0	0	6.06113e-05	0	0	0	2.66763e-05	4.73763e-05	5.80253e-05	0
G272	9.05059e-05	0.000202899	2.15e-05	0.000124844	9.5e-05	0.00010695		0.000221344	0.000322162	0.000136286	0.000213749	0.00019488	0.00023709	0.000175914	0.000160739	0.000282837	0.000132896	0.000231687	0.000206782	0.00014259	0.000199745	9.04e-05	0.000358329		G272	0.000114394	0.000215212	2.93362e-05	0.0001068	8.79302e-05	0.00013014	6.89642e-05	5.37892e-05	0.000175887	2.59462e-05	0.000124737	9.98322e-05	3.56402e-05	9.27952e-05	0	0.000251379
C272	1.00562e-05	5.8e-05	4.3e-05	7.49e-05	7.12e-05	5.14312e-05		0	1.00676e-05	4.54e-05	0	0	0	0	1e-05	0	0	2.01e-05	0	3.17e-05	4.99e-05	1e-05	0		C272	0	0	0	0	0	0	0	0	0	0	0	0	0	0	0	0
A273	9.02925e-05	0.000201196	0	0.000123451	2.35e-05	8.76879e-05		0.00016047	0.000220671	9.02e-05	0.000185721	0.000105565	0.000117586	0.000174727	0.000100273	0.000139915	6.57e-05	7.03e-05	0.000102482	0.000109864	0.000247709	9.03e-05	0.000166148		A273	7.27823e-05	0.000132983	2.51209e-06	9.80328e-05	1.78771e-05	2.98981e-05	8.70391e-05	1.25851e-05	5.22271e-05	0	0	1.47941e-05	2.21761e-05	0.000160021	2.61209e-06	7.84601e-05
T273	2.0065e-05	0	8.6e-05	2.47e-05	0	2.6153e-05		7.02057e-05	6.0183e-05	2.26e-05	0.000132658	1.76e-05	4.7e-05	3.49e-05	3.01e-05	2.8e-05	2.19e-05	6.02e-05	0	3.14e-05	2.48e-05	4.01e-05	2.37e-05		T273	4.40527e-05	3.403e-05	0	0.000106505	0	2.0847e-05	8.747e-06	3.947e-06	1.847e-06	0	3.4047e-05	0	5.247e-06	0	1.3947e-05	0
C273	3.00975e-05	0	0	0	0	6.0195e-06		2.00588e-05	1.00305e-05	0	0	1.76e-05	0	0	0	0	2.19e-05	2.01e-05	1.71e-05	0	0	3.01e-05	0		C273	1.40393e-05	4.01099e-06	0	0	1.15805e-05	0	0	0	0	1.58805e-05	1.40805e-05	1.10805e-05	0	0	2.40805e-05	0
A274	5.00541e-05	0	0.000470578	2.46e-05	2.34e-05	0.000113726		5.00661e-05	7.00799e-05	0.000135181	0	1.76e-05	2.35e-05	0.000174599	1e-05	8.38e-05	2.19e-05	5.01e-05	5.12e-05	7.83e-05	2.47e-05	4e-05	2.37e-05		A274	0	0	2.14546e-05	0	0	0	6.08726e-05	0	0	0	0	0	0	0	0	0
T274	0.000460497	0.000516603	8.56e-05	0.000467796	0.000328184	0.000371736		0.000580767	0.000750856	0.000540723	0.000529787	0.000386528	0.000633996	0.000768237	0.000220258	0.000390887	0.000306292	0.000450816	0.000443656	0.000485635	0.000890428	0.000310348	0.000687253		T274	0.000209031	0.00037912	0.000168987	0.000158051	1.47919e-05	0.00026226	0.000396501	0	1.91509e-05	0	7.90799e-05	7.19199e-05	0.000113899	0.000518692	0	0.000315517
G274	3.00324e-05	0	2.14e-05	7.39e-05	0	2.50665e-05		9.0119e-05	0	2.25e-05	0	0	0	0	0	0	4.38e-05	0	3.41e-05	3.13e-05	4.95e-05	2e-05	0		G274	6.50525e-05	0	0	0	0	0	0	0	0	1.87335e-05	0	9.03351e-06	6.23351e-06	2.44335e-05	0	0
A275	7.01368e-05	0	0.000408163	4.91e-05	0	0.00010548		4.00769e-05	0.00012022	4.48e-05	7.92288e-05	0	0	0	4.01e-05	2.78e-05	8.72e-05	5.01e-05	5.1e-05	4.68e-05	0	5.01e-05	2.36e-05		A275	0	1.474e-05	0	0	0	0	0	0	0	0	0	0	0	0	0	0
T275	0.000340664	0.000314429	0	0.000171868	0.000163513	0.000198095		0.0002605	8.01467e-05	0.00029131	0.000132048	0.000297979	0.000303944	0.00020829	0.000130231	2.78e-05	0.000174497	0.0001504	0.000203901	0.000218562	0.000295719	0.00026061	0.00033008		T275	6.24053e-05	0	9.32151e-05	0	9.98841e-05	0.000105849	1.01951e-05	0	0	0	0	5.80614e-06	2.04671e-05	9.76241e-05	6.25151e-05	0.000131985
G275	0	0	0	0	0	0		2.00385e-05	3.0055e-05	0	0	0	4.68e-05	0	0	2.78e-05	2.18e-05	2.01e-05	3.4e-05	3.12e-05	2.46e-05	0	0		G275	2.00385e-05	3.0055e-05	0	0	0	4.68e-05	0	0	2.78e-05	2.18e-05	2.01e-05	3.4e-05	3.12e-05	2.46e-05	0	0
A276	0.00016072	0.000255182	0.00014414	0.000219165	0.000139027	0.000183647		0.000411052	0.000452021	0.00017792	0.000209545	0.000191404	0.000115953	0.000206882	0.000190595	0.000193531	0.000194868	0.000240949	0.000354838	0.000232796	9.79e-05	0.000260832	0.000210443		A276	0.000227405	0.000268374	0	2.5898e-05	7.75719e-06	0	2.32352e-05	6.94819e-06	9.88419e-06	1.12212e-05	5.73022e-05	0.000171191	4.91492e-05	0	7.71852e-05	2.67962e-05
T276	4.018e-05	2.84e-05	0.000782473	7.31e-05	0	0.000184831		2.00513e-05	2.00898e-05	0	0	0	2.32e-05	0	0	5.53e-05	2.17e-05	5.02e-05	1.69e-05	3.1e-05	0.000195786	2.01e-05	4.68e-05		T276	0	0	0	0	0	0	0	0	0	0	0	0	0	1.09554e-05	0	0
C276	2.009e-05	5.67e-05	8.24e-05	4.87e-05	2.32e-05	4.6218e-05		1.00257e-05	3.01347e-05	2.22e-05	2.61931e-05	0	2.32e-05	0	1e-05	0	2.17e-05	0	0	3.1e-05	2.45e-05	2.01e-05	0		C276	0	0	0	0	0	0	0	0	0	0	0	0	0	0	0	0
A277	5.00927e-05	5.64e-05	4.13e-05	0	0	2.95585e-05		7.01185e-05	0.00013025	0	0	3.47e-05	4.62e-05	3.43e-05	1e-05	2.75e-05	8.63e-05	8.02e-05	5.05e-05	1.55e-05	0	1e-05	2.33e-05		A277	4.056e-05	0.000100692	0	0	5.14147e-06	1.66415e-05	4.74147e-06	0	0	5.67415e-05	5.06415e-05	2.09415e-05	0	0	0	0
T277	8.01483e-05	0.00011279	0.000227108	2.43e-05	0.00016151	0.000121171		0.000140237	0.000150289	8.85e-05	0.00010433	0.000104024	4.62e-05	3.43e-05	0.000190272	0.000137521	6.47e-05	0.000110238	0.000117821	0.000185575	4.87e-05	0.000100179	6.99e-05		T277	1.90657e-05	2.91173e-05	0	0	0	0	0	6.91007e-05	1.63497e-05	0	0	0	6.44037e-05	0	0	0
G277	0	0	0	7.28e-05	2.31e-05	1.918e-05		1.00169e-05	0	0	0	0	0	0	0	2.75e-05	2.16e-05	2e-05	0	1.55e-05	0	1e-05	2.33e-05		G277	0	0	0	0	0	0	0	0	8.32e-06	2.42e-06	8.2e-07	0	0	0	0	4.12e-06
A278	0.000281156	0.000221355	0.000163864	0.000190685	0.000158583	0.000203129		0.000230877	0.000160667	8.73e-05	0.000179612	6.84e-05	0.000136398	0.000134894	0.000170568	8.12e-05	0.000127251	0.000190849	0.000116069	7.62e-05	0.000215822	0.000190694	0.000114853		A278	2.77488e-05	0	0	0	0	0	0	0	0	0	0	0	0	1.26935e-05	0	0
T278	7.02889e-05	0.000193686	0.000143381	9.53e-05	9.06e-05	0.000118651		8.03052e-05	0.000100417	4.36e-05	2.56588e-05	1.71e-05	4.55e-05	3.37e-05	2.01e-05	0	6.36e-05	3.01e-05	3.32e-05	0	0.000119901	3.01e-05	2.3e-05		T278	0	0	0	0	0	0	0	0	0	0	0	0	0	1.24982e-06	0	0
C278	6.02476e-05	0	4.1e-05	0	2.27e-05	2.47895e-05		3.01144e-05	2.00833e-05	0	5.13176e-05	1.71e-05	0	3.37e-05	1e-05	0	4.24e-05	0	3.32e-05	3.05e-05	0	5.02e-05	2.3e-05		C278	5.32491e-06	0	0	2.65281e-05	0	0	8.91048e-06	0	0	1.76105e-05	0	8.41048e-06	5.71048e-06	0	2.54105e-05	0
T279	2.00497e-05	5.53e-05	4.1e-05	0	6.8e-05	3.68699e-05		5.01354e-05	4.01208e-05	0.000152668	0.000128264	0.000102533	4.54e-05	3.37e-05	2e-05	0.000108231	4.24e-05	3.01e-05	0.00018243	7.62e-05	0.000119898	6.02e-05	0.000114945		T279	1.32654e-05	3.25082e-06	0.000115798	9.13944e-05	6.56631e-05	8.53006e-06	0	0	7.13611e-05	5.53006e-06	0	0.00014556	3.93301e-05	8.30281e-05	2.33301e-05	7.80751e-05
G279	0.000130323	0.000138305	4.1e-05	0.000143092	9.06e-05	0.000108664		0.000360975	0.000401208	0.000261717	0.00035914	0.000375953	0.000181764	0.000168572	8.02e-05	0.000108231	0.000190844	0.000140461	9.95e-05	7.62e-05	0.000143878	0.000150411	0.000206901		G279	0.000252311	0.000292544	0.000153053	0.000250476	0.000267289	7.31e-05	5.9908e-05	0	0	8.218e-05	3.1797e-05	0	0	3.5214e-05	4.1747e-05	9.8237e-05
C279	1.00249e-05	0	2.05e-05	0	0	6.10497e-06		1.00271e-05	5.0151e-05	0	2.56529e-05	5.13e-05	4.54e-05	0	3.01e-05	2.71e-05	2.12e-05	2.01e-05	1.66e-05	1.52e-05	2.4e-05	0	0		C279	3.9221e-06	4.4046e-05	0	1.95479e-05	4.5195e-05	3.9295e-05	0	2.3995e-05	2.0995e-05	1.5095e-05	1.3995e-05	1.0495e-05	9.09503e-06	1.7895e-05	0	0
T280	8.00673e-05	0.000245848	0.00012131	2.35e-05	8.96e-05	0.000112065		0.000110111	6.00528e-05	6.47e-05	0.000101366	8.45e-05	0.000179751	0.000166528	0.000130116	0.000214144	4.2e-05	0.00013021	8.21e-05	4.53e-05	4.74e-05	0.0001802	9.09e-05		T280	0	0	0	0	0	6.76859e-05	5.44629e-05	1.80509e-05	0.000102079	0	1.81449e-05	0	0	0	6.81349e-05	0
G280	0.000210177	0.000136582	0.000181965	7.06e-05	0.000223924	0.00016465		0.000260263	0.000270238	0.000280245	0.000456147	0.000287376	0.000449378	0.000233139	0.00018016	0.000214144	6.29e-05	0.000110177	0.000279041	0.000271772	0.000331754	0.000170189	0.00015912		G280	9.56134e-05	0.000105588	0.000115595	0.000291497	0.000122726	0.000284728	6.84895e-05	1.55105e-05	4.94945e-05	0	0	0.000114391	0.000107122	0.000167104	5.53949e-06	0
C280	2.00168e-05	0	0.000101092	2.35e-05	0	2.89218e-05		0	0	0	2.53415e-05	0	2.25e-05	0	6.01e-05	0	4.2e-05	1e-05	0	6.04e-05	0	4e-05	0		C280	0	0	0	0	0	0	0	3.11782e-05	0	1.30782e-05	0	0	3.14782e-05	0	1.10782e-05	0
A281	0.000130129	2.72e-05	8.09e-05	0.000211964	8.95e-05	0.000107939		5.00761e-05	5.00526e-05	0	0	8.44e-05	4.48e-05	9.96e-05	1e-05	0.000240912	0.000104727	5.01e-05	9.85e-05	6.03e-05	2.36e-05	2e-05	9.07e-05		A281	0	0	0	0	0	0	0	0	0.000132973	0	0	0	0	0	0	0
T281	0.000170168	2.72e-05	0.00014162	9.42e-05	0.000111932	0.000109024		0.000100152	0.000180189	0.000258198	0.000303544	0.000151868	4.48e-05	0.000265675	8.01e-05	8.03e-05	0.000125673	0.000100181	6.56e-05	0.000196099	0.000189125	0.000210265	0.000158773		T281	0	7.11651e-05	0.000149174	0.00019452	4.28439e-05	0	0.000156651	0	0	1.66489e-05	0	0	8.70749e-05	8.01009e-05	0.000101241	4.97489e-05
G281	5.00495e-05	0	0.000222546	0	0	5.45191e-05		2.00304e-05	4.0042e-05	0	0	0	0	0	1e-05	0	2.09e-05	4.01e-05	0	0	0	0	2.27e-05		G281	0	0	0	0	0	0	0	0	0	0	0	0	0	0	0	0
T282	0.000240305	0.000108009	0.000121065	7e-05	0.000177321	0.00014334		0.000160195	0.000210202	0.000149435	0.000200879	0.000217701	0.000244684	0.000461376	0.000270295	0.000106087	0.000186885	0.000360483	0.000195195	0.000329489	0.000210872	0.000140171	0.000292819		T282	1.68554e-05	6.68618e-05	6.09496e-06	5.75388e-05	7.4361e-05	0.000101344	0.000318036	0.000126955	0	4.3545e-05	0.000217143	5.1855e-05	0.000186149	6.7532e-05	0	0.000149479
G282	0.000100127	0.000135011	0.000121065	0.000116599	0.000155156	0.000125592		0.000440537	0.000670644	0.000597741	0.000677966	0.000602864	0.000711807	0.00036251	0.000230251	0.000132608	0.000186885	0.000420564	0.000227727	0.000284559	0.000140581	0.000330403	0.00049554		G282	0.000314946	0.000545052	0.000472149	0.000552374	0.000477272	0.000586215	0.000236918	0.000104659	7.01637e-06	6.12934e-05	0.000294972	0.000102135	0.000158967	1.49894e-05	0.000204811	0.000369948
C282	0.000130165	5.4e-05	0	2.33e-05	4.43e-05	5.03531e-05		9.01099e-05	0.000150144	6.4e-05	0.000276208	8.37e-05	0.00011122	0.000230688	0.000200218	7.96e-05	0.00012459	0.000170228	9.76e-05	0.000194698	0	0.000100122	0.000135147		C282	3.97569e-05	9.97911e-05	1.36469e-05	0.000225855	3.33469e-05	6.08669e-05	0.000180335	0.000149865	2.92469e-05	7.42369e-05	0.000119875	4.72469e-05	0.000144345	0	4.97689e-05	8.47939e-05
A283	0	2.69e-05	6.02e-05	6.98e-05	0	3.138e-05		3.01166e-05	1.00635e-05	0	7.50413e-05	3.34e-05	4.44e-05	0	3.01e-05	0	4.15e-05	2.01e-05	1.62e-05	5.98e-05	0	3.01e-05	0		A283	0	0	0	4.36613e-05	2.02e-06	1.302e-05	0	0	0	1.012e-05	0	0	2.842e-05	0	0	0
T283	0.000110727	5.39e-05	0.000280792	9.31e-05	0.000132787	0.000134261		0.000100389	0.000130826	0.000383199	5.00275e-05	5.01e-05	0.000133111	0.000361177	8.04e-05	0.000264718	0.000124363	8.04e-05	9.74e-05	0.000179364	9.34e-05	6.03e-05	0.000112337		T283	0	0	0.000248938	0	0	0	0.000226916	0	0.000130457	0	0	0	4.51027e-05	0	0	0
G283	3.01984e-05	0	0	0	0	6.03968e-06		0	1.00635e-05	0	0	5.01e-05	0	0	1e-05	0	0	1.01e-05	0	0	2.34e-05	3.01e-05	0		G283	0	4.02382e-06	0	0	4.40603e-05	0	0	3.96032e-06	0	0	4.06032e-06	0	0	1.73603e-05	2.40603e-05	0
T284	5.02447e-05	5.38e-05	0.000377921	6.98e-05	0	0.000110353		5.01203e-05	1.0048e-05	0	7.49269e-05	0.000100165	6.65e-05	3.28e-05	3.01e-05	7.93e-05	0	3.01e-05	9.72e-05	4.48e-05	7e-05	2.01e-05	4.49e-05		T284	0	0	0	0	0	0	0	0	0	0	0	0	0	0	0	0
G284	0.000241175	0.000322789	5.97e-05	0.000232612	0.000287083	0.000228672		0.000481155	0.000723458	0.000382922	0.000424586	0.000684463	0.000288178	0.000754469	0.000220748	0.000343833	0.000331112	0.00030129	0.000291654	0.000612013	0.000466429	0.000391276	0.000493894		G284	0.000252483	0.000494786	0.00015425	0.000195914	0.000455791	5.95063e-05	0.000525797	0	0.000115161	0.00010244	7.26183e-05	6.29823e-05	0.000383341	0.000237757	0.000162604	0.000265222
C284	9.04404e-05	8.07e-05	5.97e-05	0.000116306	0.000154583	0.000100346		6.01443e-05	7.03362e-05	0.000148914	7.49269e-05	5.01e-05	8.87e-05	3.28e-05	4.01e-05	7.93e-05	0.000103473	6.03e-05	6.48e-05	2.99e-05	4.66e-05	6.02e-05	6.73e-05		C284	0	0	4.85681e-05	0	0	0	0	0	0	3.12711e-06	0	0	0	0	0	0
T285	9.01975e-05	2.63e-05	7.93e-05	0.000114033	0.000108054	8.35769e-05		4.0122e-05	9.01876e-05	0.000104345	0.000122157	0.000196754	4.34e-05	9.61e-05	9.02e-05	0	0.000182834	8.03e-05	9.55e-05	0.000102697	0.00011428	0.000100294	0.000132034		T285	0	6.61068e-06	2.07681e-05	3.85799e-05	0.000113177	0	1.25231e-05	6.62309e-06	0	9.92571e-05	0	1.19231e-05	1.91201e-05	3.07031e-05	1.67171e-05	4.84571e-05
G285	0.000220483	0.000920399	0.000119003	0.000684197	0.000907657	0.000570348		0.00040122	0.000491021	0.000793021	0.000977254	0.000836203	0.000607929	0.00105762	0.000300625	0.000984507	0.000548502	0.000411477	0.000859832	0.000557495	0.00109709	0.000240705	0.000814207		G285	0	0	0.000222673	0.000406907	0.000265855	3.75812e-05	0.000487277	0	0.000414159	0	0	0.000289484	0	0.000526745	0	0.000243859
C285	1.00219e-05	0	1.98e-05	2.28e-05	4.32e-05	1.91644e-05		4.0122e-05	0	2.09e-05	0.000122157	9.84e-05	6.51e-05	3.2e-05	0.000100208	2.59e-05	2.03e-05	5.02e-05	4.78e-05	2.93e-05	0	6.02e-05	4.4e-05		C285	2.09576e-05	0	1.73561e-06	0.000102992	7.92356e-05	4.59356e-05	1.28356e-05	8.10436e-05	6.73561e-06	1.13561e-06	3.10356e-05	2.86356e-05	1.01356e-05	0	4.10356e-05	2.48356e-05
A286	7.01255e-05	0.000128733	3.86e-05	6.73e-05	4.24e-05	6.94317e-05		3.00649e-05	0.000150266	0.000205052	0.000119637	0.00011284	0	6.28e-05	4.01e-05	7.64e-05	5.99e-05	9.03e-05	9.4e-05	0.00010106	4.49e-05	2e-05	0		A286	0	8.08343e-05	0.00013562	5.02056e-05	4.34083e-05	0	0	0	6.9683e-06	0	2.08683e-05	2.45683e-05	3.16283e-05	0	0	0
T286	5.00897e-05	7.72e-05	0.000269937	4.49e-05	2.12e-05	9.26653e-05		7.01515e-05	3.00532e-05	2.05e-05	0	1.61e-05	4.27e-05	0	1e-05	2.55e-05	2e-05	4.01e-05	1.57e-05	5.77e-05	2.25e-05	0	2.16e-05		T286	0	0	0	0	0	0	0	0	0	0	0	0	0	0	0	0
C286	3.00538e-05	0	3.86e-05	0	0	1.37308e-05		1.00216e-05	2.00355e-05	0	2.39275e-05	1.61e-05	2.13e-05	0	3.01e-05	2.55e-05	2e-05	1e-05	1.57e-05	1.44e-05	0	1e-05	0		C286	0	6.3047e-06	0	1.01967e-05	2.36924e-06	7.56924e-06	0	1.63692e-05	1.17692e-05	6.26924e-06	0	1.96924e-06	6.69241e-07	0	0	0
T287	6.02089e-05	2.52e-05	5.79e-05	0.000131886	0.000145554	8.41498e-05		0.000120505	0.00012038	4.02e-05	0.000116877	7.89e-05	0.000125224	6.14e-05	2.01e-05	7.5e-05	0.000117631	7.04e-05	0.000153718	4.25e-05	6.6e-05	6.03e-05	4.23e-05		T287	3.63551e-05	3.62306e-05	0	3.27273e-05	0	4.10742e-05	0	0	0	3.34812e-05	0	6.95682e-05	0	0	0	0
G287	0.000120418	0.000176114	1.93e-05	0.000263771	0.000124761	0.000140873		0.000351473	0.000401268	0.000281249	0.000490884	0.000331539	0.000313061	0.0005216	0.000190598	0.000174952	0.000117631	0.000231207	0.000215206	0.00025525	0.000307855	0.000311311	0.000317272		G287	0.0002106	0.000260395	0.000140376	0.000350011	0.000190666	0.000172188	0.000380727	4.97252e-05	3.40792e-05	0	9.03342e-05	7.43332e-05	0.000114377	0.000166982	0.000170438	0.000176399
C287	2.00696e-05	0	1.93e-05	2.2e-05	4.16e-05	2.05939e-05		7.02945e-05	8.02536e-05	2.01e-05	7.01262e-05	7.89e-05	2.09e-05	6.14e-05	4.01e-05	2.5e-05	3.92e-05	5.03e-05	3.07e-05	0	0	2.01e-05	0		C287	4.97006e-05	5.96597e-05	0	4.95323e-05	5.83061e-05	3.06072e-07	4.08061e-05	1.95061e-05	4.40607e-06	1.86061e-05	2.97061e-05	1.01061e-05	0	0	0	0
T288	7.02275e-05	9.97e-05	1.92e-05	6.53e-05	6.17e-05	6.32255e-05		5.01384e-05	0.000100325	9.95e-05	4.63822e-05	6.26e-05	6.21e-05	9.11e-05	6.02e-05	7.43e-05	3.88e-05	0.000130548	0.000106641	4.22e-05	0.000109049	8.03e-05	0.000125728		T288	0	3.70995e-05	3.62745e-05	0	0	0	2.78745e-05	0	1.10745e-05	0	6.73225e-05	4.34155e-05	0	4.58235e-05	1.70745e-05	6.25025e-05
G288	0.00016052	9.97e-05	7.69e-05	8.71e-05	0.000226184	0.000130081		0.000200554	0.0004013	0.000179129	0.00062616	0.000406962	0.000310424	0.000242969	0.000290975	0.000148563	0.000194167	0.000180759	0.000137109	0.000126548	0.000239908	0.00022077	0.00035623		G288	7.04727e-05	0.000271219	4.90482e-05	0.000496079	0.000276881	0.000180343	0.000112888	0.000160894	1.84822e-05	6.40862e-05	5.06782e-05	7.02818e-06	0	0.000109827	9.06892e-05	0.000226149
C288	1.00325e-05	0	3.85e-05	2.18e-05	4.11e-05	2.22865e-05		8.02214e-05	0.000140455	1.99e-05	4.63822e-05	4.7e-05	0	3.04e-05	1e-05	2.48e-05	0	1e-05	3.05e-05	0	2.18e-05	1e-05	2.1e-05		C288	5.79349e-05	0.000118169	0	2.40957e-05	2.47135e-05	0	8.1135e-06	0	2.5135e-06	0	0	8.2135e-06	0	0	0	0
A289	1.00204e-05	7.45e-05	5.71e-05	0	0.00010248	4.88201e-05		6.0113e-05	3.00698e-05	5.95e-05	6.93754e-05	4.68e-05	4.13e-05	3.03e-05	5.01e-05	0	5.81e-05	0.000130365	0.000151913	7.01e-05	4.35e-05	5.01e-05	8.37e-05		A289	1.12929e-05	0	1.06799e-05	2.05553e-05	0	0	0	1.27991e-06	0	9.27991e-06	8.15449e-05	0.000103093	2.12799e-05	0	1.27991e-06	3.48799e-05
G289	3.00613e-05	7.45e-05	3.81e-05	0.000238736	0.000143472	0.000104974		1.00188e-05	1.00233e-05	1.98e-05	6.93754e-05	3.12e-05	8.25e-05	0	1e-05	4.93e-05	1.94e-05	1e-05	0.000106339	0.000140217	8.7e-05	1e-05	0.000104583		G289	0	0	0	0	0	0	0	0	0	0	0	1.36513e-06	3.52431e-05	0	0	0
C289	0.000110225	0.000173775	1.9e-05	0	8.2e-05	7.7e-05		0.000290546	0.000501163	0.00021818	0.000323752	0.000468252	0.000206266	0.000181554	0.00030055	2.47e-05	5.81e-05	0.00021059	9.11e-05	0.000224347	4.35e-05	0.000180321	0.000271915		C289	0.000213546	0.000424163	0.00014118	0.000246752	0.000391252	0.000129266	0.000104554	0.00022355	0	0	0.00013359	1.41e-05	0.000147347	0	0.000103321	0.000194915
A290	3.01408e-05	7.01e-05	3.8e-05	4.1e-05	0.000115768	5.90018e-05		4.01063e-05	1.00339e-05	9.38e-05	4.36176e-05	4.46e-05	9.74e-05	0.000113401	7.03e-05	0.000139688	9.14e-05	3.01e-05	0.000143891	3.97e-05	0.000164575	1e-05	0.000118664		A290	0	0	3.47982e-05	0	0	3.83982e-05	5.43992e-05	1.12982e-05	8.06862e-05	3.23982e-05	0	8.48892e-05	0	0.000105573	0	5.96622e-05
G290	5.02346e-05	0.000163655	0.000589443	0.000184434	0.000192946	0.000236143		0	2.00678e-05	0.000131261	0.000174471	0.000104058	0.000175384	5.67e-05	2.01e-05	0.000116406	0.00016448	1e-05	0.00015828	6.62e-05	0.000164575	0	0.000158218		G290	0	0	0	0	0	0	0	0	0	0	0	0	0	0	0	0
C290	0.000140657	0.000233792	0	0.000102463	0.00021224	0.00013783		0.00032085	0.000321085	0.000468788	0.000697882	0.000535157	0.000428716	0.000113401	0.000341242	0.000209531	0.000182755	0.000241061	0.000201448	0.000119231	0.000349722	0.000170676	0.000533987		C290	0.00018302	0.000183255	0.000330958	0.000560052	0.000397327	0.000290886	0	0.000203412	7.17006e-05	4.49246e-05	0.000103231	6.36176e-05	0	0.000211892	3.28456e-05	0.000396157
A291	3.01414e-05	6.82e-05	5.69e-05	6.01e-05	1.88e-05	4.68283e-05		8.04327e-05	9.04141e-05	7.32e-05	4.24493e-05	2.91e-05	5.7e-05	0.00013776	6.03e-05	0.000228634	0.000107467	0.000110748	0.000140766	0.00012974	8.02e-05	0.000140801	3.87e-05		A291	3.36045e-05	4.35858e-05	2.63717e-05	0	0	1.01717e-05	9.09317e-05	1.34717e-05	0.000181806	6.06387e-05	6.39197e-05	9.39377e-05	8.29117e-05	3.33717e-05	9.39727e-05	0
T291	7.03298e-05	9.09e-05	0.000151665	0.000200192	5.65e-05	0.000113917		0.000130703	6.02761e-05	0.000182929	0.000127348	0.000204037	9.5e-05	5.51e-05	7.04e-05	0.000342951	0.000161201	9.06e-05	0.000140766	0.000155688	0.000120262	8.05e-05	0.000173967		T291	1.67858e-05	0	6.90116e-05	1.34306e-05	9.01196e-05	0	0	0	0.000229034	4.72836e-05	0	2.68486e-05	4.17706e-05	6.34463e-06	0	6.00496e-05
C291	0	2.27e-05	1.9e-05	0	1.88e-05	1.21e-05		2.01082e-05	0	0	4.24493e-05	0	1.9e-05	0	1.01e-05	0	1.79e-05	1.01e-05	2.82e-05	2.59e-05	2e-05	2.01e-05	3.87e-05		C291	8.00818e-06	0	0	3.03493e-05	0	6.9e-06	0	0	0	5.8e-06	0	1.61e-05	1.38e-05	7.9e-06	8e-06	2.66e-05
T292	8.0339e-05	9.07e-05	0.000244554	4.01e-05	0.000112988	0.000113736		0.000180708	9.04023e-05	0.000109481	0.000127102	8.72e-05	0.000227316	0.000109981	6.03e-05	6.84e-05	0.000250036	0.00015082	9.84e-05	2.59e-05	0.000100028	7.03e-05	0.000134942		T292	6.69722e-05	0	0	1.33663e-05	0	0.00011358	0	0	0	0.0001363	3.70838e-05	0	0	0	0	2.12058e-05
G292	0.000230975	0.000271955	3.76e-05	0.000360483	0.000338964	0.000247995		0.000451771	0.000441967	0.000474418	0.000317756	0.000421236	0.00018943	0.000247457	0.000351547	0.000364539	0.000357194	0.000281532	0.000478173	0.000220207	0.000380106	0.000401857	0.00030844		G292	0.000203776	0.000193971	0.000226423	6.97609e-05	0.000173241	0	0	0.000103552	0.000116544	0.000109199	3.35367e-05	0.000230178	0	0.000132111	0.000153862	6.04447e-05
C292	3.01271e-05	4.53e-05	0	8.01e-05	0	3.11054e-05		6.02361e-05	4.01788e-05	0	6.35512e-05	5.81e-05	1.89e-05	0	5.02e-05	0	0	2.01e-05	8.44e-05	0	4e-05	2.01e-05	0		C292	2.91307e-05	9.07337e-06	0	3.24458e-05	2.69946e-05	0	0	1.90946e-05	0	0	0	5.32946e-05	0	8.89457e-06	0	0
A293	8.03027e-05	2.24e-05	3.75e-05	7.85e-05	9.25e-05	6.22405e-05		0.0001504	0.00015056	7.2e-05	4.18629e-05	0.000129132	0.000112288	8.14e-05	7.03e-05	8.98e-05	7.03e-05	9.04e-05	0.000152289	8.94e-05	5.92e-05	7.02e-05	7.62e-05		A293	8.81595e-05	8.83195e-05	9.75945e-06	0	6.68915e-05	5.00475e-05	1.91595e-05	8.05945e-06	2.75595e-05	8.05945e-06	2.81595e-05	9.00485e-05	2.71595e-05	0	7.95945e-06	1.39595e-05
T293	0.000110416	2.24e-05	0.000131192	5.89e-05	0.000110943	8.67703e-05		0.00018048	0.00015056	0.000108056	0.000125589	7.17e-05	0.000112288	5.43e-05	8.03e-05	4.49e-05	8.79e-05	7.03e-05	8.31e-05	0.000127782	5.92e-05	2.01e-05	9.52e-05		T293	9.37098e-05	6.37898e-05	2.12857e-05	3.88184e-05	0	2.55177e-05	0	0	0	1.12975e-06	0	0	4.10117e-05	0	0	8.42975e-06
C293	0	0	5.62e-05	3.93e-05	0	1.91e-05		0	1.00373e-05	0	0	0	0	0	3.01e-05	4.49e-05	1.76e-05	2.01e-05	0	0	0	0	0		C293	0	0	0	0	0	0	0	1.1e-05	2.58e-05	0	1e-06	0	0	0	0	0
A294	0.000100274	0.000111749	0.000202414	9.8e-05	9.23e-05	0.000120947		0.00017037	0.000110302	0	6.273e-05	7.17e-05	0.000130866	0.000108419	4.01e-05	8.96e-05	0.000175642	6.02e-05	0.000110612	8.94e-05	9.87e-05	0.000100266	9.51e-05		A294	4.94224e-05	0	0	0	0	9.91865e-06	0	0	0	5.46947e-05	0	0	0	0	0	0
T294	4.01095e-05	4.47e-05	3.68e-05	0.000137169	7.38e-05	6.65157e-05		2.00435e-05	5.01374e-05	3.6e-05	0	2.87e-05	3.74e-05	5.42e-05	0.000100271	0	3.51e-05	3.01e-05	6.91e-05	3.83e-05	7.89e-05	4.01e-05	1.9e-05		T294	0	0	0	0	0	0	0	3.37553e-05	0	0	0	2.5843e-06	0	1.23843e-05	0	0
C294	0	0	9.2e-05	3.92e-05	1.85e-05	2.994e-05		1.00217e-05	1.00275e-05	0	0	0	0	0	1e-05	0	0	2.01e-05	2.77e-05	0	0	3.01e-05	0		C294	0	0	0	0	0	0	0	0	0	0	0	0	0	0	1.6e-07	0
A295	6.01884e-05	2.21e-05	7.36e-05	3.88e-05	5.48e-05	4.98977e-05		8.02077e-05	4.01027e-05	0.000106855	0	0.000113414	9.25e-05	2.68e-05	3.01e-05	6.66e-05	0.000191394	7.03e-05	0	1.26e-05	3.9e-05	4.01e-05	3.76e-05		A295	3.03101e-05	0	5.69573e-05	0	6.35163e-05	4.26023e-05	0	0	1.67023e-05	0.000141496	2.04023e-05	0	0	0	0	0
G295	5.0157e-05	4.41e-05	0.000184071	9.7e-05	0.000109659	9.69974e-05		0	0	5.34e-05	4.13582e-05	1.42e-05	5.55e-05	2.68e-05	2.01e-05	8.88e-05	0.000139196	0	6.85e-05	5.05e-05	5.85e-05	4.01e-05	5.64e-05		G295	0	0	0	0	0	0	0	0	0	4.21986e-05	0	0	0	0	0	0
C295	0.000100314	0.000198645	0	7.76e-05	0.000182765	0.000111865		0.000110286	0.000280719	0.000178091	0.000496298	0.000297712	0.000314419	0.000107046	0.000160525	0.000177573	0.000121796	0.000301202	0.000301465	0.000151586	0.000272968	0.000190616	0.000395108		C295	0	0.000168854	6.62262e-05	0.000384434	0.000185847	0.000202554	0	4.86602e-05	6.57082e-05	9.9312e-06	0.000189337	0.0001896	3.97212e-05	0.000161103	7.87512e-05	0.000283243
A296	6.01443e-05	2.2e-05	0.000145643	1.94e-05	0	4.94375e-05		0.000100228	8.01748e-05	0.000106667	2.06449e-05	0.000113278	5.54e-05	2.67e-05	5.01e-05	2.22e-05	8.7e-05	6.02e-05	2.73e-05	2.52e-05	9.74e-05	8.02e-05	0		A296	5.079e-05	3.07373e-05	5.72295e-05	0	6.38405e-05	5.96253e-06	0	6.62531e-07	0	3.75625e-05	1.07625e-05	0	0	4.79625e-05	3.07625e-05	0
G296	0	2.2e-05	0.000163848	5.82e-05	1.82e-05	5.24496e-05		2.00455e-05	1.00218e-05	7.11e-05	0	1.42e-05	0	2.67e-05	2e-05	8.87e-05	8.7e-05	2.01e-05	4.1e-05	5.05e-05	1.95e-05	1e-05	3.76e-05		G296	0	0	1.86504e-05	0	0	0	0	0	3.62504e-05	3.45504e-05	0	0	0	0	0	0
C296	0.000160385	0.000154134	3.64e-05	0.000193904	0.000273608	0.000163686		0.000250569	0.000260568	0.000213333	0.000289029	0.000339833	0.000277131	0.000293929	0.000220514	0.000266176	0.000173907	0.000220653	0.000314491	0.00025234	0.000292267	0.000270614	0.000150229		C296	8.68826e-05	9.68819e-05	4.96468e-05	0.000125343	0.000176147	0.000113445	0.000130243	5.68278e-05	0.00010249	1.02208e-05	5.69668e-05	0.000150805	8.86538e-05	0.000128581	0.000106928	0
A297	9.01262e-05	0	3.64e-05	5.74e-05	9e-05	5.47852e-05		9.01406e-05	0.00018027	7e-05	4.06678e-05	0.000125691	0	7.89e-05	0.000120181	6.57e-05	0	0.000140302	4.05e-05	3.74e-05	0.000153492	5.01e-05	0.0001112		A297	3.53554e-05	0.000125485	1.52148e-05	0	7.09058e-05	0	2.41148e-05	6.53958e-05	1.09148e-05	0	8.55168e-05	0	0	9.87068e-05	0	5.64148e-05
T297	3.00421e-05	0.000151686	1.82e-05	0.00011483	0.000107972	8.4546e-05		0	4.00601e-05	8.75e-05	2.03339e-05	8.38e-05	3.64e-05	5.26e-05	7.01e-05	0.000131441	0.000102955	7.02e-05	5.4e-05	9.96e-05	9.59e-05	2e-05	7.41e-05		T297	0	0	2.95399e-06	0	0	0	0	0	4.6895e-05	1.8409e-05	0	0	1.5054e-05	1.1354e-05	0	0
C297	0	2.17e-05	0	5.74e-05	1.8e-05	1.942e-05		2.00312e-05	2.003e-05	1.75e-05	0	0	3.64e-05	0	0	2.19e-05	8.58e-05	0	0	3.74e-05	0	2e-05	3.71e-05		C297	6.11249e-07	6.10045e-07	0	0	0	1.698e-05	0	0	2.48e-06	6.638e-05	0	0	1.798e-05	0	5.8e-07	1.768e-05
T298	0.000150225	2.16e-05	0.000180245	0.000114451	7.18e-05	0.000107664		0.000110206	0.000100139	0.000244828	0.000101492	6.98e-05	1.82e-05	0.000131306	0.000120185	0.000109149	0.000171271	0.000110276	9.43e-05	7.46e-05	0.000134308	0.000100179	0.000129572		T298	2.54182e-06	0	0.000137164	0	0	0	2.36417e-05	1.25207e-05	1.48473e-06	6.36067e-05	2.61173e-06	0	0	2.66437e-05	0	2.19077e-05
G298	0.000170255	0.000302853	0.000126172	0.000209828	0.000233293	0.00020848		0.000260487	0.000390543	0.000472168	0.000263879	0.000223202	0.000272678	0.000131306	0.000300463	0.000458425	0.000188398	0.000270677	0.000148244	0.000161611	0.000172682	0.000250448	0.000296165		G298	5.20068e-05	0.000182063	0.000263688	5.53987e-05	1.47217e-05	6.41977e-05	0	9.19827e-05	0.000249945	0	6.21967e-05	0	0	0	4.19677e-05	8.76847e-05
C298	3.00451e-05	2.16e-05	0.000126172	1.91e-05	0	3.93834e-05		3.00562e-05	3.00418e-05	0	0	0	0	0	0	0	0	3.01e-05	4.04e-05	2.49e-05	0	2e-05	5.55e-05		C298	0	0	0	0	0	0	0	0	0	0	0	1.01659e-06	0	0	0	1.61166e-05
T299	0.00013025	6.34e-05	0	7.48e-05	5.28e-05	6.425e-05		7.01445e-05	8.01619e-05	0.000102796	5.95699e-05	5.47e-05	0.000142366	5.13e-05	8.01e-05	0.000149848	0.000151316	9.03e-05	0.00011909	8.54e-05	7.52e-05	7.02e-05	3.63e-05		T299	5.89448e-06	1.59119e-05	3.8546e-05	0	0	7.8116e-05	0	1.585e-05	8.5598e-05	8.7066e-05	2.605e-05	5.484e-05	2.115e-05	1.095e-05	5.94998e-06	0
G299	0.000250481	0.000359226	5.41e-05	0.000243168	0.000299048	0.000241205		0.000420867	0.00040081	0.000565378	0.000258136	0.000382985	0.000355916	0.000384882	0.000220379	0.000214069	0.000184942	0.000230699	0.000251413	0.000158633	0.000470004	0.000320776	0.000272381		G299	0.000179662	0.000159605	0.000324173	1.69317e-05	0.00014178	0.000114711	0.000143677	0	0	0	0	1.02084e-05	0	0.000228799	7.95714e-05	3.11764e-05
C299	5.00962e-05	8.45e-05	0	3.74e-05	3.52e-05	4.14392e-05		6.01239e-05	3.00607e-05	0	1.98566e-05	8.21e-05	1.78e-05	5.13e-05	6.01e-05	2.14e-05	3.36e-05	1e-05	7.94e-05	1.22e-05	3.76e-05	5.01e-05	5.45e-05		C299	1.86846e-05	0	0	0	4.06608e-05	0	9.86076e-06	1.86608e-05	0	0	0	3.79608e-05	0	0	8.66076e-06	1.30608e-05
A300	9.04414e-05	4.2e-05	5.39e-05	0.000130519	5.26e-05	7.38921e-05		0.000100338	0.000160693	6.83e-05	1.97679e-05	0.0001498	0.000141683	0.000102171	8.03e-05	4.26e-05	5.02e-05	0.00016077	0.000118724	0.000121535	7.48e-05	0.000160585	0.000199045		A300	2.64461e-05	8.68005e-05	0	0	7.59079e-05	6.77909e-05	2.82789e-05	6.40793e-06	0	0	8.68779e-05	4.48319e-05	4.76429e-05	9.07929e-07	8.66929e-05	0.000125153
T300	2.00981e-05	0.000126133	0.000215773	0.000149165	8.77e-05	0.000119774		3.01014e-05	7.0303e-05	0.000102375	9.88396e-05	6.81e-05	8.86e-05	2.55e-05	3.01e-05	8.53e-05	0.00015064	6.03e-05	6.6e-05	7.29e-05	0.000112263	9.03e-05	1.81e-05		T300	0	0	0	0	0	0	0	0	0	3.08662e-05	0	0	0	0	0	0
C300	1.0049e-05	2.1e-05	7.19e-05	0	0	2.05898e-05		0	4.01731e-05	0	1.97679e-05	0	0	0	1e-05	2.13e-05	0	3.01e-05	3.96e-05	1.22e-05	0	3.01e-05	1.81e-05		C300	0	1.95833e-05	0	0	0	0	0	0	7.10192e-07	0	9.51019e-06	1.90102e-05	0	0	9.51019e-06	0
A301	0.0001202	8.38e-05	0.000105796	3.72e-05	0.000122373	9.38737e-05		0.000160319	0.000150267	1.7e-05	0.000216886	5.43e-05	0.000158803	0.000152722	7.01e-05	6.38e-05	5.01e-05	0.000150374	0.000144682	6.05e-05	0.000130434	0.000130236	7.21e-05		A301	6.64453e-05	5.63938e-05	0	0.000123012	0	6.49293e-05	5.88483e-05	0	0	0	5.65003e-05	5.08083e-05	0	3.65603e-05	3.63623e-05	0
T301	3.00499e-05	8.38e-05	0.000476081	3.72e-05	0	0.000125426		8.01595e-05	7.01248e-05	0.000102039	1.97169e-05	5.43e-05	8.82e-05	2.55e-05	5.01e-05	4.25e-05	0.000150376	4.01e-05	7.89e-05	4.84e-05	0.000111801	7.01e-05	3.6e-05		T301	0	0	0	0	0	0	0	0	0	2.49498e-05	0	0	0	0	0	0
C301	4.00665e-05	0	5.29e-05	1.86e-05	0	2.23133e-05		1.00199e-05	3.00535e-05	0	0	4.08e-05	0	5.09e-05	0	2.13e-05	1.67e-05	1e-05	0	1.21e-05	0	0	0		C301	0	7.74019e-06	0	0	1.84867e-05	0	2.85867e-05	0	0	0	0	0	0	0	0	0
A302	1.00262e-05	6.2e-05	5.2e-05	7.35e-05	3.46e-05	4.64252e-05		9.01542e-05	5.00902e-05	5.04e-05	0.000116668	2.68e-05	6.97e-05	5.01e-05	3.01e-05	0	4.94e-05	8.02e-05	0.000103962	5.99e-05	0.000128736	7.01e-05	8.9e-05		A302	4.37289e-05	3.66493e-06	3.97477e-06	7.02427e-05	0	2.32748e-05	3.67477e-06	0	0	2.97477e-06	3.37748e-05	5.75368e-05	1.34748e-05	8.23108e-05	2.36748e-05	4.25748e-05
G302	0	6.2e-05	5.2e-05	9.18e-05	0.000121055	6.5371e-05		2.00343e-05	5.00902e-05	3.36e-05	7.77786e-05	0	0.000104517	0	0	0.000105018	6.59e-05	0	7.8e-05	0.000107756	1.84e-05	3.01e-05	0		G302	0	0	0	1.24076e-05	0	3.9146e-05	0	0	3.9647e-05	5.29e-07	0	1.2629e-05	4.2385e-05	0	0	0
C302	0.000100262	0.000165269	1.73e-05	0.000183645	0.000172936	0.000127882		0.000260445	0.000170307	0.000234974	9.72233e-05	0.000134208	0.000104517	0.000100243	0.000240498	0.000252043	0.000115348	0.000170435	0.000142948	0.000143675	9.2e-05	0.000350733	0.000160279		C302	0.000132563	4.24242e-05	0.000107092	0	6.32566e-06	0	0	0.000112616	0.000124161	0	4.25527e-05	1.50657e-05	1.57927e-05	0	0.000222851	3.23967e-05
T303	1.00198e-05	0	5.12e-05	1.83e-05	0	1.5904e-05		7.01389e-05	0	0	3.87725e-05	0	0	5e-05	0	2.09e-05	0	2.01e-05	0	1.19e-05	1.83e-05	1e-05	0		T303	5.42349e-05	0	0	2.28685e-05	0	0	3.4096e-05	0	4.99603e-06	0	4.19603e-06	0	0	2.39603e-06	0	0
G303	0.000180357	0.00016469	0.00015345	0.000219869	0.0001549	0.000174653		0.000240476	0.000320487	0.000318056	0.00031018	0.000441838	0.000295406	0.000249975	0.000180279	0.000167277	0.000246589	0.000330983	0.000245958	0.000262198	0.000293287	0.000240522	0.000266326		G303	6.58229e-05	0.000145834	0.000143403	0.000135526	0.000267185	0.000120753	7.53218e-05	5.62578e-06	0	7.19358e-05	0.00015633	7.13048e-05	8.75448e-05	0.000118634	6.58688e-05	9.16728e-05
C303	0	0	1.71e-05	1.83e-05	1.72e-05	1.052e-05		1.00198e-05	3.00457e-05	3.35e-05	1.93862e-05	1.34e-05	0	2.5e-05	1e-05	2.09e-05	3.29e-05	4.01e-05	0	0	0	0	1.78e-05		C303	0	1.95257e-05	2.298e-05	8.86623e-06	2.88e-06	0	1.448e-05	0	1.038e-05	2.238e-05	2.958e-05	0	0	0	0	7.28e-06
T304	9.0259e-05	8.18e-05	0.000101358	5.46e-05	8.55e-05	8.27034e-05		7.01333e-05	9.02753e-05	8.32e-05	5.77167e-05	6.66e-05	5.17e-05	0	3.01e-05	6.24e-05	0.000196075	4.01e-05	9e-05	4.74e-05	1.82e-05	3.01e-05	3.53e-05		T304	0	7.57193e-06	4.96591e-07	0	0	0	0	0	0	0.000113372	0	7.29659e-06	0	0	0	0
G304	0.000140403	0.000245444	0.00016893	9.1e-05	0.000188179	0.000166791		0.000170324	0.000280857	9.99e-05	0.000269345	0.000292849	0.000293245	0.000173818	0.000170472	0.000166313	0.000179736	9.03e-05	0.000128622	0.000165753	0.000273304	0.000170388	0.000246779		G304	3.53242e-06	0.000114065	0	0.000102554	0.000126058	0.000126454	7.02681e-06	3.68081e-06	0	1.29448e-05	0	0	0	0.000106513	3.59681e-06	7.99878e-05
C304	3.00863e-05	0	5.07e-05	1.82e-05	1.71e-05	2.32173e-05		5.00952e-05	5.0153e-05	9.99e-05	1.92389e-05	3.99e-05	3.45e-05	4.97e-05	5.01e-05	2.08e-05	4.9e-05	1e-05	0	2.37e-05	1.82e-05	2e-05	1.76e-05		C304	2.68779e-05	2.69357e-05	7.66827e-05	0	1.66827e-05	1.12827e-05	2.64827e-05	2.68827e-05	0	2.57827e-05	0	0	4.8273e-07	0	0	0
A305	0	2.04e-05	5.06e-05	7.25e-05	6.82e-05	4.234e-05		9.02057e-05	7.0198e-05	9.96e-05	1.91828e-05	9.3e-05	5.16e-05	2.48e-05	5.01e-05	6.22e-05	4.89e-05	4.01e-05	0.000128329	3.54e-05	0.000181617	5.01e-05	1.76e-05		A305	4.78657e-05	2.7858e-05	5.726e-05	0	5.066e-05	9.26e-06	0	7.76e-06	1.986e-05	6.56e-06	0	8.5989e-05	0	0.000139277	7.76e-06	0
T305	6.01679e-05	6.12e-05	0.0001011	9.06e-05	0.000102283	8.30702e-05		0.000100229	0.000110311	8.3e-05	0.00013428	6.64e-05	0.000189189	9.9e-05	0.000180428	4.15e-05	4.89e-05	0.000110334	8.98e-05	4.72e-05	7.26e-05	4.01e-05	0.000123051		T305	1.71583e-05	2.72409e-05	0	5.12095e-05	0	0.000106119	1.59298e-05	9.73578e-05	0	0	2.72638e-05	6.72983e-06	0	0	0	3.99808e-05
G305	0	0	5.06e-05	0	0	1.012e-05		0	2.00566e-05	0	0	0	0	0	2e-05	4.15e-05	1.63e-05	1e-05	0	1.18e-05	0	1e-05	1.76e-05		G305	0	9.93656e-06	0	0	0	0	0	9.88e-06	3.138e-05	6.18e-06	0	0	1.68e-06	0	0	7.48e-06
A306	9.15844e-05	6.13e-05	7.98e-05	3.63e-05	1.71e-05	5.72169e-05		6.04717e-05	0.000101363	3.32e-05	0	6.65e-05	5.16e-05	0	5.07e-05	4.15e-05	9.79e-05	7.09e-05	2.57e-05	3.55e-05	1.82e-05	4.04e-05	1.76e-05		A306	3.2548e-06	4.41465e-05	0	0	9.28312e-06	0	0	0	0	4.06831e-05	1.36831e-05	0	0	0	0	0
T306	0.000244225	0.000102085	0.000207499	9.08e-05	8.53e-05	0.000145982		0.000100786	0.000263545	8.31e-05	7.68167e-05	6.65e-05	0.000137713	0.000173319	0.000141871	0.000166103	0.000146817	6.08e-05	0.000115683	0.0001655	0.000127187	0.000252742	0.000228575		T306	0	0.000117563	0	0	0	0	2.73372e-05	0	2.01212e-05	8.35181e-07	0	0	1.95182e-05	0	0.00010676	8.25932e-05
G306	0	4.08e-05	0.000143653	0	1.71e-05	4.03106e-05		0	2.02727e-05	1.66e-05	0	0	3.44e-05	0	0	2.08e-05	1.63e-05	1.01e-05	3.86e-05	0	5.45e-05	0	3.52e-05		G306	0	0	0	0	0	0	0	0	0	0	0	0	0	1.41894e-05	0	0
A307	7.1484e-05	6.13e-05	7.79e-05	3.64e-05	3.42e-05	5.62568e-05		9.08155e-05	9.15509e-05	6.66e-05	0	3.99e-05	0.000120567	0	8.13e-05	6.23e-05	4.9e-05	0.000101576	0.000102869	1.18e-05	9.09e-05	5.06e-05	7.04e-05		A307	3.45587e-05	3.52941e-05	1.03432e-05	0	0	6.43102e-05	0	2.50432e-05	6.0432e-06	0	4.53192e-05	4.66122e-05	0	3.46432e-05	0	1.41432e-05
G307	1.0212e-05	6.13e-05	0.000109102	3.64e-05	6.84e-05	5.70828e-05		4.03625e-05	1.01723e-05	1.66e-05	0	6.65e-05	3.44e-05	2.48e-05	4.06e-05	2.08e-05	4.9e-05	1.02e-05	0	2.37e-05	9.09e-05	0	0		G307	0	0	0	0	9.4172e-06	0	0	0	0	0	0	0	0	3.38172e-05	0	0
C307	0.000122544	0.000245023	4.68e-05	0.000182037	0.000119691	0.000143219		0.000292628	0.000315342	0.000266219	0.000383973	0.000332398	0.000327253	0.000148555	0.000223466	0.000249392	0.000163377	0.000294572	0.000282889	0.000284121	5.45e-05	0.000172061	0.000369504		C307	0.000149409	0.000172123	0.000123	0.000240754	0.000189179	0.000184034	5.336e-06	8.0247e-05	0.000106173	2.0158e-05	0.000151353	0.00013967	0.000140902	0	2.8842e-05	0.000226285
A308	7.09536e-05	2.03e-05	4.67e-05	1.81e-05	5.1e-05	4.14107e-05		9.04414e-05	0.000171884	3.31e-05	3.82621e-05	6.63e-05	0.000102985	2.47e-05	4.04e-05	0	8.13e-05	2.02e-05	6.41e-05	3.54e-05	1.81e-05	2.01e-05	5.26e-05		A308	4.90306e-05	0.000130473	0	0	2.48893e-05	6.15743e-05	0	0	0	3.98893e-05	0	2.26893e-05	0	0	0	1.11893e-05
T308	0.000152043	0	0.00038925	0.000126713	8.51e-05	0.000150621		0.00021103	0.00012133	0.000182252	0.000248704	0.00015901	0.000223134	9.87e-05	0.000121114	0.000124213	0.000113862	0.000181868	0.00010248	0.000212334	0.000126779	0.000130934	0.00014025		T308	6.04085e-05	0	3.16307e-05	9.80826e-05	8.38871e-06	7.25127e-05	0	0	0	0	3.12467e-05	0	6.17127e-05	0	0	0
G308	0	0	1.56e-05	7.24e-05	3.4e-05	2.44e-05		0	2.02216e-05	0	5.73932e-05	1.33e-05	3.43e-05	2.47e-05	2.02e-05	0	4.88e-05	2.02e-05	1.28e-05	2.36e-05	0	1.01e-05	1.75e-05		G308	0	0	0	3.29932e-05	0	9.9e-06	3e-07	0	0	2.44e-05	0	0	0	0	0	0
A309	0.000201434	0.0001629	1.53e-05	0.000253895	0.000272893	0.000181284		0.000320776	0.000462791	0.000298408	0.000268132	0.000344947	0.000223126	0.000222233	0.00018065	0.000227946	0.000325828	0.000321912	0.000243559	0.000330997	0.000235601	0.000230537	0.000210526		A309	0.000139492	0.000281506	0.000117124	8.6848e-05	0.000163663	4.18416e-05	4.09486e-05	0	4.66616e-05	0.000144544	0.000140628	6.22746e-05	0.000149713	5.43166e-05	4.92526e-05	2.92416e-05
T309	6.04303e-05	0.000122175	0.000122553	0.000108812	0.000102335	0.000103261		8.01941e-05	4.02427e-05	4.97e-05	0.000114914	2.65e-05	3.43e-05	7.41e-05	2.01e-05	8.29e-05	6.52e-05	5.03e-05	3.85e-05	5.91e-05	0.000126862	4.01e-05	7.02e-05		T309	0	0	0	1.16529e-05	0	0	0	0	0	0	0	0	0	2.36009e-05	0	0
C309	1.00717e-05	0	1.53e-05	1.81e-05	0	8.69434e-06		6.01456e-05	5.03033e-05	4.97e-05	0	3.98e-05	1.72e-05	0	0	0	1.63e-05	2.01e-05	1.28e-05	1.18e-05	7.25e-05	1e-05	3.51e-05		C309	5.14512e-05	4.1609e-05	4.10057e-05	0	3.11057e-05	8.50566e-06	0	0	0	7.60566e-06	1.14057e-05	4.10566e-06	3.10566e-06	6.38057e-05	1.30566e-06	2.64057e-05
A310	1.00147e-05	6.11e-05	0.00019888	9.08e-05	0.000102337	9.26263e-05		1.00176e-05	8.01603e-05	0.000116138	9.56956e-05	0.000119414	1.72e-05	4.94e-05	5.01e-05	2.07e-05	0.000130493	4.01e-05	0.000102731	0.000129961	5.44e-05	0	5.26e-05		A310	0	0	2.35117e-05	3.06927e-06	2.67877e-05	0	0	0	0	3.78667e-05	0	1.01047e-05	3.73347e-05	0	0	0
T310	0.000130191	0.000183154	1.53e-05	3.63e-05	8.53e-05	9.00491e-05		0.000160282	0.000170341	0.000165912	0.000114835	0.000119414	8.58e-05	4.94e-05	0.000140215	8.3e-05	6.52e-05	0.000150337	6.42e-05	7.09e-05	7.25e-05	7.01e-05	8.77e-05		T310	7.0233e-05	8.02916e-05	7.58629e-05	2.47857e-05	2.93649e-05	0	0	5.01659e-05	0	0	6.02879e-05	0	0	0	0	0
G310	0	0	1.53e-05	0	1.71e-05	6.48e-06		0	1.002e-05	1.66e-05	1.91391e-05	0	0	2.47e-05	2e-05	0	0	0	2.57e-05	5.91e-05	1.81e-05	1e-05	1.75e-05		G310	0	3.54004e-06	1.012e-05	1.26591e-05	0	0	1.822e-05	1.352e-05	0	0	0	1.922e-05	5.262e-05	1.162e-05	3.52e-06	1.102e-05
T311	0.000100269	0.000139104	0.000106234	5.33e-05	6.67e-05	9.31213e-05		9.0212e-05	5.01057e-05	1.62e-05	9.36628e-05	0.000117206	0.000117673	9.65e-05	7.02e-05	0.000121689	3.2e-05	0.000120417	3.77e-05	8.11e-05	0.000177343	4.01e-05	0.000188851		T311	0	0	0	5.41433e-07	2.40847e-05	2.45517e-05	3.37866e-06	0	2.85677e-05	0	2.72957e-05	0	0	8.42217e-05	0	9.57297e-05
G311	0.000130349	0.000158976	6.07e-05	0.000177554	0.00015007	0.00013553		0.000290683	0.000330698	0.000227151	0.000374651	0.000221389	0.000453881	0.000337585	0.000140316	0.000243378	0.000271626	0.00019066	0.000276573	0.000220254	0.000407888	0.00030083	0.000274692		G311	0.000155153	0.000195168	9.16211e-05	0.000239121	8.58591e-05	0.000318351	0.000202055	4.78613e-06	0.000107848	0.000136096	5.51301e-05	0.000141043	8.47241e-05	0.000272358	0.0001653	0.000139162
C311	7.01881e-05	3.97e-05	7.59e-05	8.88e-05	8.34e-05	7.15976e-05		3.00707e-05	1.00211e-05	0	1.87326e-05	1.3e-05	3.36e-05	2.41e-05	3.01e-05	4.06e-05	7.99e-05	6.02e-05	7.54e-05	5.8e-05	0.000106406	5.01e-05	0.00010301		C311	0	0	0	0	0	0	0	0	0	8.30238e-06	0	3.80238e-06	0	3.48084e-05	0	3.14124e-05
A312	1.00828e-05	1.98e-05	3.03e-05	5.3e-05	3.33e-05	2.92966e-05		2.00783e-05	0	0	0	5.19e-05	1.68e-05	0	0	4.05e-05	0	0	2.51e-05	0	7.07e-05	2.01e-05	3.42e-05		A312	0	0	0	0	2.26034e-05	0	0	0	1.12034e-05	0	0	0	0	4.14034e-05	0	4.90344e-06
T312	0.000151242	0.000138683	4.54e-05	0.000141273	0.000116405	0.000118601		5.01958e-05	0.000100637	4.85e-05	0.00018671	7.78e-05	3.35e-05	0.000240292	5.03e-05	0.000101272	4.77e-05	3.02e-05	0.000125327	0.000161683	7.07e-05	9.05e-05	6.84e-05		T312	0	0	0	6.81094e-05	0	0	0.000121691	0	0	0	0	6.72646e-06	4.30825e-05	0	0	0
G312	3.02483e-05	7.92e-05	0.000181714	1.77e-05	0	6.17725e-05		0	2.01274e-05	0	3.7342e-05	0	0	4.81e-05	0	0	0	0	1.25e-05	0	0	0	1.71e-05		G312	0	0	0	0	0	0	0	0	0	0	0	0	0	0	0	0
A313	2.01049e-05	3.92e-05	5.97e-05	0	0	2.3801e-05		2.0056e-05	1.0034e-05	1.6e-05	0	1.29e-05	0	0	2.01e-05	0	1.58e-05	3.01e-05	3.72e-05	0	1.75e-05	2.01e-05	0		A313	0	0	0	0	0	0	0	0	0	0	6.29901e-06	1.3399e-05	0	0	0	0
G313	0	3.92e-05	4.48e-05	0.000297437	0.000131709	0.000102629		1.0028e-05	2.0068e-05	0.000112124	0.000110998	0.000128859	0.0001163	0.000237648	2.01e-05	0.000100114	0.000173471	4.02e-05	0.000173796	0.000194622	0.000193016	0	0.000152729		G313	0	0	9.4948e-06	8.36886e-06	2.62298e-05	1.36708e-05	0.000135019	0	0	7.08418e-05	0	7.11668e-05	9.19928e-05	9.03868e-05	0	5.00998e-05
C313	0.000231207	0.000196232	4.48e-05	0.000227452	0.000246954	0.000189329		0.000260727	0.000351191	0.000384424	0.000277495	0.000335034	0.000332287	0.000118824	0.000240988	0.000260297	9.46e-05	0.00032156	0.000248281	0.000228967	0.000245657	0.000331359	0.000237578		C313	7.13984e-05	0.000161862	0.000195095	8.81662e-05	0.000145705	0.000142958	0	5.1659e-05	7.0968e-05	0	0.000132231	5.8952e-05	3.9638e-05	5.6328e-05	0.00014203	4.8249e-05
A314	6.02017e-05	0	0.000268324	5.23e-05	0	7.61651e-05		4.01107e-05	0.000120356	0	3.69399e-05	3.86e-05	8.3e-05	0	0.000100253	2e-05	7.86e-05	5.02e-05	4.95e-05	9.14e-05	7e-05	4.01e-05	5.09e-05		A314	0	4.41911e-05	0	0	0	6.83486e-06	0	2.40879e-05	0	2.43486e-06	0	0	1.52349e-05	0	0	0
G314	2.00672e-05	9.78e-05	0.000238511	0.000122124	0.000147703	0.000125241		2.00554e-05	1.00297e-05	9.6e-05	0.00012929	9.01e-05	0.000132738	7.12e-05	0	9.99e-05	0.00012579	0	0.00014864	0.000182732	5.25e-05	2.01e-05	0.0001017		G314	0	0	0	4.0486e-06	0	7.49695e-06	0	0	0	5.48955e-07	0	2.3399e-05	5.7491e-05	0	0	0
C314	0.000160538	0.00011741	1.49e-05	0.000261693	6.56e-05	0.000124028		0.000290803	0.000531573	0.000432007	0.000572568	0.000450364	0.000348438	0.000237287	0.000160404	0.000279726	0.000188685	0.00029108	0.0001858	0.00015989	0.000350067	0.000230701	0.0003051		C314	0.000166774	0.000407545	0.000307979	0.00044854	0.000326336	0.00022441	0.000113259	3.63758e-05	0.000155698	6.46568e-05	0.000167052	6.17718e-05	3.58618e-05	0.000226039	0.000106673	0.000181072
A315	5.00686e-05	3.9e-05	5.85e-05	6.96e-05	0.000114555	6.63447e-05		8.01154e-05	8.00977e-05	4.78e-05	7.36092e-05	6.41e-05	9.92e-05	4.73e-05	9.01e-05	7.96e-05	3.14e-05	1e-05	6.18e-05	0.000125369	5.23e-05	4.01e-05	8.45e-05		A315	1.37706e-05	1.3753e-05	0	7.26453e-06	0	3.28553e-05	0	2.37553e-05	1.32553e-05	0	0	0	5.90243e-05	0	0	1.81553e-05
G315	0	0	0.000263416	1.74e-05	0	5.61632e-05		0	0	6.37e-05	0	2.56e-05	3.31e-05	2.36e-05	0	7.96e-05	6.27e-05	1e-05	3.71e-05	4.56e-05	5.23e-05	0	0		G315	0	0	7.5368e-06	0	0	0	0	0	2.34368e-05	6.5368e-06	0	0	0	0	0	0
C315	0.000320439	0.000292637	5.85e-05	0.000191351	9.82e-05	0.000192225		0.000500721	0.000700855	0.000749052	0.000772897	0.000461621	0.000396845	0.000307249	0.000280367	0.00051766	0.000517623	0.000540985	0.000605312	0.000307724	0.000593296	0.000460636	0.000405405		C315	0.000308496	0.00050863	0.000556827	0.000580672	0.000269396	0.00020462	0.000115024	8.81416e-05	0.000325435	0.000325398	0.00034876	0.000413087	0.000115499	0.000401071	0.000268411	0.00021318
A316	5.00596e-05	1.92e-05	0.000131291	0.000102689	8.05e-05	7.67479e-05		2.00226e-05	5.00716e-05	3.14e-05	1.81268e-05	3.8e-05	8.14e-05	6.98e-05	0	0.00019634	6.18e-05	8.02e-05	4.87e-05	3.37e-05	6.86e-05	8.01e-05	6.66e-05		A316	0	0	0	0	0	4.65209e-06	0	0	0.000119592	0	3.45209e-06	0	0	0	3.35209e-06	0
T316	4.00477e-05	9.59e-05	7.29e-05	8.56e-05	6.44e-05	7.17695e-05		0.000100113	0.000100143	4.71e-05	0.000163141	8.87e-05	8.14e-05	6.98e-05	0.000170218	5.89e-05	7.72e-05	9.02e-05	7.3e-05	7.87e-05	0.000137257	9.01e-05	0.000116538		T316	2.83436e-05	2.83737e-05	0	9.13715e-05	1.69305e-05	9.63047e-06	0	9.84485e-05	0	5.43047e-06	1.84305e-05	1.23047e-06	6.93047e-06	6.54875e-05	1.83305e-05	4.47685e-05
G316	0	0.000134251	0	0	0	2.68502e-05		1.00113e-05	0	1.57e-05	0	1.27e-05	0	0	1e-05	1.96e-05	1.54e-05	0	3.65e-05	1.12e-05	1.72e-05	4.01e-05	3.33e-05		G316	0	0	0	0	0	0	0	0	0	0	0	9.6498e-06	0	0	1.32498e-05	6.4498e-06
A317	7.09191e-05	0.000133575	4.36e-05	6.81e-05	1.6e-05	6.64388e-05		5.03119e-05	5.05331e-05	0	5.40628e-05	3.78e-05	1.62e-05	4.63e-05	9.09e-05	3.91e-05	3.08e-05	9.09e-05	1.21e-05	6.72e-05	1.71e-05	8.07e-05	3.31e-05		A317	0	0	0	0	0	0	0	2.44612e-05	0	0	2.44612e-05	0	7.61178e-07	0	1.42612e-05	0
T317	0.000243151	0.000248068	0.00013093	0.000204228	0.000256295	0.000216534		0.000181123	0.000151599	0.000218324	0.000108126	0.000138674	0.00017804	9.25e-05	0.000151433	0.000175805	0.000153782	0.000272579	0.000230111	0.000235154	0.000204995	0.000141232	0.000182246		T317	0	0	1.78955e-06	0	0	0	0	0	0	0	5.60446e-05	1.35766e-05	1.86196e-05	0	0	0
G317	1.01313e-05	0	0	0	0	2.02626e-06		1.00624e-05	1.01066e-05	1.56e-05	0	2.52e-05	0	2.31e-05	1.01e-05	0	3.08e-05	2.02e-05	3.63e-05	5.6e-05	1.71e-05	1.01e-05	0		G317	8.03613e-06	8.08036e-06	1.35737e-05	0	2.31737e-05	0	2.10737e-05	8.07374e-06	0	2.87737e-05	1.81737e-05	3.42737e-05	5.39737e-05	1.50737e-05	8.07374e-06	0
T318	0.00013215	0.000133639	8.62e-05	0.000136586	0.000192753	0.000136266		7.04956e-05	0.000111409	0.000156043	0.000144175	0.000189098	4.86e-05	0	0.000151734	0.000117438	0.000138668	9.1e-05	4.85e-05	0.000112144	0.000153809	3.03e-05	0		T318	0	0	1.97774e-05	7.9097e-06	5.28324e-05	0	0	1.54684e-05	0	2.40238e-06	0	0	0	1.75434e-05	0	0
G318	0.000213473	0.000171821	4.31e-05	0.00015366	0.000144564	0.000145324		0.000342407	0.000354484	0.000202856	0.000684833	0.000466441	0.000356298	0.000254482	0.000252891	0.000176156	0.000184891	0.000343935	0.000181915	0.000325218	0.000341799	0.000303223	0.000232192		G318	0.000197083	0.000209161	5.75324e-05	0.000539509	0.000321117	0.000210974	0.000109158	0.000107567	3.08324e-05	3.95674e-05	0.000198611	3.65914e-05	0.000179894	0.000196475	0.000157899	8.68684e-05
C318	0.00013215	0.000114548	0.000158071	8.54e-05	8.03e-05	0.000114094		1.00708e-05	3.03844e-05	1.56e-05	5.40657e-05	0	1.62e-05	4.63e-05	0.000171966	0.000117438	0.000107853	0.000111273	8.49e-05	7.85e-05	0.00010254	0.000111182	8.29e-05		C318	0	0	0	0	0	0	0	5.78722e-05	3.34418e-06	0	0	0	0	0	0	0
A319	4.06285e-05	0	0	8.46e-05	9.56e-05	4.41657e-05		7.04544e-05	0.000101082	0.000123931	1.79115e-05	6.27e-05	8.04e-05	9.2e-05	2.02e-05	7.76e-05	9.17e-05	6.07e-05	6.02e-05	7.79e-05	0.000118955	6.06e-05	4.94e-05		A319	2.62887e-05	5.69159e-05	7.97653e-05	0	1.85343e-05	3.62343e-05	4.78343e-05	0	3.34343e-05	4.75343e-05	1.65343e-05	1.60343e-05	3.37343e-05	7.47893e-05	1.64343e-05	5.2343e-06
G319	0	3.79e-05	0.000186169	0.000203035	0.000127413	0.000110903		1.00649e-05	3.03245e-05	9.29e-05	3.5823e-05	8.78e-05	3.22e-05	6.9e-05	1.01e-05	9.7e-05	0.000122208	3.03e-05	0	0.000100161	3.4e-05	0	9.89e-05		G319	0	0	0	0	0	0	0	0	0	1.13046e-05	0	0	0	0	0	0
C319	7.10999e-05	0	0	0.000135357	7.96e-05	5.72114e-05		0.000211363	0.000151622	7.75e-05	0.000197027	0.000200642	0.000112582	2.3e-05	0.000161427	0.000135819	0.000183312	0.000171853	0.000204595	0.000133548	0.000186929	0.000121118	0.000115336		C319	0.000154152	9.4411e-05	2.02886e-05	0.000139815	0.000143431	5.53706e-05	0	0.000104216	7.86076e-05	0.000126101	0.000114642	0.000147384	7.63366e-05	0.000129718	6.39066e-05	5.81246e-05
A320	5.07779e-05	1.9e-05	1.42e-05	6.78e-05	0.000127354	5.58264e-05		4.02702e-05	7.07149e-05	7.75e-05	3.58134e-05	8.77e-05	0	2.3e-05	9.08e-05	5.83e-05	1.53e-05	5.06e-05	6.02e-05	5.57e-05	0.000102025	4.04e-05	4.95e-05		A320	0	1.48885e-05	2.16736e-05	0	3.18736e-05	0	0	3.49736e-05	2.47362e-06	0	0	4.37362e-06	0	4.61986e-05	0	0
G320	7.10891e-05	1.9e-05	9.97e-05	0.00013557	4.78e-05	7.46318e-05		3.02027e-05	2.02043e-05	3.1e-05	1.79067e-05	6.27e-05	0	0	2.02e-05	0	4.59e-05	4.04e-05	1.2e-05	2.23e-05	5.1e-05	6.06e-05	0		G320	0	0	0	0	0	0	0	0	0	0	0	0	0	0	0	0
C320	0.000142178	0.000113727	5.7e-05	0.00013557	0.000191031	0.000127901		0.000181216	0.000313166	0.000635363	0.000250694	0.000375968	0.000353931	0.000252897	0.000332957	0.000310686	0.000153125	0.000313454	0.000216724	0.000200461	0.000255063	0.000323147	0.000428619		C320	5.33147e-05	0.000185265	0.000507462	0.000122793	0.000248067	0.00022603	0.000124996	0.000205056	0.000182785	2.52238e-05	0.000185553	8.88228e-05	7.25598e-05	0.000127162	0.000195246	0.000300718
A321	0.000301051	0.00024659	5.68e-05	0.000153142	0.000319453	0.000215407		0.000502159	0.000481773	0.0003104	0.000394534	0.000427034	0.000435014	0.000460299	0.000381488	0.000429051	0.000291787	0.000392437	0.000446898	0.00030142	0.000340159	0.000421958	0.000396053		A321	0.000286752	0.000266366	9.49929e-05	0.000179127	0.000211627	0.000219607	0.000244892	0.000166081	0.000213644	7.63799e-05	0.00017703	0.000231491	8.60129e-05	0.000124752	0.000206551	0.000180646
T321	3.01051e-05	3.79e-05	5.68e-05	8.51e-05	4.79e-05	5.1561e-05		0.000160691	0.000140517	7.76e-05	7.17334e-05	0.000113038	8.06e-05	0.00023015	9.04e-05	3.9e-05	0.000122858	0.000171062	0.000181175	0.000133964	0.000153072	0.000190886	0.000264035		T321	0.00010913	8.89561e-05	2.6039e-05	2.01724e-05	6.1477e-05	2.9039e-05	0.000178589	3.8839e-05	0	7.1297e-05	0.000119501	0.000129614	8.2403e-05	0.000101511	0.000139325	0.000212474
C321	4.01401e-05	0.000113811	2.84e-05	1.7e-05	4.79e-05	4.94502e-05		2.00864e-05	1.00369e-05	6.21e-05	1.79334e-05	6.28e-05	4.83e-05	0	2.01e-05	1.95e-05	6.14e-05	0	2.42e-05	1.12e-05	0	2.01e-05	8.25e-05		C321	0	0	1.26498e-05	0	1.33498e-05	0	0	0	0	1.19498e-05	0	0	0	0	0	3.30498e-05
A322	1.00412e-05	5.67e-05	2.84e-05	5.08e-05	7.96e-05	4.51082e-05		6.01811e-05	0.000100412	4.64e-05	5.36375e-05	6.26e-05	4.82e-05	4.59e-05	5.02e-05	0.000116532	4.59e-05	8.04e-05	0.000132403	4.45e-05	0.000118787	0.000100387	0		A322	1.50729e-05	5.53035e-05	1.29177e-06	8.52928e-06	1.74918e-05	3.09177e-06	7.91766e-07	5.09177e-06	7.14238e-05	7.91766e-07	3.52918e-05	8.72948e-05	0	7.36788e-05	5.52788e-05	0
T322	0.000110453	3.78e-05	9.95e-05	0.000101631	0.000175173	0.000104911		0.000200604	0.00026107	0.000247647	0.000160913	8.77e-05	0.000208933	0.000137681	0.000110372	5.83e-05	0.000107039	0.000160751	0.000180549	0.000122353	0.000220604	0.000110426	0.000131679		T322	9.56924e-05	0.000156159	0.000142736	5.60012e-05	0	0.000104022	3.27696e-05	5.46063e-06	0	2.12763e-06	5.58396e-05	7.56376e-05	1.74416e-05	0.000115693	5.51463e-06	2.67676e-05
G322	4.01647e-05	0	2.84e-05	3.39e-05	0	2.04929e-05		3.00906e-05	4.01647e-05	0	0	0	1.61e-05	0	1e-05	1.94e-05	1.53e-05	3.01e-05	4.81e-05	1.11e-05	0	0	0		G322	9.59764e-06	1.96717e-05	0	0	0	0	0	0	0	0	9.60706e-06	2.76071e-05	0	0	0	0
A323	7.02677e-05	0.00011252	1.42e-05	0.000185874	9.51e-05	9.55923e-05		4.0128e-05	9.03107e-05	6.15e-05	0.000106572	0.000124685	9.57e-05	9.1e-05	3.01e-05	0.00017396	0.000213265	4.02e-05	8.39e-05	0.000199375	0.000151745	4.02e-05	0.000147112		A323	0	0	0	1.09796e-05	2.90927e-05	1.07656e-07	0	0	7.83677e-05	0.000117673	0	0	0.000103783	5.61527e-05	0	5.15197e-05
T323	0.000260994	0.00011252	0.000113936	0.000236566	0.000110958	0.000166995		0.000120384	0.000160552	9.22e-05	0.000142096	0.000286776	0.000334982	9.1e-05	0.000271171	0.000154631	0.000243732	0.000181026	0.000311456	0.000166146	0.000185466	0.000220888	0.000212495		T323	0	0	0	0	0.000119781	0.000167987	0	0.000104176	0	7.67371e-05	1.40311e-05	0.000144461	0	1.84711e-05	5.38931e-05	4.55001e-05
G323	4.0153e-05	9.38e-05	0.000227872	3.38e-05	0	7.9125e-05		2.0064e-05	2.0069e-05	0	0	2.49e-05	3.19e-05	0	0	1.93e-05	0	6.03e-05	4.79e-05	0	6.74e-05	1e-05	3.27e-05		G323	0	0	0	0	0	0	0	0	0	0	0	0	0	0	0	0
T324	0.000170575	9.3e-05	8.5e-05	1.67e-05	4.7e-05	8.2455e-05		0.000120256	0.000150391	9.15e-05	0.00012337	8.66e-05	7.91e-05	0.000135443	0.000110318	0.000267866	7.54e-05	0.000130497	5.94e-05	0.000109836	8.36e-05	0.000140411	4.87e-05		T324	3.78012e-05	6.7936e-05	9.04503e-06	4.09148e-05	4.14503e-06	0	5.2988e-05	2.7863e-05	0.000185411	0	4.8042e-05	0	2.7381e-05	1.14503e-06	5.7956e-05	0
G324	0.000160541	0.000204693	0.000141671	8.34e-05	0.000188132	0.000155687		0.000250534	0.000350912	0.00015243	0.000264364	0.000346269	0.000395651	0.00029346	0.000280809	0.000420932	0.00018096	0.000240918	0.000142536	0.000274589	0.000150436	0.000361058	0.000210988		G324	9.48462e-05	0.000195225	0	0.000108676	0.000190582	0.000239964	0.000137773	0.000125122	0.000265245	2.52726e-05	8.52306e-05	0	0.000118902	0	0.000205371	5.53006e-05
C324	0	3.72e-05	4.25e-05	8.34e-05	1.57e-05	3.576e-05		5.01067e-05	6.01564e-05	0	1.76243e-05	1.24e-05	0	4.51e-05	8.02e-05	0	6.03e-05	1e-05	3.56e-05	0	6.69e-05	2.01e-05	3.25e-05		C324	1.43467e-05	2.43964e-05	0	0	0	0	9.34e-06	4.444e-05	0	2.454e-05	0	0	0	3.114e-05	0	0
T325	0.000110222	7.44e-05	0.000368826	9.99e-05	3.13e-05	0.00013693		8.01234e-05	6.01046e-05	3.05e-05	5.28113e-05	0	6.32e-05	0	5.01e-05	7.64e-05	1.51e-05	3.01e-05	9.48e-05	7.68e-05	0.000183728	4.01e-05	4.86e-05		T325	0	0	0	0	0	0	0	0	0	0	0	0	0	4.67985e-05	0	0
G325	0.000200403	0.000223119	7.09e-05	8.33e-05	0.000297754	0.000175095		0.000170262	0.000320558	0.000654939	0.000264057	0.000321027	0.000379285	0.000292958	0.00021044	0.000191091	0.000376568	0.000220578	0.000248977	0.000351062	0.000384159	0.000220448	0.000291729		G325	0	0.000145463	0.000479844	8.89615e-05	0.000145932	0.00020419	0.000117863	3.53448e-05	1.59958e-05	0.000201473	4.54828e-05	7.38818e-05	0.000175967	0.000209064	4.53528e-05	0.000116634
C325	3.00604e-05	0	7.09e-05	1.67e-05	0	2.35321e-05		3.00463e-05	2.00349e-05	0	5.28113e-05	4.94e-05	0	0	1e-05	0	6.03e-05	2.01e-05	3.56e-05	5.49e-05	1.67e-05	1e-05	3.24e-05		C325	6.51419e-06	0	0	2.92792e-05	2.58679e-05	0	0	0	0	3.67679e-05	0	1.20679e-05	3.13679e-05	0	0	8.86792e-06
A326	5.00851e-05	0	0.000113732	3.33e-05	7.82e-05	5.50634e-05		3.00511e-05	4.00605e-05	4.56e-05	3.51877e-05	0	4.74e-05	2.25e-05	1e-05	3.81e-05	1.51e-05	6.01e-05	2.37e-05	3.29e-05	6.67e-05	6.01e-05	1.62e-05		A326	0	0	0	0	0	0	0	0	0	0	5.03657e-06	0	0	1.16366e-05	5.03657e-06	0
T326	0.00027046	0.000148564	0.000127948	5e-05	0.000172106	0.000153816		0.000240409	0.000280423	0.000304257	8.79693e-05	0.000197431	0.000157978	0.000112646	0.000290526	0.000343217	0.000195712	0.000240585	0.000189535	0.000153319	0.00020023	0.000180339	0.000259059		T326	8.65931e-05	0.000126608	0.000150441	0	4.36154e-05	4.16244e-06	0	0.00013671	0.000189401	4.18964e-05	8.67694e-05	3.57194e-05	0	4.64144e-05	2.65234e-05	0.000105243
G326	3.00511e-05	3.71e-05	0	3.33e-05	0	2.00902e-05		1.0017e-05	0	3.04e-05	1.75939e-05	2.47e-05	1.58e-05	2.25e-05	1e-05	3.81e-05	3.01e-05	2e-05	4.74e-05	0	6.67e-05	0	4.86e-05		G326	0	0	1.03098e-05	0	4.60978e-06	0	2.40978e-06	0	1.80098e-05	1.00098e-05	0	2.73098e-05	0	4.66098e-05	0	2.85098e-05
A327	0.000100132	3.68e-05	0.000111179	3.3e-05	6.2e-05	6.86222e-05		7.01157e-05	0.000130217	4.52e-05	5.23332e-05	0.000159084	0.00017236	0.000133758	0.000250373	1.89e-05	0.000149535	0.000240546	0.000176238	0.000173909	0.000132247	0.000140252	6.42e-05		A327	1.49346e-06	6.15952e-05	0	0	9.04618e-05	0.000103738	6.51358e-05	0.000181751	0	8.09128e-05	0.000171924	0.000107616	0.000105287	6.36248e-05	7.16298e-05	0
T327	3.00397e-05	5.51e-05	0.000222358	6.6e-05	7.75e-05	9.01995e-05		2.00331e-05	9.01506e-05	1.51e-05	1.74444e-05	0.000110135	3.13e-05	2.23e-05	5.01e-05	0	5.98e-05	9.02e-05	7.05e-05	1.09e-05	6.61e-05	2e-05	6.42e-05		T327	0	0	0	0	1.99355e-05	0	0	0	0	0	4.69532e-10	0	0	0	0	0
C327	1.00132e-05	0	9.73e-05	1.65e-05	0	2.47626e-05		1.00165e-05	1.00167e-05	4.52e-05	0	2.45e-05	0	0	1e-05	0	0	1e-05	0	0	1.65e-05	1e-05	3.21e-05		C327	0	0	2.04374e-05	0	0	0	0	0	0	0	0	0	0	0	0	7.33736e-06
T328	7.0267e-05	0.000110855	2.77e-05	5e-05	0.00014068	7.99004e-05		0.00015067	0.000100392	0.000272727	3.50742e-05	0.000172478	9.45e-05	8.96e-05	7.03e-05	0.000133792	0.000120596	0.000140837	5.91e-05	9.86e-05	1.66e-05	0.000140685	3.23e-05		T328	7.07701e-05	2.04911e-05	0.000192827	0	9.25776e-05	1.45996e-05	9.6996e-06	0	5.38916e-05	4.06956e-05	6.09366e-05	0	1.86996e-05	0	6.07846e-05	0
G328	0.000150572	0.000221709	9.68e-05	0.000283291	0.000171942	0.000184863		0.000200894	0.000331292	0.000272727	0.000298131	0.000147838	0.000173291	0.0001793	0.000281156	0.000248471	6.03e-05	0.000130777	0.000177318	0.000197167	0.000166102	0.000160783	0.00016146		G328	1.60311e-05	0.000146429	8.78642e-05	0.000113268	0	0	0	9.62932e-05	6.36082e-05	0	0	0	1.23042e-05	0	0	0
C328	2.00763e-05	1.85e-05	2.77e-05	5e-05	3.13e-05	2.95153e-05		6.02682e-05	4.01566e-05	1.52e-05	8.76855e-05	8.62e-05	4.73e-05	4.48e-05	6.02e-05	0.000114679	0.000120596	6.04e-05	9.46e-05	3.29e-05	6.64e-05	5.02e-05	9.69e-05		C328	3.07529e-05	1.06414e-05	0	5.81702e-05	5.66847e-05	1.77847e-05	1.52847e-05	3.06847e-05	8.51637e-05	9.10807e-05	3.08847e-05	6.50847e-05	3.38474e-06	3.68847e-05	2.06847e-05	6.73847e-05
A329	3.01914e-05	3.65e-05	4.11e-05	0.000131648	7.72e-05	6.33279e-05		6.03161e-05	6.03549e-05	5.99e-05	3.46777e-05	3.66e-05	6.23e-05	0.000155269	9.05e-05	3.77e-05	2.98e-05	8.06e-05	2.34e-05	2.16e-05	0.000180909	6.04e-05	0.000175764		A329	0	0	0	0	0	0	9.19411e-05	2.71721e-05	0	0	1.72721e-05	0	0	0.000117581	0	0.000112436
G329	1.00638e-05	0.000182598	0.000150763	0.00024684	0.000108031	0.000139659		2.01054e-05	1.00591e-05	0.000224712	8.66942e-05	0.00020715	0.000109078	0.000110907	6.04e-05	0.000245112	0.000163917	2.01e-05	0.000175346	0.000118986	0.000164463	4.03e-05	6.39e-05		G329	0	0	8.50528e-05	0	6.74908e-05	0	0	0	0.000105453	2.42578e-05	0	3.56868e-05	0	2.48038e-05	0	0
C329	4.02552e-05	0.000146079	0.000178175	6.58e-05	3.09e-05	9.22418e-05		0.000241264	0.00024142	0.000269655	0.000190727	0.000255892	0.000186992	0.000221813	0.00021127	0.000150838	0.000134114	0.000181349	0.000151967	0.000205521	0.000230248	0.000130883	0.000207721		C329	0.000149022	0.000149178	0.000177413	9.84853e-05	0.00016365	9.47502e-05	0.000129571	0.000119028	5.85962e-05	4.18722e-05	8.91072e-05	5.97252e-05	0.000113279	0.000138006	3.86412e-05	0.000115479
A330	3.01605e-05	9.08e-05	5.47e-05	6.55e-05	4.61e-05	5.74521e-05		5.0219e-05	2.00918e-05	0.000178548	0	8.48e-05	4.65e-05	4.41e-05	1.01e-05	3.75e-05	2.96e-05	4.03e-05	1.16e-05	8.61e-05	1.63e-05	1.01e-05	4.77e-05		A330	0	0	0.000121096	0	2.73479e-05	0	0	0	0	0	0	0	2.86479e-05	0	0	0
G330	0	9.08e-05	0.000109405	0.000229118	7.68e-05	0.000101225		3.01314e-05	3.01377e-05	1.49e-05	8.61802e-05	3.63e-05	9.3e-05	4.41e-05	0	0.000112459	7.41e-05	0	5.81e-05	8.61e-05	9.81e-05	4.02e-05	7.95e-05		G330	0	0	0	0	0	0	0	0	1.12344e-05	0	0	0	0	0	0	0
C330	0.000100535	0.000108929	0.000205134	1.64e-05	6.15e-05	9.84996e-05		0.000180788	0.000311423	8.93e-05	0.000310249	0.000169609	0.000185905	0.000110307	0.000291604	0.000187431	0.00011855	0.000151094	0.000116263	0.000139905	0.000130768	0.000150874	0.000127123		C330	8.22887e-05	0.000212924	0	0.000211749	7.11094e-05	8.74054e-05	1.18074e-05	0.000193104	8.89314e-05	2.00504e-05	5.25944e-05	1.77634e-05	4.14054e-05	3.22684e-05	5.23744e-05	2.86234e-05
A331	4.01324e-05	5.44e-05	2.73e-05	1.63e-05	9.2e-05	4.60265e-05		4.00974e-05	0.000100318	0.000118926	5.16111e-05	3.63e-05	0.000154641	0	8.03e-05	5.61e-05	7.4e-05	0.000140705	8.12e-05	3.22e-05	4.9e-05	8.03e-05	0		A331	0	5.42915e-05	7.28995e-05	5.58464e-06	0	0.000108615	0	3.42735e-05	1.00735e-05	2.79735e-05	9.46785e-05	3.51735e-05	0	2.97351e-06	3.42735e-05	0
G331	1.00331e-05	7.25e-05	5.46e-05	6.53e-05	7.66e-05	5.58066e-05		0	0	2.97e-05	3.44074e-05	4.84e-05	6.19e-05	4.41e-05	0	5.61e-05	5.92e-05	1.01e-05	2.32e-05	5.37e-05	3.27e-05	2.01e-05	4.75e-05		G331	0	0	0	0	0	6.09338e-06	0	0	2.93378e-07	3.39338e-06	0	0	0	0	0	0
C331	0.000150497	0.000145046	0.000231936	0.000163313	0.000153254	0.000168809		0.000431047	0.000300954	0.000193254	0.0004645	0.000302371	0.000139177	0.000220318	0.000200775	0.000168388	1.48e-05	0.000140705	0.000197133	0.00021488	0.000179692	0.000190698	0.000253598		C331	0.000262238	0.000132145	2.44449e-05	0.000295691	0.000133562	0	5.15089e-05	3.19659e-05	0	0	0	2.83239e-05	4.60709e-05	1.08829e-05	2.18889e-05	8.47889e-05
T332	0.000160337	3.62e-05	4.03e-05	6.53e-05	3.07e-05	6.65673e-05		0.00015038	9.02201e-05	1.48e-05	0.000137559	0.000277677	0.00017001	2.2e-05	7.02e-05	9.36e-05	0.00010353	0.000130512	4.64e-05	4.3e-05	0.000114245	9.03e-05	9.51e-05		T332	8.38131e-05	2.36528e-05	0	7.09913e-05	0.00021111	0.000103443	0	3.63266e-06	2.70327e-05	3.69627e-05	6.39447e-05	0	0	4.76777e-05	2.37327e-05	2.85327e-05
G332	0.00029061	0.000253462	4.03e-05	0.000277397	0.000153332	0.00020302		0.000320812	0.000320783	0.000504878	0.000429871	0.000217313	0.000262743	0.000417748	0.00021055	0.000299581	0.000236641	0.000271063	0.000139273	0.000182697	0.000261131	0.000511473	0.000380373		G332	0.000117791	0.000117762	0.000301858	0.000226851	1.42927e-05	5.97227e-05	0.000214728	7.52974e-06	9.65607e-05	3.36207e-05	6.80427e-05	0	0	5.81107e-05	0.000308453	0.000177353
C332	1.0021e-05	0	6.72e-05	8.16e-05	4.6e-05	4.09642e-05		4.01015e-05	6.01468e-05	0	1.71948e-05	0	3.09e-05	0	2.01e-05	7.49e-05	7.4e-05	4.02e-05	2.32e-05	4.3e-05	3.26e-05	0	0.000110942		C332	0	1.91825e-05	0	0	0	0	0	0	3.39358e-05	3.30358e-05	0	0	2.03579e-06	0	0	6.99778e-05
A333	2.03108e-05	1.81e-05	4.01e-05	4.88e-05	1.53e-05	2.85222e-05		4.02864e-05	5.06257e-05	1.48e-05	1.71585e-05	3.62e-05	0	4.39e-05	1.01e-05	0	7.37e-05	0	0	1.07e-05	1.63e-05	2.02e-05	6.32e-05		A333	1.17643e-05	2.21036e-05	0	0	7.67785e-06	0	1.53778e-05	0	0	4.51778e-05	0	0	0	0	0	3.46778e-05
T333	0.000121865	0.000108442	0.000240629	6.5e-05	4.58e-05	0.000116347		7.05013e-05	0.000111377	0.000163023	6.86342e-05	3.62e-05	7.71e-05	0.000153674	0.000131686	0.00016782	5.89e-05	8.11e-05	0.000127266	5.35e-05	8.15e-05	0.000121383	0.000142239		T333	0	0	4.66759e-05	0	0	0	3.73269e-05	1.53389e-05	5.14729e-05	0	0	1.09189e-05	0	0	5.03589e-06	2.58919e-05
G333	0	1.81e-05	0	1.63e-05	0	6.88e-06		1.00716e-05	1.01251e-05	0	0	0	0	0	1.01e-05	5.59e-05	0	3.04e-05	1.16e-05	0	0	0	4.74e-05		G333	3.19161e-06	3.24515e-06	0	0	0	0	0	3.22e-06	4.902e-05	0	2.352e-05	4.72e-06	0	0	0	4.052e-05
A334	5.01857e-05	0.000106585	0.000160632	6.43e-05	1.5e-05	7.93405e-05		0.000100317	9.02835e-05	4.38e-05	8.44267e-05	5.95e-05	3.04e-05	8.63e-05	8.03e-05	7.37e-05	0.000101977	9.05e-05	0.000102875	4.23e-05	3.21e-05	0.000110401	6.23e-05		A334	2.09765e-05	1.0943e-05	0	5.08612e-06	0	0	6.95946e-06	9.59463e-07	0	2.26365e-05	1.11595e-05	2.35345e-05	0	0	3.10605e-05	0
G334	1.00371e-05	3.55e-05	0.00013386	0.000241165	0.000105304	0.000105173		3.00951e-05	7.02205e-05	7.3e-05	0.000151968	0.000178355	6.08e-05	0.000194196	5.02e-05	0.000110501	0.000218522	6.03e-05	0.000171458	0.000126818	0.000144495	3.01e-05	0.000171313		G334	0	0	0	4.67948e-05	7.31818e-05	0	8.90228e-05	0	5.32777e-06	0.000113349	0	6.62848e-05	2.16448e-05	3.93218e-05	0	6.61398e-05
C334	0.000100371	0.000301991	9.37e-05	9.65e-05	6.02e-05	0.000130552		0.000341078	0.000280882	8.76e-05	0.000320821	0.000202136	0.000273677	0.00023735	0.000120486	0.000313087	0.000174818	0.000241201	0.00021718	0.000253635	0.00019266	0.000260947	0.000264756		C334	0.000210525	0.000150329	0	0.000190269	7.15835e-05	0.000143125	0.000106798	0	0.000182535	4.42655e-05	0.000110649	8.66275e-05	0.000123083	6.21075e-05	0.000130395	0.000134204
A335	0.000122003	0.000104239	2.66e-05	7.86e-05	0.000103242	8.69369e-05		0.000110973	0.000233065	7.15e-05	0.000165642	0.000163406	2.98e-05	0.00019001	0.000131792	0	0.000228536	9.13e-05	0.000123311	4.14e-05	3.15e-05	0.000131606	0.000106924		A335	2.40364e-05	0.000146128	0	7.87056e-05	7.64691e-05	0	0.000103073	4.48551e-05	0	0.000141599	4.36314e-06	3.63741e-05	0	0	4.46691e-05	1.99871e-05
T335	3.05008e-05	0.000104239	5.31e-05	0.000141563	0.000117991	8.94788e-05		4.03539e-05	2.02665e-05	1.43e-05	8.28212e-05	2.33e-05	8.94e-05	0	3.04e-05	5.42e-05	5.71e-05	3.04e-05	6.73e-05	0.00010356	4.72e-05	3.04e-05	0.000106924		T335	0	0	0	0	0	0	0	0	0	0	0	0	1.40812e-05	0	0	1.74452e-05
C335	1.01669e-05	3.47e-05	5.31e-05	1.57e-05	0	2.27334e-05		0	1.01333e-05	0	3.31285e-05	0	0	0	1.01e-05	0	4.29e-05	1.01e-05	1.12e-05	1.04e-05	3.15e-05	1.01e-05	3.05e-05		C335	0	0	0	1.03951e-05	0	0	0	0	0	2.01666e-05	0	0	0	8.76661e-06	0	7.76661e-06
A336	7.16545e-05	3.47e-05	2.66e-05	3.13e-05	5.88e-05	4.46109e-05		0.000131288	3.04714e-05	0	0.000132275	1.16e-05	1.49e-05	4.21e-05	0.000112122	3.6e-05	0.000113801	8.14e-05	7.83e-05	2.06e-05	0	7.11e-05	3.05e-05		A336	8.6677e-05	0	0	8.76642e-05	0	0	0	6.75111e-05	0	6.91901e-05	3.67891e-05	3.36891e-05	0	0	2.64891e-05	0
G336	1.02364e-05	0	3.99e-05	6.27e-05	2.94e-05	2.84473e-05		0	2.03143e-05	4.28e-05	4.96032e-05	4.66e-05	0	4.21e-05	0	1.8e-05	4.27e-05	1.02e-05	2.24e-05	9.29e-05	0	4.06e-05	3.05e-05		G336	0	0	1.43527e-05	2.11559e-05	1.81527e-05	0	1.36527e-05	0	0	1.42527e-05	0	0	6.44527e-05	0	1.21527e-05	2.05273e-06
C336	0.000143309	0.000104029	0.00021295	7.83e-05	8.82e-05	0.000125358		0.000403963	0.000335185	0.000370909	0.000281085	0.000232777	0.000342002	0.000168517	0.000224245	0.000197959	0.000184927	0.000305337	0.000201221	0.00029937	0.000141381	0.000253895	0.000304734		C336	0.000278605	0.000209828	0.000245551	0.000155727	0.000107419	0.000216644	4.31594e-05	9.88874e-05	7.26014e-05	5.95694e-05	0.000179979	7.58634e-05	0.000174012	1.60234e-05	0.000128537	0.000179376
A337	7.032e-05	0.000637391	0.000372945	0.00025889	0.000314245	0.000330758		0.000110256	6.01908e-05	0.00047064	0.000560978	0.000304634	0.000648555	0.000856531	0.00014061	0.000455509	0.000346169	9.04e-05	0.000217448	0.000432561	0.000320802	9.03e-05	0.000325921		A337	0	0	0.000139882	0.00023022	0	0.000317797	0.000525773	0	0.000124751	1.54108e-05	0	0	0.000101803	0	0	0
G337	4.01828e-05	0.000771579	9.32e-05	0.00063961	0.000728478	0.00045461		2.00465e-05	1.00318e-05	0.000872069	0.00110593	0.000812357	0.000879153	0.00124401	2.01e-05	0.000683264	0.000567718	2.01e-05	0.000521875	0.000422501	0.000824919	1e-05	0.00074073		G337	0	0	0.000417459	0.000651319	0.000357747	0.000424543	0.000789399	0	0.000228654	0.000113108	0	6.7265e-05	0	0.000370309	0	0.00028612
C337	0.000100457	5.03e-05	2.66e-05	0.000152288	0.000142839	9.44968e-05		0.000300698	0.000461463	0.00023532	0.00062509	0.000462592	0.000302659	0.000163149	0.00028122	0.000157676	0.000180008	0.00022109	0.00022832	0.000211251	0.000152763	0.00028102	0.000177775		C337	0.000206201	0.000366966	0.000140823	0.000530593	0.000368095	0.000208162	6.86522e-05	0.000186723	6.31792e-05	8.55112e-05	0.000126593	0.000133823	0.000116754	5.82662e-05	0.000186523	8.32782e-05
A338	7.03397e-05	0.000100835	5.31e-05	4.6e-05	0.000114595	7.69739e-05		0.000211385	0.000211113	0.000194094	0.000128541	6.81e-05	0.000187926	0.000122687	0.000161019	0.000123157	0.000167012	0.000201818	0.000196464	0.00015177	0.000122459	9.06e-05	0.000207977		A338	0.000134411	0.000134139	0.00011712	5.1567e-05	0	0.000110952	4.57131e-05	8.40451e-05	4.61831e-05	9.00381e-05	0.000124844	0.00011949	7.47961e-05	4.54851e-05	1.36261e-05	0.000131003
T338	6.02912e-05	0.000151253	0.000278829	0.000214536	0.000186217	0.000178225		9.05934e-05	0.000150795	0.000166366	0.000144609	0.000226863	0.000216838	0.000163582	9.06e-05	0.000158345	0.000222683	0.000191727	0.000185549	0.000283303	9.18e-05	7.05e-05	0.000148555		T338	0	0	0	0	4.86378e-05	3.86128e-05	0	0	0	4.44578e-05	1.35018e-05	7.32376e-06	0.000105078	0	0	0
C338	0	0	0	0	0	0		1.00659e-05	1.0053e-05	0	4.82028e-05	0	0	0	3.02e-05	1.76e-05	0	5.05e-05	0	1.01e-05	0	0	0		C338	1.00659e-05	1.0053e-05	0	4.82028e-05	0	0	0	3.02e-05	1.76e-05	0	5.05e-05	0	1.01e-05	0	0	0
A339	0.000200624	9.38e-05	0.000158453	0.000143324	6.71e-05	0.00013266		0.000160509	0.00015046	5.2e-05	0.000120433	0.000180809	9.48e-05	0.000209968	0.000120378	8.26e-05	7.82e-05	0.000180854	0.000265917	8.06e-05	0.000115086	0.000170575	0.000181382		A339	2.78486e-05	1.78002e-05	0	0	4.81488e-05	0	7.73078e-05	0	0	0	4.81938e-05	0.000133257	0	0	3.79148e-05	4.87218e-05
T339	5.0156e-05	0.000109457	0.000224476	8.6e-05	6.71e-05	0.000107438		8.02544e-05	0.000120368	2.6e-05	3.01082e-05	7.45e-05	5.42e-05	5.73e-05	4.01e-05	0.000148633	0.000208542	5.02e-05	6.14e-05	9.06e-05	7.19e-05	9.03e-05	4.19e-05		T339	0	1.29305e-05	0	0	0	0	0	0	4.11952e-05	0.000101104	0	0	0	0	0	0
C339	0	0	6.6e-05	0	4.02e-05	2.124e-05		1.00318e-05	1.00307e-05	3.9e-05	3.01082e-05	1.06e-05	0	0	1e-05	0	0	3.01e-05	2.05e-05	0	1.44e-05	3.01e-05	6.98e-05		C339	0	0	1.776e-05	8.86824e-06	0	0	0	0	0	0	8.86e-06	0	0	0	8.86e-06	4.856e-05
A340	6.02113e-05	9.24e-05	9.15e-05	0.000127342	0.000132601	0.000100811		6.02132e-05	0.000150586	0.000166645	2.97014e-05	0.000157542	0.000160299	0.000112979	6.03e-05	0.000228863	0.00018048	5.03e-05	0.000172431	7.07e-05	0.000170143	3.01e-05	0.000109997		A340	0	4.97749e-05	6.58341e-05	0	5.67311e-05	5.94881e-05	1.21681e-05	0	0.000128052	7.96691e-05	0	7.16201e-05	0	6.93321e-05	0	9.18613e-06
T340	0.000220775	0.00024645	0.000156935	0.000198087	0.000265203	0.00021749		0.000391386	0.000381484	0.000179464	0.000356416	0.000273072	0.000213732	0.000188299	0.000361537	0.000179821	0.000206263	0.000291759	0.00020286	0.000313138	0.0001985	0.000331488	0.000206245		T340	0.000173896	0.000163994	0	0.000138926	5.5582e-05	0	0	0.000144047	0	0	7.4269e-05	0	9.5648e-05	0	0.000113998	0
G340	4.01409e-05	1.54e-05	5.23e-05	0	3.98e-05	2.95282e-05		1.00355e-05	9.03515e-05	1.28e-05	0	2.1e-05	0	0	6.03e-05	3.27e-05	3.87e-05	1.01e-05	6.09e-05	6.06e-05	4.25e-05	0	2.75e-05		G340	0	6.08233e-05	0	0	0	0	0	3.07718e-05	3.17182e-06	9.17182e-06	0	3.13718e-05	3.10718e-05	1.29718e-05	0	0
A341	0.000122228	9.23e-05	3.92e-05	7.05e-05	7.93e-05	8.07056e-05		7.07285e-05	0.00017254	5.12e-05	8.88586e-05	0.000136194	0.000173366	0.000150125	6.11e-05	0.000114219	0.000141348	6.1e-05	0.000162056	0.000141294	8.51e-05	5.08e-05	4.11e-05		A341	0	9.18341e-05	0	8.15297e-06	5.54884e-05	9.26604e-05	6.94194e-05	0	3.35134e-05	6.06424e-05	0	8.13504e-05	6.05884e-05	4.39436e-06	0	0
T341	0.0001426	0.000199929	0.000130593	5.64e-05	0.000119005	0.000129705		0.000181873	0.000223287	0.00014069	0.000103668	0.000240959	0.000186702	9.38e-05	0.000142555	0.000244754	8.99e-05	0.000203453	0.000202571	0.000121109	0.000184314	0.000172563	0.000137138		T341	5.2168e-05	9.35815e-05	1.09847e-05	0	0.000111254	5.69967e-05	0	1.28497e-05	0.000115049	0	7.37477e-05	7.28657e-05	0	5.46087e-05	4.28577e-05	7.43268e-06
G341	1.01857e-05	0	2.61e-05	8.46e-05	0	2.41771e-05		5.05204e-05	2.02988e-05	1.28e-05	1.48098e-05	2.1e-05	1.33e-05	0	0	3.26e-05	2.57e-05	0	7.09e-05	3.03e-05	4.25e-05	0	1.37e-05		G341	2.63432e-05	0	0	0	0	0	0	0	8.42286e-06	1.52286e-06	0	4.67229e-05	6.12286e-06	1.83229e-05	0	0
A342	3.03147e-05	1.53e-05	0	1.41e-05	2.63e-05	1.72029e-05		5.02235e-05	4.02524e-05	5.09e-05	1.47347e-05	3.13e-05	2.65e-05	3.74e-05	3.03e-05	3.25e-05	8.96e-05	4.04e-05	6.07e-05	0	2.82e-05	2.01e-05	1.37e-05		A342	3.30206e-05	2.30494e-05	3.36971e-05	0	1.40971e-05	9.29707e-06	2.01971e-05	1.30971e-05	1.52971e-05	7.23971e-05	2.31971e-05	4.34971e-05	0	1.09971e-05	2.89707e-06	0
G342	3.03147e-05	9.18e-05	0.000156633	0.000267199	0.000302907	0.000169771		2.00894e-05	4.02524e-05	6.36e-05	0.000191551	0.00010418	9.28e-05	0.000168143	2.02e-05	0.000129847	0.000230415	1.01e-05	0.000202337	8.07e-05	0.000155146	5.04e-05	0.000122932		G342	0	0	0	2.17804e-05	0	0	0	0	0	6.06443e-05	0	3.25663e-05	0	0	0	0
C342	0.000151573	0.00021409	2.61e-05	0.000309389	0.000210718	0.000182374		0.000391743	0.000342145	0.000445315	0.000221021	0.000406301	0.00019896	0.000112095	0.000303088	0.000324617	0.000230415	0.000434664	0.000374323	0.000211809	0.000465438	0.000231708	0.000382456		C342	0.000209369	0.000159771	0.000262941	3.86465e-05	0.000223927	1.65859e-05	0	0.000120714	0.000142243	4.80409e-05	0.00025229	0.000191949	2.94349e-05	0.000283064	4.93339e-05	0.000200082
T343	9.04141e-05	0	0.000129378	0.00014027	0.000131289	9.82702e-05		9.0327e-05	9.03605e-05	0.000114456	1.47228e-05	0.000124878	0.000105997	1.87e-05	8.04e-05	0.000113434	2.55e-05	9.05e-05	5.06e-05	5.04e-05	1.41e-05	6.03e-05	5.46e-05		T343	0	0	1.61858e-05	0	2.66078e-05	7.72678e-06	0	0	1.51638e-05	0	0	0	0	0	0	0
G343	8.03681e-05	0.000137484	1.29e-05	0.000112216	0.00011816	9.22256e-05		0.000250908	0.000150601	0.000165325	0.000309178	0.000145691	0.000145746	0.000186612	0.000120557	0.000194458	7.66e-05	0.000110633	9.12e-05	0.000241901	0.000197219	0.00024107	0.00021843		G343	0.000158683	5.83753e-05	7.30994e-05	0.000216953	5.34654e-05	5.35204e-05	9.43864e-05	2.83314e-05	0.000102232	0	1.84074e-05	0	0.000149675	0.000104993	0.000148844	0.000126204
C343	0	1.53e-05	0	2.81e-05	6.56e-05	2.18e-05		1.00363e-05	2.00801e-05	0.00013989	2.94455e-05	3.12e-05	0	1.87e-05	4.02e-05	1.62e-05	2.55e-05	5.03e-05	6.08e-05	3.02e-05	1.41e-05	4.02e-05	0		C343	0	0	0.00011809	7.64554e-06	9.4e-06	0	0	1.84e-05	0	3.7e-06	2.85e-05	3.9e-05	8.4e-06	0	1.84e-05	0
A344	7.02177e-05	8.96e-05	0.000104236	0.000109923	0.000103025	9.54003e-05		0.000120284	3.00683e-05	8.72e-05	8.66251e-05	0.000132673	6.5e-05	0.000146039	9.03e-05	0.000111277	1.25e-05	0.000150586	0.00012088	0.000110487	0.000165948	7.02e-05	5.36e-05		A344	2.48835e-05	0	0	0	3.72727e-05	0	5.06387e-05	0	1.58767e-05	0	5.51857e-05	2.54797e-05	1.50867e-05	7.05477e-05	0	0
G344	2.00622e-05	7.47e-05	7.82e-05	4.12e-05	0.000141659	7.11642e-05		0	0	1.25e-05	5.77501e-05	7.14e-05	5.2e-05	1.83e-05	2.01e-05	0.000143071	0.0001379	1e-05	4.03e-05	3.01e-05	6.91e-05	2.01e-05	4.02e-05		G344	0	0	0	0	2.35761e-07	0	0	0	7.19068e-05	6.67358e-05	0	0	0	0	0	0
C344	5.01555e-05	0	2.61e-05	0.000151145	5.15e-05	5.57801e-05		0.000150355	0.000370842	0.000672562	0.000216563	0.000387814	0.000272926	0.000292077	0.000280826	0.000174864	0.0001379	0.000331289	0.000282053	0.000261152	0.000221263	0.000220664	0.000214236		C344	9.45747e-05	0.000315062	0.000616782	0.000160783	0.000332034	0.000217146	0.000236297	0.000225046	0.000119084	8.21199e-05	0.000275509	0.000226273	0.000205372	0.000165483	0.000164884	0.000158456
A345	0.000100394	2.96e-05	5.14e-05	8.17e-05	0.000114752	7.55691e-05		0.000140471	0.000110418	0.000185256	0.000157456	0.000182323	0.000167625	0.000181081	0.000100389	9.46e-05	0.000223689	0.000100542	0.000120762	7.03e-05	9.61e-05	7.03e-05	0.000159471		A345	6.49015e-05	3.48494e-05	0.000109687	8.18864e-05	0.000106754	9.20559e-05	0.000105512	2.48199e-05	1.90309e-05	0.00014812	2.49729e-05	4.51929e-05	0	2.05309e-05	0	8.39019e-05
T345	5.01968e-05	5.92e-05	0.000115757	0.000108938	8.93e-05	8.46784e-05		8.02689e-05	0.00010038	6.18e-05	2.86283e-05	0.000131678	0.000103154	1.81e-05	2.01e-05	0.00011032	0.000161553	4.02e-05	7.04e-05	4.02e-05	9.61e-05	5.02e-05	5.32e-05		T345	0	1.57021e-05	0	0	4.69996e-05	1.84756e-05	0	0	2.56416e-05	7.68746e-05	0	0	0	1.14216e-05	0	0
C345	1.00394e-05	0	9e-05	0	0	2.00079e-05		4.01345e-05	0	6.18e-05	0	2.03e-05	3.87e-05	5.43e-05	5.02e-05	3.15e-05	4.97e-05	2.01e-05	0	1e-05	0	1e-05	0		C345	2.01266e-05	0	4.17921e-05	0	2.92129e-07	1.86921e-05	3.42921e-05	3.01921e-05	1.14921e-05	2.96921e-05	9.21291e-08	0	0	0	0	0
A346	0.000170481	0.000148229	1.28e-05	5.46e-05	7.66e-05	9.2542e-05		8.02955e-05	0.000220607	0.000111309	1.43408e-05	9.13e-05	6.46e-05	0.00018133	0.000180587	7.89e-05	0.000124646	0.000210907	0.000131158	0.000130862	5.5e-05	0.000100366	0.000106485		A346	0	0.000128065	1.8767e-05	0	0	0	8.8788e-05	8.8045e-05	0	3.2104e-05	0.000118365	3.8616e-05	3.832e-05	0	7.82405e-06	1.3943e-05
T346	7.0198e-05	2.96e-05	8.95e-05	0.000191121	0.000102145	9.65128e-05		4.01477e-05	0.000100276	4.95e-05	7.17041e-05	5.07e-05	9.04e-05	0.000108798	5.02e-05	9.47e-05	0.000149576	0.000120518	8.07e-05	8.05e-05	6.87e-05	9.03e-05	0.000119796		T346	0	3.76297e-06	0	0	0	0	1.22852e-05	0	0	5.30632e-05	2.40052e-05	0	0	0	0	2.32832e-05
C346	0	2.96e-05	0.000127923	0	1.28e-05	3.40646e-05		2.00739e-05	0	4.95e-05	0	0	1.29e-05	0	4.01e-05	0	4.99e-05	0	2.02e-05	3.02e-05	2.75e-05	1e-05	0		C346	0	0	1.54354e-05	0	0	0	0	6.0354e-06	0	1.58354e-05	0	0	0	0	0	0
A347	0.000131883	5.93e-05	2.55e-05	4.09e-05	8.96e-05	6.94367e-05		6.0361e-05	0.00013131	7.42e-05	8.60363e-05	7.1e-05	7.75e-05	0.000108853	4.05e-05	7.89e-05	6.23e-05	9.11e-05	0.000121213	7.04e-05	9.63e-05	7.08e-05	9.31e-05		A347	0	6.18738e-05	4.76334e-06	1.65996e-05	1.56334e-06	8.06334e-06	3.94163e-05	0	9.46334e-06	0	2.16633e-05	5.17763e-05	9.63341e-07	2.68633e-05	1.36334e-06	2.36633e-05
G347	1.01449e-05	4.45e-05	5.11e-05	0.000122818	5.12e-05	5.59526e-05		4.02406e-05	2.02016e-05	4.95e-05	5.73575e-05	6.08e-05	2.58e-05	3.63e-05	1.01e-05	7.89e-05	8.72e-05	2.03e-05	3.03e-05	4.02e-05	1.38e-05	1.01e-05	2.66e-05		G347	0	0	0	1.40496e-06	4.84743e-06	0	0	0	2.29474e-05	3.12474e-05	0	0	0	0	0	0
C347	0.000101449	4.45e-05	6.38e-05	0.000177404	6.4e-05	9.02305e-05		0.000352106	0.000323226	0.000593949	0.000315466	0.000405655	0.000258415	0.000308418	0.000273473	7.89e-05	0.00016199	0.000232897	0.000191921	0.000261391	0.000261442	0.000232779	0.000266127		C347	0.000261875	0.000232995	0.000503718	0.000225236	0.000315424	0.000168184	0.000218187	0.000183242	0	7.17595e-05	0.000142666	0.00010169	0.00017116	0.000171211	0.000142548	0.000175896
A348	5.09326e-05	0	7.67e-05	1.37e-05	6.42e-05	4.11065e-05		3.02252e-05	5.06247e-05	1.24e-05	0	1.02e-05	3.88e-05	1.82e-05	3.05e-05	3.17e-05	3.75e-05	8.13e-05	9.11e-05	1.01e-05	2.76e-05	8.12e-05	1.33e-05		A348	0	9.51819e-06	0	0	0	0	0	0	0	0	4.01935e-05	4.99935e-05	0	0	4.00935e-05	0
T348	0.000122238	0.000193214	0.000191647	0.000164485	0.00012838	0.000159993		0.000161201	0.000222749	0.000148835	0.000315942	0.000162466	0.000168226	0.000127176	0.00023379	6.34e-05	0.00022511	0.00018297	0.000293567	8.06e-05	0.000151572	0.00016241	0.000133371		T348	1.20811e-06	6.27559e-05	0	0.000155949	2.47316e-06	8.23316e-06	0	7.37972e-05	0	6.51172e-05	2.29772e-05	0.000133574	0	0	2.41716e-06	0
G348	1.01865e-05	1.49e-05	1.28e-05	1.37e-05	0	1.03173e-05		5.03753e-05	0	1.24e-05	2.8722e-05	7.11e-05	6.47e-05	0	4.07e-05	1.59e-05	1.25e-05	2.03e-05	3.04e-05	1.01e-05	0	0	0		G348	4.0058e-05	0	2.0827e-06	1.84047e-05	6.07827e-05	5.43827e-05	0	3.03827e-05	5.5827e-06	2.1827e-06	9.9827e-06	2.00827e-05	0	0	0	0
T349	0.000122927	4.45e-05	2.55e-05	5.48e-05	1.28e-05	5.21054e-05		7.0583e-05	0.000101491	0.000136058	7.17257e-05	9.13e-05	3.87e-05	7.25e-05	5.11e-05	0.000126376	0.00012467	9.19e-05	0.000101007	0.000100651	0.000165069	0.000101948	9.32e-05		T349	1.84776e-05	4.93855e-05	8.39526e-05	1.96203e-05	3.91946e-05	0	2.03946e-05	0	7.42706e-05	7.25646e-05	3.97946e-05	4.89016e-05	4.85456e-05	0.000112964	4.98426e-05	4.10946e-05
G349	0.000215122	0.000163161	5.09e-05	0.000177938	0.000166357	0.000154696		0.000191582	0.000385665	0.00044528	0.000516425	0.00025355	0.000284091	0.000380773	0.000347144	0.000142173	0.000299207	0.000194078	0.000353525	0.000261693	0.000550229	0.000336429	0.000186386		G349	3.68869e-05	0.00023097	0.000290584	0.00036173	9.88544e-05	0.000129395	0.000226077	0.000192448	0	0.000144511	3.93824e-05	0.000198829	0.000106997	0.000395533	0.000181733	3.16904e-05
C349	9.21952e-05	2.97e-05	0	2.74e-05	8.96e-05	4.7779e-05		4.03332e-05	3.04473e-05	2.47e-05	7.17257e-05	5.07e-05	5.17e-05	5.44e-05	8.17e-05	1.58e-05	9.97e-05	0.000173648	9.09e-05	9.06e-05	4.13e-05	0.000101948	9.32e-05		C349	0	0	0	2.39467e-05	2.92097e-06	3.92097e-06	6.62097e-06	3.3921e-05	0	5.1921e-05	0.000125869	4.3121e-05	4.2821e-05	0	5.4169e-05	4.5421e-05
A350	0.000111422	0.000103711	8.79e-05	5.47e-05	3.83e-05	7.92065e-05		7.03306e-05	9.06764e-05	1.24e-05	5.73132e-05	0.000152067	7.74e-05	0.000181393	0.000141623	0.000126241	0.000174435	0.000142092	7.07e-05	0.000191282	0.000109822	0.000111291	6.65e-05		A350	0	1.14699e-05	0	0	7.28605e-05	0	0.000102186	6.24165e-05	4.70345e-05	9.52285e-05	6.28855e-05	0	0.000112075	3.06155e-05	3.20845e-05	0
T350	2.02585e-05	0.000103711	0.000163288	0.000163952	2.56e-05	9.53619e-05		1.00472e-05	2.01503e-05	2.47e-05	4.29849e-05	0.000111515	5.16e-05	0	2.02e-05	4.73e-05	4.98e-05	0	4.04e-05	6.04e-05	2.75e-05	4.05e-05	6.65e-05		T350	0	0	0	0	1.61531e-05	0	0	0	0	0	0	0	0	0	0	0
C350	4.0517e-05	0	0.000251212	0	0	5.83458e-05		1.00472e-05	0	1.24e-05	0	1.01e-05	1.29e-05	0	0	3.16e-05	2.49e-05	0	0	0	0	2.02e-05	1.33e-05		C350	0	0	0	0	0	0	0	0	0	0	0	0	0	0	0	0
A351	9.07899e-05	0.000264461	0.00013535	9.49e-05	0.000101534	0.000137407		8.05364e-05	0.00013097	0.000110339	0.000213062	0.000121092	0.000127923	0.000233657	0.000131144	9.39e-05	3.71e-05	0.00014143	0.00013119	5.03e-05	0.000135964	0.000141163	5.28e-05		A351	0	0	0	7.56552e-05	0	0	9.625e-05	0	0	0	4.02303e-06	0	0	0	3.75603e-06	0
G351	2.01755e-05	1.47e-05	9.84e-05	2.71e-05	1.27e-05	3.46151e-05		3.02011e-05	1.00747e-05	3.68e-05	1.42041e-05	1.01e-05	1.28e-05	0	2.02e-05	4.7e-05	9.89e-05	0	4.04e-05	4.03e-05	2.72e-05	3.02e-05	1.32e-05		G351	0	0	2.18489e-06	0	0	0	0	0	1.23849e-05	6.42849e-05	0	5.78489e-06	5.68489e-06	0	0	0
C351	7.06143e-05	0.000102846	0	0.000149051	6.35e-05	7.72023e-05		0.000201341	0.000251866	0.000441355	0.000142041	0.000181638	0.000345392	0.000269605	6.05e-05	0.000156573	0.000173162	0.000222247	0.000151373	0.000201268	8.16e-05	0.000161329	0.000131883		C351	0.000124139	0.000174664	0.000364153	6.48392e-05	0.000104436	0.00026819	0.000192403	0	7.93707e-05	9.59597e-05	0.000145045	7.41707e-05	0.000124066	4.39773e-06	8.41267e-05	5.46807e-05
A352	6.07281e-05	5.9e-05	6.13e-05	0.000122724	0.000140233	8.8797e-05		4.02735e-05	9.08394e-05	3.69e-05	0.000128447	3.04e-05	0.00014137	7.21e-05	6.06e-05	0.000110195	9.95e-05	6.07e-05	8.11e-05	7.06e-05	0.000108989	9.09e-05	6.62e-05		A352	0	2.04233e-06	0	3.96496e-05	0	5.2573e-05	0	0	2.1398e-05	1.0703e-05	0	0	0	2.0192e-05	2.10297e-06	0
T352	0.000182184	0.000103316	1.23e-05	0.000190905	0.000127484	0.000123238		0.000161094	0.000252332	4.92e-05	0.000142719	0.000121652	0.000218481	0.000144253	0.000111178	0.000204647	9.95e-05	0.000131547	0.000212971	9.08e-05	0.00014986	0.000161601	9.27e-05		T352	3.78559e-05	0.000129094	0	1.94806e-05	0	9.52431e-05	2.10151e-05	0	8.14091e-05	0	8.30912e-06	8.97331e-05	0	2.66221e-05	3.83631e-05	0
G352	3.03641e-05	1.48e-05	0.000110385	8.18e-05	0.000114736	7.0417e-05		0	2.01865e-05	1.23e-05	1.42719e-05	6.08e-05	9e-05	0	0	6.3e-05	2.49e-05	1.01e-05	5.07e-05	5.04e-05	5.45e-05	1.01e-05	5.3e-05		G352	0	0	0	0	0	1.9583e-05	0	0	0	0	0	0	0	0	0	0
A353	0.000457847	0.000190278	0.00034572	0.00035073	0.000277697	0.000324454		0.000541479	0.000475158	0.000489135	0.00039673	0.000432809	0.000165984	0.000376263	0.000330353	0.000436395	0.00028308	0.00043392	0.000291891	0.000311454	0.000311008	0.000278388	0.000394602		A353	0.000217025	0.000150703	0.000164681	7.22754e-05	0.000108355	0	5.18086e-05	5.89863e-06	0.000111941	0	0.000109466	0	0	0	0	7.01476e-05
T353	6.24337e-05	4.39e-05	0.000572226	6.74e-05	0.000138849	0.000176962		8.17327e-05	8.26361e-05	2.45e-05	4.25068e-05	5.03e-05	2.55e-05	0	4.13e-05	0.000109099	0.000110771	6.2e-05	7.05e-05	4.02e-05	8.11e-05	9.28e-05	5.26e-05		T353	0	0	0	0	0	0	0	0	0	0	0	0	0	0	0	0
C353	5.20281e-05	8.78e-05	0.000119214	1.35e-05	0	5.45084e-05		6.12996e-05	1.03295e-05	3.67e-05	2.83378e-05	3.02e-05	1.28e-05	7.17e-05	1.03e-05	3.12e-05	4.92e-05	3.1e-05	9.06e-05	5.02e-05	5.41e-05	4.12e-05	1.32e-05		C353	6.79114e-06	0	0	0	0	0	1.71916e-05	0	0	0	0	3.60916e-05	0	0	0	0
A354	5.05341e-05	1.46e-05	0.000119569	0.000107887	2.52e-05	6.3558e-05		4.05293e-05	0.000101644	1.22e-05	8.4957e-05	7.05e-05	3.83e-05	0	7.07e-05	0	7.38e-05	4.06e-05	8.05e-05	5.02e-05	4.05e-05	0.000101244	1.32e-05		A354	0	3.80855e-05	0	2.13989e-05	6.94197e-06	0	0	7.14197e-06	0	1.0242e-05	0	1.6942e-05	0	0	3.7686e-05	0
T354	4.04273e-05	5.85e-05	0.000179353	0.000148344	8.83e-05	0.000102985		0.000121588	0.000132137	0.000109957	8.4957e-05	6.04e-05	3.83e-05	7.16e-05	0.000100973	0.000155887	3.69e-05	5.08e-05	5.03e-05	9.04e-05	9.45e-05	6.07e-05	5.26e-05		T354	1.86031e-05	2.91518e-05	6.97214e-06	0	0	0	0	0	5.29021e-05	0	0	0	0	0	0	0
G354	0	0	0	0	3.79e-05	7.58e-06		2.02647e-05	0	1.22e-05	0	0	8.93e-05	0	0	3.12e-05	2.46e-05	1.02e-05	3.02e-05	0	0	2.02e-05	2.63e-05		G354	1.26847e-05	0	4.62e-06	0	0	8.172e-05	0	0	2.362e-05	1.702e-05	2.62e-06	2.262e-05	0	0	1.262e-05	1.872e-05
A355	5.05868e-05	5.84e-05	0.000100849	6.74e-05	0.00010089	7.56252e-05		9.07304e-05	0.000111443	9.76e-05	0.000113173	3.02e-05	1.27e-05	1.79e-05	3.03e-05	6.22e-05	8.61e-05	7.1e-05	6.05e-05	3.02e-05	4.03e-05	7.07e-05	6.57e-05		A355	1.51052e-05	3.5818e-05	2.19748e-05	3.75482e-05	0	0	0	0	0	1.04748e-05	0	0	0	0	0	0
T355	0.000212465	0.000175244	0.000112055	9.43e-05	0.000113502	0.000141513		0.000181461	0.00017223	0.000195134	0.000226347	0.000211736	0.000178292	0.000214642	0.000121257	0.000217753	0.000122965	0.000101469	0.000171385	0.000150858	4.03e-05	0.000181849	0.000197114		T355	3.99476e-05	3.07173e-05	5.36209e-05	8.48336e-05	7.02229e-05	3.67789e-05	7.31289e-05	0	7.62399e-05	0	0	2.98719e-05	9.34488e-06	0	4.03359e-05	5.56009e-05
G355	2.02347e-05	5.84e-05	3.36e-05	2.69e-05	1.26e-05	3.03469e-05		1.00812e-05	5.0656e-05	1.22e-05	5.65867e-05	0	6.37e-05	5.37e-05	0	1.56e-05	2.46e-05	4.06e-05	1.01e-05	4.02e-05	8.07e-05	2.02e-05	0.000105128		G355	0	2.03091e-05	0	2.62397e-05	0	3.33531e-05	2.33531e-05	0	0	0	1.02531e-05	0	9.85306e-06	5.03531e-05	0	7.47811e-05
T356	0.000150491	5.76e-05	8.85e-05	0.000172519	2.48e-05	9.87819e-05		9.03225e-05	0.000110323	0.000120104	0.000181212	8.05e-05	0.000163206	7.03e-05	9.03e-05	0.000122442	0.000108909	4.02e-05	0.000171078	0.000110574	5.28e-05	0.000120502	0.000168259		T356	0	1.15413e-05	2.13221e-05	8.24305e-05	0	6.44241e-05	0	0	2.36601e-05	1.01271e-05	0	7.22961e-05	1.17921e-05	0	2.17201e-05	6.94771e-05
G356	9.02944e-05	5.76e-05	0.000110672	7.96e-05	8.69e-05	8.50133e-05		0.00024086	0.000310911	0.000492427	0.000362425	0.000231428	0.00026364	0.000263787	0.000230792	0.000122442	0.000266221	0.000231244	0.000110697	0.000170887	0.000224488	0.000281172	0.000232974		G356	0.000155847	0.000225898	0.000407414	0.000277412	0.000146415	0.000178627	0.000178774	0.000145779	3.74287e-05	0.000181208	0.000146231	2.56837e-05	8.58737e-05	0.000139475	0.000196159	0.000147961
C356	0.000150491	5.76e-05	1.11e-05	0.000106166	8.69e-05	8.24513e-05		9.03225e-05	5.01469e-05	0.000192167	2.78788e-05	7.04e-05	7.53e-05	0.000105515	0.000130447	0.000183663	4.84e-05	0.000110595	0.000100634	0.000120626	6.6e-05	0.000100419	6.47e-05		C356	7.87113e-06	0	0.000109716	0	0	0	2.30637e-05	4.79957e-05	0.000101212	0	2.81437e-05	1.81827e-05	3.81747e-05	0	1.79677e-05	0
A357	6.10221e-05	9.96e-05	8.83e-05	1.31e-05	3.68e-05	5.97644e-05		0.000100916	4.0554e-05	7.12e-05	8.27449e-05	8.05e-05	4.97e-05	3.48e-05	5.07e-05	3.03e-05	4.79e-05	7.1e-05	9.06e-05	9.04e-05	0	4.05e-05	5.13e-05		A357	4.11519e-05	0	1.14356e-05	2.29805e-05	2.07356e-05	0	0	0	0	0	1.12356e-05	3.08356e-05	3.06356e-05	0	0	0
G357	3.05111e-05	0.000142243	7.73e-05	0.000235951	0.000208615	0.000138924		0	2.0277e-05	0.000178008	0.000137908	0.000261735	0.000161539	0.000104422	2.03e-05	0.000196761	0.000215641	2.03e-05	0.00010063	6.03e-05	0.000130603	0	0.000153759		G357	0	0	3.9084e-05	0	0.000122811	2.2615e-05	0	0	5.7837e-05	7.6717e-05	0	0	0	0	0	1.4835e-05
C357	8.13628e-05	0.000170692	1.1e-05	0.000131084	0.0002577	0.000130368		0.000171558	0.000354847	0.000356015	0.000275816	0.00040267	0.000273373	0.000174037	0.000294264	0.000227032	0.000119801	0.000283964	0.000130819	0.000110485	0.000156723	0.000293724	0.000243452		C357	4.119e-05	0.000224479	0.000225647	0.000145449	0.000272302	0.000143005	4.36692e-05	0.000163896	9.66642e-05	0	0.000153596	4.51235e-07	0	2.63552e-05	0.000163356	0.000113084
A358	4.00717e-05	2.81e-05	4.4e-05	0	2.43e-05	2.72943e-05		7.01579e-05	3.00583e-05	3.52e-05	8.1784e-05	6.03e-05	0	8.59e-05	5.01e-05	5.99e-05	0	8.03e-05	4.02e-05	8.03e-05	7.75e-05	5.01e-05	0		A358	4.28635e-05	2.76397e-06	7.90565e-06	5.44896e-05	3.30057e-05	0	5.86057e-05	2.28057e-05	3.26057e-05	0	5.30057e-05	1.29057e-05	5.30057e-05	5.02057e-05	2.28057e-05	0
G358	2.00359e-05	4.21e-05	0.000154048	1.3e-05	7.28e-05	6.03968e-05		2.00451e-05	1.00194e-05	4.69e-05	5.45227e-05	5.02e-05	6.15e-05	3.44e-05	1e-05	1.5e-05	2.37e-05	2.01e-05	3.01e-05	2.01e-05	1.29e-05	3.01e-05	3.79e-05		G358	0	0	0	0	0	1.10323e-06	0	0	0	0	0	0	0	0	0	0
C358	0.000100179	0.000168542	0.000209065	9.08e-05	0.000121299	0.000137977		0.000180406	0.0003607	0.000234667	0.00020446	0.000321388	0.000294985	0.000206157	0.000170339	0.000149858	0.000106622	0.000300948	0.000150686	0.000150559	0.000180895	0.000200449	0.000379262		C358	4.24288e-05	0.000222723	9.66899e-05	6.64829e-05	0.000183411	0.000157008	6.81799e-05	3.23619e-05	1.18809e-05	0	0.000162971	1.27089e-05	1.25819e-05	4.29179e-05	6.24719e-05	0.000241285
A359	0.000110321	8.42e-05	7.69e-05	0.000103532	6.05e-05	8.70906e-05		0.000130251	7.01347e-05	8.2e-05	0.000122512	8.03e-05	8.59e-05	0.000102911	0.000170447	0.000119648	2.37e-05	0.000240799	0.000120382	0.000130339	0.000167671	0.00018056	0.000125731		A359	4.31608e-05	0	0	3.54217e-05	0	0	1.58204e-05	8.33564e-05	3.25574e-05	0	0.000153708	3.32914e-05	4.32484e-05	8.05804e-05	9.34694e-05	3.86404e-05
G359	0	0	0.000109884	1.29e-05	2.42e-05	2.93968e-05		1.00193e-05	1.00192e-05	0	0	2.01e-05	1.23e-05	0	1e-05	2.99e-05	0	1e-05	4.01e-05	3.01e-05	0	1e-05	0		G359	0	0	0	0	0	0	0	0	5.032e-07	0	0	1.07032e-05	7.032e-07	0	0	0
C359	0.00025073	0.000224464	3.3e-05	0.000168239	0.000169409	0.000169168		0.000310599	0.000561077	0.000304567	0.00027225	0.000270869	0.000196288	0.000171518	0.000110289	0.000164516	9.46e-05	0.0001806	0.000100318	0.000190495	0.000257955	0.000220684	7.54e-05		C359	0.000141431	0.000391909	0.000135399	0.000103081	0.000101701	2.71197e-05	2.34968e-06	0	0	0	1.14317e-05	0	2.13267e-05	8.87867e-05	5.15157e-05	0
T360	0.000120255	0.000126045	7.54e-05	0.000129388	0.00014501	0.00011922		0.000160317	0.000100231	7.01e-05	0.000149404	0.000160652	7.35e-05	0.000102669	0.000100242	7.47e-05	2.36e-05	7.02e-05	9.03e-05	7.02e-05	6.43e-05	0.000130332	0.000112884		T360	4.10978e-05	0	0	3.01842e-05	4.14324e-05	0	0	0	0	0	0	0	0	0	1.11124e-05	0
G360	0.000230489	0.000182065	9.69e-05	0.000207021	0.000120842	0.000167463		0.000410813	0.000390899	0.000175363	0.000298807	0.00026106	0.000318592	0.000239562	0.000270652	0.000209161	0.000177257	0.000220777	0.00022083	0.000150503	0.000205915	0.00036092	0.000288481		G360	0.00024335	0.000223436	7.89967e-06	0.000131344	9.35967e-05	0.000151129	7.20987e-05	0.000103189	4.16977e-05	9.79367e-06	5.33137e-05	5.33667e-05	0	3.84517e-05	0.000193457	0.000121018
C360	3.00637e-05	0	9.69e-05	1.29e-05	1.21e-05	3.03927e-05		5.00992e-05	2.00461e-05	0	1.35822e-05	2.01e-05	1.23e-05	0	2e-05	1.49e-05	0	3.01e-05	4.02e-05	6.02e-05	1.29e-05	5.01e-05	0		C360	1.97064e-05	0	0	0	0	0	0	0	0	0	0	9.80725e-06	2.98073e-05	0	1.97073e-05	0
T361	4.01913e-05	8.41e-05	0.000106631	0.00016856	0.000145234	0.000108943		0	2.00967e-05	7.03e-05	2.72053e-05	6.04e-05	6.14e-05	0.000188463	4.02e-05	7.48e-05	8.29e-05	7.04e-05	5.03e-05	4.02e-05	7.74e-05	2.01e-05	5.03e-05		T361	0	0	0	0	0	0	7.95197e-05	0	0	0	0	0	0	0	0	0
G361	8.03826e-05	0.000238406	0.000127958	6.48e-05	0.000242057	0.000150721		0.00031112	0.000452175	0.000644315	0.000285656	0.000362188	0.000196348	0.000256995	0.000160835	0.000254449	0.00018956	0.000211265	0.000211164	0.000200777	0.000373885	0.000200934	0.000414568		G361	0.000160399	0.000301454	0.000493594	0.000134935	0.000211467	4.56273e-05	0.000106274	1.01143e-05	0.000103728	3.88393e-05	6.05443e-05	6.04433e-05	5.00563e-05	0.000223164	5.02133e-05	0.000263847
C361	3.01435e-05	2.8e-05	4.27e-05	3.89e-05	2.42e-05	3.27887e-05		1.00361e-05	4.01933e-05	2.34e-05	6.80133e-05	7.04e-05	4.91e-05	5.14e-05	1.01e-05	2.99e-05	7.11e-05	1.01e-05	5.03e-05	3.01e-05	6.45e-05	3.01e-05	3.77e-05		C361	0	7.40463e-06	0	3.52246e-05	3.76113e-05	1.63113e-05	1.86113e-05	0	0	3.83113e-05	0	1.75113e-05	0	3.17113e-05	0	4.9113e-06
A362	5.00987e-05	0	0.000139082	1.29e-05	3.62e-05	4.76561e-05		3.00613e-05	5.00972e-05	1.17e-05	0	2.01e-05	1.22e-05	3.42e-05	2e-05	0	5.91e-05	0	5.02e-05	0	1.29e-05	2.01e-05	0		A362	0	2.44105e-06	0	0	0	0	0	0	0	1.14439e-05	0	2.54386e-06	0	0	0	0
T362	4.0079e-05	0	8.56e-05	2.58e-05	1.21e-05	3.27158e-05		3.00613e-05	9.01749e-05	1.17e-05	0.000108542	4.02e-05	8.57e-05	0.000273504	7.02e-05	5.97e-05	0.000130051	6.02e-05	0.000140688	6.02e-05	0.000102842	0.000140396	7.52e-05		T362	0	5.74591e-05	0	7.58265e-05	7.48421e-06	5.29842e-05	0.000240788	3.74842e-05	2.69842e-05	9.73352e-05	2.74842e-05	0.000107972	2.74842e-05	7.01262e-05	0.00010768	4.24842e-05
G362	0	2.8e-05	0	0	0	5.6e-06		1.00204e-05	2.00389e-05	0	0	0	0	0	2e-05	0	2.36e-05	0	0	0	1.29e-05	0	0		G362	4.42044e-06	1.44389e-05	0	0	0	0	0	1.44e-05	0	1.8e-05	0	0	0	7.3e-06	0	0
A363	0.000141682	0.000111418	0.00014983	5.18e-05	1.21e-05	9.3366e-05		6.03652e-05	7.05524e-05	3.49e-05	6.76251e-05	6.07e-05	2.44e-05	6.81e-05	5.06e-05	0.000104348	8.28e-05	9.11e-05	6.07e-05	0.000141112	0.000102462	6.06e-05	0.000137577		A363	0	0	0	0	0	0	0	0	1.0982e-05	0	0	0	4.7746e-05	9.09605e-06	0	4.4211e-05
G363	2.02403e-05	0.000139272	7.49e-05	0.000232898	0.000132703	0.000120003		2.01217e-05	2.01578e-05	0.000162804	9.46752e-05	0.000131434	8.53e-05	6.81e-05	4.05e-05	0.000178883	0.000201029	1.01e-05	9.1e-05	8.06e-05	0.000153692	0	0.000112563		G363	0	0	4.28013e-05	0	1.14313e-05	0	0	0	5.88803e-05	8.10263e-05	0	0	0	3.36893e-05	0	0
C363	0.000141682	0.000111418	0.00014983	0.000142327	0.000168894	0.00014283		0.000291765	0.000231815	0.000441896	0.000324601	0.000384192	0.000256038	0.000289342	0.000202484	0.000223604	7.1e-05	0.000182295	0.000242772	0.000241906	0.0001665	0.000212252	0.000225127		C363	0.000148935	8.8985e-05	0.000299066	0.000181771	0.000241362	0.000113208	0.000146512	5.96538e-05	8.07738e-05	0	3.94648e-05	9.99418e-05	9.90758e-05	2.36698e-05	6.94218e-05	8.22968e-05
A364	3.00625e-05	4.15e-05	6.44e-05	3.85e-05	4.79e-05	4.44725e-05		6.0163e-05	0.000150332	1.16e-05	0	2.01e-05	1.21e-05	3.38e-05	1e-05	4.44e-05	5.87e-05	3.02e-05	3.02e-05	1e-05	1.27e-05	2.01e-05	4.97e-05		A364	1.56905e-05	0.00010586	0	0	0	0	0	0	0	1.42275e-05	0	0	0	0	0	5.22749e-06
T364	4.00834e-05	9.68e-05	0.00018246	5.13e-05	7.18e-05	8.84887e-05		2.00543e-05	0.000100221	0.000104081	6.71908e-05	7.04e-05	0.000109098	0.000135348	8.03e-05	0	7.04e-05	6.03e-05	6.03e-05	4.02e-05	7.63e-05	4.01e-05	9.94e-05		T364	0	1.17328e-05	1.55923e-05	0	0	2.06093e-05	4.68593e-05	0	0	0	0	0	0	0	0	1.09113e-05
G364	3.00625e-05	1.38e-05	0	0	1.2e-05	1.11725e-05		0	4.00886e-05	0	1.34382e-05	0	0	0	0	2.96e-05	0	1.01e-05	1.01e-05	0	3.82e-05	3.01e-05	0		G364	0	2.89161e-05	0	2.26564e-06	0	0	0	0	1.84275e-05	0	0	0	0	2.70275e-05	1.89275e-05	0
A365	0.000111297	4.15e-05	0.000107016	5.13e-05	8.38e-05	7.89825e-05		9.05597e-05	7.05852e-05	5.78e-05	5.36797e-05	0.00011076	6.06e-05	1.69e-05	0.000121439	0.000148111	8.22e-05	9.11e-05	5.04e-05	9.05e-05	5.08e-05	3.03e-05	8.7e-05		A365	1.15771e-05	0	0	0	3.17775e-05	0	0	4.24565e-05	6.91285e-05	3.21748e-06	1.21175e-05	0	1.15175e-05	0	0	8.01748e-06
G365	1.01179e-05	8.29e-05	0.000160524	0.000128325	0.000119755	0.000100324		7.04353e-05	2.01672e-05	3.47e-05	4.02598e-05	5.03e-05	3.63e-05	1.69e-05	2.02e-05	8.89e-05	7.04e-05	8.1e-05	7.05e-05	0	3.81e-05	3.03e-05	9.94e-05		G365	0	0	0	0	0	0	0	0	0	0	0	0	0	0	0	0
C365	0.000323772	0.000193539	9.63e-05	0.000320813	0.000275436	0.000241972		0.000523234	0.000625183	0.000393068	0.000496538	0.000624283	0.000424016	0.000540614	0.000597075	0.00041471	0.000410774	0.000394633	0.000393018	0.000382002	0.000444597	0.000394134	0.00038516		C365	0.000281262	0.000383211	0.000151096	0.000254566	0.000382311	0.000182044	0.000298642	0.000355103	0.000172738	0.000168802	0.000152661	0.000151046	0.00014003	0.000202625	0.000152162	0.000143188
A366	0.000120679	8.29e-05	3.21e-05	2.57e-05	3.59e-05	5.94559e-05		8.04279e-05	8.04149e-05	0.000277354	6.70439e-05	0.000110847	0.000108976	0.00015195	4.03e-05	4.44e-05	5.87e-05	0.000100978	0.000141296	9.07e-05	7.61e-05	0.000191397	7.45e-05		A366	2.0972e-05	2.09591e-05	0.000217898	7.58802e-06	5.13911e-05	4.95201e-05	9.24941e-05	0	0	0	4.15221e-05	8.18401e-05	3.12441e-05	1.66441e-05	0.000131941	1.50441e-05
T366	8.0453e-05	8.29e-05	5.35e-05	0.000141237	7.18e-05	8.5978e-05		4.02139e-05	8.04149e-05	6.93e-05	4.02263e-05	4.03e-05	4.84e-05	6.75e-05	4.03e-05	1.48e-05	0.000105692	5.05e-05	7.06e-05	0.000100752	6.34e-05	0.000120882	7.45e-05		T366	0	0	0	0	0	0	0	0	0	1.9714e-05	0	0	1.4774e-05	0	3.4904e-05	0
C366	0	2.76e-05	3.21e-05	0	2.39e-05	1.672e-05		4.02139e-05	1.00519e-05	0	0	0	1.21e-05	0	2.02e-05	0	1.17e-05	0	5.05e-05	0	2.54e-05	3.02e-05	3.72e-05		C366	2.34939e-05	0	0	0	0	0	0	3.48e-06	0	0	0	3.378e-05	0	8.68e-06	1.348e-05	2.048e-05
T367	9.08229e-05	8.28e-05	0.000190927	1.28e-05	7.18e-05	8.983e-05		0.000100557	7.04977e-05	6.92e-05	8.04128e-05	9.05e-05	8.47e-05	5.06e-05	0.000131397	1.48e-05	8.21e-05	7.09e-05	0.000130901	6.03e-05	0.00016483	0.000131163	6.2e-05		T367	1.07271e-05	0	0	0	6.70029e-07	0	0	4.1567e-05	0	0	0	4.1071e-05	0	7.5e-05	4.1333e-05	0
G367	0.00028256	0.000497052	4.24e-05	8.97e-05	0.000155515	0.000213445		0.000301671	0.000443128	0.000196164	0.000549487	0.000422361	0.000278339	0.000252917	0.000586232	0.000295744	0.000305043	0.000303665	0.000302078	0.000412164	0.00034234	0.000413669	0.000347196		G367	8.82259e-05	0.000229683	0	0.000336042	0.000208916	6.48936e-05	3.94716e-05	0.000372787	8.22986e-05	9.15976e-05	9.02196e-05	8.86326e-05	0.000198719	0.000128895	0.000200224	0.000133751
C367	2.01829e-05	1.38e-05	7.42e-05	1.28e-05	2.39e-05	2.89766e-05		4.02228e-05	4.02844e-05	0	2.68043e-05	0	1.21e-05	0	4.04e-05	2.96e-05	0	4.05e-05	5.03e-05	2.01e-05	0	8.07e-05	3.72e-05		C367	1.12463e-05	1.13078e-05	0	0	0	0	0	1.14234e-05	6.23429e-07	0	1.15234e-05	2.13234e-05	0	0	5.17234e-05	8.22343e-06
A368	0.000100407	9.51e-05	0.000127808	8.85e-05	8.26e-05	9.88829e-05		0.000150704	0.000140564	0.000193516	0.000118991	0.000100605	0.000119437	8.31e-05	8.04e-05	0.000160758	0.0001737	0.000110726	0.000130932	7.04e-05	6.25e-05	0.000120622	0.000122291		A368	5.18209e-05	4.16807e-05	9.46331e-05	2.0108e-05	1.72207e-06	2.05541e-05	0	0	6.18751e-05	7.48171e-05	1.18431e-05	3.20491e-05	0	0	2.17391e-05	2.34081e-05
T368	3.0122e-05	4.08e-05	0.00017041	2.53e-05	4.72e-05	6.27664e-05		0.000100469	8.03221e-05	0.000113833	3.96637e-05	0.000110665	7.17e-05	0	2.01e-05	0.000160758	1.16e-05	6.04e-05	8.06e-05	2.01e-05	5e-05	9.05e-05	2.45e-05		T368	3.77028e-05	1.75557e-05	5.10666e-05	0	4.78986e-05	8.9336e-06	0	0	9.79916e-05	0	0	1.78336e-05	0	0	2.77336e-05	0
C368	2.00813e-05	0	5.33e-05	0	2.36e-05	1.93963e-05		1.00469e-05	1.00403e-05	0	0	1.01e-05	1.19e-05	0	3.01e-05	1.46e-05	0	2.01e-05	0	2.01e-05	0	0	0		C368	0	0	0	0	0	0	0	1.07037e-05	0	0	7.03734e-07	0	7.03734e-07	0	0	0
A369	6.01872e-05	1.35e-05	0.000306085	3.77e-05	4.69e-05	9.28744e-05		0.000190819	0.000270943	0.000101756	0.000157725	9.06e-05	0.000213807	8.25e-05	8.03e-05	5.82e-05	0.000184495	0.000100577	0.000120795	0.00013089	4.97e-05	6.03e-05	9.73e-05		A369	9.79442e-05	0.000178068	8.88156e-06	6.48501e-05	0	0.000120933	0	0	0	9.16206e-05	7.70256e-06	2.79206e-05	3.80156e-05	0	0	4.42556e-06
T369	2.00624e-05	0.000134975	2.11e-05	0.000113155	8.21e-05	7.42785e-05		8.03447e-05	6.02095e-05	0	2.62874e-05	0.000120767	1.19e-05	8.25e-05	2.01e-05	0.000101876	0.00011531	0.000130751	6.04e-05	6.04e-05	7.46e-05	8.03e-05	2.43e-05		T369	6.0662e-06	0	0	0	4.64885e-05	0	8.22152e-06	0	2.75975e-05	4.10315e-05	5.64725e-05	0	0	3.21521e-07	6.02152e-06	0
C369	3.00936e-05	0	3.17e-05	1.26e-05	2.35e-05	1.95787e-05		1.00431e-05	2.00698e-05	2.26e-05	1.31437e-05	0	0	0	4.01e-05	0	0	0	3.02e-05	0	1.24e-05	1e-05	2.43e-05		C369	0	4.91125e-07	3.02128e-06	0	0	0	0	2.05213e-05	0	0	0	1.06213e-05	0	0	0	4.72128e-06
A370	5.01686e-05	2.67e-05	3.17e-05	4.98e-05	0	3.16737e-05		5.01897e-05	3.01039e-05	3.35e-05	3.89408e-05	3.02e-05	5.88e-05	0	2.01e-05	5.76e-05	2.28e-05	6.03e-05	5.03e-05	5.03e-05	6.16e-05	3.01e-05	2.41e-05		A370	1.8516e-05	0	1.82629e-06	7.2671e-06	0	2.71263e-05	0	0	2.59263e-05	0	2.86263e-05	1.86263e-05	1.86263e-05	2.99263e-05	0	0
T370	0.000210708	0.000106628	9.5e-05	0.000186704	4.64e-05	0.000129088		5.01897e-05	0.000180623	0.000156404	0.000142783	0.000100728	0.00024678	4.88e-05	0.000130505	0.000201485	5.7e-05	0.000140787	0.000100685	0.000120638	9.85e-05	0.000120488	0.000144462		T370	0	5.15352e-05	2.7316e-05	1.3695e-05	0	0.000117692	0	1.417e-06	7.2397e-05	0	1.1699e-05	0	0	0	0	1.5374e-05
G370	0	2.67e-05	0	2.49e-05	0	1.032e-05		2.00759e-05	1.00346e-05	1.12e-05	0	5.04e-05	0	1.63e-05	2.01e-05	0	3.42e-05	2.01e-05	7.05e-05	2.01e-05	2.46e-05	2.01e-05	0		G370	9.75589e-06	0	8.8e-07	0	4.008e-05	0	5.98e-06	9.78e-06	0	2.388e-05	9.78e-06	6.018e-05	9.78e-06	1.428e-05	9.78e-06	0
A371	5.06073e-05	0.000103815	0.000126581	7.25e-05	0.00010153	9.10067e-05		5.02887e-05	2.01743e-05	6.53e-05	8.849e-05	3.02e-05	0.000171542	7.93e-05	3.05e-05	8.41e-05	7.77e-05	6.08e-05	3.02e-05	3.01e-05	0.00013194	4.05e-05	8.21e-05		A371	0	0	0	0	0	8.05353e-05	0	0	0	0	0	0	0	4.09333e-05	0	0
G371	3.03644e-05	0.000506099	0.000221517	0.000374396	0.000406119	0.000307699		3.01732e-05	1.00872e-05	0.000413295	0.000417167	1.01e-05	0.000468882	0.000507542	1.02e-05	0.000476351	0.000355307	2.03e-05	3.02e-05	6.03e-05	0.00057574	2.02e-05	0.000468911		G371	0	0	0.000105596	0.000109468	0	0.000161183	0.000199843	0	0.000168652	4.76079e-05	0	0	0	0.000268041	0	0.000161212
C371	0.000384615	0.000350376	1.05e-05	0.000229469	0.000180497	0.000231091		0.000553175	0.000706101	0.000696076	0.000480374	0.000593567	0.000480318	0.00045996	0.000325256	0.00044833	0.000355307	0.000526673	0.000282025	0.000391731	0.000275875	0.000404711	0.000410297		C371	0.000322084	0.000475009	0.000464985	0.000249283	0.000362476	0.000249227	0.000228869	9.41645e-05	0.000217239	0.000124216	0.000295582	5.09335e-05	0.00016064	4.47835e-05	0.00017362	0.000179206
A372	0.000151379	0.000129747	0.000165956	7.27e-05	4.52e-05	0.000112996		7.04764e-05	0.000111036	6.52e-05	0.000126379	0.000110816	3.43e-05	0.000158602	6.06e-05	4.21e-05	0.000133415	8.09e-05	0.000100834	0.000100631	0.000107953	0.00015141	0.000117338		A372	0	0	0	1.33827e-05	0	0	4.56056e-05	0	0	2.04186e-05	0	0	0	0	3.84136e-05	4.34159e-06
T372	9.08274e-05	6.49e-05	0.000186701	0.000217994	0.00011312	0.000134708		0.000120817	8.07534e-05	6.52e-05	6.31896e-05	0.000100741	8e-05	6.34e-05	6.06e-05	0.000168464	0.000200122	8.09e-05	8.07e-05	3.02e-05	8.4e-05	6.06e-05	0.000187741		T372	0	0	0	0	0	0	0	0	3.37555e-05	6.54135e-05	0	0	0	0	0	5.30325e-05
C372	2.01839e-05	0	8.3e-05	2.42e-05	2.26e-05	2.99968e-05		2.01361e-05	2.01884e-05	2.17e-05	1.26379e-05	0	2.29e-05	0	3.03e-05	0	1.11e-05	1.01e-05	0	0	0	1.01e-05	1.17e-05		C372	0	0	0	0	0	0	0	3.03225e-07	0	0	0	0	0	0	0	0
T373	7.05275e-05	0.000181378	5.12e-05	0.000133182	0.000112984	0.000109854		8.04594e-05	0.000100666	0.00018454	0.000138891	7.07e-05	0.000125582	0.000221737	8.07e-05	0.000140319	8.9e-05	0.000121169	8.09e-05	0.000100825	8.39e-05	0.000151162	7.03e-05		T373	0	0	7.46857e-05	2.90363e-05	0	1.57277e-05	0.000111883	0	3.04647e-05	0	1.13147e-05	0	0	0	4.13077e-05	0
G373	0.000100754	0.000297978	0.000143388	0.000157396	0.00021467	0.000182837		0.000291665	0.000362399	0.000542764	0.000555563	0.000484584	0.000410996	0.000332605	0.000272364	0.00043499	0.000289152	0.000242339	0.000353818	0.000362969	0.000455521	0.000272092	0.000351354		G373	0.000108828	0.000179562	0.000359927	0.000372725	0.000301747	0.000228159	0.000149768	8.95269e-05	0.000252153	0.000106315	5.95019e-05	0.000170981	0.000180132	0.000272684	8.92549e-05	0.000168517
C373	2.01507e-05	3.89e-05	0.000133146	1.21e-05	5.65e-05	5.21593e-05		2.01149e-05	1.00666e-05	0.000151974	1.26264e-05	3.03e-05	4.57e-05	4.75e-05	6.05e-05	5.61e-05	3.34e-05	2.02e-05	0	4.03e-05	4.79e-05	3.02e-05	8.2e-05		C373	0	0	9.98147e-05	0	0	0	0	8.34065e-06	3.94065e-06	0	0	0	0	0	0	2.98407e-05
A374	0.000180495	6.38e-05	8.1e-05	7.14e-05	1.11e-05	8.15589e-05		0.000100314	0.0001705	7.48e-05	4.97179e-05	0.000120597	0.000112397	6.24e-05	0.000310992	0.000124184	8.74e-05	0.000341726	6.03e-05	4.02e-05	7.09e-05	0.000210778	8.08e-05		A374	1.87551e-05	8.89407e-05	0	0	3.90381e-05	3.08381e-05	0	0.000229433	4.26251e-05	5.84109e-06	0.000260167	0	0	0	0.000129219	0
T374	2.0055e-05	7.65e-05	5.06e-05	0.00017841	7.78e-05	8.0673e-05		8.02512e-05	3.00882e-05	7.48e-05	4.97179e-05	6.03e-05	0.000101158	7.8e-05	7.02e-05	0.000124184	6.56e-05	4.02e-05	6.03e-05	2.01e-05	0.000177171	4.01e-05	4.62e-05		T374	0	0	0	0	0	2.0485e-05	0	0	4.3511e-05	0	0	0	0	9.6498e-05	0	0
C374	3.00824e-05	1.28e-05	0.00016207	0	0	4.09905e-05		0	3.00882e-05	0	1.24295e-05	4.02e-05	0	3.12e-05	0	0	2.19e-05	0	2.01e-05	0	0	1e-05	0		C374	0	0	0	0	0	0	0	0	0	0	0	0	0	0	0	0
A375	0.000190964	0.000114334	0.000111254	0.000213478	0.000232586	0.000172523		0.000110548	0.000100448	5.33e-05	4.9578e-05	0.000150654	6.72e-05	6.22e-05	0.00015096	0.000164971	5.44e-05	8.06e-05	0.00013066	0.00012049	9.42e-05	6.04e-05	0.000161209		A375	0	0	0	0	0	0	0	0	0	0	0	0	0	0	0	0
G375	5.02538e-05	5.08e-05	1.01e-05	8.3e-05	0.000132907	6.54122e-05		5.02492e-05	5.0224e-05	6.39e-05	6.19725e-05	1e-05	0.000100831	9.33e-05	7.04e-05	0.000123728	5.44e-05	6.04e-05	5.03e-05	3.01e-05	7.07e-05	7.05e-05	3.45e-05		G375	0	0	0	0	0	3.54188e-05	2.78878e-05	4.98784e-06	5.83158e-05	0	0	0	0	5.28784e-06	5.08784e-06	0
C375	0.00013066	0.000190556	0.00015171	7.12e-05	6.65e-05	0.000122125		0.000241196	0.000321434	0.000490055	0.000210706	0.000381656	0.000190459	0.000217706	0.000231472	0.000109981	0.000141424	0.000171173	0.00026132	0.000341389	0.000235599	0.000342193	0.000172724		C375	0.000119071	0.000199308	0.00036793	8.85812e-05	0.000259531	6.83338e-05	9.55808e-05	0.000109347	0	1.92988e-05	4.90478e-05	0.000139195	0.000219264	0.000113474	0.000220068	5.05988e-05
A376	0.000140399	2.53e-05	5.05e-05	0.00010634	4.41e-05	7.33277e-05		0.000180563	0.000240647	7.43e-05	8.6518e-05	9.03e-05	8.94e-05	0.000217098	0.000240945	0.000150708	0.000141039	0.000190993	0.000100387	6.02e-05	9.4e-05	0.00017066	0.000195133		A376	0.000107236	0.00016732	9.72254e-07	1.31903e-05	1.69723e-05	1.60723e-05	0.00014377	0.000167617	7.73803e-05	6.77113e-05	0.000117665	2.70593e-05	0	2.06723e-05	9.73323e-05	0.000121805
T376	2.0057e-05	7.6e-05	0.000151417	0.000153603	2.21e-05	8.46354e-05		3.00939e-05	4.01079e-05	1.06e-05	2.47194e-05	7.02e-05	3.35e-05	7.75e-05	4.02e-05	8.22e-05	4.34e-05	3.02e-05	1e-05	6.02e-05	4.7e-05	6.02e-05	2.3e-05		T376	0	0	0	0	0	0	0	0	0	0	0	0	0	0	0	0
C376	1.00285e-05	0	3.03e-05	0	0	8.0657e-06		0	2.00539e-05	0	0	1e-05	0	0	0	0	2.17e-05	2.01e-05	3.01e-05	1e-05	4.7e-05	2.01e-05	0		C376	0	1.19882e-05	0	0	1.9343e-06	0	0	0	0	1.36343e-05	1.20343e-05	2.20343e-05	1.9343e-06	3.89343e-05	1.20343e-05	0
A377	0.000141149	8.86e-05	5.05e-05	0.000129737	0.000132367	0.000108471		9.05123e-05	7.0441e-05	2.12e-05	9.88423e-05	5.01e-05	7.81e-05	7.74e-05	5.04e-05	6.85e-05	0.000108367	0.00015137	0.000140441	0.000120274	2.35e-05	7.06e-05	0.000103209		A377	0	0	0	0	0	0	0	0	0	0	4.28994e-05	3.19704e-05	1.18034e-05	0	0	0
G377	0	5.06e-05	0.000181962	0.000106148	4.41e-05	7.6562e-05		2.01138e-05	0	4.24e-05	3.70659e-05	5.01e-05	8.93e-05	7.74e-05	1.01e-05	6.85e-05	6.5e-05	4.04e-05	6.02e-05	3.01e-05	7.04e-05	2.02e-05	2.29e-05		G377	0	0	0	0	0	1.2738e-05	8.38e-07	0	0	0	0	0	0	0	0	0
C377	0.000131067	0.00018984	8.09e-05	0.000129737	0.000165459	0.000139401		0.000241366	0.000231449	0.0004455	0.000345948	0.00023059	0.000223197	0.000325198	0.000352894	0.000164285	0.000238407	0.000201827	0.00020063	0.000170388	0.000375375	0.000231862	0.000172014		C377	0.000101966	9.20483e-05	0.000306099	0.000206548	9.11894e-05	8.37964e-05	0.000185797	0.000213493	2.48844e-05	9.90064e-05	6.24264e-05	6.12294e-05	3.09874e-05	0.000235974	9.24614e-05	3.26134e-05
T378	4.01683e-05	8.86e-05	3.03e-05	0.000141779	8.82e-05	7.78095e-05		6.02422e-05	0.000130495	0.000106088	9.88301e-05	6.02e-05	5.58e-05	1.55e-05	6.03e-05	9.58e-05	9.75e-05	8.05e-05	8.03e-05	5.02e-05	9.38e-05	9.05e-05	5.73e-05		T378	0	5.26851e-05	2.82785e-05	2.10206e-05	0	0	0	0	1.79905e-05	1.96905e-05	2.69054e-06	2.49054e-06	0	1.59905e-05	1.26905e-05	0
G378	0.000120505	0.000101215	8.07e-05	0.000118149	0.000121288	0.000108371		0.000210848	0.000271027	8.49e-05	0.000321198	0.000220833	0.000256866	0.000263243	0.000251246	0.000191623	4.33e-05	0.00019128	0.000150583	0.000180594	0.000152452	0.000180948	0.000160517		G378	0.000102476	0.000162656	0	0.000212826	0.000112462	0.000148495	0.000154872	0.000142875	8.32516e-05	0	8.29086e-05	4.22116e-05	7.22226e-05	4.40806e-05	7.25766e-05	5.21456e-05
C378	1.00421e-05	2.53e-05	2.02e-05	5.91e-05	0	2.29284e-05		4.01614e-05	0	0	0	5.02e-05	0	0	2.01e-05	0	6.5e-05	1.01e-05	0	2.01e-05	0	6.03e-05	1.15e-05		C378	1.7233e-05	0	0	0	2.72716e-05	0	0	0	0	4.20716e-05	0	0	0	0	3.73716e-05	0
A379	0.000110318	0.000100036	7.1e-05	1.17e-05	0.000141702	8.69511e-05		8.02375e-05	9.02799e-05	5.24e-05	0.000134491	6.02e-05	8.83e-05	6.12e-05	4.01e-05	6.76e-05	5.36e-05	3.01e-05	1e-05	5.02e-05	3.48e-05	7.02e-05	0.000181525		A379	0	3.32872e-06	0	4.75396e-05	0	1.34886e-06	0	0	0	0	0	0	0	0	0	9.45739e-05
G379	2.00578e-05	0.000112541	0.000212854	5.83e-05	8.72e-05	9.81906e-05		1.00297e-05	1.00311e-05	4.19e-05	7.33586e-05	5.02e-05	0.000110397	6.12e-05	0	8.12e-05	0.000150181	4.02e-05	5.02e-05	3.01e-05	0.000127744	0	3.4e-05		G379	0	0	0	0	0	1.22064e-05	0	0	0	5.19904e-05	0	0	0	2.95534e-05	0	0
C379	0.000160462	6.25e-05	0.000101359	5.83e-05	7.63e-05	9.17842e-05		0.000270802	0.000220684	0.000230673	0.000281208	0.000361279	0.000176636	0.000107104	0.000220677	0.000270533	0.000139454	0.000160751	0.000140575	0.000170583	0.000127744	0.000160551	0.000124799		C379	0.000179017	0.0001289	0.000138889	0.000189424	0.000269495	8.48518e-05	1.53198e-05	0.000128893	0.000178749	4.76698e-05	6.89668e-05	4.87908e-05	7.87988e-05	3.59598e-05	6.87668e-05	3.30148e-05
A380	4.00661e-05	1.25e-05	5.03e-05	3.48e-05	5.43e-05	3.83932e-05		4.00689e-05	1.00151e-05	5.23e-05	6.09117e-05	9.02e-05	6.6e-05	7.62e-05	9.02e-05	8.08e-05	5.34e-05	4.01e-05	9.02e-05	0.000100219	8.1e-05	3.01e-05	0.000113068		A380	1.6757e-06	0	1.39068e-05	2.25185e-05	5.18068e-05	2.76068e-05	3.78068e-05	5.18068e-05	4.24068e-05	1.50068e-05	1.70678e-06	5.18068e-05	6.18258e-05	4.26068e-05	0	7.46748e-05
G380	2.00331e-05	4.99e-05	0	8.13e-05	4.34e-05	3.89266e-05		1.00172e-05	2.00302e-05	5.23e-05	2.43647e-05	1e-05	5.5e-05	1.52e-05	2e-05	1.35e-05	6.41e-05	5.02e-05	5.01e-05	2e-05	5.79e-05	2e-05	1.13e-05		G380	0	0	1.33734e-05	0	0	1.60734e-05	0	0	0	2.51734e-05	1.12734e-05	1.11734e-05	0	1.89734e-05	0	0
C380	0.000120198	4.99e-05	0	6.97e-05	0.000195389	8.70375e-05		0.000250431	0.000330499	0.000240437	0.000402017	0.0001704	0.000187128	6.1e-05	0.000150346	0.000161651	0.000149593	0.000401232	0.000210522	0.000170373	0.000161983	0.000230549	0.000327899		C380	0.000163393	0.000243462	0.0001534	0.00031498	8.33625e-05	0.000100091	0	6.33085e-05	7.46135e-05	6.25555e-05	0.000314195	0.000123485	8.33355e-05	7.49455e-05	0.000143512	0.000240862
A381	0.000130775	8.72e-05	7.07e-05	5.82e-05	5.43e-05	8.02351e-05		8.03503e-05	8.03358e-05	0.00012546	6.09191e-05	0.000120353	6.6e-05	0.000121946	0.000110715	8.09e-05	3.2e-05	7.05e-05	9.03e-05	0.000140387	9.25e-05	8.05e-05	6.78e-05		A381	1.15228e-07	1.00704e-07	4.52249e-05	0	4.01179e-05	0	4.17109e-05	3.04799e-05	6.649e-07	0	0	1.00649e-05	6.01519e-05	1.22649e-05	2.649e-07	0
G381	0	3.74e-05	0.000141353	8.15e-05	7.61e-05	6.72706e-05		1.00438e-05	7.02938e-05	3.14e-05	1.21838e-05	2.01e-05	4.4e-05	3.05e-05	1.01e-05	0	2.14e-05	0	1e-05	1e-05	1.16e-05	3.02e-05	0		G381	0	3.02323e-06	0	0	0	0	0	0	0	0	0	0	0	0	0	0
C381	0.000120716	0.000174418	0.000413962	9.31e-05	0.000152136	0.000190866		0.000321401	0.000512141	0.00073185	0.000389883	0.000381117	0.000374251	0.000289621	0.000281821	0.000229135	0.000170867	0.000251876	0.000170565	0.000210581	0.000358576	0.000392528	0.000192203		C381	0.000130535	0.000321274	0.000540984	0.000199016	0.000190251	0.000183385	9.87546e-05	9.09546e-05	3.82686e-05	0	6.10096e-05	0	1.97146e-05	0.00016771	0.000201662	1.33663e-06
A382	4.02447e-05	3.74e-05	8.08e-05	2.33e-05	5.44e-05	4.72289e-05		0	5.02735e-05	0	4.87359e-05	3.01e-05	4.41e-05	3.05e-05	6.04e-05	4.05e-05	2.14e-05	0.000100711	5.02e-05	2.01e-05	2.31e-05	4.03e-05	2.26e-05		A382	0	3.04455e-06	0	1.50697e-06	0	0	0	1.31711e-05	0	0	5.34821e-05	2.97106e-06	0	0	0	0
T382	0.000211285	0.000149592	4.04e-05	0.000221151	7.62e-05	0.000139726		0.000190959	0.000231258	0.000230106	0.000109656	0.000170604	0.000220289	0.000213369	0.000281874	0.000161908	0.000278402	0.00018128	0.000230771	0.000100278	0.000150466	0.000171123	0.000169712		T382	5.12331e-05	9.15325e-05	9.03805e-05	0	3.08785e-05	8.05635e-05	7.36435e-05	0.000142148	2.21825e-05	0.000138676	4.15545e-05	9.10455e-05	0	1.07405e-05	3.13975e-05	2.99865e-05
G382	0	0	1.01e-05	2.33e-05	0	6.68e-06		3.01514e-05	2.01094e-05	3.14e-05	2.4368e-05	2.01e-05	3.3e-05	0	2.01e-05	0	0	1.01e-05	3.01e-05	1e-05	5.79e-05	0	0		G382	2.34714e-05	1.34294e-05	2.472e-05	1.7688e-05	1.342e-05	2.632e-05	0	1.342e-05	0	0	3.42e-06	2.342e-05	3.32e-06	5.122e-05	0	0
T383	0.000133086	1.25e-05	5.04e-05	3.5e-05	9.79e-05	6.57773e-05		9.1106e-05	0.000101654	6.27e-05	0.000170447	8.03e-05	0.000175992	0.000182754	0.000122895	9.44e-05	0.000107035	9.21e-05	0.00013059	1e-05	0.000138687	0.000132966	0.000192223		T383	2.53288e-05	3.58767e-05	0	0.00010467	1.45227e-05	0.000110215	0.000116977	5.71177e-05	2.86227e-05	4.12577e-05	2.63227e-05	6.48127e-05	0	7.29097e-05	6.71887e-05	0.000126446
G383	0.000184273	0.000186818	0.000151284	6.99e-05	8.7e-05	0.000135855		0.000445407	0.000223639	0.000344813	0.00056004	0.000311273	0.000362984	0.000289361	0.00031748	0.000134838	0.00018196	0.000398961	0.000190863	0.000170607	0.000439174	0.000255705	0.000271373		G383	0.000309552	8.77835e-05	0.000208958	0.000424185	0.000175418	0.000227129	0.000153506	0.000181625	0	4.61049e-05	0.000263106	5.50079e-05	3.47519e-05	0.000303319	0.00011985	0.000135518
C383	0.000122849	3.74e-05	2.02e-05	0.000104868	7.61e-05	7.22834e-05		9.1106e-05	6.09923e-05	0.000135835	7.30487e-05	6.02e-05	6.6e-05	0	0.000296997	8.09e-05	7.49e-05	0.000184136	0.000110499	0.000160572	4.62e-05	0.000255705	0.000113072		C383	1.88227e-05	0	6.35516e-05	7.65314e-07	0	0	0	0.000224714	8.61663e-06	2.61663e-06	0.000111853	3.82156e-05	8.82886e-05	0	0.000183422	4.07886e-05
A384	0.000110533	4.93e-05	6.04e-05	3.45e-05	6.45e-05	6.38466e-05		6.02138e-05	5.0229e-05	7.23e-05	4.82044e-05	0.000150476	2.18e-05	0	5.02e-05	5.34e-05	7.41e-05	0.000100569	0.00012043	5.01e-05	4.57e-05	6.03e-05	8.95e-05		A384	0	0	8.45345e-06	0	8.66294e-05	0	0	0	0	1.02534e-05	3.67224e-05	5.65834e-05	0	0	0	2.56534e-05
G384	3.01453e-05	6.16e-05	6.04e-05	0.000103416	9.67e-05	7.04523e-05		3.01069e-05	1.00458e-05	4.13e-05	2.41022e-05	4.01e-05	5.44e-05	7.53e-05	0	9.34e-05	0.000116417	4.02e-05	5.02e-05	3.01e-05	6.86e-05	0	3.35e-05		G384	0	0	0	0	0	0	4.84774e-06	0	2.29477e-05	4.59647e-05	0	0	0	0	0	0
C384	0.000100484	7.39e-05	2.01e-05	0.000114907	8.6e-05	7.90783e-05		0.000280998	0.000351603	0.000320155	0.000421788	0.000150476	9.8e-05	0.000391472	0.000271185	0.000106748	0.000243417	0.00013074	0.000180645	0.000210484	0.000102903	0.000211032	0.000234842		C384	0.000201919	0.000272525	0.000241077	0.00034271	7.13977e-05	1.89217e-05	0.000312394	0.000192107	2.76697e-05	0.000164339	5.16617e-05	0.000101567	0.000131406	2.38247e-05	0.000131954	0.000155764
A385	8.09561e-05	9.84e-05	8.06e-05	3.44e-05	0.000128833	8.46378e-05		0.000171157	5.04561e-05	0.000144549	4.81319e-05	6.02e-05	5.44e-05	0.00012038	0.000111209	0.000119963	1.06e-05	0.000131475	9.03e-05	9.02e-05	8e-05	7.07e-05	4.47e-05		A385	8.65192e-05	0	5.99112e-05	0	0	0	3.57422e-05	2.65712e-05	3.53252e-05	0	4.68372e-05	5.66218e-06	5.56218e-06	0	0	0
G385	0	2.46e-05	6.05e-05	5.74e-05	2.15e-05	3.28e-05		1.00681e-05	2.01824e-05	1.03e-05	2.40659e-05	0	1.09e-05	3.01e-05	0	5.33e-05	3.17e-05	2.02e-05	2.01e-05	0	2.29e-05	4.04e-05	2.24e-05		G385	0	0	0	0	0	0	0	0	2.05e-05	0	0	0	0	0	7.6e-06	0
C385	0.000101195	4.92e-05	0	0	3.22e-05	3.6519e-05		0.000120817	0.000272463	0.000196174	0.000433187	0.00032104	0.000206764	0.000240761	0.000232528	8e-05	0.000158718	0.000151702	0.000200719	0.000160424	0.000194266	0.000414321	0.000346454		C385	8.42977e-05	0.000235944	0.000159655	0.000396668	0.000284521	0.000170245	0.000204242	0.000196009	4.3481e-05	0.000122199	0.000115183	0.0001642	0.000123905	0.000157747	0.000377802	0.000309935
A386	0.000110389	2.43e-05	3.03e-05	4.55e-05	6.37e-05	5.48377e-05		0.000150642	0.000130445	2.04e-05	8.32758e-05	3.01e-05	2.15e-05	0.000104145	0.000130537	6.6e-05	8.39e-05	8.05e-05	4.02e-05	5.02e-05	5.65e-05	9.04e-05	3.32e-05		A386	9.5804e-05	7.56071e-05	0	2.84381e-05	0	0	4.93073e-05	7.56993e-05	1.11623e-05	2.90623e-05	2.56623e-05	0	0	1.66229e-06	3.55623e-05	0
T386	0.000140495	0.000303977	0.000111039	4.55e-05	0.000148592	0.000149921		0.000241027	0.000230787	0.000101989	0.000202241	0.000230787	3.23e-05	0.000178534	0.000200825	0.000171558	0.000125871	0.000171059	0.000150655	0.000251047	6.78e-05	0.000261272	0.000265287		T386	9.11063e-05	8.08665e-05	0	5.23208e-05	8.08665e-05	0	2.86135e-05	5.09045e-05	2.16375e-05	0	2.11385e-05	7.34492e-07	0.000101126	0	0.000111351	0.000115366
G386	5.01766e-05	6.08e-05	2.02e-05	2.27e-05	5.31e-05	4.13953e-05		2.00856e-05	4.01369e-05	0	5.94827e-05	2.01e-05	3.23e-05	0	5.02e-05	1.32e-05	1.05e-05	2.01e-05	2.01e-05	6.03e-05	9.04e-05	4.02e-05	4.42e-05		G386	0	0	0	1.80874e-05	0	0	0	8.80468e-06	0	0	0	0	1.89047e-05	4.90047e-05	0	2.80468e-06
T387	2.04007e-05	2.43e-05	0	1.14e-05	2.12e-05	1.54601e-05		8.09995e-05	4.06483e-05	4.08e-05	4.75568e-05	1e-05	1.07e-05	7.43e-05	0	3.95e-05	1.05e-05	3.06e-05	5.02e-05	1e-05	3.39e-05	6.11e-05	1.1e-05		T387	6.55394e-05	2.51882e-05	2.53399e-05	3.20966e-05	0	0	5.88399e-05	0	2.40399e-05	0	1.51399e-05	3.47399e-05	0	1.84399e-05	4.56399e-05	0
G387	0.000326411	0.000206544	6.06e-05	0.000227035	0.000222578	0.000208634		0.000445497	0.000609725	0.000478917	0.000511235	0.00044163	0.00031163	0.000416171	0.000397785	0.000448023	0.000261904	0.000387553	0.000502119	0.000401586	0.000429257	0.000447983	0.000342435		G387	0.000236864	0.000401092	0.000270283	0.000302602	0.000232996	0.000102996	0.000207537	0.000189151	0.000239389	5.32705e-05	0.000178919	0.000293485	0.000192952	0.000220623	0.000239349	0.000133801
C387	7.14023e-05	8.5e-05	0.000232211	0.000124869	9.54e-05	0.000121776		7.08746e-05	0.000121945	3.06e-05	7.13352e-05	2.01e-05	8.6e-05	0.000133769	0.000101996	5.27e-05	2.1e-05	7.14e-05	6.03e-05	7.03e-05	9.04e-05	0.000111996	6.63e-05		C387	0	1.68555e-07	0	0	0	0	1.19925e-05	0	0	0	0	0	0	0	0	0
A388	0.000110544	0.000109323	8.08e-05	7.96e-05	0.000243931	0.00012484		0.000150846	0.000110626	4.07e-05	7.13258e-05	0.000140801	0.000128993	7.43e-05	0.000120707	0.000158203	0.000115349	0.000171406	0.000151016	0.000110734	4.52e-05	0.000100627	0.000143599		A388	2.60067e-05	0	0	0	1.59614e-05	4.15342e-06	0	0	3.33634e-05	0	4.65664e-05	2.61764e-05	0	0	0	1.87594e-05
T388	5.02472e-05	8.5e-05	7.07e-05	3.41e-05	4.24e-05	5.64894e-05		7.03949e-05	3.01708e-05	2.04e-05	7.13258e-05	5.03e-05	3.22e-05	0	4.02e-05	6.59e-05	0	9.07e-05	0.000100678	7.05e-05	1.13e-05	1.01e-05	6.63e-05		T388	1.39055e-05	0	0	1.48364e-05	0	0	0	0	9.41056e-06	0	3.42106e-05	4.41886e-05	1.40106e-05	0	0	9.81056e-06
C388	5.02472e-05	2.43e-05	7.07e-05	2.27e-05	2.12e-05	3.78294e-05		3.01692e-05	0	2.04e-05	0	2.01e-05	1.07e-05	0	0	2.64e-05	0	2.02e-05	3.02e-05	0	2.26e-05	3.02e-05	4.42e-05		C388	0	0	0	0	0	0	0	0	0	0	0	0	0	0	0	6.37056e-06
A389	4.01768e-05	7.3e-05	0.000172358	7.97e-05	4.25e-05	8.1547e-05		0.000120558	4.01901e-05	0.000112198	9.52778e-05	0.000130952	6.46e-05	1.49e-05	6.03e-05	0.000118865	7.35e-05	0.000100716	5.03e-05	5.03e-05	0.000147002	8.05e-05	0.000121679		A389	3.90112e-05	0	3.0651e-05	1.37308e-05	4.9405e-05	0	0	0	3.7318e-05	0	1.9169e-05	0	0	6.5455e-05	0	4.0132e-05
T389	0.000140619	0.00010951	0.000162219	0.000113882	0.000106253	0.000126497		0.000241116	0.000291378	7.14e-05	0.000131007	0.000231684	0.000183138	5.95e-05	0.000180943	6.6e-05	0.000105025	0.000151074	0.000171154	0.000110623	0.000214849	0.000191107	8.85e-05		T389	0.00011462	0.000164882	0	4.51042e-06	0.000105187	5.66415e-05	0	5.44465e-05	0	0	2.45775e-05	4.46575e-05	0	8.83525e-05	6.46105e-05	0
G389	0	0	5.07e-05	0	2.13e-05	1.44e-05		0	2.0095e-05	0	0	1.01e-05	0	4.46e-05	2.01e-05	2.64e-05	0	1.01e-05	2.01e-05	2.01e-05	0	1.01e-05	2.21e-05		G389	0	5.69505e-06	0	0	0	0	3.02e-05	5.7e-06	1.2e-05	0	0	5.7e-06	5.7e-06	0	0	7.7e-06
A390	9.06262e-05	6.08e-05	4.02e-05	0.000114082	0.000148732	9.0888e-05		8.05453e-05	0.000110764	0.000112136	0.000107043	0.000181455	0.000118395	0.000104072	5.04e-05	0.000145343	0.000157593	8.08e-05	9.08e-05	0.000110837	0.000113039	0.000100815	0.000154761		A390	0	1.98762e-05	2.1248e-05	1.61554e-05	9.0567e-05	2.7507e-05	1.3184e-05	0	5.4455e-05	6.6705e-05	0	0	1.9949e-05	2.2151e-05	9.92695e-06	6.3873e-05
T390	0.0002316	0.000109453	6.04e-05	0.000148307	0.000127485	0.000135449		0.000161091	0.000161112	0.000101942	0.000202193	0.000201617	0.000193738	0.00011894	0.000161284	0.000171769	0.000147087	0.000151486	0.000252298	0.000201521	0.000192166	0.000201629	0.000132652		T390	2.56415e-05	2.56626e-05	0	6.67441e-05	6.61679e-05	5.82889e-05	0	2.58349e-05	3.63199e-05	1.16379e-05	1.60369e-05	0.000116849	6.60719e-05	5.67169e-05	6.61799e-05	0
G390	0	0	2.01e-05	1.14e-05	0	6.3e-06		0	1.00695e-05	2.04e-05	2.37874e-05	2.02e-05	3.23e-05	4.46e-05	1.01e-05	0	2.1e-05	5.05e-05	3.03e-05	3.02e-05	3.39e-05	0	1.11e-05		G390	0	3.76948e-06	1.41e-05	1.74874e-05	1.39e-05	2.6e-05	3.83e-05	3.8e-06	0	1.47e-05	4.42e-05	2.4e-05	2.39e-05	2.76e-05	0	4.8e-06
A391	0.000190832	8.46e-05	0.00011066	3.4e-05	8.45e-05	0.000100918		0.000160767	0.00014061	5.07e-05	5.9166e-05	8.04e-05	0.000256792	8.87e-05	0.000120702	9.19e-05	9.39e-05	9.07e-05	0.000110562	6.03e-05	5.62e-05	6.04e-05	7.7e-05		A391	5.98485e-05	3.96918e-05	0	0	0	0.000155874	0	1.97836e-05	0	0	0	9.64359e-06	0	0	0	0
T391	0.000341489	0.00024182	5.03e-05	0.000113282	0.000243013	0.000197981		0.000251198	0.000411787	0.000111539	0.000283997	0.000221012	0.000246092	0.000207024	0.000120702	0.000525238	0.000156566	0.000161167	0.000120613	0.000180901	0.000157459	0.000271616	0.000242083		T391	5.32174e-05	0.000213806	0	8.6016e-05	2.30312e-05	4.81112e-05	9.04322e-06	0	0.000327257	0	0	0	0	0	7.36352e-05	4.41022e-05
G391	1.00438e-05	0	0.000130779	2.27e-05	0	3.27046e-05		2.00959e-05	1.00436e-05	3.04e-05	0	3.01e-05	3.21e-05	2.96e-05	4.02e-05	0	0	0	1.01e-05	3.02e-05	1.12e-05	2.01e-05	2.2e-05		G391	0	0	0	0	0	0	0	7.49544e-06	0	0	0	0	0	0	0	0
A392	0.000140341	9.5e-05	7.03e-05	0.000111248	0.000124515	0.000108281		0.000180504	0.000160329	4.02e-05	0.000151309	0.000180661	0.000105292	8.72e-05	0.000180607	0.000206572	0.00016429	0.000231061	0.000160668	0.000150563	0.000110536	0.000170601	0.00013006		A392	7.22228e-05	5.20479e-05	0	4.3028e-05	7.23802e-05	0	0	7.23262e-05	9.82912e-05	5.60092e-05	0.00012278	5.23872e-05	4.22822e-05	2.25519e-06	6.23202e-05	2.17792e-05
T392	3.00731e-05	2.38e-05	5.02e-05	2.22e-05	3.11e-05	3.14746e-05		8.02238e-05	0.000100205	6.02e-05	5.81957e-05	6.02e-05	5.26e-05	1.45e-05	2.01e-05	3.87e-05	1.03e-05	5.02e-05	3.01e-05	6.02e-05	2.21e-05	1e-05	6.5e-05		T392	4.87492e-05	6.87308e-05	2.87254e-05	2.67211e-05	2.87254e-05	2.11254e-05	0	0	7.22538e-06	0	1.87254e-05	0	2.87254e-05	0	0	3.35254e-05
C392	6.01462e-05	3.56e-05	1e-05	1.11e-05	3.11e-05	2.95892e-05		0	3.00616e-05	3.01e-05	4.65566e-05	0	4.21e-05	2.91e-05	1e-05	2.58e-05	0	1e-05	0	0	2.21e-05	3.01e-05	1.08e-05		C392	0	4.72395e-07	5.10769e-07	1.69673e-05	0	1.25108e-05	0	0	0	0	0	0	0	0	5.10769e-07	0
T393	9.06728e-05	0.000107506	9.03e-05	2.26e-05	8.39e-05	7.89958e-05		8.07274e-05	0.000100807	0.000152019	7.02247e-05	9.1e-05	4.24e-05	0.000160619	0.000111159	0.000183033	0.000124951	7.09e-05	0.000141878	0.000151725	6.67e-05	0.000161745	6.54e-05		T393	1.7316e-06	2.18117e-05	7.30232e-05	0	1.20042e-05	0	8.16232e-05	3.21632e-05	0.000104037	4.59552e-05	0	6.28822e-05	7.27292e-05	0	8.27492e-05	0
G393	0.000161196	0.000274738	4.01e-05	0.000338696	0.000419639	0.000246874		0.000312818	0.000443553	0.000557402	0.00053839	0.000485319	0.000465968	0.000525663	0.000293057	0.000352992	0.000426914	0.000435633	0.00036483	0.00042483	0.0003335	0.000343709	0.000327132		G393	6.59447e-05	0.000196679	0.000310528	0.000291516	0.000238445	0.000219094	0.000278789	4.61832e-05	0.000106118	0.00018004	0.000188759	0.000117956	0.000177956	8.66262e-05	9.68352e-05	8.02582e-05
C393	4.0299e-05	7.17e-05	0.000190665	0.000101609	5.25e-05	9.13546e-05		3.02728e-05	6.04845e-05	0.000172288	0	3.03e-05	0	4.38e-05	5.05e-05	0.00010459	9.37e-05	7.09e-05	5.07e-05	5.06e-05	8.89e-05	0.000101091	4.36e-05		C393	0	0	8.09334e-05	0	0	0	0	0	1.32354e-05	2.3454e-06	0	0	0	0	9.7364e-06	0
A394	6.08945e-05	3.54e-05	0.000130584	6.64e-05	9.28e-05	7.72157e-05		0.00010132	9.1365e-05	1e-05	3.47154e-05	2.01e-05	6.29e-05	7.22e-05	7.1e-05	7.71e-05	6.14e-05	0.000101706	0.000100715	4.03e-05	9.9e-05	6.09e-05	1.08e-05		A394	2.41045e-05	1.41493e-05	0	0	0	0	0	0	0	0	2.44903e-05	2.34993e-05	0	2.17843e-05	0	0
T394	8.11927e-05	3.54e-05	0.000130584	8.85e-05	3.09e-05	7.33153e-05		6.07921e-05	5.07583e-05	4.02e-05	2.31436e-05	6.04e-05	4.19e-05	0	6.09e-05	7.71e-05	4.09e-05	8.14e-05	3.02e-05	3.02e-05	1.1e-05	6.09e-05	5.39e-05		T394	0	0	0	0	0	0	0	0	3.78466e-06	0	8.08466e-06	0	0	0	0	0
C394	3.04473e-05	0	1e-05	1.11e-05	2.06e-05	1.44295e-05		0	0	1e-05	1.15718e-05	0	1.05e-05	0	0	0	1.02e-05	2.03e-05	0	0	2.2e-05	0	0		C394	0	0	0	0	0	0	0	0	0	0	5.87055e-06	0	0	7.57055e-06	0	0
T395	5.3187e-05	1.19e-05	9.03e-05	2.24e-05	5.22e-05	4.59974e-05		3.15863e-05	3.19095e-05	3.04e-05	2.32905e-05	7.12e-05	7.39e-05	2.91e-05	5.3e-05	3.9e-05	7.25e-05	9.61e-05	4.08e-05	4.1e-05	0	3.18e-05	4.35e-05		T395	0	0	0	0	2.52026e-05	2.79026e-05	0	7.00261e-06	0	2.65026e-05	5.01026e-05	0	0	0	0	0
G395	0.000148923	0.00014246	3.01e-05	0.000123356	0.000114908	0.000111949		0.00025269	0.000255276	0.000506473	0.000419229	0.000264488	0.000211135	0.000188967	0.000233412	0.000169009	0.000103625	0.000245627	0.00034701	0.00030716	0.000133151	0.000212244	0.000304805		G395	0.000140741	0.000143326	0.000394524	0.000307279	0.000152539	9.91855e-05	7.70175e-05	0.000121463	5.70595e-05	0	0.000133678	0.000235061	0.000195211	2.12015e-05	0.000100295	0.000192856
C395	0.000148923	0.000106845	7.03e-05	0.000112142	0.000167138	0.00012107		0.000147403	0.000127638	0.000121553	5.82262e-05	0.000172935	0.000168908	4.36e-05	0.000180364	0.000143008	0.000227975	0.000213589	0.000193917	0.000276444	0.000110959	9.55e-05	8.71e-05		C395	2.63329e-05	6.56815e-06	4.83301e-07	0	5.18653e-05	4.78383e-05	0	5.92943e-05	2.19383e-05	0.000106905	9.25193e-05	7.28473e-05	0.000155374	0	0	0
A396	4.15071e-05	1.18e-05	3.01e-05	2.22e-05	1.03e-05	2.31814e-05		0	1.04105e-05	0	1.15733e-05	2.01e-05	5.25e-05	2.89e-05	3.11e-05	0	3.08e-05	2.09e-05	1.01e-05	0	2.2e-05	2.07e-05	0		A396	0	0	0	0	0	2.93186e-05	5.71858e-06	7.91858e-06	0	7.61858e-06	0	0	0	0	0	0
G396	2.07536e-05	5.9e-05	4.01e-05	0.000210638	0.000134459	9.29901e-05		1.02828e-05	3.12315e-05	0.000100669	2.31465e-05	0.000110734	5.25e-05	0.000115515	2.07e-05	0.000115957	0.000123048	3.13e-05	8.06e-05	4.03e-05	0.000143285	6.21e-05	4.32e-05		G396	0	0	7.67889e-06	0	1.77439e-05	0	2.25249e-05	0	2.29669e-05	3.00579e-05	0	0	0	5.02949e-05	0	0
C396	0.000124521	0.000176977	9.02e-05	4.43e-05	0.00010343	0.000107886		0.000205656	0.000239441	0.000372477	0.000219892	0.000271802	0.000251802	0.000303227	0.000155365	0.000115957	0.000123048	0.000219026	0.000231778	0.00016107	0.000220439	0.000113854	0.000129735		C396	9.77699e-05	0.000131555	0.000264591	0.000112006	0.000163916	0.000143916	0.000195341	4.74793e-05	8.07133e-06	1.51623e-05	0.00011114	0.000123892	5.31843e-05	0.000112553	5.96833e-06	2.18493e-05
A397	9.09615e-05	9.34e-05	9.03e-05	6.59e-05	8.19e-05	8.44923e-05		0.000110753	9.13566e-05	5.02e-05	0.00013752	7.04e-05	7.27e-05	0.000142782	8.09e-05	1.28e-05	7.1e-05	6.12e-05	0.00011066	3.02e-05	7.64e-05	5.05e-05	9.63e-05		A397	2.62608e-05	6.86435e-06	0	5.30278e-05	0	0	5.82897e-05	0	0	0	0	2.61677e-05	0	0	0	1.18077e-05
G397	2.02137e-05	8.17e-05	7.02e-05	9.88e-05	8.19e-05	7.05627e-05		3.02054e-05	2.03015e-05	1e-05	4.584e-05	3.02e-05	0.000124586	0.000185616	2.02e-05	6.38e-05	6.08e-05	2.04e-05	4.02e-05	4.02e-05	5.46e-05	1.01e-05	3.21e-05		G397	0	0	0	0	0	5.40233e-05	0.000115053	0	0	0	0	0	0	0	0	0
C397	0.000111175	8.17e-05	0.000130411	0.000109795	6.14e-05	9.88962e-05		0.000140959	0.000507537	8.04e-05	0.00033234	0.000261328	0.000155733	0.000199894	0.000182013	0.000102015	0.00011154	0.000254842	6.04e-05	0.000201136	9.82e-05	0.000262457	0.000128396		C397	4.20623e-05	0.000408641	0	0.000233444	0.000162432	5.68368e-05	0.000100998	8.31168e-05	3.11878e-06	1.26438e-05	0.000155946	0	0.00010224	0	0.000163561	2.94998e-05
A398	4.01534e-05	1.16e-05	3.01e-05	8.74e-05	3.06e-05	3.99707e-05		2.00946e-05	0.00012049	0.000110529	4.56152e-05	4.02e-05	4.13e-05	1.42e-05	8.04e-05	3.81e-05	6.06e-05	6.04e-05	2.01e-05	6.02e-05	1.09e-05	3.02e-05	7.46e-05		A398	0	8.05197e-05	7.05583e-05	5.64456e-06	2.29323e-07	1.32932e-06	0	4.04293e-05	0	2.06293e-05	2.04293e-05	0	2.02293e-05	0	0	3.46293e-05
T398	0.000210805	0.000220374	0.000150637	0.000109271	0.000152774	0.000168772		0.000361704	0.000341389	0.000221059	7.98267e-05	0.000371464	0.000216929	0.00025562	0.000281529	0.00021587	0.000222222	0.000271955	0.000271144	0.000170662	0.000271362	0.000311843	0.000138537		T398	0.000192931	0.000172617	5.22867e-05	0	0.000202692	4.81567e-05	8.68477e-05	0.000112757	4.70977e-05	5.34497e-05	0.000103183	0.000102372	1.88974e-06	0.00010259	0.000143071	0
G398	1.00383e-05	1.16e-05	2.01e-05	0	5.09e-05	1.85277e-05		0	0	7.03e-05	0	0	1.03e-05	7.1e-05	4.02e-05	1.27e-05	3.03e-05	0	0	4.02e-05	6.51e-05	3.02e-05	5.33e-05		G398	0	0	5.17723e-05	0	0	0	5.24723e-05	2.16723e-05	0	1.17723e-05	0	0	2.16723e-05	4.65723e-05	1.16723e-05	3.47723e-05
A399	0.000161347	0.000218841	0.000140716	0.00018449	0.000141733	0.000169425		0.000464506	0.000343393	0.000241444	0.000305873	0.000302301	0.000215874	0.000282207	0.000313359	0.000189435	0.000212273	0.000253306	0.000221911	0.00018164	0.000215485	0.000364376	0.000243802		A399	0.00029508	0.000173967	7.20186e-05	0.000136447	0.000132876	4.64486e-05	0.000112782	0.000143934	2.00096e-05	4.28476e-05	8.38806e-05	5.24856e-05	1.22146e-05	4.60596e-05	0.000194951	7.43766e-05
T399	4.03368e-05	4.61e-05	0.000201023	6.51e-05	5.06e-05	8.0632e-05		7.06857e-05	6.05987e-05	4.02e-05	4.53145e-05	0.000100767	4.11e-05	4.23e-05	8.09e-05	2.53e-05	5.05e-05	5.07e-05	0	7.06e-05	9.7e-05	9.11e-05	2.12e-05		T399	0	0	0	0	2.0135e-05	0	0	2.68038e-07	0	0	0	0	0	1.6368e-05	1.0468e-05	0
C399	1.00842e-05	2.3e-05	0.000100512	1.09e-05	2.02e-05	3.29392e-05		0	4.03991e-05	3.02e-05	1.13286e-05	2.02e-05	3.08e-05	0	2.02e-05	3.79e-05	5.05e-05	4.05e-05	3.03e-05	3.03e-05	0	0	2.12e-05		C399	0	7.4599e-06	0	0	0	0	0	0	4.96076e-06	1.75608e-05	7.56076e-06	0	0	0	0	0
T400	7.13885e-05	8.07e-05	2.01e-05	0.000141244	0.000202548	0.000103196		7.13623e-05	0.00014298	9.07e-05	0.000102043	6.06e-05	0.000113171	0.000127102	0.000102338	7.59e-05	0.000151974	0.000123203	5.05e-05	0.000111125	0.000215831	0.000133111	6.36e-05		T400	0	3.97836e-05	0	0	0	9.9749e-06	2.39059e-05	0	0	4.87779e-05	2.00069e-05	0	7.9289e-06	0.000112635	2.99149e-05	0
G400	0.000203967	0.000242008	4.02e-05	0.000141244	0.000101274	0.000145739		0.000479147	0.000357449	0.00039301	0.000328806	0.000484511	0.000277783	0.00028245	0.000255846	0.000354036	0.000222895	0.000338809	0.000373715	0.00036368	0.000258997	0.000399332	0.00042425		G400	0.000333408	0.000211711	0.000247271	0.000183067	0.000338772	0.000132044	0.000136711	0.000110107	0.000208297	7.71564e-05	0.00019307	0.000227976	0.000217941	0.000113258	0.000253593	0.000278511
C400	7.13885e-05	6.91e-05	0.000100379	9.78e-05	5.06e-05	7.78535e-05		9.17515e-05	6.1277e-05	2.02e-05	3.40144e-05	0.00010094	5.14e-05	1.41e-05	7.16e-05	8.85e-05	3.04e-05	0.000102669	0.000101004	9.09e-05	4.32e-05	6.14e-05	4.24e-05		C400	1.3898e-05	0	0	0	2.30865e-05	0	0	0	1.06465e-05	0	2.48155e-05	2.31505e-05	1.30465e-05	0	0	0
A401	1.01374e-05	2.3e-05	5.02e-05	5.4e-05	6.05e-05	3.95675e-05		1.01272e-05	6.0936e-05	3.01e-05	2.25953e-05	4.02e-05	6.15e-05	0	6.1e-05	2.52e-05	5.03e-05	6.11e-05	5.02e-05	3.01e-05	2.15e-05	2.03e-05	3.17e-05		A401	0	2.13685e-05	0	0	6.32528e-07	2.19325e-05	0	2.14325e-05	0	1.07325e-05	2.15325e-05	1.06325e-05	0	0	0	0
T401	0.000375082	9.18e-05	1e-05	0.000302598	0.000302419	0.00021638		0.000536741	0.00040624	0.000431792	0.000372822	0.000391798	0.000348325	0.000295296	0.00049778	0.000276743	0.000312163	0.000377085	0.000331595	0.000391798	0.000354724	0.000416624	0.000306509		T401	0.000320362	0.00018986	0.000215412	0.000156443	0.000175418	0.000131945	7.89161e-05	0.0002814	6.03631e-05	9.57831e-05	0.000160705	0.000115215	0.000175418	0.000138344	0.000200244	9.01291e-05
G401	1.01374e-05	1.15e-05	9.04e-05	0	1.01e-05	2.44275e-05		1.01272e-05	7.1092e-05	0	0	2.01e-05	1.02e-05	7.03e-05	3.05e-05	1.26e-05	1.01e-05	3.06e-05	0	3.01e-05	0	2.03e-05	0		G401	0	4.66645e-05	0	0	0	0	4.58725e-05	6.07253e-06	0	0	6.17253e-06	0	5.67253e-06	0	0	0
A402	8.07005e-05	0.000148231	2.01e-05	0.000172509	0.000161484	0.000116605		0.000272551	0.000312677	0.000241505	0.00025834	0.000272144	0.000224272	0.000209711	0.0002831	0.000238349	0.000192417	0.000202725	0.000191669	0.000181954	0.000256583	0.000263041	0.000252382		A402	0.000155946	0.000196072	0.0001249	0.000141735	0.000155539	0.000107667	9.31061e-05	0.000166495	0.000121744	7.58121e-05	8.61201e-05	7.50641e-05	6.53491e-05	0.000139978	0.000146436	0.000135777
T402	0.000131138	0.000102621	0.000150657	8.63e-05	0.000121113	0.000118366		0.000252362	0.000161381	0.00011069	0.000134786	4.03e-05	5.1e-05	0.000153788	8.09e-05	0.000125447	0.000101272	0.000131771	7.06e-05	0.000121303	0.000149673	0.000161871	0.000126191		T402	0.000133996	4.30156e-05	0	1.64202e-05	0	0	3.54221e-05	0	7.08114e-06	0	1.34051e-05	0	2.93714e-06	3.13071e-05	4.35051e-05	7.82514e-06
C402	0	1.14e-05	2.01e-05	2.16e-05	1.01e-05	1.264e-05		2.0189e-05	0	0	4.49287e-05	1.01e-05	1.02e-05	2.8e-05	1.01e-05	0	0	2.03e-05	4.04e-05	2.02e-05	1.07e-05	2.02e-05	0		C402	7.54897e-06	0	0	3.22887e-05	0	0	1.536e-05	0	0	0	7.66e-06	2.776e-05	7.56e-06	0	7.56e-06	0
A403	0.000221555	0.000102457	7.03e-05	0.000161612	0.000121268	0.000135438		0.000141296	0.00022164	8.05e-05	0.000101059	8.07e-05	0.000254673	0.00016764	0.000191615	0.000162809	0.000151931	0.000243053	0.000222162	0.000121297	0.000138827	0.000262711	0.000178708		A403	5.85722e-06	8.62017e-05	0	0	0	0.000119235	3.22015e-05	5.61765e-05	2.73705e-05	1.64925e-05	0.000107615	8.67235e-05	0	3.38854e-06	0.000127273	4.32695e-05
T403	8.05656e-05	0.000170761	0.000170762	0.00018316	7.07e-05	0.00013519		0.000121111	0.000120895	0.000201347	0.000190889	0.000121122	0.000101869	8.38e-05	0.00010085	0.000150286	0.000101287	0.000202544	8.08e-05	0.000161729	9.61e-05	0.00014146	0.000157684		T403	0	0	6.61573e-05	5.56993e-05	0	0	0	0	1.50963e-05	0	6.73543e-05	0	2.65393e-05	0	6.27029e-06	2.24943e-05
C403	3.02121e-05	7.97e-05	2.01e-05	2.15e-05	1.01e-05	3.23224e-05		2.01851e-05	2.01491e-05	0	5.61438e-05	1.01e-05	4.07e-05	0	0	2.5e-05	2.03e-05	0	2.02e-05	2.02e-05	0	2.02e-05	2.1e-05		C403	0	0	0	2.38214e-05	0	8.37758e-06	0	0	0	0	0	0	0	0	0	0
A404	0.000212611	0.00020123	0.000110707	0.000106209	0.000151724	0.000156496		0.000253329	0.000202495	0.000161201	0.000287312	0.000313169	9.08e-05	9.61e-05	0.000141876	0.000172908	0.000212958	0.000223802	0.000272711	0.000212254	0.000242075	0.000203087	0.000227892		A404	9.68326e-05	4.59986e-05	4.70483e-06	0.000130816	0.000156673	0	0	0	1.64118e-05	5.64618e-05	6.73058e-05	0.000116215	5.57578e-05	8.55788e-05	4.65908e-05	7.13958e-05
T404	6.0746e-05	5.59e-05	0	6.37e-05	6.07e-05	4.82092e-05		0.000182397	0.000242994	8.06e-05	0.000121555	0.000131329	8.07e-05	9.61e-05	0.00015201	7.41e-05	0.000111549	0.000172938	9.09e-05	8.09e-05	6.31e-05	0.000172624	9.32e-05		T404	0.000134188	0.000194784	3.23908e-05	7.33458e-05	8.31198e-05	3.24908e-05	4.78908e-05	0.000103801	2.58908e-05	6.33398e-05	0.000124729	4.26908e-05	3.26908e-05	1.48908e-05	0.000124415	4.49908e-05
C404	1.01243e-05	0	1.01e-05	1.06e-05	3.03e-05	1.22249e-05		3.03994e-05	2.02495e-05	1.01e-05	2.21009e-05	2.02e-05	1.01e-05	0	2.03e-05	0	1.01e-05	1.02e-05	1.01e-05	1.01e-05	2.1e-05	0	3.11e-05		C404	1.81746e-05	8.02461e-06	0	9.87605e-06	7.97513e-06	0	0	8.07513e-06	0	0	0	0	0	8.77513e-06	0	1.88751e-05
T405	9.08265e-05	5.57e-05	4.03e-05	3.17e-05	8.06e-05	5.98253e-05		5.05398e-05	5.04806e-05	7.04e-05	2.20192e-05	9.07e-05	8.04e-05	5.47e-05	3.03e-05	6.15e-05	1.01e-05	5.08e-05	6.05e-05	1.01e-05	8.39e-05	3.04e-05	0.000154915		T405	0	0	1.05747e-05	0	3.08747e-05	2.05747e-05	0	0	1.6747e-06	0	0	6.74696e-07	0	2.40747e-05	0	9.50897e-05
G405	0.00027248	8.91e-05	0.000141047	0.00023219	0.000262057	0.000199375		0.000373994	0.000383652	0.000452484	0.00025322	0.000413223	0.000361733	0.000177751	0.000343705	0.000270623	0.000181859	0.000284382	0.000151135	0.000313217	0.000272577	0.000253134	0.000206554		G405	0.00017462	0.000184278	0.000253109	5.38456e-05	0.000213848	0.000162358	0	0.00014433	7.12483e-05	0	8.50073e-05	0	0.000113842	7.32023e-05	5.37593e-05	7.17929e-06
C405	1.00918e-05	1.11e-05	2.01e-05	6.33e-05	0	2.09184e-05		4.04318e-05	5.04806e-05	0.000201104	7.7067e-05	2.02e-05	1e-05	0	5.05e-05	0.000135311	4.04e-05	5.08e-05	5.04e-05	5.05e-05	3.15e-05	4.05e-05	1.03e-05		C405	1.95134e-05	2.95622e-05	0.000180186	5.61487e-05	0	0	0	2.95816e-05	0.000114393	1.94816e-05	2.98816e-05	2.94816e-05	2.95816e-05	1.05816e-05	1.95816e-05	0
A406	0.000160938	0.000244176	0.000131194	0.000179391	0.000182175	0.000179575		0.000161151	0.000120822	0.000110819	0.00017555	0.000211711	0.000272356	0.000272699	0.000130889	0.000245302	0.000192444	0.00020209	0.000191569	9.07e-05	0.000208742	0.00011096	0.000174872		A406	0	0	0	0	3.21361e-05	9.27811e-05	9.31241e-05	0	6.57271e-05	1.28691e-05	2.25151e-05	1.19941e-05	0	2.91671e-05	0	0
T406	0.000120704	0.000177582	0.000171561	7.39e-05	0.000161933	0.000141136		0.000251798	0.000231575	0.000231712	0.000186522	0.000131059	0.00011096	0.00010908	0.000231572	0.000159447	0.000121544	0.000222299	0.000181486	0.000100813	0.000125245	0.000201745	0.000133726		T406	0.000110662	9.04388e-05	9.05761e-05	4.53862e-05	0	0	0	9.04361e-05	1.83111e-05	0	8.11631e-05	4.03501e-05	0	0	6.06091e-05	0
G406	0	5.55e-05	0	0	4.05e-05	1.92e-05		3.02157e-05	2.01369e-05	0	0	2.02e-05	0	2.73e-05	0	2.45e-05	2.03e-05	0	1.01e-05	1.01e-05	2.09e-05	1.01e-05	0		G406	1.10157e-05	9.36931e-07	0	0	1e-06	0	8.1e-06	0	5.3e-06	1.1e-06	0	0	0	1.7e-06	0	0
A407	0.000131047	4.44e-05	0.000150811	0.00022144	0.000202294	0.000149998		0.000110906	0.000171295	0.000110819	9.87394e-05	0.000100889	0.000141236	8.17e-05	9.08e-05	0.000208254	0.000192477	0.000212591	8.07e-05	9.08e-05	0.000135612	0.000181886	0.000102813		A407	0	2.12966e-05	0	0	0	0	0	0	5.82556e-05	4.24786e-05	6.25926e-05	0	0	0	3.18876e-05	0
T407	0.00018145	0.000366028	0.000150811	5.27e-05	0.000202294	0.000190657		0.000252059	0.000282133	0.000201489	0.000219421	0.0002724	0.000151324	0.00014977	0.000252164	0.000306256	0.000202608	0.000131604	0.000141301	0.000191689	0.000156475	0.000212201	2.06e-05		T407	6.14028e-05	9.14764e-05	1.08324e-05	2.87644e-05	8.17434e-05	0	0	6.15074e-05	0.000115599	1.19514e-05	0	0	1.03244e-06	0	2.15444e-05	0
G407	2.01611e-05	0	0	2.11e-05	0	8.25222e-06		3.02471e-05	2.01524e-05	1.01e-05	0	0	1.01e-05	0	2.02e-05	2.45e-05	3.04e-05	2.02e-05	2.02e-05	0	1.04e-05	3.03e-05	2.06e-05		G407	2.19949e-05	1.19001e-05	1.84778e-06	0	0	1.84778e-06	0	1.19478e-05	1.62478e-05	2.21478e-05	1.19478e-05	1.19478e-05	0	2.14778e-06	2.20478e-05	1.23478e-05
A408	7.03829e-05	5.48e-05	6.02e-05	0.000145809	0.000151436	9.65256e-05		0.000150946	0.000110581	6.04e-05	6.50809e-05	0.000110889	0.00012085	5.39e-05	0.000110681	0.00015749	7.07e-05	0.000131138	0.000130955	0.000140974	6.19e-05	0.000131013	7.12e-05		A408	5.44209e-05	1.4055e-05	0	0	1.43634e-05	2.43244e-05	0	1.41554e-05	6.09644e-05	0	3.46124e-05	3.44294e-05	4.44484e-05	0	3.44874e-05	0
T408	0.000241313	0.0002302	1e-05	7.29e-05	8.08e-05	0.000127043		0.000150946	0.000261372	9.06e-05	0.000216936	0.000161294	0.000241699	0.000188509	0.00016099	7.27e-05	0.000141496	0.000171489	0.000120881	0.000130905	0.000185701	0.000211636	0.000152583		T408	2.39039e-05	0.00013433	0	8.98937e-05	3.42515e-05	0.000114656	6.14665e-05	3.39475e-05	0	1.44535e-05	4.44465e-05	0	3.86245e-06	5.86585e-05	8.45935e-05	2.55405e-05
G408	2.01094e-05	1.1e-05	3.01e-05	1.04e-05	0	1.43219e-05		1.00631e-05	1.00528e-05	2.01e-05	2.16936e-05	0	0	2.69e-05	1.01e-05	0	2.02e-05	1.01e-05	3.02e-05	2.01e-05	2.06e-05	2.02e-05	1.02e-05		G408	0	0	5.77812e-06	7.37174e-06	0	0	1.25781e-05	0	0	5.87812e-06	0	1.58781e-05	5.77812e-06	6.27812e-06	5.87812e-06	0
A409	9.05861e-05	5.47e-05	3.04e-05	9.34e-05	7.05e-05	6.79172e-05		7.04828e-05	0.000160993	0.000150631	8.65464e-05	9.05e-05	7.04e-05	0.000134356	9.06e-05	0.000157166	6.05e-05	0.000171573	8.05e-05	9.05e-05	8.24e-05	0.000120996	7.1e-05		A409	2.56559e-06	9.30761e-05	8.27138e-05	1.86291e-05	2.25828e-05	2.48278e-06	6.64388e-05	2.26828e-05	8.92488e-05	0	0.000103656	1.25828e-05	2.25828e-05	1.44828e-05	5.30788e-05	3.08278e-06
T409	0.000291889	0.000207864	0.000233204	7.27e-05	0.000140966	0.000189325		0.000171173	0.000171055	0.000110463	0.000281276	0.000170926	0.000170863	0.000107485	0.000130874	0.000145076	0.000141103	0.000171573	0.000110641	5.03e-05	0.000236825	0.000151245	7.1e-05		T409	0	0	0	9.19512e-05	0	0	0	0	0	0	0	0	0	4.75005e-05	0	0
G409	0.000100651	5.47e-05	5.07e-05	7.27e-05	7.05e-05	6.98502e-05		0.000221517	0.000181117	0.000140589	8.65464e-05	9.05e-05	0.000201015	0.000161227	0.000140941	0.000132987	0.000110867	0.000161481	0.000110641	0.000120627	0.000113264	0.000141162	9.13e-05		G409	0.000151667	0.000111267	7.07388e-05	1.66961e-05	2.06498e-05	0.000131165	9.13768e-05	7.10908e-05	6.31368e-05	4.10168e-05	9.16308e-05	4.07908e-05	5.07768e-05	4.34138e-05	7.13118e-05	2.14498e-05
A410	0.000132404	0.000175005	5.03e-05	0.000228121	0.00013076	0.000143318		0.000315127	0.0002243	0.000271166	0.000140618	0.000251304	0.000130594	0.000201478	0.000346401	0.000253822	0.000120921	0.00024502	0.000161011	0.000170871	0.000185319	0.000213719	0.000243581		A410	0.000171809	8.09817e-05	0.000127848	0	0.000107986	0	5.81599e-05	0.000203083	0.000110504	0	0.000101702	1.76929e-05	2.75529e-05	4.20009e-05	7.04009e-05	0.000100263
T410	9.16646e-05	1.09e-05	1.01e-05	8.3e-05	3.02e-05	4.51729e-05		6.09923e-05	0.000132541	1e-05	0.000118985	3.02e-05	6.03e-05	2.69e-05	2.04e-05	0.000108781	0.000120921	4.08e-05	7.04e-05	8.04e-05	4.12e-05	9.16e-05	6.09e-05		T410	1.58194e-05	8.73679e-05	0	7.38116e-05	0	1.51271e-05	0	0	6.36081e-05	7.57481e-05	0	2.52271e-05	3.52271e-05	0	4.64271e-05	1.57271e-05
C410	2.03699e-05	0	0	0	0	4.07398e-06		1.01654e-05	1.01954e-05	2.01e-05	0	1.01e-05	1e-05	1.34e-05	3.06e-05	1.21e-05	1.01e-05	4.08e-05	1.01e-05	0	2.06e-05	4.07e-05	2.03e-05		C410	6.09141e-06	6.12146e-06	1.6026e-05	0	6.02602e-06	5.92602e-06	9.32602e-06	2.6526e-05	8.02602e-06	6.02602e-06	3.6726e-05	6.02602e-06	0	1.6526e-05	3.6626e-05	1.6226e-05
A411	0.000151839	0.000175112	4.07e-05	9.36e-05	0.000151045	0.000122459		0.000101436	0.000172617	0.000160796	0.000270657	0.000201282	0.000110631	0.000120963	0.000162262	0.000181475	9.08e-05	0.000112071	0.000221435	7.05e-05	0.000134012	0.000131973	0.000152345		A411	0	5.01577e-05	3.83368e-05	0.000148197	7.88228e-05	0	0	3.98028e-05	5.90158e-05	0	0	9.89758e-05	0	1.15528e-05	9.51385e-06	2.98858e-05
T411	7.08581e-05	0.000109445	0.000112019	0.000166429	5.03e-05	0.00010181		8.11491e-05	8.12315e-05	0.000130647	5.41313e-05	5.03e-05	4.02e-05	6.72e-05	8.11e-05	4.84e-05	9.08e-05	0.000152824	6.04e-05	6.05e-05	3.09e-05	7.11e-05	0.000111719		T411	0	0	2.88368e-05	0	0	0	0	0	0	0	5.10138e-05	0	0	0	0	9.90878e-06
C411	1.01226e-05	1.09e-05	0.00020367	0	0	4.49385e-05		2.02873e-05	1.01539e-05	0	0	0	3.02e-05	0	1.01e-05	1.21e-05	3.03e-05	0	2.01e-05	1.01e-05	2.06e-05	2.03e-05	4.06e-05		C411	0	0	0	0	0	0	0	0	0	0	0	0	0	0	0	0
T412	0.000101133	9.84e-05	2.01e-05	6.23e-05	0.000161553	8.86971e-05		6.07521e-05	0.00013158	0.000141031	6.49555e-05	8.09e-05	0.000100671	6.72e-05	0.000101417	8.48e-05	8.1e-05	0.000152599	0.000121485	6.07e-05	0.000216586	9.14e-05	0.000172668		T412	0	4.28831e-05	5.23339e-05	0	0	1.19739e-05	0	1.27199e-05	0	0	6.39019e-05	3.27879e-05	0	0.000127889	2.70286e-06	8.39709e-05
G412	0.000232605	5.47e-05	7.05e-05	7.27e-05	0.000141358	0.000114373		0.000293635	0.0005162	0.000433166	0.000357255	0.000181923	0.000473156	0.00032255	0.000263684	0.000351481	0.000242979	0.000264505	0.000212598	0.000323995	0.000381605	0.000243833	0.000274237		G412	0.000179263	0.000401827	0.000318793	0.000242882	6.75504e-05	0.000358783	0.000208177	0.000149311	0.000237108	0.000128606	0.000150132	9.82254e-05	0.000209622	0.000267232	0.00012946	0.000159864
C412	8.09061e-05	6.56e-05	0.000181252	8.31e-05	8.08e-05	9.83316e-05		6.07521e-05	0.000121459	0.000130957	2.16518e-05	9.1e-05	6.04e-05	6.72e-05	0.000131842	9.7e-05	0.000121489	0.000223812	0.000131608	0.000101248	8.25e-05	9.14e-05	7.11e-05		C412	0	2.31271e-05	3.26254e-05	0	0	0	0	3.35104e-05	0	2.31574e-05	0.00012548	3.32764e-05	2.91637e-06	0	0	0
A413	5.03347e-05	8.71e-05	2.01e-05	3.1e-05	4.03e-05	4.57669e-05		8.05672e-05	1.00619e-05	3.01e-05	8.62273e-05	7.04e-05	2.01e-05	4.02e-05	7.06e-05	6.03e-05	6.05e-05	3.06e-05	8.08e-05	6.07e-05	6.17e-05	8.16e-05	4.05e-05		A413	3.48002e-05	0	0	4.04604e-05	2.46331e-05	0	0	2.48331e-05	1.45331e-05	1.47331e-05	0	3.50331e-05	1.49331e-05	1.59331e-05	3.58331e-05	0
G413	3.02008e-05	2.18e-05	2.01e-05	3.1e-05	2.01e-05	2.46402e-05		2.01418e-05	1.00619e-05	1e-05	1.07784e-05	0	1e-05	4.02e-05	3.02e-05	3.62e-05	1.01e-05	1.02e-05	1.01e-05	1.01e-05	5.15e-05	1.02e-05	2.03e-05		G413	0	0	0	0	0	0	1.55598e-05	5.55983e-06	1.15598e-05	0	0	0	0	2.68598e-05	0	0
C413	0.000140937	0.000196085	3.02e-05	8.28e-05	0.000140896	0.000118184		0.000322269	0.000251547	0.000200733	0.000398801	0.000331722	0.000210824	0.000334735	0.000211747	0.000229131	0.000292233	0.000254616	0.000282908	0.00019209	0.000226384	0.000122365	0.000192559		C413	0.000204085	0.000133363	8.25494e-05	0.000280618	0.000213538	9.26404e-05	0.000216551	9.35634e-05	0.000110947	0.000174049	0.000136432	0.000164724	7.39064e-05	0.0001082	4.18135e-06	7.43754e-05
A414	6.05156e-05	9.84e-05	3.01e-05	0.000114548	4.04e-05	6.87927e-05		0.000161443	0.000141328	0.000140995	6.48698e-05	0.000151491	0.000201694	8.06e-05	9.1e-05	7.28e-05	0.000202947	0.000122898	0.000142249	8.14e-05	0.000113633	0.000133306	7.13e-05		A414	9.26506e-05	7.25358e-05	7.22023e-05	0	8.26983e-05	0.000132901	1.18073e-05	2.22073e-05	4.00728e-06	0.000134154	5.41053e-05	7.34563e-05	1.26073e-05	4.48403e-05	6.45133e-05	2.50728e-06
T414	5.04297e-05	4.37e-05	0.000180875	0.000124961	8.09e-05	9.61731e-05		0.000110992	0.000141328	0	5.40581e-05	4.04e-05	1.01e-05	6.71e-05	9.1e-05	7.28e-05	0.000121768	8.19e-05	4.06e-05	6.1e-05	9.3e-05	0.000123052	4.07e-05		T414	1.48191e-05	4.51554e-05	0	0	0	0	0	0	0	2.55949e-05	0	0	0	0	2.68789e-05	0
C414	0	4.37e-05	2.01e-05	0	2.02e-05	1.68e-05		6.05412e-05	2.01898e-05	0	6.48698e-05	1.01e-05	4.03e-05	4.03e-05	1.01e-05	2.43e-05	2.03e-05	3.07e-05	4.06e-05	4.07e-05	4.13e-05	3.08e-05	5.09e-05		C414	4.37412e-05	3.38978e-06	0	4.80698e-05	0	2.35e-05	2.35e-05	0	7.5e-06	3.5e-06	1.39e-05	2.38e-05	2.39e-05	2.45e-05	1.4e-05	3.41e-05
T415	7.08244e-05	5.46e-05	0.000171371	6.23e-05	0.000121257	9.60705e-05		5.06606e-05	6.07447e-05	0.000110773	5.40208e-05	0.00012145	7.05e-05	1.34e-05	8.12e-05	0.000121319	5.07e-05	9.31e-05	7.16e-05	9.23e-05	8.28e-05	5.18e-05	0.000112077		T415	0	0	1.47025e-05	0	2.53795e-05	0	0	0	2.52485e-05	0	0	0	0	0	0	1.60065e-05
G415	6.07066e-05	0.000218324	8.06e-05	8.3e-05	8.08e-05	0.000104686		0.000111453	0.000232855	0.000181265	0.000205279	0.000172054	0.00024159	0.000147542	0.000121866	0.000181979	0.000101489	0.000196449	0.000204648	0.000205038	0.000217333	0.000227727	0.000152832		G415	6.76723e-06	0.000128169	7.65789e-05	0.000100593	6.73679e-05	0.000136904	4.28559e-05	1.71799e-05	7.72929e-05	0	9.17629e-05	9.99619e-05	0.000100352	0.000112647	0.000123041	4.81459e-05
C415	5.05889e-05	3.27e-05	2.02e-05	9.34e-05	6.06e-05	5.14978e-05		7.09249e-05	4.04965e-05	4.03e-05	6.48249e-05	0.000101208	4.03e-05	4.02e-05	0.000101555	0.000157715	0.000142084	8.27e-05	0.000153486	0.000153778	6.21e-05	6.21e-05	0.000101888		C415	1.94271e-05	0	0	1.33271e-05	4.97102e-05	0	0	5.00572e-05	0.000106217	9.05862e-05	3.12022e-05	0.000101988	0.00010228	1.06022e-05	1.06022e-05	5.03902e-05
A416	0	2.18e-05	0.000171641	6.2e-05	5.04e-05	6.11682e-05		4.04633e-05	2.02239e-05	1e-05	2.15452e-05	1.01e-05	4.02e-05	1.34e-05	6.07e-05	3.62e-05	5.05e-05	5.08e-05	2.03e-05	5.08e-05	1.03e-05	5.06e-05	3.05e-05		A416	0	0	0	0	0	0	0	0	0	0	0	0	0	0	0	0
T416	8.08604e-05	3.27e-05	0.000151448	0.000103403	7.05e-05	8.77823e-05		0.000182085	0.000161791	0.000231021	0.000161589	6.03e-05	0.000110522	4.01e-05	0.000101186	6.03e-05	0.000141296	0.000111719	8.11e-05	9.14e-05	5.16e-05	5.06e-05	7.12e-05		T416	9.43026e-05	7.40088e-05	0.000143239	7.38069e-05	0	2.27397e-05	0	1.34037e-05	0	5.35137e-05	2.39367e-05	0	3.61773e-06	0	0	0
G416	0	1.09e-05	6.06e-05	0	0	1.43e-05		3.03475e-05	0	0	0	2.01e-05	0	0	0	0	0	2.03e-05	3.04e-05	3.05e-05	2.06e-05	0	2.03e-05		G416	1.60475e-05	0	0	0	5.8e-06	0	0	0	0	0	6e-06	1.61e-05	1.62e-05	6.3e-06	0	6e-06
A417	4.1121e-05	0.000109102	4.02e-05	5.19e-05	2.02e-05	5.25046e-05		3.07907e-05	5.14493e-05	5.04e-05	0.000118756	3.03e-05	4.03e-05	4.03e-05	1.03e-05	9.68e-05	5.07e-05	9.3e-05	6.11e-05	8.17e-05	9.31e-05	2.06e-05	0		A417	0	0	0	6.62513e-05	0	0	0	0	4.42954e-05	0	4.04954e-05	8.59541e-06	2.91954e-05	4.05954e-05	0	0
G417	4.1121e-05	0.000120013	0.000241044	0.0001349	0.000121308	0.000131677		9.23721e-05	2.05797e-05	5.04e-05	6.47759e-05	4.04e-05	3.02e-05	6.71e-05	2.06e-05	0.00012096	6.08e-05	5.17e-05	1.02e-05	1.02e-05	9.31e-05	6.18e-05	9.17e-05		G417	0	0	0	0	0	0	0	0	0	0	0	0	0	0	0	0
C417	0.000267286	0.000360038	3.01e-05	0.000280176	0.000202179	0.000227956		0.000153954	0.000277826	9.06e-05	0.000367064	0.000262412	0.00026201	0.000241543	0.000113261	0.000133056	0.000202704	0.000175665	0.000224192	0.000132799	0.000269065	0.000205918	0.000173293		C417	0	4.98705e-05	0	0.000139108	3.44562e-05	3.40542e-05	1.35872e-05	0	0	0	0	0	0	4.11092e-05	0	0
A418	9.06911e-05	6.5e-05	0.000292454	6.2e-05	4.04e-05	0.000110109		4.03832e-05	4.03246e-05	8.05e-05	8.58756e-05	3.03e-05	4.03e-05	2.67e-05	4.04e-05	7.19e-05	0.000101186	5.08e-05	2.02e-05	3.03e-05	6.16e-05	4.07e-05	3.05e-05		A418	0	0	0	0	0	0	0	0	0	0	0	0	0	0	0	0
G418	8.06143e-05	6.5e-05	5.04e-05	0.0001034	0.000101029	8.00887e-05		6.05749e-05	6.04869e-05	6.04e-05	7.51412e-05	7.06e-05	5.03e-05	6.67e-05	7.07e-05	0.000131907	0.000121423	6.1e-05	6.07e-05	9.1e-05	5.14e-05	0.000101711	4.06e-05		G418	0	0	0	0	0	0	0	0	5.18183e-05	4.13343e-05	0	0	1.09113e-05	0	2.16223e-05	0
C418	0.000130998	5.42e-05	0	1.03e-05	0.000101029	5.93054e-05		0.000131246	0.000181461	6.04e-05	0.000225423	0.00016139	0.000140902	0.000133353	0.000211963	0.000131907	0.000202372	0.000101684	0.000161907	0.000192034	0.00014381	0.000203422	0.000132027		C418	7.19401e-05	0.000122155	1.09456e-06	0.000166118	0.000102085	8.15966e-05	7.40476e-05	0.000152658	7.26016e-05	0.000143067	4.23786e-05	0.000102602	0.000132729	8.45046e-05	0.000144117	7.27216e-05
A419	2.0312e-05	2.16e-05	9.08e-05	1.03e-05	0	2.86024e-05		5.08487e-05	6.09106e-05	1.01e-05	5.35166e-05	7.05e-05	2.01e-05	3.99e-05	1.02e-05	1.2e-05	3.03e-05	3.05e-05	0	1.01e-05	1.02e-05	2.03e-05	4.05e-05		A419	2.22463e-05	3.23082e-05	0	2.49142e-05	4.18976e-05	0	1.12976e-05	0	0	1.6976e-06	1.8976e-06	0	0	0	0	1.18976e-05
G419	6.0936e-05	2.16e-05	8.07e-05	1.03e-05	0	3.47072e-05		3.05092e-05	0	2.01e-05	1.07033e-05	0	4.02e-05	1.33e-05	6.1e-05	3.59e-05	3.03e-05	2.03e-05	0	1.01e-05	0	6.09e-05	1.01e-05		G419	0	0	0	0	0	5.4928e-06	0	2.62928e-05	1.1928e-06	0	0	0	0	0	2.61928e-05	0
C419	0.00010156	0.000118835	2.02e-05	7.21e-05	0.000141074	9.07538e-05		0.000142376	0.000335008	0.000170928	0.000149846	0.000201544	0.000331622	0.000172898	0.000172701	0.000155601	0.00016157	0.000121957	0.000161716	0.000201751	0.000122884	0.000253918	0.000232973		C419	5.16225e-05	0.000244255	8.01742e-05	5.90926e-05	0.00011079	0.000240868	8.21442e-05	8.19472e-05	6.48472e-05	7.08162e-05	3.12032e-05	7.09622e-05	0.000110997	3.21302e-05	0.000163164	0.000142219
T420	3.04223e-05	6.49e-05	0.000191851	5.17e-05	6.07e-05	7.99147e-05		0.000132671	0.000172733	0.000171133	0.000117854	9.09e-05	0.00017115	0.000199829	0.000142265	8.4e-05	5.07e-05	8.33e-05	8.17e-05	0.000173537	0.000123618	0.000146503	0.000142634		T420	5.2756e-05	9.2818e-05	9.12183e-05	3.79391e-05	1.09853e-05	9.12353e-05	0.000119914	6.23503e-05	4.08535e-06	0	3.38535e-06	1.78535e-06	9.36223e-05	4.37033e-05	6.65883e-05	6.27193e-05
G420	0.000162252	0.000259476	0.000141364	7.23e-05	0.000161749	0.000159428		0.000316368	0.000335305	0.000473132	0.00021428	0.000272832	0.00013088	0.000266439	0.0003455	0.000107998	0.00027372	0.000281165	0.000214356	0.000173537	0.000226634	0.000293007	0.000183387		G420	0.00015694	0.000175876	0.000313704	5.48514e-05	0.000113404	0	0.000107011	0.000186072	0	0.000114292	0.000121737	5.49278e-05	1.41088e-05	6.72058e-05	0.000133579	2.39588e-05
C420	4.0563e-05	4.32e-05	1.01e-05	9.3e-05	8.09e-05	5.35526e-05		7.1438e-05	3.04822e-05	7.05e-05	6.42839e-05	7.07e-05	9.06e-05	2.66e-05	3.05e-05	7.2e-05	6.08e-05	6.25e-05	0.000173526	6.12e-05	5.15e-05	1.05e-05	6.11e-05		C420	1.78854e-05	0	1.69474e-05	1.07313e-05	1.71474e-05	3.70474e-05	0	0	1.84474e-05	7.2474e-06	8.9474e-06	0.000119973	7.6474e-06	0	0	7.5474e-06
A421	0.000123145	0.000194951	3.02e-05	7.25e-05	0.00012152	0.000108463		0.000174973	0.000143341	4.04e-05	0.000107335	0.000172564	7.07e-05	0	0.000153704	7.22e-05	4.07e-05	9.57e-05	6.18e-05	0.000144229	0.000103541	0.000139377	0.000102499		A421	6.65095e-05	3.48781e-05	0	0	6.41008e-05	0	0	4.52408e-05	0	0	0	0	3.57658e-05	0	3.09138e-05	0
T421	9.23588e-05	8.66e-05	8.06e-05	0.000144935	0.000111394	0.000103178		0.000113218	0.000102387	3.03e-05	0.000107335	2.03e-05	4.04e-05	5.34e-05	5.12e-05	8.42e-05	9.15e-05	9.57e-05	5.15e-05	4.12e-05	4.14e-05	0.000107213	9.22e-05		T421	1.00401e-05	0	0	4.15773e-06	0	0	0	0	0	0	0	0	0	0	4.03543e-06	0
C421	1.02621e-05	1.08e-05	5.04e-05	3.11e-05	4.05e-05	2.86124e-05		1.02925e-05	1.02387e-05	6.05e-05	0	2.03e-05	3.03e-05	2.67e-05	1.02e-05	0	0	0	2.06e-05	1.03e-05	0	2.14e-05	0		C421	0	0	3.18876e-05	0	0	1.68758e-06	0	0	0	0	0	0	0	0	0	0
A422	7.19395e-05	6.51e-05	0.000110869	7.27e-05	5.07e-05	7.42617e-05		6.19873e-05	6.15764e-05	6.06e-05	9.67856e-05	3.05e-05	3.04e-05	4.01e-05	9.24e-05	4.82e-05	2.04e-05	3.2e-05	0.000103092	3.1e-05	5.19e-05	7.53e-05	2.05e-05		A422	0	0	0	2.25239e-05	0	0	0	1.81383e-05	0	0	0	2.88303e-05	0	0	1.0383e-06	0
T422	0.000113048	0.000151875	0.000141106	0.000114207	0.000101422	0.000124332		0.000134306	0.000205255	6.06e-05	4.30158e-05	9.16e-05	3.04e-05	4.01e-05	0.000133441	0.000108516	0.000122206	9.6e-05	0.000113401	9.29e-05	5.19e-05	0.000161299	5.14e-05		T422	9.97429e-06	8.0923e-05	0	0	0	0	0	9.10945e-06	0	0	0	0	0	0	3.69674e-05	0
C422	1.02771e-05	0	0	0	0	2.05541e-06		3.09937e-05	2.05255e-05	1.01e-05	0	2.03e-05	2.02e-05	2.67e-05	1.03e-05	0	2.04e-05	2.13e-05	1.03e-05	6.19e-05	0	2.15e-05	2.05e-05		C422	2.89382e-05	1.847e-05	8.04459e-06	0	1.82446e-05	1.81446e-05	2.46446e-05	8.24459e-06	0	1.83446e-05	1.92446e-05	8.24459e-06	5.98446e-05	0	1.94446e-05	1.84446e-05
T423	0.000121389	0.00017298	0.000141242	0.000134863	0.000131706	0.000140436		0.000203116	0.000151742	0.000191596	7.49593e-05	0.000111774	0.000191737	6.65e-05	0.000141948	0.000192922	0.000132338	0.000136	0.000144273	4.13e-05	0.000165489	0.000157489	0.000102497		T423	6.26799e-05	1.13061e-05	5.11601e-05	0	0	5.13011e-05	0	1.51206e-06	5.24861e-05	0	0	3.83706e-06	0	2.50531e-05	1.70531e-05	0
G423	0.00021243	0.000108113	0.000171508	0.000186734	0.000182362	0.000172229		0.000264051	0.000252903	0.000282352	0.000289129	0.000345483	0.000232103	0.000226145	0.000283895	0.00025321	0.000183238	0.000209231	0.000103052	0.000248031	0.000227548	0.000220484	0.000215243		G423	9.18211e-05	8.06739e-05	0.000110123	0.000116899	0.000173254	5.98736e-05	5.39156e-05	0.000111666	8.09806e-05	1.10086e-05	3.70016e-05	0	7.58016e-05	5.53186e-05	4.82546e-05	4.30136e-05
C423	5.05786e-05	2.16e-05	2.02e-05	5.19e-05	8.1e-05	4.50557e-05		8.12463e-05	2.02323e-05	1.01e-05	0	6.1e-05	6.05e-05	3.99e-05	9.13e-05	2.41e-05	5.09e-05	0.000115077	4.12e-05	0.000124016	1.03e-05	5.25e-05	1.02e-05		C423	3.61906e-05	0	0	0	1.59443e-05	1.54443e-05	0	4.62443e-05	0	5.84428e-06	7.00213e-05	0	7.89603e-05	0	7.44428e-06	0
A424	9.27261e-05	9.72e-05	9.07e-05	5.19e-05	4.05e-05	7.46052e-05		0.000144209	0.000102845	4.04e-05	8.55679e-05	7.14e-05	2.02e-05	0.000146176	0.000102844	0.000132597	0.000112219	6.25e-05	6.19e-05	9.29e-05	6.19e-05	5.22e-05	8.18e-05		A424	6.96042e-05	2.82395e-05	0	1.09627e-05	0	0	7.15708e-05	2.82388e-05	5.79918e-05	3.76138e-05	0	0	1.82948e-05	0	0	7.19477e-06
G424	2.06058e-05	1.08e-05	0.000110822	4.15e-05	2.02e-05	4.07856e-05		4.12027e-05	4.11379e-05	0	4.2784e-05	3.06e-05	0	5.32e-05	4.11e-05	4.82e-05	2.04e-05	6.25e-05	1.03e-05	2.06e-05	3.1e-05	3.13e-05	2.04e-05		G424	4.17145e-07	3.52311e-07	0	1.99839e-06	0	0	1.24144e-05	3.14438e-07	7.41444e-06	0	2.17144e-05	0	0	0	0	0
C424	5.15145e-05	0.000129566	2.01e-05	0.000166163	0.000131556	9.97799e-05		0.000257517	0.000143983	0.000222148	0.000417144	0.000397533	0.000212001	0.000358794	0.000246825	0.000277249	0.000193832	0.000208407	0.00032988	0.0003819	0.000330162	0.000104383	0.000367982		C424	0.000157737	4.42027e-05	0.000122368	0.000317364	0.000297753	0.000112221	0.000259014	0.000147045	0.000177469	9.40521e-05	0.000108627	0.0002301	0.00028212	0.000230382	4.60309e-06	0.000268202
T425	3.16022e-05	3.24e-05	8.04e-05	1.04e-05	0	3.09604e-05		2.1038e-05	6.29393e-05	4.05e-05	6.43011e-05	2.05e-05	7.09e-05	5.33e-05	2.11e-05	7.25e-05	0	2.17e-05	2.08e-05	1.05e-05	5.2e-05	6.63e-05	1.03e-05		T425	0	3.19788e-05	9.53955e-06	3.33407e-05	0	3.99396e-05	2.23396e-05	0	4.15396e-05	0	0	0	0	2.10396e-05	3.53396e-05	0
G425	0.000126409	0.000118897	0.000180865	0.000228216	0.000202821	0.000171442		0.000252456	0.000241267	0.000455618	0.000225054	0.000337928	0.000182354	0.000279743	0.000243191	0.000229627	0.000163596	0.000173989	0.00017708	0.00019867	0.000290933	0.000221016	0.000206256		G425	8.10146e-05	6.98256e-05	0.000284176	5.36123e-05	0.000166486	1.09124e-05	0.000108301	7.17494e-05	5.81854e-05	0	2.54741e-06	5.63841e-06	2.72284e-05	0.000119491	4.95744e-05	3.48144e-05
C425	2.10682e-05	0.000162132	0.000160768	0.000248963	0.000263668	0.00017132		8.41521e-05	3.14696e-05	0.000151873	0.00017147	0.000276486	0.000283662	0.000213137	5.29e-05	0.000253798	0.000276068	2.17e-05	0.000197913	0.000219583	8.31e-05	6.63e-05	0.000195943		C425	0	0	0	1.49771e-07	0.000105166	0.000112342	4.18172e-05	0	8.24782e-05	0.000104748	0	2.65932e-05	4.82632e-05	0	0	2.46232e-05
T426	7.44443e-05	4.33e-05	0.00018095	3.12e-05	8.14e-05	8.22589e-05		3.20352e-05	0.00010635	0.000142094	1.07508e-05	9.27e-05	7.13e-05	0.000106862	0.000128619	9.72e-05	3.09e-05	7.66e-05	0.000115003	5.25e-05	6.25e-05	5.57e-05	7.24e-05		T426	0	2.40913e-05	5.98351e-05	0	1.04411e-05	0	2.46031e-05	4.63601e-05	1.49411e-05	0	0	3.27441e-05	0	0	0	0
G426	0.000116984	8.66e-05	6.03e-05	0.000104116	8.14e-05	8.988e-05		0.00026696	0.000372226	0.000223291	0.000247269	0.000288321	0.000173044	0.000200366	0.000235801	0.000218752	8.23e-05	0.000295495	0.000282279	0.000241406	0.000208329	0.000178239	8.27e-05		G426	0.00017708	0.000282346	0.000133411	0.000157389	0.000198441	8.3164e-05	0.000110486	0.000145921	0.000128872	0	0.000205615	0.000192399	0.000151526	0.000118449	8.8359e-05	0
C426	5.31745e-05	6.5e-05	1.01e-05	0.000156174	9.16e-05	7.52097e-05		0.000117462	4.25401e-05	5.07e-05	5.37542e-05	0.000133863	5.09e-05	5.34e-05	1.07e-05	9.72e-05	0.000133704	5.47e-05	0.000115003	0.000220415	5.21e-05	4.46e-05	5.17e-05		C426	4.22527e-05	0	0	0	5.86533e-05	0	0	0	2.19903e-05	5.84943e-05	0	3.97933e-05	0.000145205	0	0	0
T427	7.88475e-05	6.54e-05	6.03e-05	0.000126078	9.24e-05	8.46051e-05		7.91739e-05	5.61186e-05	0.000174495	0.000173449	9.45e-05	0.000133688	0.000121047	0.000135707	7.37e-05	6.26e-05	0.000156675	0.000126429	4.24e-05	0.000177945	0.000148437	6.24e-05		T427	0	0	8.98899e-05	8.88442e-05	9.8949e-06	4.90829e-05	3.64419e-05	5.11019e-05	0	0	7.20699e-05	4.18239e-05	0	9.33399e-05	6.38319e-05	0
G427	0.000135167	0.000228935	7.04e-05	0.000220637	0.000102638	0.000151555		0.000361938	0.000370383	0.000184759	0.000314377	0.00028339	0.000267377	0.000228645	0.000158324	0.000147424	4.17e-05	0.000156675	0.000284465	0.000148434	0.000230282	0.000125601	0.0002599		G427	0.000210382	0.000218827	3.32036e-05	0.000162821	0.000131835	0.000115822	7.70896e-05	6.76858e-06	0	0	5.11958e-06	0.00013291	0	7.87266e-05	0	0.000108345
C427	4.50557e-05	0.000174427	0	0.000157598	9.24e-05	9.38961e-05		0.000124416	7.85661e-05	0.000143702	0.000173449	0.000325374	0.000143972	8.07e-05	7.92e-05	0.000122853	0.000166905	0.00010072	0.000105357	0.000275663	6.28e-05	7.99e-05	0.000124752		C427	3.052e-05	0	4.98059e-05	7.95531e-05	0.000231478	5.00759e-05	0	0	2.89569e-05	7.30089e-05	6.82386e-06	1.14609e-05	0.000181767	0	0	3.08559e-05
A428	0.000133903	6.52e-05	0.000111213	2.1e-05	5.12e-05	7.65032e-05		0.000191091	0.000111571	0.000112556	3.24401e-05	0.000156517	0.000164131	6.71e-05	0.000123526	0.000110318	0.000103831	0.000111474	9.44e-05	8.43e-05	6.27e-05	0.000147473	2.07e-05		A428	0.000114587	3.50678e-05	3.60528e-05	0	8.00138e-05	8.76278e-05	0	4.70228e-05	3.38148e-05	2.73278e-05	3.49708e-05	1.78968e-05	7.79677e-06	0	7.09698e-05	0
G428	2.23172e-05	5.44e-05	0.000131434	4.19e-05	4.09e-05	5.81902e-05		2.24813e-05	4.46284e-05	1.02e-05	4.32535e-05	2.09e-05	5.13e-05	1.34e-05	0	3.68e-05	5.19e-05	4.46e-05	3.15e-05	1.05e-05	4.18e-05	1.13e-05	5.18e-05		G428	0	0	0	0	0	0	0	0	0	0	0	0	0	0	0	0
C428	6.69516e-05	9.79e-05	9.1e-05	2.1e-05	4.09e-05	6.35503e-05		0.00017985	0.000223142	0.000337668	0.000313588	0.000187821	0.000194906	0.000134273	0.000145985	0.000183864	0.000207663	0.000211801	6.29e-05	0.00020019	6.27e-05	9.08e-05	0.000124437		C428	0.0001163	0.000159592	0.000274118	0.000250038	0.000124271	0.000131356	7.07227e-05	8.24347e-05	0.000120314	0.000144113	0.000148251	0	0.00013664	0	2.72497e-05	6.08867e-05
A429	5.7167e-05	0	6.04e-05	5.25e-05	0	3.40134e-05		0	2.28438e-05	1.03e-05	3.24458e-05	0	1.03e-05	0	0	0	0	2.24e-05	0	7.38e-05	0	5.7e-05	6.22e-05		A429	0	0	0	0	0	0	0	0	0	0	0	0	3.97866e-05	0	2.29866e-05	2.81866e-05
G429	5.7167e-05	2.18e-05	0	4.2e-05	3.08e-05	3.03534e-05		2.29967e-05	4.56877e-05	2.05e-05	2.16305e-05	0	2.05e-05	2.68e-05	0	3.68e-05	1.04e-05	1.12e-05	4.2e-05	1.05e-05	6.27e-05	5.7e-05	1.04e-05		G429	0	1.53343e-05	0	0	0	0	0	0	6.44659e-06	0	0	1.16466e-05	0	3.23466e-05	2.66466e-05	0
C429	8.00338e-05	0.000141446	0.000110655	0.000115568	9.23e-05	0.000108001		0.000172475	0.000125641	0.000153778	0.000151414	0.000303891	0.000297754	0.000254917	0.000249923	0.000110509	0.000166604	0.000190323	0.000178444	0.000263466	0.000198406	0.000239245	0.000134769		C429	6.44747e-05	1.76405e-05	4.57774e-05	4.3413e-05	0.00019589	0.000189753	0.000146916	0.000141922	2.50843e-06	5.86034e-05	8.23224e-05	7.04434e-05	0.000155465	9.04054e-05	0.000131244	2.67684e-05
T430	4.26139e-05	6.42e-05	7.08e-05	3.11e-05	5.06e-05	5.18628e-05		9.79336e-05	3.22508e-05	4.04e-05	0.000106606	4.12e-05	7.09e-05	7.93e-05	8.59e-05	6.06e-05	6.18e-05	8.53e-05	1.03e-05	7.25e-05	5.15e-05	5.38e-05	3.07e-05		T430	4.60708e-05	0	0	5.47436e-05	0	1.90372e-05	2.74372e-05	3.40372e-05	8.73721e-06	9.93721e-06	3.34372e-05	0	2.06372e-05	0	1.93721e-06	0
G430	0.000223723	0.000588789	3.03e-05	0.000415274	0.000414552	0.000334528		0.000152341	0.000301007	0.000444759	0.000533032	0.000371084	0.000435289	0.000700141	0.00020404	0.000315366	0.000216145	0.000277082	0.000330432	0.000424862	0.000422045	0.000150502	0.00035813		G430	0	0	0.000110231	0.000198504	3.65564e-05	0.000100761	0.000365613	0	0	0	0	0	9.03344e-05	8.75174e-05	0	2.36024e-05
C430	3.19605e-05	3.21e-05	0	4.15e-05	8.09e-05	3.72921e-05		8.70521e-05	5.37513e-05	7.08e-05	3.19819e-05	6.18e-05	0.000141722	6.61e-05	4.3e-05	6.06e-05	8.23e-05	2.13e-05	6.2e-05	2.07e-05	6.18e-05	5.38e-05	6.14e-05		C430	4.976e-05	1.64592e-05	3.35079e-05	0	2.45079e-05	0.00010443	2.88079e-05	5.70791e-06	2.33079e-05	4.50079e-05	0	2.47079e-05	0	2.45079e-05	1.65079e-05	2.41079e-05
A431	0.000132117	8.5e-05	8.1e-05	0.000176005	0.000121496	0.000119124		0.00014708	4.12205e-05	6.05e-05	9.54077e-05	8.18e-05	0.000161737	0.000157404	8.23e-05	0.000205707	8.2e-05	0.000154564	0.000123187	0.000133709	0.000133159	0.00010295	0.000101699		A431	2.7957e-05	0	0	0	0	4.26135e-05	3.82805e-05	0	8.65835e-05	0	3.54405e-05	4.0635e-06	1.45855e-05	1.40355e-05	0	0
G431	4.06512e-05	0.000116835	0.000111405	0.000196712	9.11e-05	0.000111341		2.10115e-05	9.27462e-05	3.03e-05	4.24034e-05	0.000132994	0.000131411	0.000144287	7.2e-05	0.000169405	0.000112794	6.18e-05	0.000123187	0.000133709	0.00010243	0.000113244	0.000152549		G431	0	0	0	0	2.16534e-05	2.00704e-05	3.29464e-05	0	5.80644e-05	1.45335e-06	0	1.18464e-05	2.23684e-05	0	1.90335e-06	4.12084e-05
C431	0.000121954	0.000127456	0.00013166	0.000103533	5.06e-05	0.000107041		0.000231126	0.000309154	0.000252281	0.000402833	0.000163685	0.0003538	0.000288574	0.000360049	0.000145205	6.15e-05	0.000133956	0.000225843	0.000164565	0.00010243	0.000123539	0.000152549		C431	0.000124086	0.000202114	0.00014524	0.000295792	5.66445e-05	0.000246759	0.000181533	0.000253008	3.81645e-05	0	2.69155e-05	0.000118802	5.75245e-05	0	1.64985e-05	4.55085e-05
A432	3.04476e-05	2.12e-05	4.02e-05	3.09e-05	6.04e-05	3.66295e-05		3.15093e-05	8.24334e-05	1.01e-05	2.11396e-05	3.05e-05	1.01e-05	2.61e-05	4.11e-05	3.61e-05	1.02e-05	5.14e-05	1.02e-05	6.14e-05	3.06e-05	4.1e-05	1.01e-05		A432	0	4.58039e-05	0	0	0	0	0	4.47048e-06	0	0	1.47705e-05	0	2.47705e-05	0	4.37048e-06	0
T432	5.0746e-05	9.52e-05	2.01e-05	3.09e-05	9.06e-05	5.75092e-05		5.25155e-05	7.21293e-05	9.05e-05	5.28491e-05	2.04e-05	3.02e-05	5.23e-05	4.11e-05	6.02e-05	3.06e-05	0.000102796	0	2.05e-05	6.12e-05	2.05e-05	2.02e-05		T432	0	1.46201e-05	3.29908e-05	0	0	0	0	0	2.69081e-06	0	4.52868e-05	0	0	3.69081e-06	0	0
G432	1.01492e-05	1.06e-05	1.01e-05	1.03e-05	3.02e-05	1.42698e-05		1.05031e-05	0	1.01e-05	0	0	0	2.61e-05	0	4.81e-05	0	0	5.1e-05	2.05e-05	2.04e-05	0	2.02e-05		G432	0	0	0	0	0	0	1.18302e-05	0	3.38302e-05	0	0	3.67302e-05	6.23016e-06	6.13016e-06	0	5.93016e-06
A433	6.04339e-05	0.000105265	8.08e-05	5.12e-05	6.04e-05	7.16198e-05		7.1978e-05	0.000100991	0.000170954	9.47378e-05	7.1e-05	9.05e-05	2.6e-05	6.06e-05	5.99e-05	9.13e-05	5.05e-05	0.00012174	4.07e-05	3.05e-05	0.000151332	8.07e-05		A433	3.58171e-07	2.93709e-05	9.93342e-05	2.31181e-05	0	1.88802e-05	0	0	0	1.96802e-05	0	5.01202e-05	0	0	7.97122e-05	9.08022e-06
G433	5.03616e-05	3.16e-05	5.05e-05	0.000122958	7.05e-05	6.51839e-05		4.11303e-05	6.05944e-05	2.01e-05	3.15793e-05	3.04e-05	4.02e-05	1.3e-05	6.06e-05	7.19e-05	0.000101469	5.05e-05	6.09e-05	5.08e-05	0.000101583	6.05e-05	4.04e-05		G433	0	0	0	0	0	0	0	0	6.71608e-06	3.62851e-05	0	0	0	3.63991e-05	0	0
C433	0.000181302	0.000200004	0.000181704	0.000102465	0.000271849	0.000187465		0.000329042	0.000353468	0.000191066	0.000347372	0.000293989	0.000181079	0.000247264	0.000211971	0.000191789	0.000152204	0.000303211	0.000182609	0.000233778	0.000335223	0.000312752	0.000181596		C433	0.000141577	0.000166003	3.60125e-06	0.000159907	0.000106524	0	5.97993e-05	2.45063e-05	4.32425e-06	0	0.000115746	0	4.63133e-05	0.000147758	0.000125287	0
A434	0.000131305	0.000168101	6.05e-05	0.000132789	0.000110537	0.000120646		0.000123416	0.000101094	9.03e-05	0.000168111	8.09e-05	0.000210951	9.09e-05	0.000121341	0.000179389	6.07e-05	0.000141736	0.000131523	6.08e-05	6.08e-05	0.000232365	7.05e-05		A434	2.76972e-06	0	0	4.74649e-05	0	9.03046e-05	0	6.94565e-07	5.87426e-05	0	2.10896e-05	1.08766e-05	0	0	0.000111719	0
G434	1.01004e-05	0	1.01e-05	4.09e-05	0	1.22201e-05		1.02847e-05	0	3.01e-05	2.10139e-05	4.04e-05	1e-05	5.19e-05	2.02e-05	1.2e-05	3.04e-05	2.02e-05	1.01e-05	4.06e-05	3.04e-05	2.02e-05	1.01e-05		G434	0	0	1.78799e-05	8.79384e-06	2.81799e-05	0	3.96799e-05	7.97992e-06	0	1.81799e-05	7.97992e-06	0	2.83799e-05	1.81799e-05	7.97992e-06	0
C434	0.000191908	0.000168101	0.000100892	0.000214505	9.04e-05	0.000153161		0.000205694	0.000283063	0.000270981	0.000157604	0.000232565	0.00015068	0.000259639	0.000192123	0.000227227	0.000192284	0.00015186	0.000182109	0.000212939	0.000131814	0.000242468	0.000161126		C434	5.25325e-05	0.000129902	0.00011782	4.4433e-06	7.94039e-05	0	0.000106478	3.89619e-05	7.40659e-05	3.91229e-05	0	2.89479e-05	5.97779e-05	0	8.93069e-05	7.96489e-06
T435	9.25155e-05	4.2e-05	5.05e-05	0.000102184	6.05e-05	6.95399e-05		7.28218e-05	3.0875e-05	0.000150913	3.15341e-05	9.11e-05	5.04e-05	6.49e-05	8.28e-05	3.59e-05	0.000101491	6.17e-05	6.08e-05	5.09e-05	7.1e-05	5.16e-05	5.04e-05		T435	3.28195e-06	0	8.13731e-05	0	2.15601e-05	0	0	1.32601e-05	0	3.19511e-05	0	0	0	1.4601e-06	0	0
G435	0.000236428	0.000209806	3.03e-05	0.000255459	0.000151257	0.00017665		0.000312094	0.0003705	0.000211278	0.000210228	0.000131652	0.000412986	0.000376232	0.000227574	0.000155664	0.000202982	0.000236701	0.000131806	0.000193274	0.000182565	0.000134239	0.000141098		G435	0.000135444	0.00019385	3.46279e-05	3.35775e-05	0	0.000236336	0.000199582	5.09239e-05	0	2.63319e-05	6.00509e-05	0	1.66239e-05	5.9149e-06	0	0
C435	3.08385e-05	0	0.000131195	0	2.02e-05	3.64467e-05		2.08062e-05	0	0	3.15341e-05	2.03e-05	4.03e-05	2.59e-05	1.03e-05	2.39e-05	2.03e-05	2.06e-05	2.03e-05	5.09e-05	3.04e-05	5.16e-05	2.02e-05		C435	0	0	0	0	0	3.8533e-06	0	0	0	0	0	0	1.44533e-05	0	1.51533e-05	0
T436	1.01637e-05	5.25e-05	4.05e-05	1.03e-05	1.01e-05	2.47127e-05		3.10498e-05	2.04384e-05	0	0	2.03e-05	1.01e-05	1.3e-05	3.11e-05	0	1.02e-05	3.09e-05	0	2.05e-05	1.02e-05	6.21e-05	0		T436	6.33705e-06	0	0	0	0	0	0	6.38725e-06	0	0	6.18725e-06	0	0	0	3.73873e-05	0
G436	0.000172784	8.4e-05	0.000161963	7.18e-05	0.000111109	0.000120331		0.000186299	0.000265699	0.000483544	0.000221248	0.000253926	0.000161567	0.000103983	0.000207288	0.00019256	0.000245033	0.000216633	0.000132431	0.000224993	0.000142313	0.000155291	0.000191975		G436	6.59677e-05	0.000145368	0.000363213	0.000100917	0.000133595	4.12359e-05	0	8.69569e-05	7.22289e-05	0.000124702	9.63019e-05	1.20999e-05	0.000104662	2.19819e-05	3.49599e-05	7.16439e-05
C436	3.04912e-05	0.000125947	9.11e-05	0.000112825	0.000212117	0.000114496		7.24495e-05	5.1096e-05	5.04e-05	7.37494e-05	0.000111727	0.000141371	0.000103983	5.18e-05	0.000156455	0.000214404	5.16e-05	0.000122244	7.16e-05	7.12e-05	5.18e-05	8.08e-05		C436	0	0	0	0	0	2.6875e-05	0	0	4.1959e-05	9.9908e-05	0	7.74796e-06	0	0	0	0
T437	1.01574e-05	1.05e-05	4.06e-05	0	2.02e-05	1.62915e-05		2.0879e-05	3.07768e-05	1.01e-05	0	1.02e-05	0	5.2e-05	0	1.21e-05	4.09e-05	2.06e-05	1.02e-05	4.09e-05	4.07e-05	4.12e-05	0		T437	4.58752e-06	1.44853e-05	0	0	0	0	3.57085e-05	0	0	2.46085e-05	4.30851e-06	0	2.46085e-05	2.44085e-05	2.49085e-05	0
G437	0.000264093	0.000252432	7.11e-05	0.000153971	0.000111283	0.000170576		0.000375822	0.000523206	0.000838426	0.000421888	0.000509923	0.000424736	0.000390366	0.000402078	0.000518322	0.000204384	0.000483007	0.000387704	0.000368422	0.000631403	0.000401747	0.000333843		G437	0.000205246	0.00035263	0.00066785	0.000251312	0.000339347	0.00025416	0.00021979	0.000231502	0.000347746	3.38081e-05	0.000312431	0.000217128	0.000197846	0.000460827	0.000231171	0.000163267
C437	0	0.00010518	2.03e-05	0.000133441	0.00015175	8.21342e-05		2.0879e-05	4.10357e-05	0.000141421	6.32831e-05	0.000142778	8.09e-05	0.00011711	3.09e-05	0.000144648	0.000235042	8.22e-05	0.000265271	0.000112573	0.000101839	6.18e-05	0.000111281		C437	0	0	5.92868e-05	0	6.06438e-05	0	3.49758e-05	0	6.25138e-05	0.000152908	6.58e-08	0.000183137	3.04388e-05	1.97048e-05	0	2.91468e-05
A438	7.10501e-05	2.09e-05	2.03e-05	6.14e-05	9.08e-05	5.289e-05		0.000164128	0.000162367	6.04e-05	0.000115624	0.000182984	2.02e-05	7.78e-05	0.00019422	0.000144227	8.16e-05	0.000122604	0.000162707	7.16e-05	9.14e-05	0.000173544	3.03e-05		A438	0.000111238	0.000109477	7.50998e-06	6.27339e-05	0.000130094	0	2.491e-05	0.00014133	9.1337e-05	2.871e-05	6.9714e-05	0.000109817	1.871e-05	3.851e-05	0.000120654	0
T438	2.03e-05	1.05e-05	0.000111784	1.02e-05	2.02e-05	3.45968e-05		8.20639e-05	7.10357e-05	4.03e-05	3.15338e-05	3.05e-05	1.01e-05	3.89e-05	5.11e-05	3.61e-05	4.08e-05	2.04e-05	3.05e-05	4.09e-05	3.05e-05	7.15e-05	3.03e-05		T438	4.74671e-05	3.64389e-05	5.70319e-06	0	0	0	4.30319e-06	1.65032e-05	1.50319e-06	6.20319e-06	0	0	6.30319e-06	0	3.69032e-05	0
C438	1.015e-05	1.05e-05	0	2.05e-05	1.01e-05	1.025e-05		2.0516e-05	1.0148e-05	0	2.10225e-05	1.02e-05	2.02e-05	0	0	0	0	1.02e-05	1.02e-05	0	4.06e-05	0	0		C438	1.0266e-05	0	0	1.07725e-05	0	9.95e-06	0	0	0	0	0	0	0	3.035e-05	0	0
A439	2.0178e-05	2.09e-05	6.08e-05	5.11e-05	6.05e-05	4.26956e-05		0.000122372	0.000191869	2.01e-05	7.35016e-05	7.1e-05	5.03e-05	5.18e-05	7.11e-05	0	0.000111952	8.13e-05	0.000111503	9.17e-05	6.08e-05	7.11e-05	5.04e-05		A439	7.9676e-05	0.000149173	0	3.0806e-05	2.83044e-05	7.60441e-06	9.10441e-06	2.84044e-05	0	6.92564e-05	3.86044e-05	6.88074e-05	4.90044e-05	1.81044e-05	2.84044e-05	7.70441e-06
T439	0.000171513	0.000219622	0.000131704	8.18e-05	0.000171338	0.000155195		0.000183557	0.000141377	0.000150928	0.000115503	0.000141936	6.04e-05	0.000129458	9.14e-05	0.000132046	0.00012213	8.13e-05	0.00015205	7.13e-05	5.07e-05	0.00012193	0.000120951		T439	2.8362e-05	0	0	0	0	0	0	0	0	0	0	0	0	0	0	0
G439	3.0267e-05	4.18e-05	5.07e-05	3.07e-05	0	3.06934e-05		0	5.04918e-05	0	3.15007e-05	2.03e-05	0	0	2.03e-05	2.4e-05	1.02e-05	0	0	0	2.03e-05	1.02e-05	1.01e-05		G439	0	1.97984e-05	0	8.07302e-07	0	0	0	0	0	0	0	0	0	0	0	0
A440	7.09263e-05	4.18e-05	8.12e-05	0.000153567	0.00011101	9.17007e-05		0.000133036	0.000111422	8.05e-05	4.19762e-05	9.13e-05	5.04e-05	0.000103516	7.13e-05	8.4e-05	0.000163066	7.14e-05	0.000111655	7.14e-05	7.1e-05	8.15e-05	4.03e-05		A440	4.13352e-05	1.97211e-05	0	0	0	0	1.18153e-05	0	0	7.13653e-05	0	1.99543e-05	0	0	0	0
T440	0.000253308	0.000177709	1.02e-05	0.000194519	0.000151378	0.000157423		0.000388874	0.000324136	0.000191193	0.000272846	0.000223205	0.000171309	6.47e-05	0.000315685	0.00033613	0.000203832	0.000142792	0.000203009	0.000295924	0.000213023	0.000254619	0.000231824		T440	0.000231451	0.000166713	3.37702e-05	0.000115423	6.57822e-05	1.38862e-05	0	0.000158262	0.000178707	4.64092e-05	0	4.55862e-05	0.000138501	5.56002e-05	9.71962e-05	7.44012e-05
G440	2.02647e-05	4.18e-05	0.000213207	0	0	5.50543e-05		4.09341e-05	2.02585e-05	1.01e-05	0	0	0	0	1.02e-05	0	0	2.04e-05	0	4.08e-05	2.03e-05	1.02e-05	2.02e-05		G440	0	0	0	0	0	0	0	0	0	0	0	0	0	0	0	0
A441	0.000140814	0.000103601	3.06e-05	0.000162308	0.000100745	0.000107614		0.000191826	0.000151112	0.000120669	0.000145759	7.06e-05	0.000160841	0.00012821	0.000161297	0.000190501	0.000131476	0.00013126	0.0001009	0.000131272	0.000160857	0.000191492	0.000110601		A441	8.42126e-05	4.34986e-05	1.30554e-05	3.81454e-05	0	5.32274e-05	2.05964e-05	5.36834e-05	8.28874e-05	2.38624e-05	2.36464e-05	0	2.36584e-05	5.32434e-05	8.38784e-05	2.98742e-06
T441	1.00581e-05	4.14e-05	0.0001426	0.000101443	3.02e-05	6.51402e-05		0.000151442	5.03707e-05	4.02e-05	2.08227e-05	5.04e-05	3.02e-05	3.85e-05	0.000110892	5.95e-05	7.08e-05	5.05e-05	3.03e-05	6.06e-05	4.02e-05	4.03e-05	7.04e-05		T441	8.63015e-05	0	0	0	0	0	0	4.57518e-05	0	5.65977e-06	0	0	0	0	0	5.25977e-06
C441	2.01163e-05	4.14e-05	0.000173157	0	1.01e-05	4.89547e-05		2.01922e-05	3.02224e-05	0	3.12341e-05	3.02e-05	0	1.28e-05	0	7.14e-05	3.03e-05	3.03e-05	2.02e-05	5.05e-05	6.03e-05	2.02e-05	0		C441	0	0	0	0	0	0	0	0	2.24453e-05	0	0	0	1.54535e-06	1.13453e-05	0	0
T442	0.000122187	9.36e-05	0.000122712	0.0001022	7.09e-05	0.00010232		0.000122777	0.00010216	7.06e-05	0.000114956	3.04e-05	8.08e-05	9.02e-05	9.19e-05	0.000108118	8.16e-05	6.15e-05	0.000152374	0.000203339	0.000111116	0.000153285	5.05e-05		T442	2.04574e-05	0	0	1.26359e-05	0	0	0	0	5.79817e-06	0	0	5.00542e-05	0.000101019	8.79617e-06	5.09652e-05	0
G442	0.000213828	0.000208	7.16e-05	0.000143081	4.05e-05	0.000135402		0.000255786	0.000377991	0.000352979	0.000355318	0.000141815	0.000151501	0.000218993	0.00024502	0.000156171	0.000203882	0.000317691	0.000213324	0.00036601	0.000303043	0.000224818	0.000141324		G442	0.000120384	0.000242589	0.000217577	0.000219916	6.4133e-06	1.60993e-05	8.35913e-05	0.000109618	2.07693e-05	6.84803e-05	0.000182289	7.79223e-05	0.000230608	0.000167641	8.94163e-05	5.9223e-06
C442	0	0	7.16e-05	0.00011242	2.03e-05	4.0864e-05		5.11572e-05	3.06479e-05	2.02e-05	0	3.04e-05	3.03e-05	2.58e-05	2.04e-05	9.61e-05	4.08e-05	4.1e-05	4.06e-05	2.03e-05	7.07e-05	4.09e-05	2.02e-05		C442	1.02932e-05	0	0	0	0	0	0	0	5.5236e-05	0	1.36e-07	0	0	2.9836e-05	3.6e-08	0
A443	0.000101553	8.28e-05	4.15e-05	9.19e-05	9.15e-05	8.18505e-05		0.000112496	0.000142581	1.01e-05	0.000114563	0.000122378	6.08e-05	0.000128059	9.2e-05	0.000107737	7.17e-05	9.22e-05	8.19e-05	0.000112703	0.000111378	0.000102217	0.000101266		A443	3.06457e-05	6.07302e-05	0	3.27125e-05	4.05275e-05	0	4.62085e-05	1.01495e-05	2.58865e-05	0	1.03495e-05	4.94517e-08	3.08525e-05	2.95275e-05	2.03665e-05	1.94155e-05
T443	0.000111708	2.07e-05	7.26e-05	0.000102123	8.13e-05	7.76862e-05		5.11347e-05	0.000101843	4.05e-05	5.20741e-05	7.14e-05	0.000101298	1.28e-05	6.13e-05	3.59e-05	5.12e-05	7.17e-05	3.07e-05	4.1e-05	0.000121503	9.2e-05	4.05e-05		T443	0	2.41572e-05	0	0	0	2.36118e-05	0	0	0	0	0	0	0	4.38168e-05	1.43138e-05	0
C443	1.01553e-05	1.03e-05	0.000300877	4.08e-05	1.02e-05	7.44665e-05		2.04539e-05	0	2.03e-05	1.04148e-05	1.02e-05	0	1.28e-05	1.02e-05	2.39e-05	2.05e-05	0	2.05e-05	5.12e-05	1.01e-05	3.07e-05	2.03e-05		C443	0	0	0	0	0	0	0	0	0	0	0	0	0	0	0	0
T444	0.000182473	0.000103784	1.03e-05	0.000112747	0.000132427	0.000108346		0.000122997	0.000193394	0.000213118	0.000156593	9.21e-05	9.14e-05	0.000154115	8.19e-05	0.000180208	0.00019503	0.000164222	0.000225655	0.000246576	7.11e-05	0.00014329	6.09e-05		T444	1.46513e-05	8.5048e-05	0.000104772	4.82464e-05	0	0	4.57689e-05	0	7.18619e-05	8.66839e-05	5.58759e-05	0.000117309	0.00013823	0	3.49439e-05	0
G444	0.000202747	0.000217946	2.06e-05	0.000112747	0.000152801	0.000141368		0.000317743	0.00022393	0.000568314	0.00041758	0.000756871	0.000375581	0.000179801	0.00024571	0.000480556	0.000123177	0.000256597	0.000225655	0.000215754	0.000203031	0.00024564	0.000243714		G444	0.000176375	8.25617e-05	0.000426946	0.000276212	0.000615503	0.000234213	3.84328e-05	0.000104342	0.000339188	0	0.000115229	8.42868e-05	7.43858e-05	6.16628e-05	0.000104272	0.000102346
C444	4.05494e-05	5.19e-05	0.000113523	6.15e-05	0.000101867	7.38679e-05		8.19983e-05	2.03573e-05	6.09e-05	3.13185e-05	0.000112508	0.00012181	3.85e-05	0.000122855	0.000108125	0.000102647	5.13e-05	0.000133342	0.000133562	7.11e-05	8.19e-05	7.11e-05		C444	8.13041e-06	0	0	0	3.86401e-05	4.79421e-05	0	4.89871e-05	3.42571e-05	2.87791e-05	0	5.94741e-05	5.96941e-05	0	8.03211e-06	0
A445	7.0561e-05	9.29e-05	1.04e-05	8.22e-05	8.17e-05	6.75522e-05		9.15164e-05	8.08612e-05	7.11e-05	8.31298e-05	0.000132767	0.000121804	0.000102248	0.00015243	9.58e-05	9.24e-05	8.14e-05	5.13e-05	0.000123355	9.13e-05	0.000111571	0.000101506		A445	2.39642e-05	1.3309e-05	3.54781e-06	1.55776e-05	6.52148e-05	5.42518e-05	3.46958e-05	8.48778e-05	2.82478e-05	2.48478e-05	1.38478e-05	0	5.58028e-05	2.37478e-05	4.40188e-05	3.39538e-05
G445	6.04808e-05	3.1e-05	1.04e-05	8.22e-05	6.12e-05	4.90562e-05		5.08425e-05	3.03229e-05	3.05e-05	3.11737e-05	3.06e-05	2.03e-05	1.28e-05	5.08e-05	1.2e-05	0.000102677	0.000111979	4.11e-05	4.11e-05	3.04e-05	1.01e-05	4.06e-05		G445	1.7863e-06	0	0	0	0	0	0	1.74384e-06	0	5.36208e-05	6.29228e-05	0	0	0	0	0
C445	0.000201603	0.000113548	8.29e-05	0.000164406	9.19e-05	0.000130871		0.000274549	0.000272906	0.000416383	0.000124695	0.000347236	0.000416163	0.000230058	0.000182916	0.000227485	0.000102677	0.000244317	0.000174581	0.000370066	0.000192758	0.000344856	0.000182711		C445	0.000143678	0.000142035	0.000285512	0	0.000216365	0.000285292	9.91867e-05	5.20447e-05	9.66137e-05	0	0.000113446	4.37097e-05	0.000239195	6.18867e-05	0.000213985	5.18397e-05
A446	4.09316e-05	6.05e-05	4.08e-05	0.000111925	2.02e-05	5.48713e-05		5.14583e-05	0.000143416	6.06e-05	9.1352e-05	8.16e-05	3.04e-05	3.75e-05	0.000116091	0.000116966	0.000102223	0.000115521	4.09e-05	0.000102399	6.08e-05	0.000105281	4.05e-05		A446	0	8.85449e-05	5.72868e-06	3.64807e-05	2.67287e-05	0	0	6.12197e-05	6.20947e-05	4.73517e-05	6.06497e-05	0	4.75277e-05	5.92868e-06	5.04097e-05	0
T446	8.18632e-05	4.03e-05	0.000387415	0.00010175	6.07e-05	0.000134406		0.000247	0.000133172	0.000131261	5.07511e-05	9.19e-05	7.1e-05	0.00014994	0.000158306	0.000105269	7.16e-05	0.000115521	9.2e-05	0.000163839	0.000121539	0.000168449	0.000121634		T446	0.000112594	0	0	0	0	0	1.55344e-05	2.39004e-05	0	0	0	0	2.94334e-05	0	3.40434e-05	0
G446	0	0	0	2.04e-05	1.01e-05	6.1e-06		3.0875e-05	2.0488e-05	3.03e-05	2.03004e-05	4.08e-05	0	0	3.17e-05	2.34e-05	1.02e-05	7.35e-05	1.02e-05	4.1e-05	0	1.05e-05	1.01e-05		G446	2.4775e-05	1.4388e-05	2.42e-05	1.42004e-05	3.47e-05	0	0	2.56e-05	1.73e-05	4.1e-06	6.74e-05	4.1e-06	3.49e-05	0	4.4e-06	4e-06
T447	8.15245e-05	0.000191068	9.12e-05	0.000182402	0.000141321	0.000137503		0.000103038	4.09802e-05	0.000161385	0.000111453	0.000265055	0.000374623	7.48e-05	8.41e-05	0.000209942	0.000183494	0.000104688	0.000163204	0.000224735	0.00023268	0.000105084	0.000222778		T447	0	0	2.38819e-05	0	0.000127552	0.00023712	0	0	7.24389e-05	4.59909e-05	0	2.57009e-05	8.72319e-05	9.51769e-05	0	8.52749e-05
G447	0.000152858	0.000201124	0.000101305	9.12e-05	0.000100944	0.000129486		0.000432758	0.000450783	0.000322769	0.000445813	0.00025486	0.000283498	0.000261813	0.000347007	0.000209942	0.000326211	0.00026172	0.000265206	0.000357533	0.000242797	0.000304743	0.000465809		G447	0.000303271	0.000321296	0.000193283	0.000316327	0.000125374	0.000154012	0.000132327	0.000217521	8.04557e-05	0.000196725	0.000132234	0.00013572	0.000228047	0.000113311	0.000175257	0.000336323
C447	0.000101906	0.000150843	0.000111435	0.000111468	0.000242265	0.000143583		4.1215e-05	6.14704e-05	0.000211817	0.000162114	0.000448554	0.000334123	0.000112205	0.000115669	0.00037323	0.000336405	7.33e-05	0.000418209	0.000296242	0.000303496	0.000147118	0.000384798		C447	0	0	6.82337e-05	1.85306e-05	0.000304971	0.00019054	0	0	0.000229647	0.000192822	0	0.000274626	0.000152659	0.000159913	3.53467e-06	0.000241215
A448	6.39959e-05	9.1e-05	4.03e-05	8.19e-05	9.17e-05	7.37792e-05		4.36839e-05	7.57535e-05	9.18e-05	0.000163544	0.000105302	7.22e-05	0.000100485	6.01e-05	9.54e-05	0.000114889	0.000117414	0.000126164	5.28e-05	0.000134184	5.97e-05	9.3e-05		A448	0	1.9743e-06	1.80208e-05	8.97648e-05	3.15228e-05	0	2.67058e-05	0	2.16208e-05	4.11098e-05	4.36348e-05	5.23848e-05	0	6.04048e-05	0	1.92208e-05
G448	4.26639e-05	4.05e-05	8.07e-05	7.16e-05	7.13e-05	6.13528e-05		6.55258e-05	6.49316e-05	0	6.1329e-05	5.27e-05	2.06e-05	5.02e-05	2.4e-05	5.96e-05	5.22e-05	1.17e-05	6.31e-05	6.33e-05	0	4.78e-05	6.2e-05		G448	4.173e-06	3.57876e-06	0	0	0	0	0	0	0	0	0	1.74721e-06	1.94721e-06	0	0	6.47213e-07
C448	0.000181322	0.000111274	0	8.19e-05	0.000162979	0.000107495		0.000371313	0.000389589	0.000163187	0.000419081	0.000284315	0.000350642	0.000276333	0.000240448	0.000214713	0.000187999	0.000305275	0.000189247	0.000168878	0.00022708	0.000238877	0.000206577		C448	0.000263818	0.000282094	5.56921e-05	0.000311587	0.00017682	0.000243147	0.000168838	0.000132953	0.000107218	8.05041e-05	0.00019778	8.17521e-05	6.13831e-05	0.000119585	0.000131382	9.90821e-05
A449	0.000146278	0.000252077	0.000120863	0.000122655	0.000132376	0.00015485		0.00021542	0.00014902	0.000101912	0.000153041	4.21e-05	0.000102989	0.000125257	8.19e-05	8.35e-05	9.4e-05	0.000161672	8.41e-05	0.000168798	0.000154548	8.2e-05	3.09e-05		A449	6.05699e-05	0	0	0	0	0	0	0	0	0	6.82215e-06	0	1.39481e-05	0	0	0
T449	5.22422e-05	5.04e-05	2.01e-05	6.13e-05	8.15e-05	5.31084e-05		8.61679e-05	0.000117087	4.08e-05	7.14191e-05	0	1.03e-05	2.51e-05	2.34e-05	2.39e-05	4.18e-05	1.15e-05	9.46e-05	2.11e-05	2.06e-05	0	3.09e-05		T449	3.30595e-05	6.39788e-05	0	1.83107e-05	0	0	0	0	0	0	0	4.14916e-05	0	0	0	0
C449	2.08969e-05	6.05e-05	0.000161151	2.04e-05	0	5.25896e-05		0	0	2.04e-05	0	0	3.09e-05	0	0	0	0	1.15e-05	0	0	2.06e-05	4.68e-05	0		C449	0	0	0	0	0	0	0	0	0	0	0	0	0	0	0	0
A450	0.000102467	0.000150781	0.000130627	0.000101626	9.11e-05	0.00011532		5.30391e-05	0.000146583	0.000111618	0.000193068	0.00013607	0.000123121	6.24e-05	0.000125696	0.000106748	0.00010378	0.000124888	0.000125151	7.32e-05	0.000102639	8.05e-05	0.000133631		A450	0	3.12628e-05	0	7.77476e-05	2.07497e-05	7.80072e-06	0	1.03757e-05	0	0	9.56772e-06	9.83072e-06	0	0	0	1.83107e-05
G450	5.12337e-05	0	3.01e-05	5.08e-05	0	2.64267e-05		3.18235e-05	2.09404e-05	1.01e-05	1.01615e-05	3.14e-05	2.05e-05	3.74e-05	6.86e-05	4.74e-05	2.08e-05	4.54e-05	4.17e-05	5.23e-05	1.03e-05	5.75e-05	1.03e-05		G450	5.39674e-06	0	0	0	4.97326e-06	0	1.09733e-05	4.21733e-05	2.09733e-05	0	1.89733e-05	1.52733e-05	2.58733e-05	0	3.10733e-05	0
C450	0.000102467	0.000120625	0.00017082	5.08e-05	0.000111368	0.000111216		0.00024398	0.00048163	0.00049721	0.000558881	0.000366343	0.000215462	0.000324303	0.000194257	0.000154191	0.000176425	0.000181655	0.000271161	0.000240674	0.000338708	0.000149544	0.000215865		C450	0.000132764	0.000370414	0.000385994	0.000447665	0.000255127	0.000104246	0.000213087	8.30409e-05	4.29749e-05	6.52089e-05	7.04389e-05	0.000159945	0.000129458	0.000227492	3.83279e-05	0.000104649
A451	7.05482e-05	7.04e-05	5.04e-05	9.11e-05	2.02e-05	6.05296e-05		7.23604e-05	7.09788e-05	4.04e-05	0.000101288	5.21e-05	2.04e-05	1.24e-05	4.34e-05	5.9e-05	5.17e-05	4.39e-05	3.11e-05	7.28e-05	6.13e-05	4.41e-05	4.09e-05		A451	1.18308e-05	1.04492e-05	0	4.07588e-05	0	0	0	0	0	0	0	0	1.22704e-05	7.70368e-07	0	0
T451	0.00018141	0.000170923	0.000121054	0.000263161	0.00027209	0.000201728		0.000341128	0.000283915	0.00017161	0.00026335	0.000250055	0.000347155	0.000186396	0.000260259	0.000247817	0.000196295	0.000274237	0.000207192	0.000218336	0.000163504	0.000231527	0.000296721		T451	0.0001394	8.21877e-05	0	6.16223e-05	4.83275e-05	0.000145427	0	5.85315e-05	4.60895e-05	0	7.25095e-05	5.46449e-06	1.66085e-05	0	2.97995e-05	9.49935e-05
G451	3.02349e-05	5.03e-05	1.01e-05	0	3.02e-05	2.4167e-05		2.06744e-05	5.06991e-05	5.05e-05	1.01288e-05	2.08e-05	1.02e-05	1.24e-05	2.17e-05	0	3.1e-05	2.19e-05	1.04e-05	4.16e-05	4.09e-05	2.21e-05	2.05e-05		G451	0	2.65322e-05	2.6333e-05	0	0	0	0	0	0	6.83301e-06	0	0	1.7433e-05	1.6733e-05	0	0
A452	0.000131295	0.000131036	1.01e-05	0.00011216	0.000152255	0.000107369		0.000164145	0.000212841	0.000101145	0.00027323	0.000104217	0.000183655	0.000136504	0.000266192	0.000118375	0.000196924	0.000239323	0.000103741	0.000146042	0.000122623	0.000129883	0.000112537		A452	5.67755e-05	0.000105472	0	0.00016586	0	7.62859e-05	2.91349e-05	0.000158823	1.10059e-05	8.95549e-05	0.000131954	0	3.86729e-05	1.52539e-05	2.25139e-05	5.16789e-06
T452	8.07967e-05	8.06e-05	0.00010114	6.12e-05	4.06e-05	7.28673e-05		8.20723e-05	6.08118e-05	3.03e-05	0.000101196	6.25e-05	5.1e-05	2.48e-05	7.45e-05	0	6.22e-05	4.35e-05	5.19e-05	6.26e-05	4.09e-05	8.66e-05	3.07e-05		T452	9.205e-06	0	0	2.83288e-05	0	0	0	1.63267e-06	0	0	0	0	0	0	1.37327e-05	0
C452	1.00996e-05	2.02e-05	0.000111254	2.04e-05	5.08e-05	4.25507e-05		5.12952e-05	2.02706e-05	4.05e-05	7.08373e-05	3.13e-05	3.06e-05	3.72e-05	2.13e-05	2.37e-05	7.26e-05	1.09e-05	3.11e-05	5.22e-05	7.15e-05	0	0		C452	8.74449e-06	0	0	2.82866e-05	0	0	0	0	0	3.00493e-05	0	0	9.64928e-06	2.89493e-05	0	0
T453	7.12251e-05	6.08e-05	4.06e-05	5.12e-05	0.000102272	6.52194e-05		9.74912e-05	0.000117133	0.000142971	0.000143217	0.000105361	0.000103063	5e-05	0.000115825	7.15e-05	8.35e-05	8.84e-05	0.000115218	9.48e-05	0.000103026	0.000171359	0.000124002		T453	3.22718e-05	5.1914e-05	7.77516e-05	7.79972e-05	4.01416e-05	3.78436e-05	0	5.06056e-05	6.28059e-06	1.82806e-05	2.31806e-05	4.99986e-05	2.95806e-05	3.78066e-05	0.00010614	5.87826e-05
G453	8.14001e-05	0.00017237	0.000182585	0.000102413	0.000132954	0.000134344		0.000314138	0.000468534	0.000194032	0.000398961	0.00029501	0.000216432	8.75e-05	0.000305356	0.000107194	0.000135752	0.000187758	0.000293283	0.000315839	0.00031938	0.000224909	0.000175669		G453	0.000179794	0.000334189	5.96876e-05	0.000264616	0.000160666	8.20876e-05	0	0.000171012	0	1.40758e-06	5.34136e-05	0.000158939	0.000181495	0.000185036	9.05646e-05	4.13246e-05
C453	1.0175e-05	3.04e-05	0.000192729	7.17e-05	8.18e-05	7.73608e-05		2.16647e-05	3.19455e-05	7.15e-05	8.18381e-05	0.000136969	0	2.5e-05	4.21e-05	4.76e-05	6.27e-05	7.73e-05	1.05e-05	6.32e-05	2.06e-05	6.43e-05	4.13e-05		C453	0	0	0	4.47728e-06	5.96082e-05	0	0	0	0	0	0	0	0	0	0	0
T454	0.000100861	5.08e-05	8.09e-05	3.08e-05	1.02e-05	5.47123e-05		6.52699e-05	8.52361e-05	1.02e-05	5.12868e-05	2.11e-05	1.03e-05	7.51e-05	8.36e-05	2.39e-05	4.19e-05	4.39e-05	7.35e-05	5.28e-05	1.03e-05	6.38e-05	7.24e-05		T454	1.05576e-05	3.05238e-05	0	0	0	0	2.03877e-05	2.88877e-05	0	0	0	1.87877e-05	0	0	9.08773e-06	1.76877e-05
G454	0.000151292	0.000162493	1.01e-05	0.000194876	0.000276733	0.000159099		0.000467768	0.000607307	0.000429874	0.000400037	0.000359343	0.0001755	0.000300259	0.00018809	0.000250785	0.000230222	0.000318321	0.000199599	0.000264025	0.000288979	0.000276425	0.000475905		G454	0.000308669	0.000448208	0.000270775	0.000240938	0.000200244	1.64012e-05	0.00014116	2.89912e-05	9.16862e-05	7.11232e-05	0.000159222	4.05002e-05	0.000104926	0.00012988	0.000117326	0.000316806
C454	2.01723e-05	8.12e-05	0	0.000215389	0.000184489	0.00010025		4.35133e-05	6.3927e-05	0.000133056	0.00015386	0.000147965	0.000134206	0.000150129	2.09e-05	0.00016719	0.000198828	3.29e-05	0.000147073	0.000242903	2.06e-05	2.13e-05	8.28e-05		C454	0	0	3.28059e-05	5.36103e-05	4.77149e-05	3.39559e-05	4.98789e-05	0	6.69399e-05	9.85779e-05	0	4.68229e-05	0.000142653	0	0	0
A455	4.02674e-05	0.0001317	3.03e-05	1.02e-05	5.11e-05	5.27135e-05		0.000130661	9.48397e-05	0.000122851	0.000143631	0.000127073	5.17e-05	0.000149972	0.000110596	0.000107491	9.42e-05	0.000104674	0.000136619	8.46e-05	7.23e-05	0.000172096	0.000124329		A455	7.79471e-05	4.21262e-05	7.01375e-05	9.09175e-05	7.43595e-05	0	9.72585e-05	5.78825e-05	5.47775e-05	4.14865e-05	5.19605e-05	8.39055e-05	3.18865e-05	1.95865e-05	0.000119383	7.16155e-05
T455	6.04011e-05	7.09e-05	0.000131155	2.05e-05	2.04e-05	6.06712e-05		1.08884e-05	6.32264e-05	9.21e-05	1.02594e-05	5.29e-05	4.14e-05	1.25e-05	7.04e-05	1.19e-05	5.23e-05	2.09e-05	4.2e-05	4.23e-05	0	2.02e-05	2.07e-05		T455	0	2.55523e-06	3.14288e-05	0	0	0	0	9.72879e-06	0	0	0	0	0	0	0	0
C455	3.02005e-05	0	0	5.12e-05	0	1.62801e-05		0	0	0	0	0	0	0	1.01e-05	0	0	1.05e-05	0	1.06e-05	0	2.02e-05	0		C455	0	0	0	0	0	0	0	0	0	0	0	0	0	0	3.91989e-06	0
A456	9.03333e-05	3.04e-05	6.06e-05	2.05e-05	5.11e-05	5.05867e-05		2.16628e-05	8.35029e-05	5.11e-05	3.07421e-05	5.29e-05	2.07e-05	7.49e-05	6.03e-05	9.58e-05	2.1e-05	2.07e-05	2.1e-05	1.06e-05	6.2e-05	6.03e-05	4.14e-05		A456	0	3.29163e-05	5.13334e-07	0	2.31333e-06	0	2.43133e-05	9.71333e-06	4.52133e-05	0	0	0	0	1.14133e-05	9.71333e-06	0
G456	0	4.05e-05	0.000252444	5.12e-05	8.18e-05	8.51888e-05		2.16628e-05	1.04379e-05	2.04e-05	5.12369e-05	7.41e-05	6.2e-05	3.75e-05	2.01e-05	8.38e-05	4.19e-05	6.21e-05	4.2e-05	8.46e-05	3.1e-05	4.02e-05	3.11e-05		G456	0	0	0	0	0	0	0	0	0	0	0	0	0	0	0	0
C456	0.000110407	0.000101237	1.01e-05	9.22e-05	0.000214722	0.000105733		0.000173303	0.00029226	0.000153291	0.000204947	0.000137544	0.000165397	0.00011239	0.000110514	0.000167564	7.33e-05	0.000186397	0.000157646	0.000137527	0.000124046	0.000180772	0.00029002		C456	6.75694e-05	0.000186527	4.75577e-05	9.92142e-05	3.18107e-05	5.96637e-05	6.65672e-06	4.78072e-06	6.18307e-05	0	8.06637e-05	5.19127e-05	3.17937e-05	1.83127e-05	7.50387e-05	0.000184287
T457	0.000110272	0.000141293	5.04e-05	7.14e-05	1.02e-05	7.67131e-05		5.392e-05	0.000103859	7.14e-05	2.04505e-05	3.16e-05	5.15e-05	8.72e-05	0.0001204	0.000143015	9.38e-05	8.22e-05	0.000125456	8.43e-05	7.21e-05	8.02e-05	3.1e-05		T457	0	2.71463e-05	0	0	0	0	1.04869e-05	4.36869e-05	6.63019e-05	1.70869e-05	5.48693e-06	4.87429e-05	7.58693e-06	0	3.48693e-06	0
G457	0.000110272	0.000191755	1.01e-05	5.1e-05	0.000122227	9.70709e-05		0.000301952	0.000373894	0.000183496	0.000409011	0.000284456	0.000257578	0.000161937	0.000220733	0.000166851	0.000218821	0.000205493	0.000177729	0.000136972	0.000288532	0.000220658	0.000196324		G457	0.000204881	0.000276823	8.64251e-05	0.00031194	0.000187385	0.000160507	6.48661e-05	0.000123662	6.97801e-05	0.00012175	0.000108422	8.06581e-05	3.99011e-05	0.000191461	0.000123587	9.92531e-05
C457	2.00495e-05	0	1.01e-05	1.02e-05	3.06e-05	1.41899e-05		1.0784e-05	1.03859e-05	5.1e-05	1.02253e-05	3.16e-05	2.06e-05	4.98e-05	0	0.000107262	4.17e-05	2.05e-05	9.41e-05	7.38e-05	5.15e-05	1e-05	3.1e-05		C457	0	0	3.68101e-05	0	1.74101e-05	6.4101e-06	3.56101e-05	0	9.30721e-05	2.75101e-05	6.3101e-06	7.99101e-05	5.96101e-05	3.73101e-05	0	1.68101e-05
A458	9.03614e-05	0.000111088	0.000131628	4.09e-05	3.06e-05	8.09155e-05		9.70256e-05	6.22181e-05	6.12e-05	0.000102326	0.000116086	4.12e-05	2.49e-05	9.04e-05	4.78e-05	3.13e-05	0.000112884	7.34e-05	0.000179431	5.16e-05	7.03e-05	4.14e-05		A458	1.61101e-05	0	0	2.14104e-05	3.51705e-05	0	0	9.48451e-06	0	0	3.19685e-05	0	9.85155e-05	0	0	0
G458	3.01205e-05	4.04e-05	0.000151879	5.11e-05	2.04e-05	5.87799e-05		2.15613e-05	3.1109e-05	2.04e-05	4.09303e-05	3.17e-05	2.06e-05	0	1e-05	2.39e-05	3.13e-05	5.13e-05	1.05e-05	6.33e-05	2.06e-05	3.01e-05	4.14e-05		G458	0	0	0	0	0	0	0	0	0	0	0	0	4.5201e-06	0	0	0
C458	9.03614e-05	8.08e-05	6.08e-05	8.18e-05	8.17e-05	7.90923e-05		0.000323419	0.000248872	0.000163282	0.000133024	0.000232173	0.000237167	0.000199469	0.00017078	0.000119419	0.000125315	0.000123146	0.000167667	0.000105548	0.000237263	0.000130628	0.000331054		C458	0.000244326	0.00016978	8.41897e-05	5.39313e-05	0.000153081	0.000158075	0.000120377	9.16877e-05	4.03267e-05	4.62227e-05	4.40537e-05	8.85747e-05	2.64557e-05	0.000158171	5.15357e-05	0.000251962
A459	0.000130389	0.000131421	9.18e-05	0.000235465	0.000112394	0.000140294		0.000150484	0.000175518	0.000153178	0.000153602	0.00013746	8.25e-05	0.000124741	0.000180616	0.000119444	0.000188283	0.000204132	0.000178311	0.000105656	0.000185889	0.000170616	0.000269226		A459	1.01905e-05	3.52246e-05	1.28843e-05	1.33083e-05	0	0	0	4.03223e-05	0	4.79893e-05	6.38383e-05	3.80173e-05	0	4.55953e-05	3.03223e-05	0.000128932
T459	4.01196e-05	5.05e-05	7.14e-05	0.000133089	8.17e-05	7.53617e-05		8.5991e-05	8.25968e-05	4.08e-05	1.02401e-05	2.11e-05	4.13e-05	2.49e-05	4.01e-05	5.97e-05	2.09e-05	5.1e-05	6.29e-05	5.28e-05	7.23e-05	6.02e-05	6.21e-05		T459	1.06293e-05	7.23513e-06	0	0	0	0	0	0	0	0	0	0	0	0	0	0
C459	2.00598e-05	2.02e-05	2.04e-05	5.12e-05	4.09e-05	3.0552e-05		2.14977e-05	0	4.08e-05	2.04803e-05	1.06e-05	1.03e-05	4.99e-05	2.01e-05	1.19e-05	1.05e-05	4.08e-05	1.05e-05	1.06e-05	5.16e-05	1e-05	1.04e-05		C459	0	0	1.0248e-05	0	0	0	1.9348e-05	0	0	0	1.0248e-05	0	0	2.1048e-05	0	0
T460	5.01404e-05	6.04e-05	0.000153247	0.000121891	0.000111476	9.94309e-05		5.16289e-05	9.08935e-05	7.07e-05	9.12899e-05	0.000104431	0.000102276	9.89e-05	0.000100385	4.74e-05	1.04e-05	0.000140849	8.29e-05	0.000125296	6.14e-05	9.03e-05	8.21e-05		T460	0	0	0	0	5.00012e-06	2.84512e-06	0	9.54121e-07	0	0	4.14181e-05	0	2.58651e-05	0	0	0
G460	0.000361011	0.000372698	0.000132814	0.000365672	0.000263489	0.000299137		0.00046466	0.000646354	0.000363489	0.000527453	0.000480383	0.00046024	0.000444966	0.000441696	0.000497395	0.000425157	0.000513094	0.000424994	0.000480302	0.000440303	0.000501917	0.000502977		G460	0.000165523	0.000347217	6.43522e-05	0.000228316	0.000181246	0.000161103	0.000145829	0.000142559	0.000198258	0.00012602	0.000213957	0.000125857	0.000181165	0.000141166	0.00020278	0.00020384
C460	3.00842e-05	7.05e-05	0.000122598	5.08e-05	8.11e-05	7.10164e-05		6.19547e-05	3.02978e-05	3.03e-05	3.043e-05	5.22e-05	2.05e-05	7.42e-05	3.01e-05	7.11e-05	4.15e-05	2.01e-05	7.26e-05	5.22e-05	7.17e-05	5.02e-05	8.21e-05		C460	0	0	0	0	0	0	3.18355e-06	0	8.35528e-08	0	0	1.58355e-06	0	6.83553e-07	0	1.10836e-05
A461	3.02383e-05	6.05e-05	9.22e-05	0.000152532	4.05e-05	7.51941e-05		3.04562e-05	0.000141748	1.01e-05	4.03425e-05	7.25e-05	6.09e-05	0.000122523	0	0.000129238	0.000154083	3.03e-05	0.000112515	8.24e-05	8.12e-05	6.04e-05	6.11e-05		A461	0	6.65537e-05	0	0	0	0	4.73289e-05	0	5.40439e-05	7.88889e-05	0	3.73209e-05	7.20594e-06	6.00594e-06	0	0
T461	0.000231827	0.000362845	4.1e-05	0.000203376	0.000313924	0.000230594		0.000253802	0.000323995	0.000141411	0.000352997	0.000269215	0.000385442	0.000392075	0.000271548	0.000270226	0.000154083	0.000252156	0.000225029	0.000257557	0.000213142	0.000241427	0.000254624		T461	2.32076e-05	9.34005e-05	0	0.000122403	3.86206e-05	0.000154848	0.000161481	4.09536e-05	3.96316e-05	0	2.15616e-05	0	2.69626e-05	0	1.08326e-05	2.40296e-05
G461	2.01589e-05	4.03e-05	0.000143353	3.05e-05	3.04e-05	5.29424e-05		2.03042e-05	1.01248e-05	1.01e-05	1.00856e-05	1.04e-05	5.07e-05	2.45e-05	3.02e-05	5.87e-05	4.11e-05	1.01e-05	6.14e-05	4.12e-05	4.06e-05	3.02e-05	4.07e-05		G461	0	0	0	0	0	0	0	0	5.75763e-06	0	0	8.45763e-06	0	0	0	0
A462	0.000190753	0.000101028	4.06e-05	0.000143215	0.000111903	0.0001175		0.000121184	0.000190936	0.000101402	0.000151543	0.000187475	0.000162764	7.37e-05	0.000231058	0.000129829	0.000165259	0.000140905	9.25e-05	0.000217795	0.00011194	0.000170837	0.000122543		A462	3.68407e-06	7.34357e-05	0	3.40428e-05	6.99751e-05	4.52641e-05	0	0.000113558	1.23291e-05	4.77591e-05	2.34051e-05	0	0.000100295	0	5.33371e-05	5.0431e-06
T462	2.00793e-05	7.07e-05	8.11e-05	9.21e-05	7.12e-05	6.70359e-05		9.0888e-05	5.02462e-05	4.06e-05	5.05142e-05	8.33e-05	9.16e-05	4.92e-05	3.01e-05	5.9e-05	5.16e-05	6.04e-05	8.22e-05	8.3e-05	7.12e-05	5.02e-05	7.15e-05		T462	2.38521e-05	0	0	0	1.62641e-05	2.45641e-05	0	0	0	0	0	1.51641e-05	1.59641e-05	4.16414e-06	0	4.46414e-06
C462	3.0119e-05	1.01e-05	2.03e-05	3.07e-05	2.03e-05	2.23038e-05		1.00987e-05	3.01477e-05	1.01e-05	3.03085e-05	0	2.03e-05	2.46e-05	0	0	2.07e-05	3.02e-05	4.11e-05	1.04e-05	2.04e-05	0	2.04e-05		C462	0	7.84393e-06	0	8.00475e-06	0	0	2.29621e-06	0	0	0	7.89621e-06	1.87962e-05	0	0	0	0
T463	8.03778e-05	0.000110903	0.000141739	8.13e-05	0.000142037	0.000111271		0.000111637	0.000121204	5.05e-05	8.06313e-05	6.22e-05	9.13e-05	0.00013484	8.04e-05	7.05e-05	9.25e-05	0.00012082	7.16e-05	6.19e-05	0.00013197	5.02e-05	0.000112047		T463	3.65237e-07	9.9322e-06	0	0	0	0	2.35686e-05	0	0	0	9.54864e-06	0	0	2.06986e-05	0	7.75645e-07
G463	0.000100472	0.000171395	0.000111366	5.08e-05	4.06e-05	9.49266e-05		0.000243571	0.000262608	0.000262685	0.000332604	0.000269388	0.000294303	0.000196131	0.000261265	0.000235026	0.000246751	0.000201367	0.00027624	0.000134029	0.000243638	0.000190936	0.000275025		G463	0.000148644	0.000167681	0.000167758	0.000237678	0.000174461	0.000199376	0.000101204	0.000166338	0.000140099	0.000151824	0.00010644	0.000181313	3.91024e-05	0.000148711	9.60094e-05	0.000180098
C463	2.00944e-05	3.02e-05	0.000283478	2.03e-05	6.09e-05	8.29945e-05		3.04463e-05	2.02006e-05	2.02e-05	1.00789e-05	5.18e-05	1.01e-05	2.45e-05	0	3.53e-05	0.000102813	4.03e-05	4.09e-05	5.15e-05	3.05e-05	2.01e-05	2.04e-05		C463	0	0	0	0	0	0	0	0	0	1.98185e-05	0	0	0	0	0	0
A464	2.00793e-05	7.07e-05	4.1e-05	0.000132999	9.16e-05	7.12757e-05		3.03921e-05	3.01508e-05	0.000121555	7.06999e-05	0.000197548	8.14e-05	3.68e-05	3.01e-05	9.44e-05	0.000103265	2.01e-05	0.000123263	0.000165714	8.14e-05	3.01e-05	0.000122547		A464	0	0	5.02793e-05	0	0.000126272	1.01243e-05	0	0	2.31243e-05	3.19893e-05	0	5.19873e-05	9.44383e-05	1.01243e-05	0	5.12713e-05
T464	7.02776e-05	0.000121193	4.1e-05	0.000122768	0.000142511	9.95499e-05		0.000172222	6.03015e-05	0	3.03e-05	8.32e-05	5.09e-05	3.68e-05	6.03e-05	7.08e-05	2.07e-05	6.04e-05	9.24e-05	5.18e-05	0.000111923	9.04e-05	2.04e-05		T464	7.26717e-05	0	0	0	0	0	0	0	0	0	0	0	0	1.23731e-05	0	0
G464	1.00397e-05	0	0.000122882	0	0	2.65843e-05		1.01307e-05	1.00503e-05	0	0	2.08e-05	1.02e-05	0	1e-05	0	0	1.01e-05	2.05e-05	2.07e-05	2.03e-05	0	0		G464	0	0	0	0	0	0	0	0	0	0	0	0	0	0	0	0
A465	5.01555e-05	7.06e-05	0.000122903	5.09e-05	3.04e-05	6.49917e-05		1.01954e-05	4.01296e-05	7.08e-05	0.000151381	0	0.000111903	2.46e-05	9.03e-05	3.53e-05	1.03e-05	0.000120515	3.08e-05	2.07e-05	3.05e-05	2.01e-05	5.11e-05		A465	0	0	5.8083e-06	8.63889e-05	0	4.69113e-05	0	2.53083e-05	0	0	5.55233e-05	0	0	0	0	0
G465	1.00311e-05	1.01e-05	2.05e-05	4.07e-05	1.01e-05	1.82862e-05		6.11727e-05	2.00648e-05	0	2.01841e-05	8.3e-05	1.02e-05	7.37e-05	2.01e-05	2.35e-05	5.14e-05	6.03e-05	5.13e-05	4.14e-05	3.05e-05	3.01e-05	3.07e-05		G465	4.28865e-05	1.77859e-06	0	1.89786e-06	6.47138e-05	0	5.54138e-05	1.81378e-06	5.21378e-06	3.31138e-05	4.20138e-05	3.30138e-05	2.31138e-05	1.22138e-05	1.18138e-05	1.24138e-05
C465	0.000170529	0.000141261	2.05e-05	5.09e-05	0.000202803	0.000117199		0.000163127	0.000431393	0.000273091	0.000363313	0.00035269	0.000244153	0.000196512	0.000160477	0.000200167	0.000133768	0.000261115	0.000256515	0.000330862	0.000172884	0.000160489	0.00025543		C465	4.59286e-05	0.000314195	0.000155892	0.000246115	0.000235491	0.000126954	7.93135e-05	4.32785e-05	8.29685e-05	1.65695e-05	0.000143916	0.000139316	0.000213663	5.56855e-05	4.32905e-05	0.000138231
A466	6.02767e-05	4.03e-05	0.000172678	5.1e-05	7.1e-05	7.90509e-05		1.02159e-05	9.05597e-05	5.06e-05	4.03759e-05	3.11e-05	4.07e-05	9.83e-05	8.04e-05	3.54e-05	5.15e-05	5.03e-05	3.08e-05	3.1e-05	1.02e-05	4.02e-05	0.000122607		A466	0	1.15087e-05	0	0	0	0	1.92491e-05	1.34907e-06	0	0	0	0	0	0	0	4.35561e-05
G466	4.01844e-05	1.01e-05	1.02e-05	3.06e-05	0	1.82169e-05		5.10793e-05	0	8.09e-05	3.02819e-05	3.11e-05	1.02e-05	1.23e-05	3.01e-05	8.25e-05	4.12e-05	4.03e-05	1.03e-05	3.1e-05	2.04e-05	3.01e-05	5.11e-05		G466	3.28624e-05	0	6.26831e-05	1.2065e-05	1.28831e-05	0	0	1.18831e-05	6.42831e-05	2.29831e-05	2.20831e-05	0	1.27831e-05	2.18311e-06	1.18831e-05	3.28831e-05
C466	0.000221014	0.000141212	0.000121891	0.000193804	0.000121778	0.00015994		0.00041885	0.000291803	0.000394402	0.000363383	0.000248805	0.000223857	0.000307231	0.000231098	0.000294651	0.000267873	0.000181198	0.000328518	0.000248126	0.00023404	0.000391787	0.000306517		C466	0.00025891	0.000131863	0.000234462	0.000203443	8.88651e-05	6.39171e-05	0.000147291	7.11581e-05	0.000134711	0.000107933	2.12581e-05	0.000168578	8.81861e-05	7.41001e-05	0.000231847	0.000146577
A467	4.00978e-05	9.08e-05	3.03e-05	0.000255564	0.00014243	0.000111838		0.000131337	3.00984e-05	0.000111382	0.000161461	0.000218096	6.11e-05	7.37e-05	4.01e-05	0.000129916	0.000113667	6.03e-05	0.000195367	0.000186556	7.12e-05	2.01e-05	0.000143091		A467	1.94986e-05	0	0	4.96229e-05	0.000106258	0	0	0	1.80776e-05	1.82863e-06	0	8.35286e-05	7.47176e-05	0	0	3.12526e-05
T467	9.02201e-05	7.06e-05	0.000181781	7.16e-05	0.000132256	0.000109291		0.000191954	0.000120394	0.000202513	0.00015137	0.000155783	0.000162896	0.000171916	0.000180525	0.000106295	0.000113667	0.000140704	0.000113107	0.00019692	0.000122037	0.000150463	0.000153312		T467	8.26627e-05	1.11023e-05	9.32216e-05	4.20785e-05	4.64916e-05	5.36046e-05	6.26246e-05	7.12336e-05	0	4.37557e-06	3.14126e-05	3.81557e-06	8.76286e-05	1.27456e-05	4.11716e-05	4.40206e-05
G467	2.00489e-05	0	2.02e-05	3.07e-05	1.02e-05	1.62298e-05		3.03085e-05	3.00984e-05	0	1.00913e-05	0	1.02e-05	0	0	4.72e-05	0	4.02e-05	1.03e-05	2.07e-05	0	3.01e-05	3.07e-05		G467	1.40788e-05	1.38686e-05	0	0	0	0	0	0	3.09702e-05	0	2.39702e-05	0	4.47022e-06	0	1.38702e-05	1.44702e-05
T468	7.03489e-05	5.05e-05	0.000162803	4.08e-05	4.07e-05	7.30304e-05		7.10581e-05	6.0384e-05	0	6.06569e-05	3.07e-05	0	7.28e-05	3.01e-05	9.32e-05	1.02e-05	5.03e-05	3.06e-05	4.09e-05	9.1e-05	5.02e-05	2.02e-05		T468	0	0	0	0	0	0	0	0	2.01696e-05	0	0	0	0	1.79696e-05	0	0
G468	0.000301495	0.000343719	1.02e-05	0.000203926	0.000213856	0.000214639		0.000192872	0.000563584	0.000536703	0.000303285	0.000756631	0.000394713	0.000740606	0.000311451	0.000442813	0.000499714	0.000452817	0.000234629	0.000562315	0.000414757	0.000190868	0.000566578		G468	0	0.000348945	0.000322064	8.86453e-05	0.000541992	0.000180074	0.000525967	9.68117e-05	0.000228174	0.000285075	0.000238178	1.99897e-05	0.000347676	0.000200118	0	0.000351939
C468	3.01495e-05	0.000131422	2.04e-05	6.12e-05	0.000132387	7.51117e-05		8.12092e-05	0.000120768	8.1e-05	5.05474e-05	0.000112472	9.11e-05	0.00010927	5.02e-05	0.00011653	0.000142776	0.000120751	0.000183623	0.000194254	6.07e-05	5.02e-05	0.00012141		C468	6.0975e-06	4.56564e-05	5.88829e-06	0	3.73603e-05	1.59883e-05	3.41583e-05	0	4.14183e-05	6.76643e-05	4.56393e-05	0.000108511	0.000119142	0	0	4.62983e-05
A469	6.01618e-05	0.000192477	6.15e-05	4.09e-05	0.000101974	9.14026e-05		0.000122223	0.00015048	4.07e-05	5.07614e-05	0.000113924	9.13e-05	7.3e-05	0.000150408	8.17e-05	0.000132699	6.03e-05	5.1e-05	0.000112409	0.000131767	0.00018058	2.03e-05		A469	3.08207e-05	5.90775e-05	0	0	2.25214e-05	0	0	5.90054e-05	0	4.12964e-05	0	0	2.10064e-05	4.03644e-05	8.91774e-05	0
T469	3.00809e-05	2.03e-05	5.12e-05	2.04e-05	3.06e-05	3.05162e-05		3.05558e-05	7.0224e-05	2.03e-05	4.06091e-05	4.14e-05	4.06e-05	3.65e-05	1e-05	3.5e-05	3.06e-05	3.01e-05	4.08e-05	8.18e-05	4.05e-05	3.01e-05	6.08e-05		T469	3.96267e-08	3.97078e-05	0	1.0093e-05	1.08838e-05	1.00838e-05	5.98382e-06	0	4.48382e-06	8.38165e-08	0	1.02838e-05	5.12838e-05	9.98382e-06	0	3.02838e-05
C469	2.00539e-05	0	0.000143454	2.04e-05	1.02e-05	3.88216e-05		3.05558e-05	4.0128e-05	4.07e-05	1.01523e-05	3.11e-05	0	1.22e-05	1e-05	0	5.1e-05	1e-05	0	0	1.01e-05	3.01e-05	0		C469	0	1.30642e-06	1.87841e-06	0	0	0	0	0	0	1.21784e-05	0	0	0	0	0	0
A470	0.000140476	0.000111741	6.17e-05	0.000195152	0.000132782	0.00012837		4.36433e-05	6.02597e-05	0.000144282	1.03095e-05	9.54e-05	8.14e-05	4.88e-05	5.02e-05	5.86e-05	0.000133343	4.03e-05	0.000102509	9.24e-05	4.07e-05	3.01e-05	1.02e-05		A470	0	0	1.59118e-05	0	0	0	0	0	0	4.97276e-06	0	0	0	0	0	0
T470	4.01361e-05	7.11e-05	0.000154173	8.22e-05	0.000142996	9.8121e-05		9.81975e-05	0.000120519	0.000103059	0.000164952	0.000105974	9.16e-05	0.000170901	9.04e-05	0.000164002	0.000153857	0.00013084	0.000133262	0.000123143	0.000101853	7.03e-05	0.00011203		T470	7.65175e-08	2.23984e-05	4.93799e-06	6.68308e-05	7.85299e-06	0	7.278e-05	0	6.5881e-05	5.5736e-05	3.2719e-05	3.5141e-05	2.5022e-05	3.73199e-06	0	1.3909e-05
G470	2.0068e-05	2.03e-05	0.000246678	0	2.04e-05	6.14892e-05		1.09108e-05	2.00866e-05	0	3.09285e-05	0	0	1.22e-05	0	0	0	0	0	1.03e-05	0	1e-05	2.04e-05		G470	0	0	0	0	0	0	0	0	0	0	0	0	0	0	0	0
A471	5.01414e-05	9.16e-05	1.02e-05	0.000113225	0.000102458	7.35249e-05		3.31888e-05	8.02947e-05	3.1e-05	3.10392e-05	8.5e-05	3.07e-05	0.00011029	5.02e-05	9.42e-05	0.000123679	6.03e-05	0.000103334	0.000124368	9.22e-05	2.01e-05	4.09e-05		A471	0	6.7698e-06	0	0	1.14751e-05	0	3.67651e-05	0	2.06751e-05	5.01541e-05	0	2.98091e-05	5.08431e-05	1.86751e-05	0	0
T471	0.000110311	6.1e-05	0	9.26e-05	0.000102458	7.32738e-05		0.000199133	0.000110405	0.000155012	0.00011381	0.000159395	0.000153467	0.000147053	0.000130447	0.000141331	0.000103066	0.000180988	8.27e-05	4.15e-05	0.000112644	5.02e-05	0.000173958		T471	0.000125859	3.71314e-05	8.17382e-05	4.05366e-05	8.61212e-05	8.01932e-05	7.37792e-05	5.71732e-05	6.80572e-05	2.97922e-05	0.000107714	9.42618e-06	0	3.93702e-05	0	0.000100684
G471	0	0	1.02e-05	0	0	2.04e-06		4.42517e-05	1.00368e-05	2.07e-05	3.10392e-05	3.19e-05	2.05e-05	2.45e-05	1e-05	0	4.12e-05	2.01e-05	4.13e-05	1.04e-05	1.02e-05	1e-05	1.02e-05		G471	4.22117e-05	7.99684e-06	1.866e-05	2.89992e-05	2.986e-05	1.846e-05	2.246e-05	7.96e-06	0	3.916e-05	1.806e-05	3.926e-05	8.36e-06	8.16e-06	7.96e-06	8.16e-06
A472	6.02585e-05	4.06e-05	2.05e-05	1.03e-05	9.21e-05	4.47517e-05		9.91004e-05	6.02658e-05	6.19e-05	3.09809e-05	1.06e-05	0.000132734	7.34e-05	9.04e-05	5.88e-05	8.23e-05	4.03e-05	5.15e-05	1.04e-05	0	2.01e-05	6.13e-05		A472	5.43487e-05	1.55141e-05	1.71483e-05	0	0	8.79823e-05	2.86483e-05	4.56483e-05	1.40483e-05	3.75483e-05	0	6.7483e-06	0	0	0	1.65483e-05
G472	1.00431e-05	2.03e-05	5.11e-05	4.1e-05	4.09e-05	3.26686e-05		4.40446e-05	0	1.03e-05	2.06539e-05	0	2.04e-05	6.12e-05	3.01e-05	4.7e-05	4.11e-05	4.03e-05	3.09e-05	5.18e-05	3.07e-05	1e-05	4.09e-05		G472	1.1376e-05	0	0	0	0	0	2.85314e-05	0	1.43314e-05	8.43138e-06	7.63138e-06	0	1.91314e-05	0	0	8.23138e-06
C472	0.000180776	0.000243682	0.00010228	0.000143628	0.000235284	0.00018113		0.000363368	0.000391728	0.000371417	0.000258174	0.000360471	0.000479886	0.000403783	0.000261146	0.000305638	0.000257162	0.000251585	0.000505165	0.000352335	0.00035791	0.000361515	0.000388104		C472	0.000182238	0.000210598	0.000190287	7.70439e-05	0.000179341	0.000298756	0.000222653	8.00161e-05	0.000124508	7.60321e-05	7.04551e-05	0.000324035	0.000171205	0.00017678	0.000180385	0.000206974
T473	6.0192e-05	3.04e-05	7.13e-05	4.09e-05	7.15e-05	5.48584e-05		2.17332e-05	5.01771e-05	1.03e-05	0.000175466	3.18e-05	6.17e-05	4.93e-05	3.01e-05	3.55e-05	6.22e-05	8.04e-05	4.17e-05	8.37e-05	5.14e-05	9.03e-05	0.000123351		T473	0	0	0	0.000120607	0	6.8416e-06	0	0	0	7.3416e-06	2.55416e-05	0	2.88416e-05	0	3.54416e-05	6.84926e-05
G473	0.000130416	0.000152147	0.000162953	0.000133079	7.15e-05	0.000130019		0.000325998	0.000301063	0.000257517	0.000144501	0.000169456	0.000195325	0.000246381	0.00020059	0.000224655	0.000207295	0.000110504	0.000104156	0.000230309	0.000246878	0.000240802	0.00014391		G473	0.000195979	0.000171044	0.000127498	1.44822e-05	3.9437e-05	6.5306e-05	0.000116362	7.0571e-05	9.4636e-05	7.7276e-05	0	0	0.00010029	0.000116859	0.000110783	1.3891e-05
C473	2.0064e-05	5.07e-05	3.06e-05	7.17e-05	2.04e-05	3.86928e-05		1.08666e-05	6.02126e-05	4.12e-05	2.0643e-05	1.06e-05	1.03e-05	3.7e-05	3.01e-05	2.36e-05	0.000103647	7.03e-05	5.21e-05	5.23e-05	2.06e-05	1e-05	1.03e-05		C473	0	2.15197e-05	2.5072e-06	0	0	0	0	0	0	6.49542e-05	3.16072e-05	1.34072e-05	1.36072e-05	0	0	0
A474	0.000140994	1.02e-05	0.000122413	4.11e-05	6.15e-05	7.52414e-05		2.15654e-05	6.04601e-05	0.000134388	6.21137e-05	7.45e-05	3.09e-05	1.23e-05	3.02e-05	5.93e-05	2.08e-05	0.000100736	4.17e-05	4.2e-05	1.03e-05	3.02e-05	4.13e-05		A474	0	0	5.91466e-05	0	0	0	0	0	0	0	2.54946e-05	0	0	0	0	0
T474	5.0355e-05	2.04e-05	1.02e-05	5.14e-05	1.02e-05	2.8511e-05		9.70445e-05	0.000141074	2.07e-05	5.17614e-05	8.51e-05	4.13e-05	2.47e-05	8.05e-05	3.56e-05	5.2e-05	0.000100736	3.13e-05	7.35e-05	2.06e-05	7.04e-05	4.13e-05		T474	6.85335e-05	0.000112563	0	2.32504e-05	5.6589e-05	1.2789e-05	0	5.1989e-05	7.089e-06	2.3489e-05	7.2225e-05	2.789e-06	4.4989e-05	0	4.1889e-05	1.2789e-05
C474	0	4.07e-05	0.000234624	0	0	5.50648e-05		0	1.00767e-05	0	1.03523e-05	3.19e-05	1.03e-05	0	0	1.19e-05	2.08e-05	0	0	0	0	0	1.03e-05		C474	0	0	0	0	0	0	0	0	0	0	0	0	0	0	0	0
A475	4.00962e-05	5.1e-05	7.15e-05	5.14e-05	3.08e-05	4.89592e-05		3.20325e-05	3.00966e-05	5.18e-05	3.11052e-05	0	6.22e-05	3.72e-05	6.02e-05	4.75e-05	8.34e-05	8.04e-05	5.23e-05	0.000115651	3.1e-05	1e-05	5.17e-05		A475	0	0	2.84075e-06	0	0	1.32408e-05	0	1.12408e-05	0	3.44408e-05	3.14408e-05	3.34075e-06	6.66918e-05	0	0	2.74075e-06
T475	5.01203e-05	7.13e-05	5.11e-05	7.2e-05	7.19e-05	6.32841e-05		4.27099e-05	0.000110354	3.11e-05	3.11052e-05	7.47e-05	5.18e-05	1.24e-05	4.01e-05	4.75e-05	9.38e-05	3.01e-05	8.37e-05	9.46e-05	1.03e-05	8.02e-05	4.14e-05		T475	0	4.70702e-05	0	0	1.14159e-05	0	0	0	0	3.05159e-05	0	2.04159e-05	3.13159e-05	0	1.69159e-05	0
C475	0	0	2.04e-05	1.03e-05	2.05e-05	1.024e-05		0	0	0	0	0	0	2.48e-05	0	0	1.04e-05	0	0	0	0	1e-05	0		C475	0	0	0	0	0	0	1.456e-05	0	0	1.6e-07	0	0	0	0	0	0
A476	0.000130453	0.000132271	0.000101552	0.000143971	0.000112624	0.000124174		0.000233722	0.000110415	5.17e-05	5.17582e-05	7.45e-05	6.2e-05	9.9e-05	0.000100324	5.93e-05	0.000114613	5.02e-05	0.000156462	0.00012593	9.28e-05	5.02e-05	0.000103309		A476	0.000109548	0	0	0	0	0	0	0	0	0	0	3.22879e-05	1.75587e-06	0	0	0
G476	3.01045e-05	4.07e-05	0.00031481	7.2e-05	5.12e-05	0.000101763		4.24949e-05	0	2.07e-05	1.03516e-05	3.19e-05	5.17e-05	6.19e-05	1e-05	3.56e-05	5.21e-05	1e-05	3.13e-05	4.2e-05	3.09e-05	3.01e-05	1.03e-05		G476	0	0	0	0	0	0	0	0	0	0	0	0	0	0	0	0
C476	0.000190662	0.00015262	8.12e-05	6.17e-05	0.000112624	0.000119761		0.000127485	0.000180679	0.000165335	9.31648e-05	9.57e-05	0.000155039	0.000185669	0.000140454	0.000142376	0.00016671	0.000140629	0.000166893	0.000146918	0.000113371	0.000180571	0.000196287		C476	7.7235e-06	6.09182e-05	4.55739e-05	0	0	3.52779e-05	6.59079e-05	2.06929e-05	2.26149e-05	4.69489e-05	2.08679e-05	4.71319e-05	2.71569e-05	0	6.08099e-05	7.65259e-05
T477	7.03489e-05	5.1e-05	9.13e-05	2.07e-05	7.22e-05	6.11098e-05		3.16232e-05	6.02876e-05	0.000176501	4.15554e-05	9.62e-05	9.35e-05	7.46e-05	0.000140684	3.59e-05	4.2e-05	0.000110773	7.37e-05	5.3e-05	0.000155419	7.03e-05	8.29e-05		T477	0	0	0.000115391	0	3.50902e-05	3.23902e-05	1.34902e-05	7.95742e-05	0	0	4.96632e-05	1.25902e-05	0	9.43092e-05	9.19021e-06	2.17902e-05
G477	0.000211047	0.000142883	0.000385415	0.000113922	8.25e-05	0.000187153		0.000242445	0.00029139	0.00021803	0.000166222	0.000245897	0.000270051	0.000211364	0.000200977	0.000155447	0.000147119	0.000171195	0.000136927	0.000265229	0.000176142	0.000150695	0.000196969		G477	5.52913e-05	0.000104237	3.08766e-05	0	5.87436e-05	8.28976e-05	2.42106e-05	1.38236e-05	0	0	0	0	7.80756e-05	0	0	9.81564e-06
C477	0	6.12e-05	1.01e-05	8.29e-05	6.19e-05	4.322e-05		3.16232e-05	0	0.000103824	4.15554e-05	7.48e-05	4.15e-05	7.46e-05	2.01e-05	9.57e-05	7.36e-05	6.04e-05	3.16e-05	9.55e-05	6.22e-05	1e-05	3.11e-05		C477	0	0	6.0604e-05	0	3.158e-05	0	3.138e-05	0	5.248e-05	3.038e-05	1.718e-05	0	5.228e-05	1.898e-05	0	0
A478	4.0224e-05	2.03e-05	0.000143056	7.18e-05	2.04e-05	5.9156e-05		5.18958e-05	4.02063e-05	6.2e-05	4.13805e-05	4.24e-05	5.17e-05	2.48e-05	2.01e-05	2.37e-05	3.12e-05	5.03e-05	0	8.38e-05	6.19e-05	1e-05	0.000103152		A478	0	0	2.84399e-06	0	0	0	0	0	0	0	0	0	2.4644e-05	2.74399e-06	0	4.3996e-05
G478	2.0112e-05	1.02e-05	4.09e-05	3.08e-05	3.07e-05	2.65424e-05		2.07583e-05	0	0	4.13805e-05	2.12e-05	0	2.48e-05	1e-05	0	3.12e-05	1.01e-05	6.24e-05	3.14e-05	2.06e-05	5.02e-05	1.03e-05		G478	0	0	0	1.4838e-05	0	0	0	0	0	4.6576e-06	0	3.58576e-05	4.8576e-06	0	2.36576e-05	0
C478	0.000120672	0.000904821	3.07e-05	0.000697736	0.0009299	0.000536766		0.000217962	0.000301547	0.00137387	0.00088968	0.000922539	0.000982156	0.000928678	0.000241085	0.000745633	0.0006546	9.05e-05	0.000707721	0.000910995	0.00110306	0.00016067	0.00110373		C478	0	0	0.000837102	0.000352914	0.000385773	0.00044539	0.000391912	0	0.000208867	0.000117834	0	0.000170955	0.000374229	0.000566293	0	0.000566964
A479	9.03179e-05	7.1e-05	6.09e-05	6.15e-05	6.12e-05	6.89836e-05		5.13199e-05	4.01445e-05	1.03e-05	4.13048e-05	9.51e-05	5.16e-05	2.47e-05	5.02e-05	7.1e-05	5.19e-05	9.05e-05	4.15e-05	6.27e-05	0.0001132	6.02e-05	9.27e-05		A479	0	0	0	0	2.61164e-05	0	0	0	2.01642e-06	0	2.15164e-05	0	0	4.42164e-05	0	2.37164e-05
G479	1.00353e-05	5.07e-05	0.00010155	7.17e-05	4.08e-05	5.49571e-05		4.1056e-05	1.00361e-05	2.06e-05	5.1631e-05	8.45e-05	2.06e-05	6.18e-05	4.01e-05	8.28e-05	4.15e-05	4.02e-05	6.23e-05	7.31e-05	8.23e-05	1e-05	5.15e-05		G479	0	0	0	0	2.95429e-05	0	6.84294e-06	0	2.78429e-05	0	0	7.34294e-06	1.81429e-05	2.73429e-05	0	0
C479	0.000190671	0.000253408	3.05e-05	0.000256197	0.000306076	0.00020737		0.000369504	0.000270976	0.000401644	0.000433701	0.000433047	0.000340599	0.000370682	0.000160591	0.000414039	0.000207456	0.00016087	0.000270043	0.000271606	0.000308728	0.000240865	0.000535619		C479	0.000162133	6.36051e-05	0.000194274	0.00022633	0.000225677	0.000133229	0.000163312	0	0.000206669	8.55675e-08	0	6.26726e-05	6.42356e-05	0.000101358	3.34946e-05	0.000328249
A480	4.0132e-05	0.000134655	0.000122426	4.21e-05	6.3e-05	8.04626e-05		7.16831e-05	9.03379e-05	8.44e-05	9.45994e-05	6.51e-05	6.32e-05	8.8e-05	9.03e-05	3.63e-05	7.43e-05	3.01e-05	9.63e-05	7.56e-05	8.39e-05	0.00012037	0.000115572		A480	0	9.87526e-06	3.93739e-06	1.41368e-05	0	0	7.53739e-06	9.83739e-06	0	0	0	1.58374e-05	0	3.43739e-06	3.99074e-05	3.51094e-05
T480	0.000120396	2.07e-05	3.06e-05	5.26e-05	6.3e-05	5.74592e-05		9.2164e-05	8.03003e-05	0.000105556	8.40884e-05	5.42e-05	8.42e-05	6.28e-05	5.02e-05	2.42e-05	1.06e-05	8.03e-05	6.42e-05	0.000151168	6.29e-05	6.02e-05	9.46e-05		T480	3.47048e-05	2.28411e-05	4.80968e-05	2.66292e-05	0	2.67408e-05	5.34078e-06	0	0	0	2.28408e-05	6.74078e-06	9.37088e-05	5.44078e-06	2.74078e-06	3.71408e-05
C480	1.0033e-05	0	2.04e-05	1.05e-05	3.15e-05	1.44866e-05		0	2.00751e-05	7.39e-05	0	0	0	0	2.01e-05	3.63e-05	0	1e-05	9.63e-05	4.32e-05	3.14e-05	1e-05	1.05e-05		C480	0	5.58848e-06	5.94134e-05	0	0	0	0	5.6134e-06	2.18134e-05	0	0	8.18134e-05	2.87134e-05	1.69134e-05	0	0
T481	9.0475e-05	6.36e-05	5.08e-05	0.00010784	4.3e-05	7.1143e-05		4.10901e-05	9.05888e-05	7.58e-05	3.21723e-05	4.46e-05	5.37e-05	6.4e-05	5.03e-05	8.62e-05	6.49e-05	6.06e-05	8.78e-05	6.66e-05	3.2e-05	9.06e-05	8.57e-05		T481	0	1.94458e-05	4.657e-06	0	0	0	0	0	1.5057e-05	0	0	1.6657e-05	0	0	1.9457e-05	1.4557e-05
G481	0.000201056	0.000233048	4.07e-05	7.55e-05	0.000193523	0.000148765		0.000359539	0.000271766	0.000324886	0.000257378	0.000234391	0.000182519	0.000256177	0.000191101	0.000184629	0.000324317	0.000161525	0.000307142	0.000221926	0.000245711	0.00023161	0.000149919		G481	0.000210773	0.000123001	0.000176121	0.000108613	8.56257e-05	3.37537e-05	0.000107412	4.23357e-05	3.58637e-05	0.000175552	1.27597e-05	0.000158377	7.31607e-05	9.69457e-05	8.28447e-05	1.15369e-06
C481	3.01583e-05	7.42e-05	0.000172826	8.63e-05	0.000182772	0.000109251		7.19077e-05	1.00654e-05	7.58e-05	8.57927e-05	7.81e-05	0.000118101	0.000102471	3.02e-05	6.15e-05	8.65e-05	9.09e-05	0.000142602	0.000122059	7.48e-05	1.01e-05	8.57e-05		C481	0	0	0	0	0	8.84973e-06	0	0	0	0	0	3.33507e-05	1.28077e-05	0	0	0
A482	5.02079e-05	0.000106064	8.13e-05	8.69e-05	0.000108378	8.657e-05		4.06281e-05	8.03568e-05	9.78e-05	0.000139647	8.95e-05	3.22e-05	3.84e-05	9.04e-05	2.47e-05	8.69e-05	0.000100608	0.000143391	5.59e-05	0.000128401	2.01e-05	4.29e-05		A482	0	0	1.123e-05	5.30768e-05	2.93003e-06	0	0	3.83003e-06	0	3.30028e-07	1.4038e-05	5.6821e-05	0	4.1831e-05	0	0
G482	1.00416e-05	1.06e-05	1.02e-05	3.26e-05	6.5e-05	2.56883e-05		2.03141e-05	3.01338e-05	2.17e-05	3.22262e-05	1.12e-05	0	2.56e-05	0	3.71e-05	6.52e-05	0	1.1e-05	2.24e-05	4.28e-05	1e-05	3.22e-05		G482	0	4.44548e-06	0	6.53787e-06	0	0	0	0	1.14117e-05	3.95117e-05	0	0	0	1.71117e-05	0	6.51169e-06
C482	0.000100416	0.000392436	0.00016257	0.000477918	0.000368484	0.000300365		0.000335182	0.000231026	0.000488902	0.000322262	0.00051449	0.000504958	0.000486849	0.000190819	0.000444845	0.000336719	0.000120729	0.000286783	0.000234823	0.000363804	0.000130518	0.000386067		C482	3.48172e-05	0	0.000188537	2.18971e-05	0.000214125	0.000204593	0.000186484	0	0.00014448	3.63543e-05	0	0	0	6.34393e-05	0	8.57023e-05
T483	0.000131293	0.000118911	0.000203645	7.75e-05	4.43e-05	0.00011513		0.000100616	7.05695e-05	6.67e-05	0.000109467	9.18e-05	7.64e-05	0.000104256	0.000120942	0.000100227	8.85e-05	4.04e-05	7.89e-05	4.58e-05	5.43e-05	8.06e-05	0.000152462		T483	0	0	0	0	0	0	0	5.81215e-06	0	0	0	0	0	0	0	3.73322e-05
G483	0.000161592	0.000183772	0.000264739	0.000154919	0.000144028	0.00018181		0.000301847	0.000342766	0.000533487	0.000503547	0.000252519	0.000294712	0.000182448	0.000231806	0.000112755	0.000265416	0.000212046	0.000326934	0.000240633	0.000173819	0.000201424	0.000304925		G483	0.000120037	0.000160956	0.000351677	0.000321737	7.07091e-05	0.000112902	6.38064e-07	4.99961e-05	0	8.36061e-05	3.02361e-05	0.000145124	5.88231e-05	0	1.96141e-05	0.000123115
C483	1.00995e-05	0.000594556	0	0.000652872	0.00105251	0.000462008		0.000150924	3.02441e-05	0.000622402	0.000678693	0.000585386	0.000862304	0.000625538	4.03e-05	0.000626417	0.000464478	4.04e-05	0.000710235	0.000641687	0.000467137	4.03e-05	0.000784092		C483	0	0	0.000160394	0.000216685	0.000123378	0.000400296	0.00016353	0	0.000164409	2.4695e-06	0	0.000248227	0.000179679	5.1285e-06	0	0.000322084
A484	7.0186e-05	6.55e-05	3.06e-05	8.92e-05	0.000122897	7.56766e-05		6.02017e-05	5.01374e-05	0.000101107	5.5284e-05	0.000139679	4.41e-05	5.26e-05	5.01e-05	0.00013844	0.000144584	0.000110461	0.000113546	3.47e-05	8.75e-05	2.01e-05	4.39e-05		A484	0	0	2.54304e-05	0	6.40024e-05	0	0	0	6.27634e-05	6.89074e-05	3.47844e-05	3.78694e-05	0	1.18234e-05	0	0
T484	8.02126e-05	7.64e-05	0.000244826	5.58e-05	3.35e-05	9.81477e-05		0.000150504	0.000110302	5.62e-05	3.31704e-05	4.66e-05	8.82e-05	2.63e-05	0.000140375	7.55e-05	8.9e-05	0.000170712	6.81e-05	4.62e-05	1.09e-05	4.01e-05	9.89e-05		T484	5.23565e-05	1.21545e-05	0	0	0	0	0	4.22273e-05	0	0	7.25643e-05	0	0	0	0	7.52287e-07
G484	1.00266e-05	0	0.000163217	1.12e-05	0	3.68887e-05		1.00336e-05	0	1.12e-05	2.21136e-05	0	0	1.32e-05	0	0	3.34e-05	2.01e-05	0	2.31e-05	2.19e-05	1e-05	3.3e-05		G484	0	0	0	0	0	0	0	0	0	0	0	0	0	0	0	0
A485	3.02997e-05	7.62e-05	9.19e-05	0.000188847	0.000144861	0.000106422		0.000110493	0.000100803	0.000123041	0.00014333	6.95e-05	9.89e-05	7.87e-05	0.000141062	0.000138059	0.000132963	7.06e-05	0.000158112	0.000138087	0.000119921	5.03e-05	9.86e-05		A485	4.07127e-06	0	1.66195e-05	3.69081e-05	0	0	0	3.46405e-05	3.16375e-05	2.65415e-05	0	5.16905e-05	3.16655e-05	1.34995e-05	0	0
T485	0.000171698	0.000206803	6.13e-05	0.000277716	0.000334295	0.000210362		0.000351568	0.00028225	0.00020134	0.000297685	0.000278142	0.000230686	0.000328024	0.000211593	0.000288669	0.000243765	0.000181517	0.000271049	0.000276173	0.000174431	0.000161061	0.000240964		T485	0.000141206	7.18871e-05	0	8.73223e-05	6.77796e-05	2.03236e-05	0.000117662	1.23058e-06	7.83066e-05	3.34026e-05	0	6.06866e-05	6.58106e-05	0	0	3.06016e-05
G485	1.00999e-05	1.09e-05	4.09e-05	1.11e-05	1.11e-05	1.682e-05		1.00448e-05	0	0	0	0	2.2e-05	1.31e-05	1.01e-05	0	4.43e-05	1.01e-05	0	0	0	0	0		G485	0	0	0	0	0	5.18002e-06	0	0	0	2.748e-05	0	0	0	0	0	0
A486	0.000190409	0.000177291	8.2e-05	0.000113608	9.13e-05	0.000130922		0.000310948	0.000280795	0.00019427	8.97626e-05	0.000118866	0.000167454	0.000186515	0.000200473	0.000242511	0.000226104	0.000200749	0.000173649	0.000224669	0.000210054	0.000290683	7.8e-05		A486	0.000180027	0.000149873	6.33483e-05	0	0	3.65323e-05	5.55933e-05	6.95513e-05	0.000111589	9.51823e-05	6.98273e-05	4.27273e-05	9.37473e-05	7.91323e-05	0.000159761	0
T486	4.00862e-05	0.000121888	9.23e-05	0.000124969	6.85e-05	8.95486e-05		2.00612e-05	8.0227e-05	9.14e-05	7.85423e-05	0.00010698	0.000111636	0.000146547	3.01e-05	0.00010211	0.000124357	6.02e-05	5.79e-05	0.000118247	0.000143721	4.01e-05	0.000100223		T486	0	0	1.85136e-06	0	1.74314e-05	2.20874e-05	5.69984e-05	0	1.25614e-05	3.48084e-05	0	0	2.86984e-05	5.41724e-05	0	1.06744e-05
C486	2.00431e-05	1.11e-05	0	2.27e-05	1.14e-05	1.30486e-05		2.00612e-05	1.00284e-05	1.14e-05	3.3661e-05	2.38e-05	1.12e-05	1.33e-05	3.01e-05	0	1.13e-05	0	4.63e-05	1.18e-05	0	0	4.45e-05		C486	7.01257e-06	0	0	2.06123e-05	1.07514e-05	0	2.51381e-07	1.70514e-05	0	0	0	3.32514e-05	0	0	0	3.14514e-05
T487	0.000100151	5.54e-05	0.000102837	7.94e-05	9.11e-05	8.57776e-05		0.00015028	0.000140212	6.85e-05	5.61344e-05	0.00016604	5.58e-05	0.000146405	8.01e-05	5.09e-05	0.000124021	0.000100247	5.78e-05	7.07e-05	4.42e-05	0.000130211	0.000178017		T487	6.45019e-05	5.44341e-05	0	0	8.02624e-05	0	6.06274e-05	0	0	3.82434e-05	1.44694e-05	0	0	0	4.44334e-05	9.22394e-05
G487	0.000150227	0.000155042	0.000113121	0.000136073	0.000125211	0.000135935		0.00029054	0.000290439	0.000467908	0.000303126	0.00028464	0.000256674	0.000226262	0.000320558	0.000178153	9.02e-05	0.000190469	0.000184807	0.000224033	0.000165687	0.000280454	0.000322656		G487	0.000154606	0.000154504	0.000331973	0.000167191	0.000148705	0.000120739	9.03272e-05	0.000184623	4.22182e-05	0	5.45342e-05	4.88722e-05	8.80982e-05	2.97522e-05	0.000144519	0.000186721
C487	2.00302e-05	1.11e-05	0	6.8e-05	4.55e-05	2.8926e-05		2.00373e-05	3.00454e-05	1.14e-05	2.24537e-05	5.93e-05	5.58e-05	0	5.01e-05	6.36e-05	0	1e-05	2.31e-05	5.9e-05	7.73e-05	4.01e-05	0.000100135		C487	0	1.11932e-06	0	0	3.0374e-05	2.6874e-05	0	2.1174e-05	3.4674e-05	0	0	0	3.0074e-05	4.8374e-05	1.1174e-05	7.1209e-05
T488	0	1.12e-05	5.13e-05	1.15e-05	3.47e-05	2.174e-05		4.01877e-05	3.01096e-05	1.16e-05	7.97103e-05	2.42e-05	2.26e-05	0	3.01e-05	1.29e-05	6.88e-05	0	1.18e-05	1.2e-05	3.36e-05	5.02e-05	5.64e-05		T488	1.84477e-05	8.3696e-06	0	5.79703e-05	2.46e-06	8.6e-07	0	8.36e-06	0	4.706e-05	0	0	0	1.186e-05	2.846e-05	3.466e-05
G488	0.000170494	0.000190928	4.11e-05	0.000196024	0.000173643	0.000154438		0.000251173	0.000351279	0.000568676	0.000330228	0.000436268	0.000396336	0.000350811	0.000280981	0.000296954	0.000183575	0.000291648	0.000365398	0.000301161	0.000436349	0.000351201	0.000304778		G488	9.67351e-05	0.000196841	0.000414238	0.000175791	0.00028183	0.000241898	0.000196373	0.000126543	0.000142516	2.91371e-05	0.00013721	0.00021096	0.000146723	0.000281911	0.000196763	0.00015034
C488	2.00582e-05	0.000202159	0.000174468	0.000242148	0.000162067	0.00016018		8.03754e-05	4.01461e-05	0.000162479	0.000182195	0.000193897	0.00014721	0.000175405	3.01e-05	0.000103288	0.000126208	4.02e-05	0.000365398	0.000252975	6.71e-05	6.02e-05	0.000158033		C488	0	0	2.29897e-06	2.2015e-05	3.3717e-05	0	1.5225e-05	0	0	0	0	0.000205218	9.2795e-05	0	0	0
A489	8.01467e-05	5.65e-05	5.13e-05	2.33e-05	2.34e-05	4.69293e-05		0.000130375	0.000140279	0.000210386	0.000126015	3.67e-05	0.000113987	5.42e-05	0.000110296	0.000130161	6.94e-05	0.000100435	4.77e-05	7.32e-05	6.76e-05	0.000100299	7.95e-05		A489	8.34461e-05	9.33498e-05	0.000163457	7.90859e-05	0	6.70577e-05	7.27067e-06	6.33667e-05	8.32317e-05	2.24707e-05	5.35057e-05	7.70666e-07	2.62707e-05	2.06707e-05	5.33697e-05	3.25707e-05
T489	3.0055e-05	5.65e-05	0.000174332	0.000186287	9.35e-05	0.000108135		2.00578e-05	6.01196e-05	5.84e-05	3.43678e-05	1.22e-05	6.84e-05	1.35e-05	0	9.11e-05	0.000115666	3.01e-05	2.38e-05	0.000134187	2.25e-05	1e-05	3.41e-05		T489	0	0	0	0	0	0	0	0	0	7.5312e-06	0	0	2.60522e-05	0	0	0
C489	2.00367e-05	0	9.23e-05	1.16e-05	2.34e-05	2.94673e-05		1.00289e-05	1.00199e-05	0	1.14559e-05	1.22e-05	1.14e-05	2.71e-05	0	0	1.16e-05	3.01e-05	0	0	0	1e-05	0		C489	0	0	0	0	0	0	0	0	0	0	6.32667e-07	0	0	0	0	0
A490	5.01761e-05	4.52e-05	2.06e-05	2.33e-05	3.5e-05	3.48552e-05		4.01445e-05	4.01425e-05	3.5e-05	3.43749e-05	4.89e-05	2.28e-05	1.35e-05	0	6.49e-05	8.07e-05	1e-05	5.94e-05	4.86e-05	5.63e-05	2.01e-05	3.41e-05		A490	5.2893e-06	5.28728e-06	1.44776e-07	0	1.40448e-05	0	0	0	3.00448e-05	4.58448e-05	0	2.45448e-05	1.37448e-05	2.14448e-05	0	0
T490	8.02818e-05	0.000169365	2.06e-05	8.14e-05	6.99e-05	8.43094e-05		0.000230831	0.000210748	0.00023338	0.000263541	0.000134338	0.000170981	0.000162591	0.000220773	7.79e-05	0.00011528	0.000110543	3.56e-05	0.0001216	5.63e-05	0.000120376	9.08e-05		T490	0.000146522	0.000126439	0.000149071	0.000179231	5.00286e-05	8.66716e-05	7.82816e-05	0.000136464	0	3.09706e-05	2.62336e-05	0	3.72906e-05	0	3.60666e-05	6.49064e-06
G490	0	1.13e-05	1.03e-05	3.49e-05	2.33e-05	1.596e-05		2.00723e-05	2.00713e-05	1.17e-05	1.14583e-05	0	0	1.35e-05	1e-05	1.3e-05	2.31e-05	4.02e-05	0	1.22e-05	0	0	0		G490	4.11226e-06	4.11125e-06	0	0	0	0	0	0	0	7.14e-06	2.424e-05	0	0	0	0	0
A491	1.00419e-05	1.12e-05	4.12e-05	3.46e-05	0	1.94084e-05		3.01172e-05	4.01659e-05	3.46e-05	2.27074e-05	2.41e-05	0	1.34e-05	2.01e-05	2.57e-05	4.57e-05	0	3.52e-05	1.2e-05	2.23e-05	2.01e-05	1.12e-05		A491	1.07088e-05	2.07575e-05	1.51916e-05	3.29903e-06	4.69163e-06	0	0	6.91625e-07	6.29163e-06	2.62916e-05	0	1.57916e-05	0	2.89163e-06	6.91625e-07	0
G491	2.00837e-05	0.00015632	0.000113347	8.08e-05	5.77e-05	8.56501e-05		1.00391e-05	1.00415e-05	6.93e-05	3.40611e-05	4.82e-05	0.000101546	0.00010725	2.01e-05	0.000102999	0.000182828	1.01e-05	5.87e-05	0.000131931	5.57e-05	0	7.87e-05		G491	0	0	0	0	0	1.58959e-05	2.15999e-05	0	1.73489e-05	9.71779e-05	0	0	4.62809e-05	0	0	0
C491	0.000130544	0.000122823	1.03e-05	0.000196128	0.00013845	0.000119649		0.000230898	0.00034141	0.000427089	0.000238428	0.000337053	0.000361052	0.000254719	0.000220881	0.000167373	0.000125694	0.000180957	0.000293393	0.000155918	0.000122578	0.00025083	0.000123641		C491	0.000111249	0.000221761	0.00030744	0.000118779	0.000217404	0.000241403	0.00013507	0.000101232	4.77239e-05	6.04493e-06	6.13079e-05	0.000173744	3.62689e-05	2.92893e-06	0.000131181	3.99193e-06
A492	0.000160395	0.000201819	0.000102815	9.28e-05	9.31e-05	0.000130186		0.000160601	0.000230713	0.000162373	7.96713e-05	0.000278504	0.000226329	0.00012102	0.000100293	0.000233007	0.000161062	0.000170738	0.000130088	0.000205881	0.000178917	0.00021063	0.000180507		A492	3.04149e-05	0.000100527	3.21873e-05	0	0.000148318	9.61433e-05	0	0	0.000102821	3.08763e-05	4.05523e-05	0	7.56953e-05	4.87313e-05	8.04443e-05	5.03213e-05
T492	1.00247e-05	7.85e-05	6.17e-05	0.000139193	0.000128005	8.34845e-05		4.01502e-05	2.0062e-05	4.64e-05	6.82897e-05	6.05e-05	4.53e-05	6.72e-05	2.01e-05	0.000103559	0.00020708	2.01e-05	9.46e-05	0.000108996	2.24e-05	2.01e-05	3.38e-05		T492	0	0	0	0	0	0	0	0	2.00745e-05	0.000123595	0	1.11155e-05	2.55115e-05	0	0	0
C492	1.00247e-05	4.48e-05	0.000164504	3.48e-05	1.16e-05	5.31457e-05		2.00751e-05	0	2.32e-05	2.27632e-05	2.42e-05	2.26e-05	4.03e-05	1e-05	6.47e-05	0	0	3.55e-05	4.84e-05	0	1e-05	3.38e-05		C492	0	0	0	0	0	0	0	0	1.15543e-05	0	0	0	0	0	0	0
A493	0.000130251	6.65e-05	5.19e-05	0.000216251	0.000102664	0.000113513		9.01948e-05	6.0122e-05	6.86e-05	5.62658e-05	7.15e-05	5.59e-05	7.98e-05	8.01e-05	5.1e-05	5.65e-05	5.01e-05	6.95e-05	8.28e-05	8.84e-05	0.000140223	5.57e-05		A493	0	0	0	0	0	0	0	0	0	0	0	0	0	0	2.67097e-05	0
G493	3.0058e-05	5.54e-05	0.000176354	5.69e-05	6.84e-05	7.74224e-05		1.00216e-05	4.00814e-05	5.72e-05	4.50126e-05	3.57e-05	4.47e-05	0	0	8.92e-05	0.000112931	2e-05	8.11e-05	5.92e-05	3.31e-05	2e-05	0		G493	0	0	0	0	0	0	0	0	1.17776e-05	3.55086e-05	0	3.6776e-06	0	0	0	0
C493	0.000170329	0.00026599	0.000103738	0.000364212	0.00038784	0.000258422		0.000150325	0.000400814	0.000411687	0.000450126	0.000703042	0.000502934	0.000478883	0.000240438	0.000509515	0.000350085	0.000300664	0.000417082	0.000355042	0.000298247	0.000210334	0.000557376		C493	0	0.000142392	0.000153265	0.000191704	0.00044462	0.000244512	0.000220461	0	0.000251093	9.16633e-05	4.22423e-05	0.00015866	9.66203e-05	3.98253e-05	0	0.000298954
A494	0.000130301	8.49e-05	1.03e-05	0.000113259	0.000101038	8.79596e-05		7.02459e-05	0.000130353	8.86e-05	0.000158332	8.04e-05	6.08e-05	0.000230021	7.02e-05	4.14e-05	4.94e-05	0.00011044	9.2e-05	9.56e-05	0.000143111	7.02e-05	8.47e-05		A494	0	4.23937e-05	6.40401e-07	7.03723e-05	0	0	0.000142061	0	0	0	2.24804e-05	4.0404e-06	7.6404e-06	5.51514e-05	0	0
G494	5.01158e-05	0.00018192	1.03e-05	7.55e-05	0.000176817	9.89306e-05		2.00702e-05	3.00815e-05	0.000139198	6.08969e-05	6.7e-05	9.73e-05	0.00011501	0	0.000137971	0.000197575	5.02e-05	9.2e-05	0.000122914	0.000119259	4.01e-05	0.000108861		G494	0	0	4.02674e-05	0	0	0	1.60794e-05	0	3.90404e-05	9.86444e-05	0	0	2.39834e-05	2.03284e-05	0	9.93045e-06
C494	0.00019044	0.000218304	0.000851946	0.000163596	0.000164187	0.000317695		0.000361264	0.000360978	0.00020247	0.000523713	0.000187519	0.000231101	0.000273149	0.000190509	0.000137971	0.00016053	0.000240959	0.000197114	0.000150228	0.000322	0.000210512	0.00033868		C494	4.35698e-05	4.32837e-05	0	0.000206019	0	0	0	0	0	0	0	0	0	4.30542e-06	0	2.09854e-05
A495	0.000150338	0.000218524	0	8.84e-05	8.88e-05	0.000109212		0.000160491	0.000190509	0.000152232	0.000158564	0.000107358	0.000207171	0.000158189	8.02e-05	6.91e-05	0.000210853	5.02e-05	9.22e-05	0.000109565	0.000107508	0.00012029	0.000193759		A495	5.12787e-05	8.12962e-05	4.30195e-05	4.93512e-05	0	9.79585e-05	4.89765e-05	0	0	0.000101641	0	0	3.52548e-07	0	1.10775e-05	8.45465e-05
T495	2.00451e-05	0.000109262	4.09e-05	5.05e-05	0.000114145	6.69704e-05		2.00614e-05	4.01071e-05	5.07e-05	2.43944e-05	8.05e-05	0.000109679	4.31e-05	6.02e-05	6.91e-05	0.00016124	3.01e-05	0.00013173	8.22e-05	0.000107508	0	4.84e-05		T495	0	0	0	0	1.35296e-05	4.27086e-05	0	0	2.12958e-06	9.42696e-05	0	6.47596e-05	1.52296e-05	4.05376e-05	0	0
C495	3.00677e-05	0	0.000286419	1.26e-05	3.8e-05	7.34173e-05		3.00921e-05	0	2.54e-05	3.65916e-05	0	1.22e-05	1.44e-05	1e-05	1.38e-05	0	1e-05	1.32e-05	2.74e-05	2.39e-05	1e-05	2.42e-05		C495	0	0	0	0	0	0	0	0	0	0	0	0	0	0	0	0
A496	3.01193e-05	7.3e-05	6.35e-05	6.33e-05	2.54e-05	5.10639e-05		6.02579e-05	7.02959e-05	1.27e-05	4.89141e-05	4.03e-05	2.44e-05	0.000129702	3.01e-05	4.16e-05	8.69e-05	0.000110608	7.91e-05	9.6e-05	7.18e-05	4.02e-05	2.43e-05		A496	9.19405e-06	1.92321e-05	0	0	0	0	7.86381e-05	0	0	3.58361e-05	5.95441e-05	2.80361e-05	4.49361e-05	2.07361e-05	0	0
T496	0.000130517	0.000170246	0.000148164	0.000139246	0.000101524	0.000137939		0.000180774	0.000190803	0.000266657	0.000195656	0.000161262	0.00021963	0.000216169	0.000150625	0.000152365	0.000148887	0.000100553	0.000158201	0.000178268	0.00015553	0.000220912	0.000145666		T496	4.28343e-05	5.28639e-05	0.000128718	5.77171e-05	2.33226e-05	8.16906e-05	7.82296e-05	1.26856e-05	1.44256e-05	1.09476e-05	0	2.02616e-05	4.03286e-05	1.75906e-05	8.29726e-05	7.72663e-06
G496	2.00795e-05	3.65e-05	1.06e-05	5.06e-05	2.54e-05	2.86359e-05		3.0129e-05	1.00423e-05	1.27e-05	0	0	1.22e-05	0	1e-05	2.77e-05	2.48e-05	0	2.64e-05	0	4.79e-05	0	1.21e-05		G496	1.49305e-06	0	0	0	0	0	0	0	0	0	0	0	0	1.92641e-05	0	0
A497	6.01558e-05	2.43e-05	0.000141867	8.84e-05	1.27e-05	6.54846e-05		1.00304e-05	2.00509e-05	3.8e-05	3.66037e-05	0	8.52e-05	2.87e-05	0	2.76e-05	0.000123733	3.01e-05	3.94e-05	2.73e-05	5.97e-05	4.01e-05	3.63e-05		A497	0	0	0	0	0	1.97154e-05	0	0	0	5.82484e-05	0	0	0	0	0	0
T497	0.00015039	9.71e-05	0.000185519	0.000126229	0.000126658	0.000137179		0.000120365	0.00011028	0.000341867	0.000183018	0.00014741	0.000182655	0.000201242	0.000190579	0.000165776	3.71e-05	0.000200882	0.000170866	0.000122897	0.000190933	0.000170441	9.69e-05		T497	0	0	0.000204688	4.58392e-05	1.02309e-05	4.54759e-05	6.40629e-05	5.33999e-05	2.85969e-05	0	6.37029e-05	3.36869e-05	0	5.37539e-05	3.32619e-05	0
G497	3.00779e-05	0	8.73e-05	0	0	2.34756e-05		3.00912e-05	0	7.6e-05	0	0	0	0	3.01e-05	0	0	3.01e-05	3.94e-05	4.1e-05	0	0	1.21e-05		G497	6.6156e-06	0	5.25244e-05	0	0	0	0	6.62442e-06	0	0	6.62442e-06	1.59244e-05	1.75244e-05	0	0	0
A498	0.000120682	0.00013377	3.3e-05	2.53e-05	7.62e-05	7.77904e-05		0.000100497	9.05014e-05	0.000101592	4.89087e-05	5.38e-05	4.88e-05	1.44e-05	7.04e-05	6.92e-05	6.21e-05	7.05e-05	0.000131971	0.000109828	9.57e-05	5.02e-05	0.000121426		A498	2.27071e-05	1.2711e-05	2.38016e-05	0	0	0	0	0	0	0	0	5.41806e-05	3.20376e-05	1.79096e-05	0	4.36356e-05
G498	6.03409e-05	7.3e-05	0	6.33e-05	7.62e-05	5.45682e-05		3.01492e-05	4.02228e-05	0.000241282	0	6.72e-05	6.1e-05	1.44e-05	3.02e-05	8.31e-05	9.93e-05	4.03e-05	9.24e-05	4.12e-05	5.98e-05	0	7.29e-05		G498	0	0	0.000186714	0	1.26318e-05	6.43181e-06	0	0	2.85318e-05	4.47318e-05	0	3.78318e-05	0	5.23181e-06	0	1.83318e-05
C498	0.000241364	0.000231056	0.000417569	0.000202475	0.000292212	0.000276935		0.000582885	0.000713955	0.000520661	0.000525769	0.000456952	0.000597889	0.000677477	0.00039207	0.000429101	0.000471622	0.000543976	0.000448703	0.000480499	0.000382752	0.000412006	0.000546415		C498	0.00030595	0.00043702	0.000243726	0.000248834	0.000180017	0.000320954	0.000400542	0.000115135	0.000152166	0.000194687	0.000267041	0.000171768	0.000203564	0.000105817	0.000135071	0.00026948
A499	6.01016e-05	8.42e-05	7.92e-05	7.49e-05	3.76e-05	6.72003e-05		0.000160387	0.000190367	3.76e-05	0.000145303	0.00014569	3.62e-05	0.000185291	0.000190373	0.000164067	0.000159115	0.000130391	0.000142644	0.000134702	0.000141963	0.000160327	6.01e-05		A499	9.31862e-05	0.000123167	0	7.81028e-05	7.84897e-05	0	0.000118091	0.000123173	9.68667e-05	9.19147e-05	6.31907e-05	7.54437e-05	6.75017e-05	7.47627e-05	9.31267e-05	0
T499	4.00677e-05	3.61e-05	0.000192366	8.73e-05	3.76e-05	7.86867e-05		0.000100242	0.000100193	1.25e-05	4.84344e-05	2.65e-05	4.82e-05	1.43e-05	5.01e-05	2.73e-05	3.67e-05	8.02e-05	5.19e-05	0.000107762	2.37e-05	5.01e-05	0		T499	2.15548e-05	2.15066e-05	0	0	0	0	0	0	0	0	1.51326e-06	0	2.90753e-05	0	0	0
C499	0	6.01e-05	0.000690256	3.74e-05	2.51e-05	0.000162571		1.00242e-05	1.00193e-05	0.000137881	1.21086e-05	0	2.41e-05	2.85e-05	1e-05	1.37e-05	1.22e-05	1e-05	0	2.69e-05	1.18e-05	1e-05	0		C499	0	0	0	0	0	0	0	0	0	0	0	0	0	0	0	0
A500	7.04218e-05	7.28e-05	8.01e-05	8.81e-05	7.6e-05	7.74844e-05		0.000210755	0.000120599	6.33e-05	4.88681e-05	0.000120495	7.3e-05	5.75e-05	0.000120519	0.000124232	8.66e-05	8.05e-05	0.000157408	8.19e-05	7.16e-05	7.03e-05	7.27e-05		A500	0.00013327	4.3115e-05	0	0	4.30106e-05	0	0	4.30346e-05	4.67476e-05	9.11563e-06	3.01563e-06	7.99236e-05	4.41563e-06	0	0	0
T500	4.0241e-05	8.49e-05	4.58e-05	7.55e-05	0.000101386	6.95654e-05		0.000140503	8.03996e-05	3.8e-05	4.88681e-05	6.69e-05	9.73e-05	0.000143808	6.03e-05	4.14e-05	7.42e-05	8.05e-05	6.56e-05	2.73e-05	7.16e-05	9.04e-05	0.000109101		T500	7.09376e-05	1.08342e-05	0	0	0	2.77346e-05	7.42426e-05	0	0	4.63459e-06	1.09346e-05	0	0	2.03459e-06	2.08346e-05	3.95356e-05
C500	1.00603e-05	0	3.43e-05	1.26e-05	0	1.13921e-05		3.01078e-05	2.00999e-05	0	0	0	1.22e-05	4.31e-05	2.01e-05	5.52e-05	2.47e-05	4.02e-05	0	1.37e-05	3.58e-05	5.02e-05	6.06e-05		C500	1.87157e-05	8.70784e-06	0	0	0	8.07948e-07	3.17079e-05	8.70795e-06	4.38079e-05	1.33079e-05	2.88079e-05	0	2.30795e-06	2.44079e-05	3.88079e-05	4.92079e-05
A501	7.01804e-05	8.49e-05	0.000136677	0.000100851	0.000101545	9.88307e-05		0.0002007	0.000140452	5.07e-05	0.000244565	0.00012055	0.000170528	8.63e-05	0.000110312	0.000124364	0.00011141	0.000100418	0.000105031	0.000177617	0.000143213	0.000110302	0.000109054		A501	0.00010187	4.16216e-05	0	0.000145734	2.17193e-05	7.16973e-05	0	1.14813e-05	2.55333e-05	1.25793e-05	1.58733e-06	6.20033e-06	7.87863e-05	4.43823e-05	1.14713e-05	1.02233e-05
T501	5.01288e-05	9.71e-05	0.000227796	0.000100851	8.89e-05	0.000112955		0.000130455	0.00013042	5.07e-05	1.22282e-05	2.68e-05	4.87e-05	5.75e-05	1e-05	6.91e-05	0.000148546	8.03e-05	7.88e-05	5.47e-05	5.97e-05	6.02e-05	2.42e-05		T501	1.75001e-05	1.74648e-05	0	0	0	0	0	0	0	3.55908e-05	0	0	0	0	0	0
C501	3.00773e-05	0	1.14e-05	2.52e-05	0	1.33355e-05		2.007e-05	1.00323e-05	2.53e-05	2.44565e-05	2.68e-05	2.44e-05	4.31e-05	0	0.000110546	2.48e-05	1e-05	1.31e-05	1.37e-05	3.58e-05	2.01e-05	2.42e-05		C501	6.73458e-06	0	1.19645e-05	1.1121e-05	1.34645e-05	1.10645e-05	2.97645e-05	0	9.72105e-05	1.14645e-05	0	0	3.6454e-07	2.24645e-05	6.76454e-06	1.08645e-05
T502	0.000100419	0.000110033	5.88e-05	0.000140331	0.00016684	0.000115285		0.000130912	0.000190999	0.000127755	0.000172231	0.000108086	9.81e-05	0.000188212	0.000150784	0.000125646	7.52e-05	0.000161357	9.32e-05	0.000152426	9.61e-05	0.000231244	0.000183146		T502	1.56279e-05	7.57144e-05	1.24705e-05	5.69468e-05	0	0	7.29275e-05	3.54995e-05	1.03615e-05	0	4.60725e-05	0	3.71415e-05	0	0.000115959	6.78615e-05
G502	0.000301256	0.000415678	8.23e-05	0.000395479	0.000308012	0.000300545		0.000302106	0.000381998	0.000319387	0.000356765	0.000270215	0.000318749	0.000246124	0.000331725	0.00044674	0.000350868	0.000383223	0.000293052	0.000429565	0.000348449	0.000281515	0.000231985		G502	1.56063e-06	8.14528e-05	1.8842e-05	5.622e-05	0	1.8204e-05	0	3.118e-05	0.000146195	5.0323e-05	8.2678e-05	0	0.00012902	4.7904e-05	0	0
C502	4.01675e-05	0.000134484	3.53e-05	6.38e-05	0.000115505	7.78513e-05		2.01404e-05	9.04732e-05	6.39e-05	6.15112e-05	1.35e-05	4.9e-05	2.9e-05	1.01e-05	2.79e-05	0.000137841	6.05e-05	7.99e-05	0.000138569	3.6e-05	5.03e-05	0		C502	0	1.26219e-05	0	0	0	0	0	0	0	5.99897e-05	0	2.0487e-06	6.07177e-05	0	0	0
A503	8.02262e-05	3.63e-05	4.69e-05	0.000138375	8.85e-05	7.80602e-05		0.000120386	0.000100322	3.78e-05	3.65364e-05	0.000226664	9.7e-05	7.16e-05	8.03e-05	1.38e-05	3.7e-05	0.000130605	0.000117664	9.51e-05	7.13e-05	0.000120348	0.00010871		A503	4.23262e-05	2.22618e-05	0	0	0.000148604	1.89398e-05	0	2.23975e-06	0	0	5.25448e-05	3.96038e-05	1.70398e-05	0	4.22878e-05	3.06498e-05
T503	1.00283e-05	4.83e-05	0.000105599	5.03e-05	1.26e-05	4.53655e-05		4.01288e-05	0.000110354	0.000163943	3.65364e-05	6.67e-05	9.7e-05	0.000100305	4.01e-05	4.13e-05	4.94e-05	3.01e-05	1.31e-05	0.000122283	2.38e-05	5.01e-05	0.000120789		T503	0	6.49888e-05	0.000118578	0	2.13345e-05	5.16345e-05	5.49395e-05	0	0	4.03454e-06	0	0	7.69175e-05	0	4.73454e-06	7.54235e-05
C503	9.02545e-05	2.42e-05	7.04e-05	1.26e-05	1.26e-05	4.20109e-05		1.00322e-05	1.00322e-05	0	0	0	4.85e-05	1.43e-05	2.01e-05	0	1.23e-05	1e-05	0	5.43e-05	4.75e-05	2.01e-05	2.42e-05		C503	0	0	0	0	0	6.4891e-06	0	0	0	0	0	0	1.22891e-05	5.4891e-06	0	0
T504	7.03843e-05	1.2e-05	4.79e-05	4.98e-05	5e-05	4.60169e-05		4.01647e-05	5.02084e-05	7.49e-05	9.6741e-05	0.000131803	6.01e-05	7.12e-05	4.02e-05	4.1e-05	8.57e-05	0.000120824	6.45e-05	9.37e-05	8.25e-05	0.000110623	0.000143835		T504	0	4.19151e-06	2.88831e-05	5.07242e-05	8.57861e-05	1.40831e-05	2.51831e-05	0	0	3.96831e-05	7.48071e-05	1.84831e-05	4.76831e-05	3.64831e-05	6.46061e-05	9.78181e-05
G504	0.000180988	0.000203825	0.000227659	0.000186765	6.25e-05	0.000172347		0.0003414	0.000381584	0.000599191	0.000241853	0.000395408	0.000276589	0.000142355	0.00027145	0.000232298	0.000159103	0.000231579	0.0002065	0.000200801	0.000306416	0.000271529	0.000371573		G504	0.000169052	0.000209236	0.000426844	6.95052e-05	0.000223061	0.000104242	0	9.91026e-05	5.99506e-05	0	5.92316e-05	3.41526e-05	2.84536e-05	0.000134069	9.91816e-05	0.000199226
C504	2.01098e-05	5.99e-05	0.000203695	0.00012451	0.000112563	0.000104156		4.01647e-05	2.00833e-05	6.24e-05	2.41853e-05	6.59e-05	2.41e-05	4.27e-05	1.01e-05	2.73e-05	3.67e-05	0	6.45e-05	0.00012048	3.54e-05	1.01e-05	5.99e-05		C504	0	0	0	0	0	0	0	0	0	0	0	0	1.63244e-05	0	0	0
T505	3.00845e-05	3.54e-05	3.64e-05	4.89e-05	3.68e-05	3.75169e-05		2.00604e-05	5.01751e-05	6.1e-05	4.75246e-05	2.58e-05	2.36e-05	9.82e-05	4.01e-05	2.69e-05	2.4e-05	0	2.51e-05	1.3e-05	6.95e-05	3.01e-05	4.71e-05		T505	0	1.26582e-05	2.34831e-05	1.00077e-05	0	0	6.06831e-05	2.58309e-06	0	0	0	0	0	3.19831e-05	0	9.58309e-06
G505	0.000210592	0.000117906	7.27e-05	0.00018319	0.000110332	0.000138944		0.000280845	0.000321121	0.000366059	0.000154455	0.000180331	8.25e-05	0.000336521	0.000230803	0.000255109	0.000239892	0.000251138	0.000201187	0.000312224	0.000382117	0.000321124	0.00032959		G505	0.000141901	0.000182177	0.000227115	1.55109e-05	4.1387e-05	0	0.000197577	9.1859e-05	0.000116165	0.000100948	0.000112194	6.2243e-05	0.00017328	0.000243173	0.00018218	0.000190646
C505	0	7.07e-05	1.21e-05	0.000170978	0.000171628	8.50812e-05		6.01811e-05	6.02101e-05	0.000134222	0.000142574	0.000115927	0.000141404	0.000112174	8.03e-05	0.000161121	0.000191913	3.01e-05	0.00023891	0.000143102	3.47e-05	8.03e-05	5.89e-05		C505	0	0	4.91408e-05	5.74925e-05	3.08458e-05	5.63228e-05	2.70928e-05	0	7.60398e-05	0.000106832	0	0.000153829	5.80208e-05	0	0	0
A506	5.01781e-05	5.88e-05	6.04e-05	9.71e-05	6.1e-05	6.54956e-05		0.000150497	0.000160639	6.08e-05	0.000177822	0.000180013	0.000105728	6.99e-05	9.03e-05	4.01e-05	0.000107324	9.04e-05	0.000125069	7.77e-05	8.08e-05	0.00021067	0.000129117		A506	8.5001e-05	9.51437e-05	0	0.000112326	0.000114517	4.02324e-05	4.40437e-06	2.48044e-05	0	4.18284e-05	2.49044e-05	5.95734e-05	1.22044e-05	1.53044e-05	0.000145174	6.36214e-05
T506	3.01069e-05	2.35e-05	0.000144847	3.64e-05	0	4.69708e-05		5.01655e-05	4.01598e-05	9.73e-05	3.55644e-05	7.71e-05	1.17e-05	9.79e-05	2.01e-05	5.34e-05	3.58e-05	8.04e-05	7.5e-05	3.88e-05	5.77e-05	3.01e-05	9.39e-05		T506	3.19477e-06	0	5.03292e-05	0	3.01292e-05	0	5.09292e-05	0	6.42922e-06	0	3.34292e-05	2.80292e-05	0	1.07292e-05	0	4.69292e-05
C506	2.00713e-05	0	1.21e-05	0	0	6.43425e-06		0	2.00799e-05	1.22e-05	1.18548e-05	0	0	0	0	0	2.38e-05	0	1.25e-05	0	0	3.01e-05	0		C506	0	1.36457e-05	5.76575e-06	5.42055e-06	0	0	0	0	0	1.73657e-05	0	6.06575e-06	0	0	2.36657e-05	0
A507	0.000120488	5.8e-05	1.19e-05	7.2e-05	6.01e-05	6.44976e-05		3.01175e-05	6.02755e-05	1.2e-05	8.18867e-05	6.32e-05	2.31e-05	5.53e-05	0.000100375	2.64e-05	4.71e-05	3.02e-05	4.91e-05	5.06e-05	7.97e-05	9.03e-05	3.47e-05		A507	0	0	0	1.73891e-05	0	0	0	3.58774e-05	0	0	0	0	0	1.52024e-05	2.58024e-05	0
G507	7.02847e-05	9.28e-05	0.000143239	0.00012	8.41e-05	0.000102085		2.00783e-05	3.01377e-05	3.59e-05	4.67924e-05	0.000113779	6.94e-05	5.53e-05	4.02e-05	5.28e-05	0.000176772	6.03e-05	0.000122633	0.000164499	1.14e-05	1e-05	2.32e-05		G507	0	0	0	0	1.16943e-05	0	0	0	0	7.46873e-05	0	2.05483e-05	6.24143e-05	0	0	0
C507	0.000853456	0.00093925	0.000179049	9.6e-05	0.00020432	0.000454415		0.00094368	0.00110505	0.00128039	0.000280754	0.000278125	0.000335431	0.000317732	0.000271014	0.000105664	0.000212127	0.000221157	0.000122633	0.000291036	0.000273258	0.000250893	0.000324213		C507	0.000489265	0.000650635	0.000825979	0	0	0	0	0	0	0	0	0	0	0	0	0
A508	0.000150654	4.64e-05	0.00020475	2.4e-05	7.21e-05	9.95808e-05		8.03657e-05	5.02018e-05	4.79e-05	5.85391e-05	0.000113911	8.11e-05	5.54e-05	1e-05	0.000211054	0.000106051	3.02e-05	7.35e-05	5.06e-05	5.7e-05	0.000160638	3.48e-05		A508	0	0	0	0	1.43302e-05	0	0	0	0.000111473	6.47023e-06	0	0	0	0	6.10572e-05	0
G508	2.00872e-05	3.48e-05	0.000120441	5.99e-05	0.000132234	7.34924e-05		4.01828e-05	3.01211e-05	2.4e-05	2.34156e-05	5.06e-05	1.16e-05	6.92e-05	1e-05	0.000105527	9.43e-05	0	4.9e-05	0.000101215	4.56e-05	4.02e-05	1.16e-05		G508	0	0	0	0	0	0	0	0	3.20346e-05	2.08076e-05	0	0	2.77226e-05	0	0	0
C508	0.000130567	0.000220397	1.2e-05	0.00011987	0.000156276	0.000127822		0.000251143	0.00027109	0.000431298	0.000351235	0.000341733	0.000173742	0.000193734	0.00021078	0.000184672	0.000176751	0.000181072	0.000208295	0.000113866	0.000102577	0.000140558	0.000289633		C508	0.000123321	0.000143268	0.000303476	0.000223413	0.000213911	4.59201e-05	6.59121e-05	8.29581e-05	5.68501e-05	4.89291e-05	5.32501e-05	8.04731e-05	0	0	1.27361e-05	0.000161811
A509	2.00696e-05	6.96e-05	0.000117913	7.19e-05	3.61e-05	6.31165e-05		6.01872e-05	7.02304e-05	1.2e-05	8.19058e-05	0.000101215	2.31e-05	2.76e-05	2.01e-05	2.64e-05	9.42e-05	3.01e-05	7.34e-05	0.000113585	0.000102452	5.02e-05	6.95e-05		A509	0	7.11383e-06	0	1.87893e-05	3.80985e-05	0	0	0	0	3.10835e-05	0	1.02835e-05	5.04685e-05	3.93355e-05	0	6.38347e-06
T509	8.02786e-05	6.96e-05	8.25e-05	0.000107819	3.61e-05	7.52595e-05		2.00624e-05	5.01645e-05	7.18e-05	9.36067e-05	0.000101215	4.63e-05	9.68e-05	8.03e-05	0.000144928	9.42e-05	8.04e-05	7.34e-05	5.05e-05	6.83e-05	5.02e-05	2.32e-05		T509	0	0	0	1.83472e-05	2.59555e-05	0	2.15405e-05	5.04049e-06	6.96685e-05	1.89405e-05	5.14049e-06	0	0	0	0	0
G509	1.00348e-05	1.16e-05	0.00043628	2.4e-05	1.2e-05	9.8783e-05		1.00312e-05	2.00658e-05	3.59e-05	1.17008e-05	3.8e-05	0	0	2.01e-05	1.32e-05	0	2.01e-05	0	2.52e-05	3.42e-05	1e-05	3.48e-05		G509	0	0	0	0	0	0	0	0	0	0	0	0	0	0	0	0
A510	4.02791e-05	3.52e-05	9.5e-05	6.06e-05	0.000109689	6.81536e-05		8.03406e-05	9.05278e-05	6.06e-05	4.73844e-05	0.000115586	4.69e-05	6.99e-05	3.02e-05	5.32e-05	1.19e-05	9.06e-05	3.73e-05	7.71e-05	6.91e-05	3.02e-05	3.52e-05		A510	1.2187e-05	2.23742e-05	0	0	4.74324e-05	0	1.74637e-06	0	0	0	2.24464e-05	0	8.94637e-06	9.46373e-07	0	0
T510	0.000191326	0.000164219	9.5e-05	0.000133224	2.44e-05	0.000121634		8.03406e-05	0.000110645	4.85e-05	0.000201384	8.99e-05	0.000246259	9.78e-05	0.000120655	3.99e-05	0.000202468	0.000141005	6.22e-05	0.000102747	0.000138276	0.000120607	0.000105495		T510	0	0	0	7.97498e-05	0	0.000124625	0	0	0	8.08342e-05	1.93712e-05	0	0	1.66422e-05	0	0
G510	1.00698e-05	0	0.000149246	6.06e-05	0	4.39832e-05		2.00852e-05	4.02346e-05	2.43e-05	0	1.28e-05	3.52e-05	4.19e-05	4.02e-05	1.33e-05	1.19e-05	3.02e-05	0	2.57e-05	3.46e-05	1.01e-05	0		G510	0	0	0	0	0	0	0	0	0	0	0	0	0	0	0	0
A511	6.01733e-05	2.34e-05	6.81e-05	0.000145222	3.65e-05	6.66791e-05		0.000140396	8.02085e-05	9.7e-05	0.000165739	8.97e-05	8.2e-05	8.37e-05	7.02e-05	0.000106522	5.95e-05	5.02e-05	7.47e-05	8.99e-05	9.2e-05	0.000100288	7.03e-05		A511	7.37169e-05	1.35295e-05	3.03209e-05	9.90603e-05	2.30209e-05	1.53209e-05	1.70209e-05	3.52094e-06	3.98429e-05	0	0	8.02094e-06	2.32209e-05	2.53209e-05	3.36089e-05	3.62094e-06
G511	3.00866e-05	2.34e-05	0.000149905	0.000145222	3.65e-05	7.70227e-05		2.00566e-05	2.00521e-05	6.06e-05	3.55156e-05	2.56e-05	4.68e-05	8.37e-05	2.01e-05	7.99e-05	3.57e-05	4.02e-05	2.49e-05	7.71e-05	9.2e-05	1e-05	2.34e-05		G511	0	0	0	0	0	0	6.67727e-06	0	2.87727e-06	0	0	0	7.72701e-08	1.49773e-05	0	0
C511	0.000210607	0.000199136	0	0.000108917	0.000182731	0.000140278		0.000381075	0.000411069	0.000351456	0.000295963	0.000333197	0.000386507	0.000237238	0.000280758	0.000319565	0.000249893	0.00038148	0.00038575	0.000295523	0.000253115	0.000270777	0.000339555		C511	0.000240797	0.000270791	0.000211178	0.000155685	0.000192919	0.000246229	9.69599e-05	0.00014048	0.000179287	0.000109615	0.000241202	0.000245472	0.000155245	0.000112837	0.000130499	0.000199277
A512	0.000140198	0.000151108	2.72e-05	5.98e-05	8.44e-05	9.25411e-05		8.01868e-05	0.000150314	0.000191842	0.000187873	0.000190307	9.28e-05	0.0001108	0.000160276	0.000158142	0.000129299	0.000200574	0.000122554	0.000113715	0.000148057	0.000190367	0.000116063		A512	0	5.7773e-05	9.93009e-05	9.53317e-05	9.77659e-05	2.58864e-07	1.82589e-05	6.77349e-05	6.56009e-05	3.67579e-05	0.000108033	3.00129e-05	2.11739e-05	5.55159e-05	9.78259e-05	2.35219e-05
T512	2.00282e-05	2.32e-05	9.53e-05	3.59e-05	2.41e-05	3.97056e-05		5.01168e-05	0.000130272	2.4e-05	3.52262e-05	2.54e-05	4.64e-05	1.39e-05	2e-05	3.95e-05	3.53e-05	1e-05	7.35e-05	2.53e-05	0	1e-05	2.32e-05		T512	1.04111e-05	9.05666e-05	0	0	0	6.69435e-06	0	0	0	0	0	3.37944e-05	0	0	0	0
C512	1.00141e-05	4.65e-05	0	1.2e-05	1.21e-05	1.61228e-05		1.00234e-05	4.00838e-05	0	0	0	0	0	3.01e-05	5.27e-05	3.53e-05	1e-05	2.45e-05	5.05e-05	2.28e-05	3.01e-05	3.48e-05		C512	0	2.3961e-05	0	0	0	0	0	1.39772e-05	3.65772e-05	1.91772e-05	0	8.37718e-06	3.43772e-05	6.67718e-06	1.39772e-05	1.86772e-05
A513	0.000100282	6.97e-05	8.15e-05	0.000143577	7.22e-05	9.34518e-05		0.000180527	7.02515e-05	4.79e-05	0.000105604	0.000152126	6.95e-05	6.93e-05	9.02e-05	2.63e-05	0.000105678	0.000170585	0.000122318	5.05e-05	7.97e-05	0.000160491	5.8e-05		A513	8.70754e-05	0	0	1.21523e-05	5.86742e-05	0	0	0	0	1.22262e-05	7.71332e-05	2.88662e-05	0	0	6.70392e-05	0
T513	9.02536e-05	0.000116133	0.000149426	2.39e-05	9.62e-05	9.51825e-05		6.01757e-05	4.01437e-05	4.79e-05	0	7.61e-05	2.32e-05	4.16e-05	3.01e-05	3.95e-05	4.7e-05	5.02e-05	4.89e-05	7.57e-05	6.83e-05	7.02e-05	0.000162475		T513	0	0	0	0	0	0	0	0	0	0	0	0	0	0	0	6.72925e-05
C513	1.00282e-05	1.16e-05	1.36e-05	0	0	7.04564e-06		2.00586e-05	0	0	2.34676e-05	2.54e-05	0	0	2.01e-05	2.63e-05	1.17e-05	1e-05	2.45e-05	1.26e-05	1.14e-05	3.01e-05	5.8e-05		C513	1.30129e-05	0	0	1.64219e-05	1.83544e-05	0	0	1.30544e-05	1.92544e-05	4.65436e-06	2.95436e-06	1.74544e-05	5.55436e-06	4.35436e-06	2.30544e-05	5.09544e-05
A514	6.01878e-05	4.66e-05	9.55e-05	8.41e-05	8.44e-05	7.41576e-05		0.000110458	0.000100373	2.4e-05	4.70173e-05	0.00013997	4.65e-05	6.94e-05	6.02e-05	7.92e-05	0.000141526	2.01e-05	8.6e-05	5.06e-05	0.000102685	0	2.33e-05		A514	3.63008e-05	2.62158e-05	0	0	6.58124e-05	0	0	0	5.04244e-06	6.73684e-05	0	1.18424e-05	0	2.85274e-05	0	0
T514	0.00023072	0.000360927	5.46e-05	0.000216141	0.000265297	0.000225537		0.000331375	0.000371382	0.000204192	0.000211578	0.000343564	0.000325419	0.00030542	0.000260803	0.000250951	0.000117938	0.000341705	0.000196493	0.000341763	0.000285235	0.000260877	0.00033739		T514	0.000105838	0.000145845	0	0	0.000118027	9.9882e-05	7.9883e-05	3.5266e-05	2.5414e-05	0	0.000116168	0	0.000116226	5.9698e-05	3.534e-05	0.000111853
G514	1.00313e-05	4.66e-05	0.000354658	3.6e-05	0	8.94579e-05		2.00833e-05	3.0112e-05	1.2e-05	0	2.54e-05	1.16e-05	1.39e-05	3.01e-05	0	0	2.01e-05	3.68e-05	2.53e-05	1.14e-05	0	1.16e-05		G514	0	0	0	0	0	0	0	0	0	0	0	0	0	0	0	0
T515	8.03245e-05	4.64e-05	9.38e-05	9.54e-05	3.6e-05	7.03849e-05		0.000100235	3.0106e-05	0.000119636	5.85391e-05	5.06e-05	6.94e-05	0.000179709	2.01e-05	1.31e-05	4.68e-05	6.03e-05	6.1e-05	8.81e-05	0.000102194	7.02e-05	3.48e-05		T515	2.98496e-05	0	4.92511e-05	0	0	0	0.000109324	0	0	0	0	0	1.77151e-05	3.18091e-05	0	0
G515	0.000251014	0.000347963	2.68e-05	0.000190765	0.000251941	0.000213697		0.000230539	0.000361272	0.000287126	0.000409774	0.000290716	0.000277482	0.000193533	0.000371184	0.000302067	0.00018734	0.00023103	0.000219496	0.000276775	0.000306581	0.00025083	0.000231693		G515	1.68428e-05	0.000147575	7.34294e-05	0.000196077	7.70194e-05	6.37854e-05	0	0.000157487	8.83704e-05	0	1.73334e-05	5.79938e-06	6.30784e-05	9.28844e-05	3.71334e-05	1.79964e-05
C515	5.02028e-05	0.000139185	0	8.35e-05	9.6e-05	7.37776e-05		2.00469e-05	2.00706e-05	9.57e-05	3.51235e-05	0.000113758	0.000115618	0.000138238	6.02e-05	0.000144467	0.000234176	4.02e-05	0.000195108	0.000201291	9.08e-05	0.000100332	0.000162185		C515	0	0	2.19224e-05	0	3.99804e-05	4.18404e-05	6.44604e-05	0	7.06894e-05	0.000160398	0	0.00012133	0.000127513	1.70224e-05	2.65544e-05	8.84074e-05
A516	0.000170228	0.000116275	9.48e-05	0.000143754	6.03e-05	0.000117071		0.000190367	0.000360595	0.000156062	0.000223141	0.00017783	0.000116005	0.000110888	0.000200327	3.96e-05	0.000176383	0.000190581	0.000208053	0.000214915	0.000102502	0.000160322	0.000174378		A516	7.3296e-05	0.000243524	3.89906e-05	0.000106069	6.07586e-05	0	0	8.32556e-05	0	5.93116e-05	7.35096e-05	9.09816e-05	9.78436e-05	0	4.32506e-05	5.73066e-05
T516	5.00671e-05	0	5.42e-05	5.99e-05	3.62e-05	4.00734e-05		0	2.00331e-05	8.4e-05	5.87213e-05	7.62e-05	0	0	4.01e-05	5.27e-05	5.88e-05	2.01e-05	8.57e-05	1.26e-05	0	3.01e-05	2.33e-05		T516	0	0	4.39266e-05	1.86479e-05	3.61266e-05	0	0	2.6582e-08	1.26266e-05	1.87266e-05	0	4.56266e-05	0	0	0	0
C516	0	1.16e-05	0	0	1.21e-05	4.74e-06		1.00193e-05	0	2.4e-05	0	0	0	0	1e-05	1.32e-05	2.35e-05	1e-05	1.22e-05	1.26e-05	1.14e-05	1e-05	0		C516	5.27934e-06	0	1.926e-05	0	0	0	0	5.26e-06	8.46e-06	1.876e-05	5.26e-06	7.46e-06	7.86e-06	6.66e-06	5.26e-06	0
A517	3.01268e-05	3.48e-05	8.13e-05	8.39e-05	6.02e-05	5.80654e-05		4.01857e-05	5.02401e-05	3.6e-05	1.17303e-05	0.000101559	4.64e-05	1.39e-05	8.03e-05	5.28e-05	5.88e-05	7.04e-05	0	0.000100982	4.56e-05	6.02e-05	4.65e-05		A517	0	0	0	0	4.34936e-05	0	0	2.22346e-05	0	7.34633e-07	1.23346e-05	0	4.29166e-05	0	2.13463e-06	0
T517	0.000150634	0.000150984	9.48e-05	0.00015578	0.000180675	0.000146575		0.000241114	0.000331585	0.000467749	0.000222877	0.000126949	0.000150719	0.000221662	0.000220912	0.000184894	0.000199951	0.000231232	0.000281669	0.000201964	0.000273364	0.000160593	0.00011617		T517	9.45393e-05	0.00018501	0.000321174	7.63019e-05	0	4.14437e-06	7.50874e-05	7.43374e-05	3.83194e-05	5.33764e-05	8.46574e-05	0.000135094	5.53894e-05	0.000126789	1.40184e-05	0
G517	1.00423e-05	2.32e-05	1.35e-05	1.2e-05	0	1.17485e-05		1.00464e-05	0	0	3.5191e-05	1.27e-05	2.32e-05	0	0	0	1.18e-05	0	0	1.26e-05	0	2.01e-05	2.32e-05		G517	0	0	0	2.34426e-05	9.51544e-07	1.14515e-05	0	0	0	5.15444e-08	0	0	8.51544e-07	0	8.35154e-06	1.14515e-05
T518	0.000110308	9.34e-05	0.000178635	8.41e-05	9.68e-05	0.000112649		9.02075e-05	0.000120315	6.02e-05	7.07039e-05	0.000127637	5.82e-05	4.17e-05	0.000110325	9.27e-05	8.26e-05	7.03e-05	0.000159965	0.000101514	5.72e-05	0.000130327	0.000116596		T518	0	7.66667e-06	0	0	1.49884e-05	0	0	0	0	0	0	4.73164e-05	0	0	1.76784e-05	3.94745e-06
G518	0.000190532	0.000385307	0.000494682	0.000228184	0.000254071	0.000310555		0.000501153	0.000491287	0.000349313	0.000424223	0.00020422	0.000291246	0.000222565	0.000341006	0.000238281	0.00040118	0.000311139	0.000553723	0.000431434	0.000251469	0.00033083	0.000338129		G518	0.000190598	0.000180732	3.87579e-05	0.000113668	0	0	0	3.04509e-05	0	9.06249e-05	5.83883e-07	0.000243168	0.000120879	0	2.02749e-05	2.75739e-05
C518	8.02238e-05	0.000128436	8.24e-05	0.000108087	0.000108888	0.000101607		9.02075e-05	9.02364e-05	7.23e-05	7.07039e-05	0.000114874	8.15e-05	8.35e-05	2.01e-05	0.000119141	8.26e-05	1e-05	7.38e-05	0.000139582	9.14e-05	4.01e-05	2.33e-05		C518	0	0	0	0	1.3267e-05	0	0	0	1.7534e-05	0	0	0	3.7975e-05	0	0	0
A519	6.01534e-05	8.12e-05	8.09e-05	3.58e-05	4.8e-05	6.12107e-05		3.00915e-05	5.01329e-05	0.000143398	3.5107e-05	0.000101267	0.00010408	4.15e-05	1e-05	3.95e-05	5.86e-05	0.000110444	4.87e-05	7.54e-05	6.82e-05	5.02e-05	0.00012739		A519	0	0	8.21873e-05	0	4.00563e-05	4.28693e-05	0	0	0	0	4.92333e-05	0	1.41893e-05	6.98932e-06	0	6.61793e-05
T519	7.0179e-05	1.16e-05	8.09e-05	2.39e-05	2.4e-05	4.21158e-05		2.0061e-05	9.02391e-05	2.39e-05	3.5107e-05	7.6e-05	3.47e-05	2.76e-05	4.01e-05	2.63e-05	2.35e-05	4.02e-05	9.75e-05	1.26e-05	4.55e-05	6.02e-05	2.32e-05		T519	0	4.81233e-05	0	0	3.38842e-05	0	0	0	0	0	0	5.53842e-05	0	3.38421e-06	1.80842e-05	0
C519	1.00256e-05	0	0	4.77e-05	0	1.15451e-05		2.0061e-05	1.00266e-05	3.58e-05	9.36187e-05	1.27e-05	3.47e-05	1.38e-05	3.01e-05	2.63e-05	2.35e-05	0	0	0	4.55e-05	1e-05	1.16e-05		C519	8.51587e-06	0	2.42549e-05	8.20736e-05	1.15489e-06	2.31549e-05	2.25489e-06	1.85549e-05	1.47549e-05	1.19549e-05	0	0	0	3.39549e-05	0	5.4887e-08
T520	7.03907e-05	6.99e-05	2.66e-05	2.4e-05	8.45e-05	5.50781e-05		5.02629e-05	8.05064e-05	0.000119921	9.4059e-05	5.09e-05	4.65e-05	9.71e-05	0.000110668	2.64e-05	7.09e-05	7.05e-05	0.000110196	6.31e-05	0.000125488	6.03e-05	5.81e-05		T520	0	2.54283e-05	6.48429e-05	3.89809e-05	0	0	4.20219e-05	5.55899e-05	0	1.58219e-05	1.54219e-05	5.51179e-05	8.02187e-06	7.04099e-05	5.22187e-06	3.02187e-06
G520	0.000331842	0.000279645	0.000106472	0.000276389	0.000301859	0.000259241		0.000402103	0.000533355	0.000311795	0.000387993	0.000369177	0.000522812	0.00054087	0.000281701	0.000594829	0.000378036	0.000362735	0.00046527	0.000517566	0.000490543	0.00032166	0.000523177		G520	0.000142862	0.000274113	5.25537e-05	0.000128752	0.000109936	0.000263571	0.000281629	2.24597e-05	0.000335588	0.000118795	0.000103494	0.000206029	0.000258325	0.000231302	6.24187e-05	0.000263936
C520	4.02232e-05	0.000139823	0.000119781	0.00015622	6.04e-05	0.000103289		2.01051e-05	3.01899e-05	0.000119921	0.000117574	0.000140033	4.65e-05	5.55e-05	2.01e-05	6.61e-05	0.000106323	3.02e-05	7.35e-05	7.57e-05	6.84e-05	2.01e-05	0.000116261		C520	0	0	1.66316e-05	1.42843e-05	3.67436e-05	0	0	0	0	3.03355e-06	0	0	0	0	0	1.29716e-05
A521	0.000110319	5.81e-05	2.59e-05	0.000131378	3.6e-05	7.23394e-05		8.02222e-05	0.000100245	0.00010759	9.37603e-05	0.000126986	5.79e-05	5.53e-05	9.03e-05	2.63e-05	7.05e-05	0.000100547	3.66e-05	7.54e-05	7.97e-05	7.03e-05	9.27e-05		A521	7.88285e-06	2.79052e-05	3.52506e-05	2.14209e-05	5.46466e-05	0	0	1.79606e-05	0	0	2.82076e-05	0	3.06064e-06	7.36064e-06	0	2.03606e-05
T521	2.0058e-05	3.48e-05	0.000181476	5.97e-05	3.6e-05	6.64068e-05		5.01389e-05	2.00489e-05	2.39e-05	0.0001172	0.000126986	5.79e-05	8.3e-05	2.01e-05	5.27e-05	0.000129324	4.02e-05	3.66e-05	1.26e-05	5.69e-05	6.02e-05	8.11e-05		T521	0	0	0	5.07935e-05	6.05792e-05	0	1.65932e-05	0	0	6.29172e-05	0	0	0	0	0	1.46932e-05
C521	0	0	0.000155551	1.19e-05	2.4e-05	3.82902e-05		3.00833e-05	1.00245e-05	1.2e-05	0	1.27e-05	0	0	0	2.63e-05	3.53e-05	0	2.44e-05	0	2.28e-05	2.01e-05	0		C521	0	0	0	0	0	0	0	0	0	0	0	0	0	0	0	0
A522	0.000140328	0.000127856	7.74e-05	2.39e-05	6.01e-05	8.59169e-05		0.000190493	0.000150379	7.18e-05	0.000164163	0.00015247	0.000104245	0.000124623	0.000100293	6.59e-05	0.000188238	0.00027124	0.00013432	0.000100647	9.12e-05	0.000100307	0.000116048		A522	0.000104577	6.44621e-05	0	7.82463e-05	6.65531e-05	1.83281e-05	3.87061e-05	1.43761e-05	0	0.000102321	0.000185323	4.84031e-05	1.47301e-05	5.28313e-06	1.43901e-05	3.01311e-05
T522	4.00938e-05	0.00013948	3.87e-05	9.57e-05	7.21e-05	7.72148e-05		4.01039e-05	5.01263e-05	9.58e-05	9.38075e-05	6.35e-05	1.16e-05	2.77e-05	0	2.63e-05	7.06e-05	7.03e-05	8.55e-05	7.55e-05	6.84e-05	1e-05	6.96e-05		T522	0	0	1.85852e-05	1.65928e-05	0	0	0	0	0	0	0	8.28524e-06	0	0	0	0
C522	2.00469e-05	1.16e-05	0	1.2e-05	1.2e-05	1.11294e-05		1.0026e-05	1.00253e-05	3.59e-05	0	1.27e-05	2.32e-05	0	1e-05	1.32e-05	2.35e-05	0	0	2.52e-05	0	0	0		C522	0	0	2.47706e-05	0	1.57062e-06	1.20706e-05	0	0	2.07062e-06	1.23706e-05	0	0	1.40706e-05	0	0	0
A523	3.01468e-05	3.51e-05	3.8e-05	0.000108359	3.63e-05	4.95812e-05		3.01514e-05	9.04223e-05	0	1.17916e-05	3.84e-05	0.000128119	8.34e-05	5.02e-05	5.3e-05	9.47e-05	4.03e-05	4.92e-05	0.000101348	3.43e-05	5.02e-05	2.33e-05		A523	0	4.08411e-05	0	0	0	7.85378e-05	3.38188e-05	6.18837e-07	3.41884e-06	4.51188e-05	0	0	5.17668e-05	0	6.18837e-07	0
T523	0.000140685	0.000151889	0.000101207	8.43e-05	0.000193761	0.000134368		0.000140706	8.03754e-05	4.81e-05	0.000117916	8.96e-05	0.000116471	0.000180797	0.000130601	0.000132378	0.000130213	0.000130903	0.00011064	0.000316712	0.00012592	0.000170772	0.000139863		T523	6.33792e-06	0	0	0	0	0	4.64286e-05	0	0	0	0	0	0.000182344	0	3.64036e-05	5.49457e-06
G523	3.01468e-05	3.51e-05	0.000847608	7.22e-05	4.84e-05	0.000206691		0	1.00469e-05	0	0	1.28e-05	2.33e-05	2.78e-05	6.03e-05	3.97e-05	3.55e-05	3.02e-05	3.69e-05	5.07e-05	0	1e-05	1.17e-05		G523	0	0	0	0	0	0	0	0	0	0	0	0	0	0	0	0
A524	6.03634e-05	4.67e-05	3.79e-05	3.61e-05	1.21e-05	3.86327e-05		0.000100555	6.03774e-05	4.81e-05	2.35755e-05	1.28e-05	4.66e-05	1.39e-05	2.01e-05	0	2.37e-05	3.02e-05	8.61e-05	3.8e-05	4.57e-05	6.03e-05	2.33e-05		A524	6.19224e-05	2.17447e-05	9.46732e-06	0	0	7.96732e-06	0	0	0	0	0	4.74673e-05	0	7.06732e-06	2.16673e-05	0
G524	6.03634e-05	5.83e-05	5.06e-05	0.000108323	6.06e-05	6.76373e-05		0.000100555	6.03774e-05	3.61e-05	5.89386e-05	6.39e-05	3.49e-05	0.000125085	2.01e-05	9.26e-05	0.000118296	8.06e-05	8.61e-05	0.000113983	9.15e-05	2.01e-05	8.15e-05		G524	3.29178e-05	0	0	0	0	0	5.74477e-05	0	2.49627e-05	5.06587e-05	1.29627e-05	1.84627e-05	4.63457e-05	2.38627e-05	0	1.38627e-05
C524	0.000372241	0.000338279	0.000113783	0.000228681	0.000266563	0.000263909		0.000824552	0.000724528	0.000541458	0.000707264	0.00057494	0.000337515	0.000361357	0.00048265	0.000476065	0.000508671	0.00041309	0.000406049	0.000227966	0.000617573	0.000683335	0.000349321		C524	0.000560642	0.000460619	0.000277549	0.000443354	0.000311031	7.36056e-05	9.74476e-05	0.000218741	0.000212156	0.000244762	0.000149181	0.00014214	0	0.000353664	0.000419426	8.54116e-05
A525	0.000171887	0.000128822	8.84e-05	0.000169062	8.5e-05	0.000128634		0.000150789	9.08953e-05	7.24e-05	0.000106527	0.000115781	8.17e-05	4.19e-05	6.05e-05	7.98e-05	9.5e-05	0.000100953	0.000111151	0.000101895	0.0001149	5.04e-05	9.36e-05		A525	2.21544e-05	0	0	0	0	0	0	0	0	0	0	0	0	0	0	0
T525	7.07771e-05	0	7.58e-05	0.000108683	7.29e-05	6.5632e-05		8.04206e-05	4.03979e-05	3.62e-05	3.55088e-05	5.15e-05	3.5e-05	0	5.04e-05	0.000132919	7.12e-05	0.000121144	7.41e-05	8.92e-05	4.6e-05	6.05e-05	0		T525	1.47886e-05	0	0	0	0	0	0	0	6.7287e-05	5.56797e-06	5.5512e-05	8.46797e-06	2.3568e-05	0	0	0
C525	0	0	1.26e-05	2.42e-05	1.21e-05	9.78e-06		0	1.00995e-05	1.21e-05	0	2.57e-05	1.17e-05	5.58e-05	4.03e-05	1.33e-05	0	3.03e-05	1.24e-05	1.27e-05	4.6e-05	1.01e-05	0		C525	0	3.1948e-07	2.32e-06	0	1.592e-05	1.92e-06	4.602e-05	3.052e-05	3.52e-06	0	2.052e-05	2.62e-06	2.92e-06	3.622e-05	3.2e-07	0
T526	6.02398e-05	0.000106166	5.13e-05	8.49e-05	7.33e-05	7.51812e-05		0.000130519	0.00013059	4.86e-05	3.5785e-05	6.49e-05	0.00015283	4.21e-05	0.00011045	5.34e-05	8.35e-05	7.04e-05	6.21e-05	0.000102487	2.31e-05	0.000160565	0.000141351		T526	5.53383e-05	5.54091e-05	0	0	0	7.76488e-05	0	3.52688e-05	0	8.31885e-06	0	0	2.73058e-05	0	8.53838e-05	6.61698e-05
G526	0.000180719	0.000235924	0.000243699	0.000194041	0.000158827	0.000202642		0.000261039	0.000411862	0.00042562	0.00028628	0.000415541	0.00036444	0.000252884	0.000190776	0.000173481	0.000310181	0.000180943	0.000223508	0.00030746	0.000369506	0.000280989	0.000247364		G526	5.83969e-05	0.00020922	0.000222978	8.3638e-05	0.000212899	0.000161798	5.02419e-05	0	0	0.000107539	0	2.08659e-05	0.000104818	0.000166864	7.83469e-05	4.47219e-05
C526	3.01199e-05	1.18e-05	2.57e-05	2.43e-05	2.44e-05	2.3264e-05		4.01598e-05	4.01816e-05	1.22e-05	4.77133e-05	2.6e-05	3.53e-05	5.62e-05	4.02e-05	0	8.35e-05	6.03e-05	3.73e-05	1.28e-05	1.15e-05	3.01e-05	0		C526	1.68959e-05	1.69176e-05	0	2.44494e-05	2.73602e-06	1.2036e-05	3.2936e-05	1.6936e-05	0	6.0236e-05	3.7036e-05	1.4036e-05	0	0	6.83602e-06	0
T527	9.08522e-05	0.000119049	8.97e-05	3.67e-05	2.47e-05	7.22002e-05		5.02821e-05	8.05826e-05	6.14e-05	9.63043e-05	6.6e-05	5.94e-05	9.93e-05	4.03e-05	4.04e-05	9.64e-05	3.02e-05	5.03e-05	5.2e-05	0.000128299	4.03e-05	7.14e-05		T527	0	8.38237e-06	0	2.41041e-05	0	0	2.70998e-05	0	0	2.41998e-05	0	0	0	5.60988e-05	0	0
G527	0.000211988	0.000166669	2.56e-05	0.00017135	0.000123536	0.000139829		0.000160903	0.000292112	0.000307069	0.000361141	0.000369413	0.000249543	0.000241145	0.000322412	0.000242199	0.000120539	0.000171383	0.000188715	0.000259929	0.000244935	0.000271999	0.000250036		G527	2.1074e-05	0.000152283	0.00016724	0.000221313	0.000229584	0.000109714	0.000101316	0.000182583	0.00010237	0	3.15543e-05	4.88863e-05	0.0001201	0.000105106	0.00013217	0.000110207
C527	3.02841e-05	5.95e-05	0.000204999	0.000110154	6.18e-05	9.33474e-05		2.01128e-05	4.02913e-05	0.000380765	3.61141e-05	0.000145126	9.51e-05	0.000127665	6.05e-05	0.000148011	0.000120539	2.02e-05	3.77e-05	9.1e-05	0.000104972	6.04e-05	7.14e-05		C527	0	0	0.000287418	0	5.17786e-05	1.75259e-06	3.43176e-05	0	5.46636e-05	2.71916e-05	0	0	0	1.16246e-05	0	0
A528	0.000100696	3.58e-05	6.31e-05	2.46e-05	0.000149142	7.46676e-05		5.02654e-05	0.000120738	9.87e-05	6.03537e-05	1.33e-05	0.000107308	4.27e-05	0.000140861	5.4e-05	7.27e-05	6.05e-05	0.000139212	9.16e-05	0.000128655	0.000110582	8.36e-05		A528	0	4.60701e-05	2.40324e-05	0	0	3.26404e-05	0	6.61934e-05	0	0	0	6.45444e-05	1.69324e-05	5.39874e-05	3.59144e-05	8.93244e-06
G528	2.01392e-05	7.16e-05	2.52e-05	0.00013531	0.000174	8.52498e-05		4.02123e-05	3.01844e-05	9.87e-05	0.000144849	0.000132519	8.35e-05	0.000142298	2.01e-05	4.05e-05	6.06e-05	3.02e-05	0.000139212	0.000104631	0.000152047	3.02e-05	0.000119447		G528	0	0	1.34502e-05	5.9599e-05	4.72692e-05	0	5.70482e-05	0	0	0	0	5.39622e-05	1.93812e-05	6.67972e-05	0	3.41972e-05
C528	0.000221531	0.000143266	2.52e-05	2.46e-05	8.7e-05	0.000100319		0.000251327	0.00027166	0.000283628	0.000350051	0.00021203	0.000202692	0.000213447	0.000150922	0.000108058	8.48e-05	0.000251986	0.000265769	0.000222341	0.000292398	0.000241269	0.00020306		C528	0.000151008	0.00017134	0.000183309	0.000249732	0.000111711	0.000102373	0.000113128	5.06026e-05	7.73864e-06	0	0.000151667	0.00016545	0.000122022	0.000192079	0.00014095	0.000102741
A529	0.000140613	1.19e-05	7.56e-05	0.000147035	8.67e-05	9.23696e-05		0.000110373	0.000120509	9.84e-05	6.01982e-05	9.25e-05	5.94e-05	7.1e-05	0.00017069	0.000202391	0.000120821	0.000120644	0.000151711	6.53e-05	0.000128314	0.000180681	8.34e-05		A529	1.80034e-05	2.81389e-05	6.03039e-06	0	1.30385e-07	0	0	7.83204e-05	0.000110021	2.84514e-05	2.82744e-05	5.93414e-05	0	3.59444e-05	8.83114e-05	0
T529	1.00438e-05	1.19e-05	8.82e-05	3.68e-05	8.67e-05	4.67288e-05		2.00678e-05	5.02119e-05	1.23e-05	4.81585e-05	2.64e-05	2.38e-05	1.42e-05	3.01e-05	4.05e-05	0.000157067	3.02e-05	8.85e-05	3.92e-05	2.33e-05	4.02e-05	7.15e-05		T529	0	3.48314e-06	0	1.42978e-06	0	0	0	0	0	0.000110338	0	4.17712e-05	0	0	0	2.47712e-05
C529	1.00438e-05	2.38e-05	0	1.23e-05	3.72e-05	1.66688e-05		1.00339e-05	2.00848e-05	3.69e-05	4.81585e-05	1.32e-05	4.75e-05	2.84e-05	0	0	6.04e-05	0	0	2.61e-05	9.33e-05	1e-05	3.57e-05		C529	0	3.416e-06	2.02312e-05	3.14898e-05	0	3.08312e-05	1.17312e-05	0	0	4.37312e-05	0	0	9.43124e-06	7.66312e-05	0	1.90312e-05
A530	0.000112837	3.68e-05	0.000113915	0.000165191	5.16e-05	9.60685e-05		0.000100961	6.10575e-05	0.000114899	9.94308e-05	9.68e-05	9.85e-05	0.000102751	8.15e-05	9.77e-05	0.000125761	7.14e-05	6.64e-05	9.69e-05	8.44e-05	0.000122085	7.39e-05		A530	4.89261e-06	0	1.88305e-05	3.36222e-06	7.31457e-07	2.43146e-06	6.68246e-06	0	1.63146e-06	2.96925e-05	0	0	8.31457e-07	0	2.60165e-05	0
G530	5.12894e-05	0.000220989	0.000329089	0.00012707	0.000103227	0.000166333		2.01922e-05	3.05288e-05	8.94e-05	7.45731e-05	0.000138228	0.000123124	0.000161466	5.09e-05	0.000223364	0.000113185	5.1e-05	0.000146127	0.000193884	0.000168764	3.05e-05	0.000123204		G530	0	0	0	0	0	0	0	0	5.70311e-05	0	0	0	2.75511e-05	2.43112e-06	0	0
C530	0.00014361	0.000515641	2.53e-05	0.00041933	0.000464522	0.000313681		0.000191826	0.000152644	0.000574493	0.000671158	0.000663497	0.000775681	0.00055779	0.000326012	0.00058633	0.000402435	0.000183707	0.000571224	0.000733991	0.000626838	0.000305213	0.000689944		C530	0	0	0.000260812	0.000357477	0.000349816	0.000462	0.000244109	1.23313e-05	0.000272649	8.87543e-05	0	0.000257543	0.00042031	0.000313157	0	0.000376263
A531	0.000170774	0.000111894	8.8e-05	0.000154653	0.000183222	0.000141709		0.000261044	0.000291153	0.000180986	0.000151031	0.000126342	0.000174614	0.000133696	0.000160754	0.000155233	0.000229329	0.000231414	0.000202618	0.000169026	0.000195236	0.000160777	0.000261865		A531	0.000119336	0.000149444	3.92775e-05	9.32226e-06	0	3.29055e-05	0	1.90455e-05	1.35245e-05	8.76205e-05	8.97055e-05	6.09095e-05	2.73175e-05	5.35275e-05	1.90685e-05	0.000120156
T531	4.0182e-05	0.000111894	0.000226261	9.02e-05	6.54e-05	0.000106787		4.01606e-05	3.01193e-05	0.000142203	0.000138445	7.02e-05	3.74e-05	4.46e-05	5.02e-05	4.23e-05	8.92e-05	2.01e-05	6.75e-05	5.63e-05	6.1e-05	7.03e-05	0.000149637		T531	0	0	3.54156e-05	3.16575e-05	0	0	0	0	0	0	0	0	0	0	0	4.28496e-05
C531	2.0091e-05	0	0.000201121	0	0	4.42424e-05		1.00402e-05	0	0	1.25859e-05	0	1.25e-05	0	2.01e-05	0	1.27e-05	2.01e-05	0	0	0	0	1.25e-05		C531	0	0	0	0	0	0	0	0	0	0	0	0	0	0	0	0
A532	0.000240657	0.000210931	0.000151362	2.57e-05	0.000130603	0.000151851		0.000120383	9.02699e-05	6.46e-05	5.02885e-05	0	2.49e-05	4.45e-05	0.000110351	1.41e-05	6.36e-05	1e-05	5.4e-05	0	0	2.01e-05	8.72e-05		A532	0	0	0	0	0	0	0	0	0	0	0	0	0	0	0	0
T532	8.0219e-05	0.000148893	3.78e-05	0.000128541	9.14e-05	9.73706e-05		0.000110351	0.0002006	0.000116219	0.000138293	0.000182303	7.47e-05	0.000118737	0.000120383	5.63e-05	0.000114558	0.000140679	0.000161946	0.000140588	8.53e-05	0.000160502	0.00011214		T532	1.29803e-05	0.000103229	1.88484e-05	4.09229e-05	8.49324e-05	0	2.13664e-05	2.30124e-05	0	1.71874e-05	4.33084e-05	6.45754e-05	4.32174e-05	0	6.31314e-05	1.47694e-05
G532	2.00547e-05	1.24e-05	3.78e-05	2.57e-05	0	1.91909e-05		1.00319e-05	3.009e-05	0	0	1.4e-05	2.49e-05	1.48e-05	0	2.82e-05	1.27e-05	1e-05	2.7e-05	2.81e-05	0	0	0		G532	0	1.0899e-05	0	0	0	5.70905e-06	0	0	9.00905e-06	0	0	7.80905e-06	8.90905e-06	0	0	0
A533	5.01469e-05	1.24e-05	3.78e-05	0	2.61e-05	2.52894e-05		2.00443e-05	4.01196e-05	0.000219287	0	2.8e-05	3.73e-05	7.42e-05	5.02e-05	1.41e-05	3.8e-05	4.02e-05	0	2.8e-05	2.43e-05	4.01e-05	1.24e-05		A533	0	1.48302e-05	0.000193998	0	2.71061e-06	1.20106e-05	4.89106e-05	2.49106e-05	0	1.27106e-05	1.49106e-05	0	2.71061e-06	0	1.48106e-05	0
G533	1.00294e-05	2.48e-05	0.000201844	6.41e-05	3.91e-05	6.79747e-05		4.00886e-05	1.00299e-05	7.74e-05	2.51225e-05	2.8e-05	3.73e-05	4.45e-05	0	8.44e-05	5.07e-05	1e-05	0.000148027	0.000112183	9.74e-05	1e-05	2.49e-05		G533	0	0	9.42532e-06	0	0	0	0	0	1.64253e-05	0	0	8.00523e-05	4.42083e-05	2.94253e-05	0	0
C533	0.000401175	0.000235545	1.26e-05	0.000307854	0.000299948	0.000251424		0.000240532	0.000230687	0.000103194	0.000175857	0.000182103	0.000161679	0.000178068	0.000210661	9.84e-05	0.000152145	0.000180685	0.000148027	0.000140229	0.000292134	0.000190505	0.000211488		C533	0	0	0	0	0	0	0	0	0	0	0	0	0	4.07095e-05	0	0
A534	6.02301e-05	0.000111401	5.08e-05	5.12e-05	5.21e-05	6.51462e-05		5.01273e-05	5.01736e-05	2.57e-05	8.77974e-05	2.8e-05	2.49e-05	2.96e-05	6.02e-05	0	7.6e-05	9.04e-05	2.69e-05	1.4e-05	0.000109399	8.03e-05	2.48e-05		A534	0	0	0	2.26512e-05	0	0	0	0	0	1.08538e-05	2.52538e-05	0	0	4.42528e-05	1.51538e-05	0
G534	1.00383e-05	7.43e-05	0.00027945	0	3.91e-05	8.05777e-05		2.00509e-05	3.01042e-05	2.57e-05	0	5.59e-05	4.97e-05	1.48e-05	2.01e-05	2.81e-05	5.06e-05	1e-05	2.69e-05	5.6e-05	0	3.01e-05	3.73e-05		G534	0	0	0	0	0	0	0	0	0	0	0	0	0	0	0	0
C534	0	3.71e-05	0.000127023	0.000128067	7.81e-05	7.4058e-05		0.000180458	0.000240833	0.00030894	0.000188137	0.000195823	0.000335533	0.000162936	0.000170611	0.000112241	8.86e-05	0.000210881	9.4e-05	0.000167973	0.000243108	0.00016053	0.000211198		C534	0.0001064	0.000166775	0.000234882	0.000114079	0.000121765	0.000261475	8.8878e-05	9.6553e-05	3.8183e-05	1.4542e-05	0.000136823	1.9942e-05	9.3915e-05	0.00016905	8.6472e-05	0.00013714
A535	0.000100692	8.49e-05	2.51e-05	5.01e-05	7.62e-05	6.73984e-05		0.000170488	7.03447e-05	0.000150987	3.68818e-05	6.82e-05	8.5e-05	7.27e-05	0.000130704	0.00013734	7.42e-05	0.000100614	2.6e-05	8.11e-05	4.76e-05	0.000140689	0.000170609		A535	0.000103089	2.94634e-06	8.35886e-05	0	8.0165e-07	1.76016e-05	5.30165e-06	6.33056e-05	6.99416e-05	6.80165e-06	3.32156e-05	0	1.37016e-05	0	7.32906e-05	0.000103211
G535	0	0.000181999	7.53e-05	0.000200253	0.000215892	0.000134689		2.00574e-05	2.00985e-05	0.000213898	0.000172115	0.000109188	0.000218478	0.000116315	3.02e-05	0.000151074	0.000111294	1.01e-05	0.00020803	0.000162298	0.000166667	2.01e-05	0.000170609		G535	0	0	7.92092e-05	3.74261e-05	0	8.37892e-05	0	0	1.63852e-05	0	0	7.33412e-05	2.76092e-05	3.19782e-05	0	3.59202e-05
C535	7.04842e-05	7.28e-05	1.26e-05	0.000100126	6.35e-05	6.3902e-05		0.000170488	0.00026128	0.000138405	0.000233585	0.000218376	0.00015779	0.000159933	0.000180975	0.000302148	8.66e-05	0.000181105	0.000156022	0.000175823	5.95e-05	9.04e-05	0.000219354		C535	0.000106586	0.000197378	7.4503e-05	0.000169682	0.000154474	9.3888e-05	9.6031e-05	0.000117073	0.000238246	2.2698e-05	0.000117203	9.212e-05	0.000111921	0	2.6498e-05	0.000155452
T536	0.000110329	3.63e-05	8.86e-05	7.49e-05	0.000176969	9.74196e-05		0.000100237	8.0227e-05	0.000100253	3.67634e-05	9.51e-05	0.000157018	7.25e-05	9.03e-05	0.000136799	4.93e-05	6.02e-05	9.05e-05	5.38e-05	4.75e-05	6.02e-05	4.86e-05		T536	2.817e-06	0	2.83344e-06	0	0	5.95984e-05	0	0	3.93794e-05	0	0	0	0	0	0	0
G536	0.000210628	0.000145264	0.000291261	0.000174672	0.000139047	0.000192174		0.000370875	0.000340965	0.000363418	0.000232835	0.000190215	0.000277801	0.000115998	0.000230764	0.000136799	0.000221664	0.000220824	0.000374847	0.000201621	0.000237293	0.000250684	0.000170066		G536	0.000178701	0.000148791	0.000171244	4.06602e-05	0	8.56267e-05	0	3.85897e-05	0	2.94897e-05	2.86497e-05	0.000182673	9.44667e-06	4.51187e-05	5.85097e-05	0
C536	3.00897e-05	4.84e-05	0.000151962	1.25e-05	1.26e-05	5.11103e-05		2.00473e-05	1.00284e-05	1.25e-05	4.90178e-05	0	0	2.9e-05	4.01e-05	4.1e-05	6.16e-05	2.01e-05	0.000116332	2.69e-05	0	4.01e-05	1.21e-05		C536	0	0	0	0	0	0	0	0	0	1.04897e-05	0	6.52217e-05	0	0	0	0
T537	3.0238e-05	6.11e-05	5.02e-05	2.52e-05	6.39e-05	4.61276e-05		5.02195e-05	9.05496e-05	5.07e-05	3.71131e-05	0	6.1e-05	5.85e-05	6.04e-05	1.38e-05	7.47e-05	3.02e-05	5.24e-05	6.83e-05	0	5.03e-05	3.68e-05		T537	4.09186e-06	4.4422e-05	4.57241e-06	0	0	1.48724e-05	1.23724e-05	1.42724e-05	0	2.85724e-05	0	6.27241e-06	2.21724e-05	0	4.17241e-06	0
G537	0.000110873	0.000171009	5.02e-05	0.000138626	6.39e-05	0.000106922		0.000441931	0.000362199	0.000684038	0.000408244	0.000261449	0.000366162	0.000467891	0.000201286	0.000318172	0.00018682	0.000251887	0.000275352	0.000245737	0.000263454	0.000201171	0.000183909		G537	0.00033501	0.000255277	0.000577116	0.000301323	0.000154527	0.00025924	0.000360969	9.43645e-05	0.00021125	7.98985e-05	0.000144965	0.00016843	0.000138815	0.000156532	9.42495e-05	7.69875e-05
C537	3.0238e-05	6.11e-05	1.26e-05	8.82e-05	0.000102319	5.88914e-05		1.00439e-05	1.00611e-05	6.33e-05	0.00012371	0.000137605	6.1e-05	5.85e-05	4.03e-05	9.68e-05	0.000124547	4.03e-05	9.18e-05	0.000109217	4.79e-05	1.01e-05	6.13e-05		C537	0	0	4.40861e-06	6.48189e-05	7.87136e-05	2.10861e-06	0	0	3.79086e-05	6.56556e-05	0	3.29086e-05	5.03256e-05	0	0	2.40861e-06
A538	4.02265e-05	2.43e-05	0.000113203	2.51e-05	5.08e-05	5.07259e-05		2.00347e-05	9.03206e-05	0.00011341	6.15748e-05	6.84e-05	3.64e-05	8.74e-05	2.01e-05	1.37e-05	0	1e-05	3.91e-05	5.42e-05	0	2.01e-05	4.88e-05		A538	0	3.95947e-05	6.26841e-05	1.08489e-05	1.76741e-05	0	3.66741e-05	0	0	0	0	0	3.4741e-06	0	0	0
T538	0.000100566	0.000121589	5.03e-05	8.77e-05	0.000177859	0.000107603		0.000190329	0.000260926	0.00022682	0.000209354	0.000218815	0.000133605	0.000247496	0.000170662	8.25e-05	0.00023509	0.000140698	0.000195262	0.000121984	0.000190792	0.000170541	0.000146345		T538	8.27264e-05	0.000153323	0.000119217	0.000101752	0.000111212	2.60022e-05	0.000139893	6.30592e-05	0	0.000127487	3.30952e-05	8.76592e-05	1.43812e-05	8.31892e-05	6.29382e-05	3.87422e-05
G538	2.01132e-05	0	0	1.25e-05	1.27e-05	9.06265e-06		1.00173e-05	1.00356e-05	1.26e-05	0	1.37e-05	1.21e-05	1.46e-05	0	0	3.71e-05	2.01e-05	1.3e-05	0	0	0	3.66e-05		G538	9.54682e-07	9.72979e-07	3.53735e-06	0	4.63735e-06	3.03735e-06	5.53735e-06	0	0	2.80374e-05	1.10374e-05	3.93735e-06	0	0	0	2.75374e-05
A539	0.000111291	8.64e-05	6.34e-05	0.000140304	7.75e-05	9.5779e-05		0.00018105	0.000211685	0.000294611	0.000137567	9.79e-05	0.000247036	0.000118266	0.000242231	9.77e-05	0.000226706	0.00024252	0.00017262	0.000138976	0.000108963	0.000161512	0.000123841		A539	8.52711e-05	0.000115906	0.000198832	4.17881e-05	2.121e-06	0.000151257	2.2487e-05	0.000146452	1.921e-06	0.000130927	0.000146741	7.6841e-05	4.3197e-05	1.3184e-05	6.5733e-05	2.8062e-05
T539	3.03521e-05	7.41e-05	0.000126784	5.1e-05	7.75e-05	7.19472e-05		3.0175e-05	8.06419e-05	3.84e-05	1.25061e-05	5.6e-05	3.71e-05	0	3.03e-05	5.59e-05	3.78e-05	4.04e-05	0.000119506	0	4.84e-05	1.01e-05	3.72e-05		T539	0	8.69469e-06	0	0	0	0	0	0	0	0	0	4.75588e-05	0	0	0	0
C539	6.07042e-05	6.17e-05	0	2.55e-05	0	2.95808e-05		3.0175e-05	0	0	2.50122e-05	0	0	7.39e-05	3.03e-05	0	1.26e-05	2.02e-05	0	1.39e-05	3.63e-05	1.01e-05	1.24e-05		C539	5.94181e-07	0	0	0	0	0	4.43192e-05	7.19166e-07	0	0	0	0	0	6.71917e-06	0	0
T540	0.000131352	0.00017297	5.08e-05	0.000127569	3.88e-05	0.000104298		8.04117e-05	8.05859e-05	6.42e-05	0.000100197	0.000140097	6.18e-05	2.96e-05	2.01e-05	8.39e-05	8.83e-05	0.000100889	3.99e-05	9.75e-05	0.000133251	0.000120761	9.91e-05		T540	0	0	0	0	3.57989e-05	0	0	0	0	0	0	0	0	2.89529e-05	1.64629e-05	0
G540	0.000121248	0.00012355	8.88e-05	6.38e-05	0.00016813	0.000113106		0.000190978	0.000292124	0.000205355	0.000363213	5.6e-05	0.00014822	0.000369833	0.000271892	0.000167752	0.000151366	0.000211867	0.000146312	0.000236706	0.000327071	0.000171078	0.000210576		G540	7.78723e-05	0.000179018	9.22495e-05	0.000250107	0	3.51145e-05	0.000256727	0.000158786	5.46465e-05	3.82605e-05	9.87615e-05	3.32065e-05	0.0001236	0.000213965	5.79725e-05	9.74705e-05
C540	0	4.94e-05	0.000203056	5.1e-05	2.59e-05	6.58712e-05		3.01544e-05	3.02197e-05	1.28e-05	1.25246e-05	2.8e-05	0.00014822	5.92e-05	4.03e-05	9.79e-05	0.000100911	2.02e-05	5.32e-05	2.78e-05	0	2.01e-05	3.72e-05		C540	0	0	0	0	0	8.23488e-05	0	0	3.20288e-05	3.50398e-05	0	0	0	0	0	0
T541	4.03344e-05	7.46e-05	0.000101832	7.72e-05	6.52e-05	7.18333e-05		4.03071e-05	8.05826e-05	2.58e-05	7.54745e-05	7.05e-05	0	0.000118894	6.05e-05	5.64e-05	6.36e-05	3.03e-05	2.68e-05	5.63e-05	4.88e-05	6.05e-05	9.98e-05		T541	0	8.74934e-06	0	3.64127e-06	0	0	4.70607e-05	0	0	0	0	0	0	0	0	2.79667e-05
G541	0.000161337	4.97e-05	6.36e-05	0.00014159	9.13e-05	0.000101505		0.000261996	0.00032233	0.000516562	0.000402531	0.000310314	0.000286198	0.000178341	0.000252034	0.000295916	0.000152748	0.000262632	0.000308563	0.000450571	0.000329244	0.000282102	0.000361849		G541	0.000160491	0.000220825	0.000415057	0.000301025	0.000208809	0.000184693	7.68355e-05	0.000150529	0.000194411	5.12425e-05	0.000161127	0.000207058	0.000349066	0.000227739	0.000180597	0.000260344
C541	5.0418e-05	8.7e-05	1.27e-05	0.000115847	9.13e-05	7.1453e-05		0.000100768	7.05098e-05	0.000103312	2.51582e-05	0.000112841	9.95e-05	0.000148617	4.03e-05	0.000126821	8.91e-05	5.05e-05	0.000120742	0.000140803	8.54e-05	8.06e-05	0.000112298		C541	2.93149e-05	0	3.1859e-05	0	4.1388e-05	2.8047e-05	7.7164e-05	0	5.5368e-05	1.7647e-05	0	4.9289e-05	6.935e-05	1.3947e-05	9.14701e-06	4.0845e-05
A542	2.01412e-05	2.49e-05	3.85e-05	0.00010268	2.61e-05	4.24642e-05		0.000100364	5.0274e-05	9.05e-05	7.55944e-05	8.48e-05	6.22e-05	2.98e-05	5.03e-05	1.41e-05	8.89e-05	8.06e-05	4.03e-05	7.05e-05	3.66e-05	4.02e-05	2.5e-05		A542	5.79001e-05	7.80976e-06	4.80358e-05	3.31301e-05	4.23358e-05	1.97358e-05	0	7.83576e-06	0	4.64358e-05	3.81358e-05	0	2.80358e-05	0	0	0
T542	0.000211482	0.000186574	0.000166662	0.00010268	0.000182567	0.000169993		0.000411494	0.000351918	0.000181035	0.000163788	0.000324895	0.000199099	0.00011911	0.000191133	0.000281563	0.000190486	0.000211474	0.000201475	0.000169276	0.000207451	0.000291721	0.000199743		T542	0.000241501	0.000181925	1.10419e-05	0	0.000154902	2.91059e-05	0	2.11399e-05	0.00011157	2.04929e-05	4.14809e-05	3.14819e-05	0	3.74579e-05	0.000121728	2.97499e-05
G542	1.00706e-05	0	3.85e-05	1.28e-05	0	1.22741e-05		4.01457e-05	1.00548e-05	0	2.51981e-05	0	2.49e-05	0	2.01e-05	2.82e-05	2.54e-05	2.01e-05	0	1.41e-05	0	2.01e-05	3.75e-05		G542	2.78716e-05	0	0	1.2924e-05	0	1.26259e-05	0	7.82588e-06	1.59259e-05	1.31259e-05	7.82588e-06	0	1.82588e-06	0	7.82588e-06	2.52259e-05
A543	0.000180743	0.000111696	2.59e-05	0.000154059	0.000117152	0.00011791		0.000270913	0.000200729	0.000129056	0.000151082	0.000239524	0.000223383	0.000193346	0.000190673	0.000182736	0.00017755	0.00019106	0.000173978	0.00014042	0.000170482	0.000150562	8.71e-05		A543	0.000153003	8.28187e-05	1.1146e-05	3.31722e-05	0.000121614	0.000105473	7.5436e-05	7.2763e-05	6.4826e-05	5.964e-05	7.315e-05	5.6068e-05	2.251e-05	5.2572e-05	3.2652e-05	0
T543	6.02476e-05	1.24e-05	9.08e-05	6.42e-05	3.91e-05	5.33495e-05		9.03043e-05	2.00729e-05	5.16e-05	5.03607e-05	5.64e-05	0.000111692	2.97e-05	4.01e-05	4.22e-05	0.000114139	5.03e-05	4.01e-05	4.21e-05	7.31e-05	6.02e-05	3.73e-05		T543	3.69548e-05	0	0	0	3.05048e-06	5.83425e-05	0	0	0	6.07895e-05	0	0	0	1.97505e-05	6.85048e-06	0
C543	0	2.48e-05	0.000103759	6.42e-05	2.6e-05	4.37518e-05		1.00338e-05	3.01093e-05	9.03e-05	2.51804e-05	0	1.24e-05	0	2.01e-05	1.41e-05	1.27e-05	3.02e-05	0	1.4e-05	1.22e-05	3.01e-05	3.73e-05		C543	0	0	4.65482e-05	0	0	0	0	0	0	0	0	0	0	0	0	0
A544	6.04144e-05	3.75e-05	5.22e-05	0.000155535	7.89e-05	7.69099e-05		1.00443e-05	0	3.9e-05	3.80281e-05	5.7e-05	2.5e-05	4.49e-05	9.06e-05	5.66e-05	7.69e-05	5.04e-05	4.06e-05	4.27e-05	6.13e-05	2.01e-05	3.76e-05		A544	0	0	0	0	0	0	0	1.36901e-05	0	0	0	0	0	0	0	0
T544	0.00011076	7.5e-05	0.000169611	1.3e-05	0.000157756	0.000105225		5.02215e-05	9.05169e-05	7.8e-05	0.00012676	0.000128203	3.76e-05	8.98e-05	0.000120751	9.91e-05	0.000128108	0.000110975	0.000148926	0.000113767	0.000147171	9.06e-05	0.000112906		T544	0	0	0	2.1535e-05	2.29776e-05	0	0	1.55256e-05	0	2.28826e-05	5.74964e-06	4.37006e-05	8.54164e-06	4.19456e-05	0	7.68064e-06
G544	0	0	0.000156564	1.3e-05	0	3.39128e-05		0	4.02297e-05	0	1.2676e-05	0	1.25e-05	0	2.01e-05	1.42e-05	1.28e-05	1.01e-05	2.71e-05	0	2.45e-05	3.02e-05	1.25e-05		G544	0	6.31691e-06	0	0	0	0	0	0	0	0	0	0	0	0	0	0
A545	8.0773e-05	0.000100236	6.49e-05	0.0001428	3.96e-05	8.56618e-05		0.000100828	9.07954e-05	3.91e-05	0.000114386	2.85e-05	8.78e-05	7.5e-05	0.000111198	8.53e-05	5.14e-05	8.11e-05	6.78e-05	0.000127908	8.61e-05	6.06e-05	6.29e-05		A545	1.5166e-05	5.13357e-06	0	2.87241e-05	0	2.1382e-06	0	2.55362e-05	0	0	0	0	4.22462e-05	4.382e-07	0	0
G545	3.02899e-05	6.26e-05	6.49e-05	0.000116836	2.64e-05	6.02052e-05		1.00828e-05	3.02651e-05	2.61e-05	2.54191e-05	5.7e-05	8.78e-05	6e-05	1.01e-05	0.000113688	2.57e-05	6.08e-05	9.49e-05	0.000113696	2.46e-05	5.05e-05	8.81e-05		G545	0	0	0	0	0	2.75948e-05	0	0	5.34828e-05	0	5.94825e-07	3.46948e-05	5.34908e-05	0	0	2.78948e-05
C545	0.000111063	0.000125294	2.6e-05	0.000103854	5.27e-05	8.37822e-05		0.000201656	0.00037327	0.000117339	0.000254191	0.000270779	0.000313413	0.000165004	0.000252722	0.000255798	0.000102813	0.000182539	0.000217002	0.000241604	0.000196708	0.000191851	0.00010063		C545	0.000117873	0.000289488	3.35568e-05	0.000170409	0.000186997	0.000229631	8.12218e-05	0.00016894	0.000172016	1.90308e-05	9.87568e-05	0.00013322	0.000157822	0.000112926	0.000108069	1.68478e-05
A546	0.000150699	2.49e-05	5.44e-05	0.00011612	0.000131048	9.54334e-05		3.01338e-05	0.000110583	0.000168226	0.000113692	9.92e-05	0.000137248	0.000119421	4.02e-05	2.82e-05	0.000140195	0.00010078	0.000188448	1.41e-05	7.34e-05	0.000140739	8.77e-05		A546	0	1.51493e-05	7.27926e-05	1.82589e-05	3.76655e-06	4.18146e-05	2.39876e-05	0	0	4.47616e-05	5.34655e-06	9.30146e-05	0	0	4.53056e-05	0
T546	8.03729e-05	0.000149469	0.00013599	0.000167729	0.000248991	0.00015651		0.000231026	0.000241272	0.000232928	8.84274e-05	9.92e-05	0.000199633	0.000223914	0.000140705	0.000141074	0.000191175	0.000181404	0.000161527	5.65e-05	0.000110076	0.000221161	0.000162779		T546	7.45154e-05	8.47611e-05	7.64176e-05	0	0	4.31226e-05	6.74036e-05	0	0	3.46646e-05	2.48936e-05	5.01661e-06	0	0	6.46506e-05	6.26861e-06
G546	1.00466e-05	2.49e-05	0.000353573	1.29e-05	5.24e-05	9.07639e-05		1.00446e-05	1.0053e-05	5.18e-05	5.05299e-05	1.42e-05	6.24e-05	2.99e-05	4.02e-05	2.82e-05	2.55e-05	0	2.69e-05	2.82e-05	2.45e-05	8.04e-05	0		G546	0	0	0	0	0	0	0	0	0	0	0	0	0	0	0	0
A547	8.03181e-05	0.000161382	0.000138164	0.00010242	9.1e-05	0.000114657		0.000200763	9.03542e-05	0.000193262	0.000214152	0.00014108	0.000211261	5.95e-05	0.000140647	8.41e-05	0.00017735	0.000160908	0.00022741	0.000154118	0.0001097	0.000150661	8.73e-05		A547	8.61061e-05	0	7.86052e-05	9.94948e-05	2.64232e-05	9.66042e-05	0	2.59902e-05	0	6.26932e-05	4.62512e-05	0.000112753	3.94612e-05	0	3.60042e-05	0
T547	4.0159e-05	3.72e-05	5.53e-05	5.12e-05	2.6e-05	4.19718e-05		5.01907e-05	3.01181e-05	2.58e-05	0	5.64e-05	6.21e-05	7.44e-05	2.01e-05	5.61e-05	8.87e-05	6.03e-05	1.34e-05	4.2e-05	6.09e-05	2.01e-05	4.99e-05		T547	8.21892e-06	0	0	0	1.44282e-05	2.01282e-05	3.24282e-05	0	1.41282e-05	4.67282e-05	1.83282e-05	0	2.8194e-08	1.89282e-05	0	7.92819e-06
C547	2.00795e-05	0	1.38e-05	3.84e-05	1.3e-05	1.70559e-05		1.00381e-05	1.00394e-05	1.29e-05	3.77915e-05	0	0	0	3.01e-05	0	5.07e-05	4.02e-05	1.34e-05	0	1.22e-05	2.01e-05	0		C547	0	0	0	2.07356e-05	0	0	0	1.30441e-05	0	3.36441e-05	2.31441e-05	0	0	0	3.0441e-06	0
A548	5.03388e-05	0.000112416	0.000234428	2.58e-05	2.63e-05	8.98566e-05		9.06253e-05	9.06208e-05	5.19e-05	0.00011393	8.53e-05	0.000137622	0.000119594	8.06e-05	0.000113071	6.38e-05	0.000101033	6.75e-05	0.000113154	2.45e-05	0.000130992	2.51e-05		A548	7.68759e-07	7.64196e-07	0	2.40733e-05	0	4.77654e-05	2.97374e-05	0	2.32144e-05	0	1.11764e-05	0	2.32974e-05	0	4.11354e-05	0
G548	9.06098e-05	7.49e-05	8.27e-05	9.02e-05	0.000105025	8.8687e-05		1.00695e-05	4.02759e-05	5.19e-05	3.79766e-05	9.95e-05	8.76e-05	0	3.02e-05	4.24e-05	0.000127644	3.03e-05	0.00012151	0.000113154	7.36e-05	5.04e-05	2.51e-05		G548	0	0	0	0	1.0813e-05	0	0	0	0	3.8957e-05	0	3.2823e-05	2.4467e-05	0	0	0
C548	0.000120813	0.000224831	0	3.87e-05	0.000170666	0.000111002		0.000281945	0.000171173	0.000129698	0.000278495	0.000184814	0.000350311	0.000239188	0.000191438	7.07e-05	0.000191466	0.000101033	0.00024302	9.9e-05	0.000196143	0.000201526	0.000250985		C548	0.000170943	6.01705e-05	1.8696e-05	0.000167493	7.3812e-05	0.000239309	0.000128186	8.0436e-05	0	8.0464e-05	0	0.000132018	0	8.5141e-05	9.0524e-05	0.000139983
A549	6.04236e-05	1.25e-05	2.75e-05	6.45e-05	6.56e-05	4.61047e-05		4.02362e-05	5.03428e-05	3.89e-05	2.53097e-05	2.84e-05	3.75e-05	0	3.02e-05	2.82e-05	5.1e-05	2.02e-05	4.04e-05	2.83e-05	3.67e-05	5.04e-05	6.27e-05		A549	0	4.23812e-06	0	0	0	0	0	0	0	4.89529e-06	0	0	0	0	4.29529e-06	1.65953e-05
T549	8.05648e-05	8.73e-05	8.26e-05	9.03e-05	2.62e-05	7.3393e-05		7.04133e-05	0.000100686	2.59e-05	0.000202478	0.000113669	3.75e-05	0.000134463	8.06e-05	0.00012711	3.83e-05	7.07e-05	5.39e-05	7.07e-05	7.35e-05	8.06e-05	6.27e-05		T549	0	2.72927e-05	0	0.000129085	4.0276e-05	0	6.107e-05	7.20705e-06	5.3717e-05	0	0	0	0	1.07048e-07	7.20705e-06	0
G549	1.00706e-05	2.49e-05	0.000165135	3.87e-05	2.62e-05	5.30011e-05		3.01771e-05	1.00686e-05	0	0	1.42e-05	3.75e-05	2.99e-05	3.02e-05	4.24e-05	2.55e-05	0	1.35e-05	1.41e-05	6.12e-05	1.01e-05	0		G549	0	0	0	0	0	0	0	0	0	0	0	0	0	8.19888e-06	0	0
A550	0.000100632	9.98e-05	8.24e-05	9.05e-05	6.57e-05	8.78064e-05		7.03454e-05	0.000130783	3.89e-05	3.79829e-05	5.68e-05	2.5e-05	8.97e-05	8.06e-05	5.66e-05	6.39e-05	8.08e-05	5.38e-05	7.06e-05	6.13e-05	4.03e-05	6.26e-05		A550	0	4.2977e-05	0	0	0	0	1.89361e-06	0	0	0	0	0	0	0	0	0
G550	7.04424e-05	0.000336679	4.12e-05	0.000323081	0.000367826	0.000227846		1.00493e-05	4.0241e-05	0.00041476	0.00039249	0.00029802	0.000462136	0.000403775	1.01e-05	0.00041019	0.000434733	4.04e-05	0.000565169	0.000508604	0.000404402	4.03e-05	0.000313095		G550	0	0	0.000186914	0.000164644	7.01743e-05	0.00023429	0.000175929	0	0.000182344	0.000206887	0	0.000337323	0.000280758	0.000176556	0	8.52493e-05
C550	0.000120758	0.000211983	8.24e-05	0.000245541	0.000210186	0.000174174		0.000281382	0.000231386	0.000440683	0.000455794	0.000340595	0.000399685	0.000433684	0.000251775	0.000183878	0.000179008	0.000242512	0.000174933	0.000367325	0.000183819	0.000140892	0.000200381		C550	0.000107208	5.72123e-05	0.000266509	0.000281621	0.000166421	0.000225511	0.00025951	7.76013e-05	9.70433e-06	4.83433e-06	6.83383e-05	7.59327e-07	0.000193151	9.64533e-06	0	2.62073e-05
A551	3.01199e-05	2.48e-05	0.000119667	5.12e-05	5.2e-05	5.55574e-05		6.01727e-05	6.02156e-05	2.57e-05	7.54916e-05	2.82e-05	8.69e-05	0	7.03e-05	5.61e-05	6.33e-05	4.02e-05	2.67e-05	4.2e-05	3.65e-05	0.000140555	3.74e-05		A551	4.61532e-06	4.6582e-06	0	1.99343e-05	0	3.13426e-05	0	1.47426e-05	5.42625e-07	7.74262e-06	0	0	0	0	8.49976e-05	0
T551	7.02797e-05	7.45e-05	0.000199444	3.84e-05	6.5e-05	8.95247e-05		0.000110317	0.000110395	9e-05	0.000226475	2.82e-05	6.2e-05	2.98e-05	0.000130527	7.02e-05	5.07e-05	7.04e-05	0	7e-05	7.31e-05	6.02e-05	4.99e-05		T551	2.07919e-05	2.08705e-05	4.75257e-07	0.00013695	0	0	0	4.10023e-05	0	0	0	0	0	0	0	0
G551	1.004e-05	0	0.000119667	1.28e-05	2.6e-05	3.37014e-05		3.00863e-05	2.00719e-05	3.86e-05	0	2.82e-05	2.48e-05	0	3.01e-05	1.4e-05	1.27e-05	0	1.34e-05	1.4e-05	2.44e-05	3.01e-05	1.25e-05		G551	0	0	4.89861e-06	0	0	0	0	0	0	0	0	0	0	0	0	0
A552	2.01225e-05	3.73e-05	1.32e-05	0.00014102	9.1e-05	6.05285e-05		0.000120521	9.04096e-05	2.57e-05	1.25943e-05	7.06e-05	7.46e-05	0.000104355	4.02e-05	2.81e-05	0.000164505	5.04e-05	8.01e-05	9.82e-05	0.00010974	9.05e-05	0.000125008		A552	5.99921e-05	2.9881e-05	0	0	1.00715e-05	1.40715e-05	4.38265e-05	0	0	0.000103976	0	1.95715e-05	3.76715e-05	4.92115e-05	2.99715e-05	6.44795e-05
G552	3.01838e-05	3.73e-05	0.000224847	8.97e-05	6.5e-05	8.94062e-05		3.01302e-05	1.00455e-05	1.29e-05	5.03772e-05	1.41e-05	6.21e-05	7.45e-05	3.02e-05	5.61e-05	5.06e-05	2.02e-05	6.68e-05	8.42e-05	3.66e-05	2.01e-05	7.5e-05		G552	0	0	0	0	0	0	0	0	0	0	0	0	0	0	0	0
C552	0.000171042	0.000261035	3.97e-05	0.00017948	0.000195089	0.000169269		0.000331432	0.000321456	0.000373245	0.000403018	0.000395558	0.000323058	0.00026834	0.00026148	0.000238593	0.000139196	0.000191528	0.00012022	0.000210376	0.000377993	0.000352081	0.00032502		C552	0.000162163	0.000152187	0.000203976	0.000233748	0.000226289	0.000153789	9.90709e-05	9.22109e-05	6.93239e-05	0	2.22589e-05	0	4.11069e-05	0.000208724	0.000182812	0.000155751
T553	0.000151258	6.24e-05	5.37e-05	5.14e-05	0.000130538	8.98593e-05		7.04013e-05	8.06151e-05	0.000116414	0.000113852	5.68e-05	7.49e-05	4.5e-05	0.000100748	0.000211324	0.000127115	6.06e-05	5.38e-05	0.00011288	7.34e-05	9.06e-05	0.000163013		T553	0	0	2.65547e-05	2.39927e-05	0	0	0	1.08887e-05	0.000121465	3.72557e-05	0	0	2.30207e-05	0	7.40706e-07	7.31537e-05
G553	0.000151258	0.000162236	0.000134174	0	0.000143592	0.000118252		0.00030172	0.000312383	0.000258699	0.000316256	0.000227221	0.000249535	0.00017981	0.000151121	0.000239501	0.000165249	0.000211988	0.000174795	0.000141099	0.000281308	0.000140983	0.00025079		G553	0.000183468	0.000194131	0.000140447	0.000198003	0.000108969	0.000131283	6.15579e-05	3.28689e-05	0.000121249	4.69969e-05	9.37359e-05	5.65429e-05	2.28469e-05	0.000163056	2.27309e-05	0.000132538
C553	3.02517e-05	3.74e-05	0.000107339	5.14e-05	3.92e-05	5.31181e-05		8.04586e-05	2.01538e-05	2.59e-05	0.000113852	9.94e-05	3.74e-05	4.5e-05	2.01e-05	9.86e-05	6.36e-05	4.04e-05	5.38e-05	1.41e-05	2.45e-05	7.05e-05	2.51e-05		C553	2.73405e-05	0	0	6.07339e-05	4.62819e-05	0	0	0	4.54819e-05	1.04819e-05	0	6.81861e-07	0	0	1.73819e-05	0
A554	0.000120376	0.000124861	0	0.000167179	0.000130502	0.000108584		0.000110358	0.000150465	5.17e-05	0.000113927	0.000142106	7.49e-05	0.000119987	0.000180779	1.41e-05	0.000101663	0.000100568	0.00013438	7.05e-05	0.000159109	8.03e-05	0.000100384		A554	1.77404e-06	4.18814e-05	0	5.34342e-06	3.35225e-05	0	1.14035e-05	7.21955e-05	0	0	0	2.57965e-05	0	5.05255e-05	0	0
G554	1.00313e-05	1.25e-05	0.00011988	2.57e-05	1.31e-05	3.62423e-05		1.00325e-05	1.0031e-05	2.59e-05	0	1.42e-05	1.25e-05	1.5e-05	4.02e-05	4.23e-05	1.27e-05	2.01e-05	2.69e-05	1.41e-05	7.34e-05	0	0		G554	0	0	0	0	0	0	0	3.95774e-06	6.05774e-06	0	0	0	0	3.71577e-05	0	0
C554	0.000120376	0.000124861	1.33e-05	0.000141459	7.83e-05	9.56591e-05		0.00024078	0.000270837	0.00014229	0.000379756	0.000198948	0.00019972	0.000134985	0.000210909	0.000126766	0.000101663	0.000110625	0.000120942	5.64e-05	0.000244783	0.000180663	0.000112932		C554	0.000145121	0.000175178	4.66309e-05	0.000284097	0.000103289	0.000104061	3.93259e-05	0.00011525	3.11069e-05	6.00389e-06	1.49659e-05	2.52829e-05	0	0.000149124	8.50039e-05	1.72729e-05
T555	9.09514e-05	7.48e-05	8.15e-05	6.42e-05	1.3e-05	6.48903e-05		4.0237e-05	7.06122e-05	3.87e-05	0	2.83e-05	6.23e-05	5.99e-05	4.04e-05	4.22e-05	1.27e-05	1.01e-05	2.68e-05	4.21e-05	3.66e-05	6.05e-05	6.26e-05		T555	0	5.72194e-06	0	0	0	0	0	0	0	0	0	0	0	0	0	0
G555	0.000232431	0.00016199	4.08e-05	0.000166795	0.00015636	0.000151675		0.000352074	0.000423673	0.000257951	0.000404331	0.000269225	0.000211888	0.000419187	0.000262597	0.000154731	0.000304171	0.000263009	0.000187336	0.000350769	0.000232053	0.000272315	0.000312864		G555	0.000200398	0.000271998	0.000106276	0.000252656	0.00011755	6.02128e-05	0.000267512	0.000110922	3.05575e-06	0.000152496	0.000111334	3.56608e-05	0.000199094	8.03778e-05	0.00012064	0.000161189
C555	7.07399e-05	0.000261676	0	0.000359251	0.00037787	0.000213907		3.01777e-05	5.04373e-05	0.000257951	0.000328519	0.000396752	0.000274208	0.000374274	5.05e-05	0.000295396	0.000139412	2.02e-05	0.000361291	0.000224492	0.000305332	3.03e-05	0.000287835		C555	0	0	4.40436e-05	0.000114612	0.000182845	6.03006e-05	0.000160367	0	8.14886e-05	0	0	0.000147384	1.05846e-05	9.14246e-05	0	7.39276e-05
A556	5.01178e-05	0.000125153	8.15e-05	0.00016753	3.93e-05	9.27202e-05		0.000170433	7.01867e-05	9.08e-05	8.88133e-05	0.000156814	0.00020021	7.52e-05	0.000110359	9.87e-05	8.91e-05	9.04e-05	0.000121235	0.000141117	0.000110309	9.03e-05	0.000138306		A556	7.77127e-05	0	0	0	6.40938e-05	0.00010749	0	1.76388e-05	5.97984e-06	0	0	2.85148e-05	4.83968e-05	1.75888e-05	0	4.55858e-05
T556	4.00942e-05	6.26e-05	0.000163086	9.02e-05	7.85e-05	8.6896e-05		0.000100255	8.02134e-05	6.48e-05	8.88133e-05	5.7e-05	0	4.51e-05	5.02e-05	7.05e-05	7.63e-05	3.01e-05	0.000134706	7.06e-05	6.13e-05	7.02e-05	0.000125732		T556	1.33586e-05	0	0	1.91728e-06	0	0	0	0	0	0	0	4.781e-05	0	0	0	3.8836e-05
C556	0	0	6.8e-05	1.29e-05	2.62e-05	2.142e-05		1.00255e-05	0	0	0	1.43e-05	1.25e-05	4.51e-05	2.01e-05	1.41e-05	6.36e-05	2.01e-05	1.35e-05	2.82e-05	3.68e-05	2.01e-05	0		C556	0	0	0	0	0	0	2.368e-05	0	0	4.218e-05	0	0	6.78e-06	1.538e-05	0	0
A557	0.000121341	3.77e-05	9.61e-05	7.78e-05	5.26e-05	7.71082e-05		0.000150816	9.07313e-05	2.61e-05	0.000344502	7.17e-05	7.55e-05	4.54e-05	0.000121078	4.25e-05	0.00010235	0.000181991	8.13e-05	0.000127723	0.000123101	9.08e-05	0.000164175		A557	7.37078e-05	1.36231e-05	0	0.000267394	0	0	0	4.39698e-05	0	2.52418e-05	0.000104883	4.19184e-06	5.06148e-05	4.59928e-05	1.36918e-05	8.70668e-05
T557	7.07821e-05	7.54e-05	0.000164666	7.78e-05	5.26e-05	8.82496e-05		0.000120653	0.000100813	7.83e-05	8.93153e-05	2.87e-05	2.52e-05	7.56e-05	7.06e-05	5.67e-05	7.68e-05	5.06e-05	5.42e-05	0.000170297	4.92e-05	7.06e-05	3.79e-05		T557	3.24031e-05	1.25629e-05	0	1.06571e-06	0	0	0	0	0	0	0	0	8.20474e-05	0	0	0
C557	3.03352e-05	2.51e-05	0.000123499	1.3e-05	5.26e-05	4.89068e-05		1.00544e-05	3.02438e-05	2.61e-05	3.8278e-05	4.3e-05	1.26e-05	0	1.01e-05	2.84e-05	3.84e-05	4.04e-05	1.36e-05	0	1.23e-05	3.03e-05	0		C557	0	0	0	0	0	0	0	0	0	0	0	0	0	0	0	0
A558	0	2.51e-05	4.12e-05	7.78e-05	0.000131562	5.51324e-05		7.02974e-05	0.000120533	1.3e-05	7.64341e-05	8.6e-05	3.77e-05	6.04e-05	7.04e-05	8.5e-05	6.4e-05	4.03e-05	6.78e-05	7.1e-05	4.92e-05	6.03e-05	0.00010096		A558	1.5165e-05	6.54004e-05	0	2.13017e-05	3.08676e-05	0	5.2676e-06	1.52676e-05	2.98676e-05	8.8676e-06	0	1.26676e-05	1.58676e-05	0	5.1676e-06	4.58276e-05
T558	0.000170791	0.000163335	0.000178395	0.000194404	0.000157874	0.00017296		0.00020085	0.000190844	0.000156232	0.00012739	0.000186343	0.000276424	0.000120815	0.00018097	0.000226651	0.000153604	0.000181263	0.000108463	0.000113525	9.83e-05	0.000110558	0.0001262		T558	2.78898e-05	1.78838e-05	0	0	1.33832e-05	0.000103464	0	8.01025e-06	5.36912e-05	0	8.30325e-06	0	0	0	0	0
G558	5.02326e-05	2.51e-05	1.37e-05	0	2.63e-05	2.30665e-05		0	4.01776e-05	0	1.2739e-05	1.43e-05	2.51e-05	0	1.01e-05	1.42e-05	2.56e-05	3.02e-05	0	0	1.23e-05	0	1.26e-05		G558	0	1.71111e-05	0	0	0	2.03348e-06	0	0	0	2.53348e-06	7.13348e-06	0	0	0	0	0
A559	3.05676e-05	7.53e-05	0.00012318	0.000116585	5.26e-05	7.96465e-05		6.05914e-05	5.08006e-05	5.2e-05	7.63524e-05	8.59e-05	3.76e-05	0	3.05e-05	7.08e-05	6.39e-05	5.09e-05	4.06e-05	7.09e-05	1.23e-05	3.04e-05	3.78e-05		A559	0	0	0	0	6.25347e-06	0	0	0	0	0	0	0	0	0	0	0
T559	8.15137e-05	0.000163198	4.11e-05	5.18e-05	5.26e-05	7.80423e-05		0.000131281	0.000152402	0.000104056	0.000178156	4.29e-05	0.000175676	6.04e-05	0.000111691	0.000170025	2.56e-05	0.000122054	6.77e-05	8.51e-05	8.6e-05	0.000121767	0.000176554		T559	5.3239e-05	7.43595e-05	2.60137e-05	0.000100113	0	9.76337e-05	0	3.36487e-05	9.19827e-05	0	4.40117e-05	0	7.05766e-06	7.95766e-06	4.37247e-05	9.85117e-05
G559	1.01892e-05	8.79e-05	0	2.59e-05	6.58e-05	3.79578e-05		1.00986e-05	4.06405e-05	3.9e-05	5.09016e-05	5.72e-05	7.53e-05	6.04e-05	3.05e-05	0.00011335	5.11e-05	2.03e-05	2.71e-05	9.93e-05	6.14e-05	1.01e-05	0.000100888		G559	0	2.68265e-06	1.04216e-06	1.29438e-05	1.92422e-05	3.73422e-05	2.24422e-05	0	7.53922e-05	1.31422e-05	0	0	6.13422e-05	2.34422e-05	0	6.29302e-05
A560	7.14453e-05	8.79e-05	0.000110592	5.19e-05	6.59e-05	7.75475e-05		6.05425e-05	7.11187e-05	9.12e-05	5.09366e-05	7.16e-05	8.79e-05	3.02e-05	9.16e-05	5.68e-05	7.67e-05	5.1e-05	0.000108304	1.42e-05	8.59e-05	4.06e-05	8.83e-05		A560	0	0	1.36525e-05	0	0	1.03525e-05	0	1.40525e-05	0	0	0	3.07565e-05	0	8.35253e-06	0	1.07525e-05
G560	4.08259e-05	7.54e-05	0.000124416	0.00012975	0.000105421	9.51626e-05		7.06329e-05	5.07991e-05	0.000143341	3.82024e-05	8.59e-05	7.53e-05	4.53e-05	3.05e-05	7.1e-05	8.95e-05	3.06e-05	0.00013538	0.00011343	2.46e-05	9.14e-05	7.57e-05		G560	0	0	4.81784e-05	0	0	0	0	0	0	0	0	4.02174e-05	1.82674e-05	0	0	0
C560	0.000357227	0.000314007	0	0.000233551	0.000303086	0.000241574		0.000423797	0.000507991	0.000416992	0.000662176	0.000443649	0.000301284	0.000256526	0.000396805	0.000298249	0.000358075	0.000326194	0.000365527	0.000297754	0.000331439	0.000457048	0.000466783		C560	0.000182223	0.000266417	0.000175418	0.000420602	0.000202075	5.97099e-05	1.49519e-05	0.000155231	5.66749e-05	0.000116501	8.46199e-05	0.000123953	5.61799e-05	8.98649e-05	0.000215474	0.000225209
A561	0.000161084	9.95e-05	0.000111036	7.68e-05	0.000155868	0.000120858		0.000191255	0.000201325	0.000167172	0.000251896	0.00022514	0.000136515	0.000284265	0.000110808	0.000266483	0.00022739	0.000131257	0.000173248	0.000139439	0.000182329	0.000161139	0.000212086		A561	7.0397e-05	8.04671e-05	4.63144e-05	0.000131038	0.000104282	1.56574e-05	0.000163407	0	0.000145625	0.000106532	1.03994e-05	5.23904e-05	1.85814e-05	6.14714e-05	4.02814e-05	9.12284e-05
T561	7.04743e-05	3.73e-05	0.000138794	5.12e-05	6.49e-05	7.25337e-05		0.00010066	5.03312e-05	2.57e-05	1.25948e-05	7.04e-05	3.72e-05	2.99e-05	4.03e-05	2.81e-05	7.58e-05	3.03e-05	1.33e-05	5.58e-05	7.29e-05	2.01e-05	2.5e-05		T561	2.81267e-05	0	0	0	0	0	0	0	0	3.26634e-06	0	0	0	3.66342e-07	0	0
C561	1.00678e-05	3.73e-05	9.72e-05	0	5.2e-05	3.93136e-05		1.0066e-05	0	3.86e-05	0	1.41e-05	0	1.5e-05	1.01e-05	1.4e-05	0	0	2.67e-05	0	2.43e-05	1.01e-05	6.24e-05		C561	0	0	0	0	0	0	0	0	0	0	0	0	0	0	0	2.30864e-05
T562	0.000150516	9.94e-05	0.000151269	0.00017882	7.79e-05	0.000131581		0.000150604	9.0327e-05	0.000141261	0.000113312	5.62e-05	0.000173592	0.000149454	7.03e-05	0.000112144	0.000138621	5.03e-05	5.33e-05	0.000167105	0.000182132	0.000140641	0.000174514		T562	1.90229e-05	0	9.67995e-06	0	0	4.20109e-05	1.78729e-05	0	0	7.03995e-06	0	0	3.55239e-05	5.05509e-05	9.05995e-06	4.29329e-05
G562	0.000110379	0.00021128	6.88e-05	0.000114956	0.00018178	0.000137439		0.000261047	0.000281017	0.000231154	0.000251804	0.000309076	0.000223189	0.000224182	0.00018075	0.000196252	0.000176427	0.000221397	0.000319519	0.000111404	0.000218558	0.000301374	0.000186979		G562	0.000123608	0.000143578	9.37151e-05	0.000114365	0.000171637	8.57501e-05	8.67431e-05	4.33111e-05	5.88131e-05	3.89881e-05	8.39581e-05	0.00018208	0	8.11191e-05	0.000163935	4.95401e-05
C562	1.00344e-05	3.73e-05	2.75e-05	7.66e-05	0	3.02869e-05		3.01208e-05	6.0218e-05	3.85e-05	0.000113312	0	4.96e-05	2.99e-05	4.02e-05	8.41e-05	2.52e-05	2.01e-05	5.33e-05	5.57e-05	3.64e-05	3.01e-05	3.74e-05		C562	0	2.99311e-05	8.21312e-06	8.30247e-05	0	1.93131e-05	0	9.91312e-06	5.38131e-05	0	0	2.30131e-05	2.54131e-05	6.11312e-06	0	7.11312e-06
A563	2.00902e-05	0	6.83e-05	2.57e-05	9.14e-05	4.1098e-05		3.01105e-05	7.02889e-05	5.17e-05	5.06002e-05	2.84e-05	6.24e-05	7.52e-05	4.02e-05	4.22e-05	1.27e-05	4.03e-05	8.06e-05	2.82e-05	6.11e-05	6.03e-05	3.76e-05		A563	0	2.91908e-05	1.0602e-05	9.5022e-06	0	2.1302e-05	3.4102e-05	0	1.10196e-06	0	0	3.9502e-05	0	2.0002e-05	1.9202e-05	0
T563	0.000100451	2.5e-05	1.37e-05	0.000115505	7.84e-05	6.66112e-05		9.03315e-05	0.000100413	0.000167937	0.000139151	0.000141782	0.000162184	0.000120308	0.000110533	8.45e-05	3.8e-05	0.000140977	9.41e-05	8.45e-05	4.89e-05	7.03e-05	6.27e-05		T563	2.37203e-05	3.38015e-05	0.000101326	7.25395e-05	7.51708e-05	9.55728e-05	5.36968e-05	4.39218e-05	1.78888e-05	0	7.43658e-05	2.74888e-05	1.78888e-05	0	3.68879e-06	0
G563	0	2.5e-05	0	1.28e-05	0	7.56e-06		1.00368e-05	0	0	0	0	0	0	1e-05	5.63e-05	0	1.01e-05	0.000107528	2.82e-05	0	0	2.51e-05		G563	2.47684e-06	0	0	0	0	0	0	2.44e-06	4.874e-05	0	2.54e-06	9.9968e-05	2.064e-05	0	0	1.754e-05
A564	8.03439e-05	8.76e-05	0.000124011	2.57e-05	2.61e-05	6.8751e-05		8.02761e-05	0.000100361	7.76e-05	0.000113972	1.42e-05	0	4.52e-05	9.04e-05	4.22e-05	2.53e-05	4.03e-05	5.37e-05	2.81e-05	2.45e-05	6.03e-05	2.51e-05		A564	1.15252e-05	3.16103e-05	8.84903e-06	4.52207e-05	0	0	0	2.1649e-05	0	0	0	0	0	0	0	0
G564	0	7.5e-05	0.000165348	3.85e-05	6.53e-05	6.88296e-05		1.00345e-05	6.02168e-05	7.76e-05	5.06541e-05	2.84e-05	3.75e-05	1.51e-05	7.03e-05	1.41e-05	1.27e-05	0	5.37e-05	7.03e-05	2.45e-05	1e-05	2.51e-05		G564	0	0	8.7704e-06	0	0	0	0	1.4704e-06	0	0	0	0	1.4704e-06	0	0	0
C564	0.000160688	0.000362727	8.27e-05	8.98e-05	0.000221976	0.000183578		0.000291001	0.000461662	0.000284473	0.000417896	0.000382859	0.000312254	0.000165618	0.000251218	0.000197161	0.000304021	0.000191268	0.000322213	0.000182833	0.000281235	0.000341513	0.000188175		C564	0.000107423	0.000278084	0.000100895	0.000234318	0.000199281	0.000128676	0	6.76399e-05	1.35829e-05	0.000120443	7.68985e-06	0.000138635	0	9.76569e-05	0.000157935	4.59685e-06
T565	0.000241677	1.24e-05	4.13e-05	5.05e-05	0.000115745	9.23244e-05		0.000180645	0.000110552	0.000191339	8.7569e-05	6.98e-05	4.92e-05	0.000104198	5.03e-05	9.73e-05	9.98e-05	0.000130997	7.91e-05	0.000193186	0.000108667	8.05e-05	4.96e-05		T565	8.83205e-05	1.82272e-05	9.90146e-05	0	0	0	1.18736e-05	0	4.97555e-06	7.47555e-06	3.86726e-05	0	0.000100862	1.63426e-05	0	0
G565	0.000161118	0.000222566	0.000110088	0.000126277	0.000205769	0.000165164		0.000381361	0.000522608	0.000497481	0.000312746	0.000418901	0.000381661	0.000238166	0.000231377	0.000319635	0.000187119	0.000221687	0.000250494	0.000289779	0.000169037	0.000181028	0.000248013		G565	0.000216198	0.000357444	0.000332317	0.000147583	0.000253737	0.000216497	7.30024e-05	6.62134e-05	0.000154471	2.19554e-05	5.65234e-05	8.53304e-05	0.000124615	3.87337e-06	1.58644e-05	8.28494e-05
C565	3.02097e-05	4.95e-05	0	5.05e-05	2.57e-05	3.11819e-05		1.00358e-05	2.01003e-05	1.28e-05	5.00394e-05	4.19e-05	0	7.44e-05	3.02e-05	0	6.24e-05	1.01e-05	3.96e-05	1.38e-05	3.62e-05	4.02e-05	3.72e-05		C565	0	0	0	1.88575e-05	1.07181e-05	0	4.32181e-05	0	0	3.12181e-05	0	8.41807e-06	0	5.01807e-06	9.01807e-06	6.01807e-06
A566	1.00297e-05	9.88e-05	0.000151532	0.000114037	0.000180526	0.000110985		3.01087e-05	3.0093e-05	8.92e-05	0.000112344	8.37e-05	6.15e-05	0.00010421	8.03e-05	9.76e-05	7.51e-05	4.03e-05	0.000198025	0.000179754	9.65e-05	3.01e-05	8.68e-05		A566	0	0	0	1.35918e-06	0	0	0	0	0	0	0	8.70401e-05	6.87691e-05	0	0	0
T566	0.000110327	8.65e-05	0.000509698	0.000126707	0.000154737	0.000197594		0.000210761	0.000240744	0.000191071	0.000137309	0.000153434	0.000282861	0.000148872	0.000140538	9.76e-05	0.000150175	0.000211334	0.000184823	5.53e-05	0.000253204	0.000140541	0.000223209		T566	1.31671e-05	4.31502e-05	0	0	0	8.52673e-05	0	0	0	0	1.37403e-05	0	0	5.56103e-05	0	2.56153e-05
G566	1.00297e-05	1.24e-05	0.000275512	1.27e-05	1.29e-05	6.47083e-05		2.00725e-05	0	3.82e-05	6.24134e-05	0	2.46e-05	0	0	4.18e-05	1.25e-05	1.01e-05	5.28e-05	5.53e-05	3.62e-05	0	1.24e-05		G566	0	0	0	0	0	0	0	0	0	0	0	0	0	0	0	0
T567	7.05716e-05	1.24e-05	2.73e-05	6.35e-05	7.74e-05	5.02343e-05		3.01247e-05	8.04845e-05	0.00014067	0.000137729	7e-05	0.000110948	5.97e-05	6.05e-05	9.76e-05	6.27e-05	6.05e-05	6.61e-05	5.53e-05	3.63e-05	0.000100709	6.21e-05		T567	0	3.02502e-05	9.04357e-05	8.74946e-05	1.97657e-05	6.07137e-05	9.46567e-06	1.02657e-05	4.73657e-05	1.24657e-05	1.02657e-05	1.58657e-05	5.06567e-06	0	5.04747e-05	1.18657e-05
G567	0.000282287	0.000173577	0	0.000101529	0.000167684	0.000145015		0.000351455	0.000472847	0.000370858	0.000250416	0.000433894	0.00040681	0.000313676	0.000171328	0.000236937	0.000213025	0.000221971	0.000264222	0.000234836	0.00015721	0.000241702	0.000149131		G567	0.00020644	0.000327831	0.000225843	0.000105401	0.000288879	0.000261795	0.000168661	2.63127e-05	9.19217e-05	6.80097e-05	7.69557e-05	0.000119207	8.98207e-05	1.21947e-05	9.66867e-05	4.1157e-06
C567	0.00012098	7.44e-05	1.36e-05	0.000139603	0.00010319	9.03546e-05		0.000120499	0.000211272	0.000281341	0.000162771	0.000139966	0.000234224	0.000104559	0.000100781	9.76e-05	0.000125309	7.06e-05	9.25e-05	0.000138139	0.000133024	4.03e-05	4.97e-05		C567	3.01443e-05	0.000120917	0.000190986	7.2416e-05	4.96114e-05	0.000143869	1.42044e-05	1.04264e-05	7.24541e-06	3.49544e-05	0	2.14541e-06	4.77844e-05	4.26694e-05	0	0
A568	6.03106e-05	4.96e-05	6.82e-05	3.8e-05	2.58e-05	4.83821e-05		6.01606e-05	0.000110426	0.00017885	0.000162775	4.2e-05	3.7e-05	2.99e-05	7.04e-05	0.0001114	8.76e-05	6.04e-05	5.29e-05	2.77e-05	7.26e-05	7.03e-05	6.21e-05		A568	1.17785e-05	6.20441e-05	0.000130468	0.000114393	0	0	0	2.20179e-05	6.30179e-05	3.92179e-05	1.20179e-05	4.51788e-06	0	2.42179e-05	2.19179e-05	1.37179e-05
T568	1.00518e-05	9.92e-05	1.36e-05	2.53e-05	5.15e-05	3.99304e-05		2.00535e-05	3.01162e-05	5.11e-05	7.51268e-05	5.6e-05	2.47e-05	4.48e-05	0	5.57e-05	5.01e-05	5.03e-05	5.29e-05	6.92e-05	0	3.01e-05	3.73e-05		T568	0	0	1.11696e-05	3.51964e-05	1.60696e-05	0	4.86965e-06	0	1.57696e-05	1.01696e-05	1.03696e-05	1.29696e-05	2.92696e-05	0	0	0
C568	2.01035e-05	3.72e-05	0.000231962	0	1.29e-05	6.04331e-05		1.00268e-05	0	1.28e-05	0	0	0	4.48e-05	0	0	0	1.01e-05	0	1.38e-05	2.42e-05	0	0		C568	0	0	0	0	0	0	0	0	0	0	0	0	0	0	0	0
A569	8.1488e-05	5.01e-05	6.86e-05	3.86e-05	9.19e-05	6.61376e-05		0.000121152	7.09155e-05	0.000116425	6.32583e-05	9.94e-05	6.24e-05	7.54e-05	6.1e-05	9.89e-05	3.82e-05	0.000152944	4.03e-05	9.87e-05	7.33e-05	0.000101539	7.55e-05		A569	5.50146e-05	4.77793e-06	5.02874e-05	0	3.32624e-05	0	9.26241e-06	0	3.27624e-05	0	8.68064e-05	0	3.25624e-05	7.16241e-06	3.54014e-05	9.36241e-06
G569	9.1674e-05	7.52e-05	0.000123525	0.00016748	0.000170635	0.000125703		7.06721e-05	6.07847e-05	7.76e-05	0.00015182	4.26e-05	6.24e-05	1.51e-05	8.13e-05	0.000197899	0.000241764	9.18e-05	5.37e-05	0.000183331	9.78e-05	3.05e-05	0.000100615		G569	0	0	0	2.61171e-05	0	0	0	0	7.21962e-05	0.000116061	0	0	5.76282e-05	0	0	0
C569	0.000122232	0.000250667	0.000123525	0.00016748	0.000170635	0.000166908		0.000212016	0.000374839	0.000582125	0.000771751	0.000269722	0.000274496	0.000256348	0.000172764	0.000197899	7.63e-05	0.000214122	0.000161176	0.000253843	0.000158891	0.000203079	0.00020123		C569	4.51085e-05	0.000207931	0.000415217	0.000604844	0.000102814	0.000107588	8.94402e-05	5.85621e-06	3.09912e-05	0	4.72142e-05	0	8.69352e-05	0	3.61712e-05	3.43222e-05
A570	8.12868e-05	7.53e-05	6.86e-05	5.15e-05	0.000117954	7.89282e-05		8.05883e-05	0.000101156	9.09e-05	7.60861e-05	4.27e-05	0.000150156	0.00013603	9.11e-05	8.48e-05	0.000114358	0.00010154	4.03e-05	5.64e-05	0	4.05e-05	8.81e-05		A570	1.66014e-06	2.22281e-05	1.19718e-05	0	0	7.12278e-05	5.71018e-05	1.21718e-05	5.87185e-06	3.54298e-05	2.26118e-05	0	0	0	0	9.17185e-06
T570	8.12868e-05	0.000100451	1.37e-05	0.000115906	7.86e-05	7.79888e-05		5.03677e-05	0.000101156	0.000103888	0.000101448	5.7e-05	0.000137643	7.56e-05	4.05e-05	0.000169604	8.89e-05	7.11e-05	9.41e-05	1.41e-05	8.57e-05	8.09e-05	0.00011327		T570	0	2.31675e-05	2.58992e-05	2.34594e-05	0	5.96542e-05	0	0	9.16152e-05	1.09112e-05	0	1.61112e-05	0	7.71125e-06	2.91125e-06	3.52812e-05
C570	3.04825e-05	5.02e-05	8.23e-05	1.29e-05	0	3.51765e-05		0	0	1.3e-05	2.5362e-05	4.27e-05	3.75e-05	0	1.01e-05	2.83e-05	1.27e-05	3.05e-05	2.69e-05	1.41e-05	0	2.02e-05	1.26e-05		C570	0	0	0	0	7.52349e-06	2.32349e-06	0	0	0	0	0	0	0	0	0	0
T571	9.11023e-05	8.76e-05	0	8.97e-05	3.91e-05	6.15005e-05		4.01885e-05	9.06682e-05	2.58e-05	5.05529e-05	7.1e-05	0	9.04e-05	7.06e-05	0.000112559	0.000101048	8.09e-05	0.000107095	7.02e-05	7.32e-05	6.05e-05	5.03e-05		T571	0	2.91678e-05	0	0	9.49953e-06	0	2.88995e-05	9.09953e-06	5.10585e-05	3.95475e-05	1.93995e-05	4.55945e-05	8.69953e-06	1.16995e-05	0	0
G571	0.00016196	0.000162675	0.000164094	8.97e-05	0.000130274	0.000141741		0.000442073	0.000443267	0.000193811	0.000202212	0.000369145	0.000249162	0.000180766	0.000322525	8.44e-05	0.000138942	0.000192199	0.000321285	0.000224565	0.000170748	0.000161276	0.000150767		G571	0.000300333	0.000301526	5.20705e-05	6.04711e-05	0.000227404	0.000107421	3.90255e-05	0.000180784	0	0	5.04585e-05	0.000179544	8.28245e-05	2.90075e-05	1.95355e-05	9.02646e-06
C571	2.0245e-05	3.75e-05	0.000314513	0.000102479	2.61e-05	0.000100167		4.01885e-05	2.01485e-05	0	5.05529e-05	1.42e-05	2.49e-05	1.51e-05	1.01e-05	4.22e-05	5.05e-05	2.02e-05	0	0	1.22e-05	5.04e-05	2.51e-05		C571	0	0	0	0	0	0	0	0	0	0	0	0	0	0	0	0
A572	0.000131026	0.000112219	0.000164758	0.000114637	0.000103752	0.000125278		0.000150643	0.000160985	0.000180108	0.000151156	0.000113124	0	0.000165399	7.05e-05	7e-05	0.000113219	5.05e-05	6.67e-05	5.58e-05	8.51e-05	8.05e-05	6.26e-05		A572	2.53649e-05	3.57068e-05	5.48296e-05	2.5878e-05	0	0	4.01206e-05	0	0	0	0	0	0	0	0	0
T572	9.07103e-05	2.49e-05	4.12e-05	0.000152849	3.89e-05	6.97119e-05		0.000110472	0.000120739	2.57e-05	6.29818e-05	0.000127264	9.92e-05	7.52e-05	7.05e-05	0.000139931	8.81e-05	0.000111015	0.000160013	5.58e-05	3.65e-05	3.02e-05	3.75e-05		T572	4.07599e-05	5.10271e-05	0	0	5.75521e-05	2.94881e-05	5.48815e-06	7.88148e-07	7.02191e-05	1.83881e-05	4.13031e-05	9.03011e-05	0	0	0	0
C572	6.04735e-05	0	1.37e-05	1.27e-05	2.59e-05	2.25547e-05		1.00429e-05	2.01232e-05	1.29e-05	5.03854e-05	2.83e-05	1.24e-05	0	0	4.2e-05	0	1.01e-05	5.33e-05	0	0	2.01e-05	3.75e-05		C572	0	0	0	2.78307e-05	5.7453e-06	0	0	0	1.94453e-05	0	0	3.07453e-05	0	0	0	1.49453e-05
[truncated: 4,362 more rows]
[truncated: 45 more columns]

## Sheet: Coverages
Illumina Miseq for the measurement of distribution of beneficial mutations
[truncated: 1,796 more rows]

## Sheet: Dominant mutations
Position number	Mutated nucleotide	Frequency	Original nucleotide
[truncated: 546 more rows]

[truncated: 1 more sheets: Original data]
